# Supplementary material for: Diversity of Bacterial Secondary Metabolite Biosynthetic Gene Clusters in Three Vietnamese Sponges
Source: MDPI journal article supplement (doi:10.3390/md21010029), 2022-12-29
Supplement: s1 [file s1]

Table S1. Basic data of the three metagenomes of sponge-associated bacteria

| Sample ID | Sponge species            | No. reads  | Contigs | Contigs sum (bp) | N50    | Longest contig (bp) | GC content (%) | No. CDS |
|-----------|---------------------------|------------|---------|------------------|--------|---------------------|----------------|---------|
| CLR       | <i>C. reinwardti</i>      | 30,414,932 | 607,208 | 475,723,993      | 56,925 | 236,946             | 61             | 888,255 |
| RHG       | <i>R. globostellata</i>   | 49,526,287 | 466,098 | 486,959,254      | 21,342 | 377,852             | 62             | 782,060 |
| SPV       | <i>Spheciospongia</i> sp. | 66,835,559 | 504,262 | 598,027,097      | 23,906 | 1,109,582           | 61             | 903,985 |

Table S2. BGCs identified from the metagenome of *C. reinwardti* by antiSMASH

| BGC ID          | BGC type      | Length (nt) | Most similar known cluster | MIBiG ID |
|-----------------|---------------|-------------|----------------------------|----------|
| CLR_cluster_008 | Arylpolyene   | 2496        | -                          | -        |
| CLR_cluster_032 | Arylpolyene   | 1296        | -                          | -        |
| CLR_cluster_044 | Arylpolyene   | 2508        | -                          | -        |
| CLR_cluster_070 | Arylpolyene   | 1212        | -                          | -        |
| CLR_cluster_081 | Arylpolyene   | 1917        | -                          | -        |
| CLR_cluster_102 | Arylpolyene   | 1086        | -                          | -        |
| CLR_cluster_137 | Arylpolyene   | 1290        | -                          | -        |
| CLR_cluster_221 | Arylpolyene   | 1197        | -                          | -        |
| CLR_cluster_028 | Bacteriocin   | 1302        | -                          | -        |
| CLR_cluster_037 | Bacteriocin   | 2277        | -                          | -        |
| CLR_cluster_063 | Bacteriocin   | 2328        | -                          | -        |
| CLR_cluster_067 | Bacteriocin   | 2319        | -                          | -        |
| CLR_cluster_092 | Bacteriocin   | 2322        | -                          | -        |
| CLR_cluster_119 | Bacteriocin   | 2316        | -                          | -        |
| CLR_cluster_120 | Bacteriocin   | 2280        | -                          | -        |
| CLR_cluster_169 | Bacteriocin   | 1302        | -                          | -        |
| CLR_cluster_170 | Bacteriocin   | 1206        | -                          | -        |
| CLR_cluster_195 | Bacteriocin   | 2259        | -                          | -        |
| CLR_cluster_274 | Bacteriocin   | 1026        | -                          | -        |
| CLR_cluster_280 | Bacteriocin   | 1086        | -                          | -        |
| CLR_cluster_001 | Cf fatty acid | 1242        | -                          | -        |
| CLR_cluster_006 | Cf fatty acid | 1236        | -                          | -        |
| CLR_cluster_007 | Cf fatty acid | 1239        | -                          | -        |
| CLR_cluster_009 | Cf fatty acid | 1185        | -                          | -        |
| CLR_cluster_012 | Cf fatty acid | 1236        | -                          | -        |
| CLR_cluster_013 | Cf fatty acid | 1242        | -                          | -        |
| CLR_cluster_015 | Cf fatty acid | 1236        | -                          | -        |
| CLR_cluster_017 | Cf fatty acid | 1182        | -                          | -        |
| CLR_cluster_022 | Cf fatty acid | 1245        | -                          | -        |
| CLR_cluster_023 | Cf fatty acid | 1008        | -                          | -        |
| CLR_cluster_025 | Cf fatty acid | 1263        | -                          | -        |
| CLR_cluster_030 | Cf fatty acid | 1266        | -                          | -        |
| CLR_cluster_031 | Cf fatty acid | 1071        | -                          | -        |
| CLR_cluster_041 | Cf fatty acid | 1239        | -                          | -        |
| CLR_cluster_043 | Cf fatty acid | 1374        | -                          | -        |
| CLR_cluster_045 | Cf fatty acid | 1242        | -                          | -        |
| CLR_cluster_046 | Cf fatty acid | 1044        | -                          | -        |
| CLR_cluster_049 | Cf fatty acid | 1239        | -                          | -        |
| CLR_cluster_060 | Cf fatty acid | 1278        | -                          | -        |
| CLR_cluster_064 | Cf fatty acid | 1236        | -                          | -        |
| CLR_cluster_065 | Cf fatty acid | 1251        | -                          | -        |

|                 |               |      |   |   |
|-----------------|---------------|------|---|---|
| CLR cluster 069 | Cf fatty acid | 1188 | - | - |
| CLR cluster 072 | Cf fatty acid | 1278 | - | - |
| CLR cluster 077 | Cf fatty acid | 1083 | - | - |
| CLR cluster 079 | Cf fatty acid | 1263 | - | - |
| CLR cluster 082 | Cf fatty acid | 1236 | - | - |
| CLR cluster 085 | Cf fatty acid | 1233 | - | - |
| CLR cluster 086 | Cf fatty acid | 1263 | - | - |
| CLR cluster 096 | Cf fatty acid | 1263 | - | - |
| CLR cluster 097 | Cf fatty acid | 1239 | - | - |
| CLR cluster 098 | Cf fatty acid | 1248 | - | - |
| CLR cluster 101 | Cf fatty acid | 1248 | - | - |
| CLR cluster 104 | Cf fatty acid | 1260 | - | - |
| CLR cluster 109 | Cf fatty acid | 1575 | - | - |
| CLR cluster 110 | Cf fatty acid | 1218 | - | - |
| CLR cluster 112 | Cf fatty acid | 1197 | - | - |
| CLR cluster 113 | Cf fatty acid | 1008 | - | - |
| CLR cluster 114 | Cf fatty acid | 1188 | - | - |
| CLR cluster 118 | Cf fatty acid | 1185 | - | - |
| CLR cluster 121 | Cf fatty acid | 1242 | - | - |
| CLR cluster 122 | Cf fatty acid | 1239 | - | - |
| CLR cluster 126 | Cf fatty acid | 1224 | - | - |
| CLR cluster 127 | Cf fatty acid | 1212 | - | - |
| CLR cluster 128 | Cf fatty acid | 1254 | - | - |
| CLR cluster 134 | Cf fatty acid | 1251 | - | - |
| CLR cluster 138 | Cf fatty acid | 1011 | - | - |
| CLR cluster 139 | Cf fatty acid | 1299 | - | - |
| CLR cluster 140 | Cf fatty acid | 1176 | - | - |
| CLR cluster 141 | Cf fatty acid | 1041 | - | - |
| CLR cluster 143 | Cf fatty acid | 1245 | - | - |
| CLR cluster 145 | Cf fatty acid | 1272 | - | - |
| CLR cluster 147 | Cf fatty acid | 1251 | - | - |
| CLR cluster 148 | Cf fatty acid | 1116 | - | - |
| CLR cluster 156 | Cf fatty acid | 1305 | - | - |
| CLR cluster 162 | Cf fatty acid | 1242 | - | - |
| CLR cluster 165 | Cf fatty acid | 1242 | - | - |
| CLR cluster 166 | Cf fatty acid | 1245 | - | - |
| CLR cluster 179 | Cf fatty acid | 1248 | - | - |
| CLR cluster 184 | Cf fatty acid | 1287 | - | - |
| CLR cluster 190 | Cf fatty acid | 1236 | - | - |
| CLR cluster 191 | Cf fatty acid | 1260 | - | - |
| CLR cluster 193 | Cf fatty acid | 1242 | - | - |
| CLR cluster 200 | Cf fatty acid | 1281 | - | - |
| CLR cluster 201 | Cf fatty acid | 1254 | - | - |

|                 |               |      |   |   |
|-----------------|---------------|------|---|---|
| CLR cluster 204 | Cf fatty acid | 1278 | - | - |
| CLR cluster 214 | Cf fatty acid | 1188 | - | - |
| CLR cluster 220 | Cf fatty acid | 1239 | - | - |
| CLR cluster 223 | Cf fatty acid | 1062 | - | - |
| CLR cluster 224 | Cf fatty acid | 1242 | - | - |
| CLR cluster 226 | Cf fatty acid | 1098 | - | - |
| CLR cluster 227 | Cf fatty acid | 1008 | - | - |
| CLR cluster 228 | Cf fatty acid | 1257 | - | - |
| CLR cluster 230 | Cf fatty acid | 1227 | - | - |
| CLR cluster 231 | Cf fatty acid | 1266 | - | - |
| CLR cluster 232 | Cf fatty acid | 1137 | - | - |
| CLR cluster 241 | Cf fatty acid | 1011 | - | - |
| CLR cluster 251 | Cf fatty acid | 1008 | - | - |
| CLR cluster 252 | Cf fatty acid | 1071 | - | - |
| CLR cluster 253 | Cf fatty acid | 1212 | - | - |
| CLR cluster 257 | Cf fatty acid | 1218 | - | - |
| CLR cluster 261 | Cf fatty acid | 1269 | - | - |
| CLR cluster 262 | Cf fatty acid | 1032 | - | - |
| CLR cluster 264 | Cf fatty acid | 1182 | - | - |
| CLR cluster 275 | Cf fatty acid | 1083 | - | - |
| CLR cluster 277 | Cf fatty acid | 1140 | - | - |
| CLR cluster 281 | Cf fatty acid | 1056 | - | - |
| CLR cluster 010 | Ladderane     | 1260 | - | - |
| CLR cluster 042 | Ladderane     | 1239 | - | - |
| CLR cluster 105 | Ladderane     | 1929 | - | - |
| CLR cluster 187 | Lantipeptide  | 3051 | - | - |
| CLR cluster 215 | Lantipeptide  | 2685 | - | - |
| CLR cluster 011 | Other         | 4272 | - | - |
| CLR cluster 018 | Other         | 4245 | - | - |
| CLR cluster 036 | Other         | 2793 | - | - |
| CLR cluster 051 | Other         | 3084 | - | - |
| CLR cluster 054 | Other         | 3087 | - | - |
| CLR cluster 083 | Other         | 2586 | - | - |
| CLR cluster 090 | Other         | 3261 | - | - |
| CLR cluster 094 | Other         | 3534 | - | - |
| CLR cluster 111 | Other         | 2643 | - | - |
| CLR cluster 142 | Other         | 3066 | - | - |
| CLR cluster 151 | Other         | 1716 | - | - |
| CLR cluster 164 | Other         | 2586 | - | - |
| CLR cluster 182 | Other         | 3705 | - | - |
| CLR cluster 196 | Other         | 2919 | - | - |
| CLR cluster 238 | Other         | 2169 | - | - |
| CLR cluster 258 | Other         | 1674 | - | - |

|                 |             |      |   |   |
|-----------------|-------------|------|---|---|
| CLR cluster 259 | Other       | 1569 | - | - |
| CLR cluster 273 | Other       | 1239 | - | - |
| CLR cluster 276 | Other       | 1182 | - | - |
| CLR cluster 158 | Phosphonate | 1650 | - | - |
| CLR cluster 171 | Phosphonate | 1368 | - | - |
| CLR cluster 209 | Phosphonate | 1635 | - | - |
| CLR cluster 240 | Phosphonate | 1626 | - | - |
| CLR cluster 267 | Phosphonate | 1446 | - | - |
| CLR cluster 002 | Terpene     | 3462 | - | - |
| CLR cluster 003 | Terpene     | 1083 | - | - |
| CLR cluster 004 | Terpene     | 1074 | - | - |
| CLR cluster 016 | Terpene     | 1062 | - | - |
| CLR cluster 019 | Terpene     | 1734 | - | - |
| CLR cluster 033 | Terpene     | 3435 | - | - |
| CLR cluster 035 | Terpene     | 2166 | - | - |
| CLR cluster 038 | Terpene     | 2139 | - | - |
| CLR cluster 039 | Terpene     | 1017 | - | - |
| CLR cluster 052 | Terpene     | 1071 | - | - |
| CLR cluster 061 | Terpene     | 1296 | - | - |
| CLR cluster 071 | Terpene     | 1020 | - | - |
| CLR cluster 073 | Terpene     | 1674 | - | - |
| CLR cluster 074 | Terpene     | 1050 | - | - |
| CLR cluster 078 | Terpene     | 3228 | - | - |
| CLR cluster 084 | Terpene     | 1692 | - | - |
| CLR cluster 088 | Terpene     | 1824 | - | - |
| CLR cluster 091 | Terpene     | 3405 | - | - |
| CLR cluster 095 | Terpene     | 3453 | - | - |
| CLR cluster 099 | Terpene     | 1047 | - | - |
| CLR cluster 100 | Terpene     | 1044 | - | - |
| CLR cluster 115 | Terpene     | 1068 | - | - |
| CLR cluster 116 | Terpene     | 1140 | - | - |
| CLR cluster 129 | Terpene     | 2082 | - | - |
| CLR cluster 150 | Terpene     | 1008 | - | - |
| CLR cluster 152 | Terpene     | 1647 | - | - |
| CLR cluster 157 | Terpene     | 2010 | - | - |
| CLR cluster 167 | Terpene     | 2313 | - | - |
| CLR cluster 168 | Terpene     | 1887 | - | - |
| CLR cluster 172 | Terpene     | 1680 | - | - |
| CLR cluster 178 | Terpene     | 1041 | - | - |
| CLR cluster 185 | Terpene     | 1728 | - | - |
| CLR cluster 186 | Terpene     | 3264 | - | - |
| CLR cluster 188 | Terpene     | 1899 | - | - |
| CLR cluster 189 | Terpene     | 1239 | - | - |

|                 |                    |       |   |   |
|-----------------|--------------------|-------|---|---|
| CLR_cluster_198 | Terpene            | 1065  | - | - |
| CLR_cluster_199 | Terpene            | 1050  | - | - |
| CLR_cluster_205 | Terpene            | 1332  | - | - |
| CLR_cluster_207 | Terpene            | 1974  | - | - |
| CLR_cluster_210 | Terpene            | 1035  | - | - |
| CLR_cluster_211 | Terpene            | 1068  | - | - |
| CLR_cluster_213 | Terpene            | 1035  | - | - |
| CLR_cluster_216 | Terpene            | 2109  | - | - |
| CLR_cluster_217 | Terpene            | 2028  | - | - |
| CLR_cluster_229 | Terpene            | 1020  | - | - |
| CLR_cluster_233 | Terpene            | 1050  | - | - |
| CLR_cluster_236 | Terpene            | 1482  | - | - |
| CLR_cluster_237 | Terpene            | 1524  | - | - |
| CLR_cluster_239 | Terpene            | 2001  | - | - |
| CLR_cluster_244 | Terpene            | 1614  | - | - |
| CLR_cluster_254 | Terpene            | 1011  | - | - |
| CLR_cluster_256 | Terpene            | 1005  | - | - |
| CLR_cluster_260 | Terpene            | 1665  | - | - |
| CLR_cluster_266 | Terpene            | 1209  | - | - |
| CLR_cluster_269 | Terpene            | 1215  | - | - |
| CLR_cluster_271 | Terpene            | 1131  | - | - |
| CLR_cluster_272 | Terpene            | 1266  | - | - |
| CLR_cluster_282 | Terpene            | 1014  | - | - |
| CLR_cluster_048 | TransAT-Type I PKS | 8226  | - | - |
| CLR_cluster_068 | TransAT-Type I PKS | 8994  | - | - |
| CLR_cluster_005 | Type I PKS         | 10320 | - | - |
| CLR_cluster_014 | Type I PKS         | 6555  | - | - |
| CLR_cluster_020 | Type I PKS         | 19140 | - | - |
| CLR_cluster_021 | Type I PKS         | 7794  | - | - |
| CLR_cluster_024 | Type I PKS         | 2562  | - | - |
| CLR_cluster_026 | Type I PKS         | 19746 | - | - |
| CLR_cluster_027 | Type I PKS         | 7008  | - | - |
| CLR_cluster_029 | Type I PKS         | 8106  | - | - |
| CLR_cluster_034 | Type I PKS         | 10374 | - | - |
| CLR_cluster_040 | Type I PKS         | 10056 | - | - |
| CLR_cluster_047 | Type I PKS         | 16260 | - | - |
| CLR_cluster_050 | Type I PKS         | 2832  | - | - |
| CLR_cluster_053 | Type I PKS         | 7077  | - | - |
| CLR_cluster_055 | Type I PKS         | 7068  | - | - |
| CLR_cluster_056 | Type I PKS         | 10275 | - | - |
| CLR_cluster_057 | Type I PKS         | 2772  | - | - |
| CLR_cluster_058 | Type I PKS         | 11181 | - | - |
| CLR_cluster_059 | Type I PKS         | 2649  | - | - |

|                 |            |       |   |   |
|-----------------|------------|-------|---|---|
| CLR_cluster_062 | Type I PKS | 6495  | - | - |
| CLR_cluster_066 | Type I PKS | 4437  | - | - |
| CLR_cluster_075 | Type I PKS | 10881 | - | - |
| CLR_cluster_076 | Type I PKS | 3072  | - | - |
| CLR_cluster_080 | Type I PKS | 5496  | - | - |
| CLR_cluster_087 | Type I PKS | 4038  | - | - |
| CLR_cluster_089 | Type I PKS | 4959  | - | - |
| CLR_cluster_093 | Type I PKS | 9165  | - | - |
| CLR_cluster_103 | Type I PKS | 6642  | - | - |
| CLR_cluster_106 | Type I PKS | 4266  | - | - |
| CLR_cluster_107 | Type I PKS | 7161  | - | - |
| CLR_cluster_108 | Type I PKS | 3225  | - | - |
| CLR_cluster_117 | Type I PKS | 5385  | - | - |
| CLR_cluster_123 | Type I PKS | 6360  | - | - |
| CLR_cluster_124 | Type I PKS | 4455  | - | - |
| CLR_cluster_125 | Type I PKS | 2550  | - | - |
| CLR_cluster_130 | Type I PKS | 1446  | - | - |
| CLR_cluster_131 | Type I PKS | 2880  | - | - |
| CLR_cluster_132 | Type I PKS | 4416  | - | - |
| CLR_cluster_133 | Type I PKS | 5451  | - | - |
| CLR_cluster_135 | Type I PKS | 3354  | - | - |
| CLR_cluster_136 | Type I PKS | 4158  | - | - |
| CLR_cluster_144 | Type I PKS | 2556  | - | - |
| CLR_cluster_146 | Type I PKS | 5475  | - | - |
| CLR_cluster_149 | Type I PKS | 5166  | - | - |
| CLR_cluster_153 | Type I PKS | 5187  | - | - |
| CLR_cluster_154 | Type I PKS | 4743  | - | - |
| CLR_cluster_155 | Type I PKS | 2772  | - | - |
| CLR_cluster_159 | Type I PKS | 3222  | - | - |
| CLR_cluster_160 | Type I PKS | 5052  | - | - |
| CLR_cluster_161 | Type I PKS | 4944  | - | - |
| CLR_cluster_163 | Type I PKS | 4758  | - | - |
| CLR_cluster_173 | Type I PKS | 4287  | - | - |
| CLR_cluster_174 | Type I PKS | 2730  | - | - |
| CLR_cluster_175 | Type I PKS | 4134  | - | - |
| CLR_cluster_176 | Type I PKS | 4062  | - | - |
| CLR_cluster_177 | Type I PKS | 3267  | - | - |
| CLR_cluster_180 | Type I PKS | 3852  | - | - |
| CLR_cluster_181 | Type I PKS | 2946  | - | - |
| CLR_cluster_183 | Type I PKS | 2442  | - | - |
| CLR_cluster_192 | Type I PKS | 3393  | - | - |
| CLR_cluster_194 | Type I PKS | 3096  | - | - |
| CLR_cluster_197 | Type I PKS | 3294  | - | - |

|                 |              |      |   |   |
|-----------------|--------------|------|---|---|
| CLR_cluster_202 | Type I PKS   | 2442 | - | - |
| CLR_cluster_203 | Type I PKS   | 3012 | - | - |
| CLR_cluster_206 | Type I PKS   | 2760 | - | - |
| CLR_cluster_208 | Type I PKS   | 2421 | - | - |
| CLR_cluster_212 | Type I PKS   | 2661 | - | - |
| CLR_cluster_218 | Type I PKS   | 2649 | - | - |
| CLR_cluster_219 | Type I PKS   | 2529 | - | - |
| CLR_cluster_222 | Type I PKS   | 2601 | - | - |
| CLR_cluster_225 | Type I PKS   | 2532 | - | - |
| CLR_cluster_234 | Type I PKS   | 2259 | - | - |
| CLR_cluster_235 | Type I PKS   | 2211 | - | - |
| CLR_cluster_242 | Type I PKS   | 2094 | - | - |
| CLR_cluster_245 | Type I PKS   | 1557 | - | - |
| CLR_cluster_246 | Type I PKS   | 1977 | - | - |
| CLR_cluster_247 | Type I PKS   | 2019 | - | - |
| CLR_cluster_248 | Type I PKS   | 2004 | - | - |
| CLR_cluster_249 | Type I PKS   | 2004 | - | - |
| CLR_cluster_250 | Type I PKS   | 1980 | - | - |
| CLR_cluster_255 | Type I PKS   | 1830 | - | - |
| CLR_cluster_265 | Type I PKS   | 1509 | - | - |
| CLR_cluster_268 | Type I PKS   | 1419 | - | - |
| CLR_cluster_278 | Type I PKS   | 1131 | - | - |
| CLR_cluster_279 | Type II PKS  | 1026 | - | - |
| CLR_cluster_243 | Type III PKS | 1011 | - | - |
| CLR_cluster_263 | Type III PKS | 1032 | - | - |
| CLR_cluster_270 | Type III PKS | 1086 | - | - |

“-”: no significant hit



Table S3. BGCs identified from the metagenome of *R. globostellata* by antiSMASH

| BGC ID          | BGC type      | Length (nt) | Most similar known cluster | MIBiG ID |
|-----------------|---------------|-------------|----------------------------|----------|
| RHG cluster 046 | Arylpolyene   | 2496        | -                          | -        |
| RHG cluster 061 | Arylpolyene   | 1197        | -                          | -        |
| RHG cluster 120 | Arylpolyene   | 1086        | -                          | -        |
| RHG cluster 121 | Arylpolyene   | 1212        | -                          | -        |
| RHG cluster 125 | Arylpolyene   | 1233        | -                          | -        |
| RHG cluster 134 | Arylpolyene   | 2508        | -                          | -        |
| RHG cluster 184 | Arylpolyene   | 1917        | -                          | -        |
| RHG cluster 231 | Arylpolyene   | 1230        | -                          | -        |
| RHG cluster 232 | Arylpolyene   | 1230        | -                          | -        |
| RHG cluster 253 | Arylpolyene   | 1290        | -                          | -        |
| RHG cluster 005 | Bacteriocin   | 2316        | -                          | -        |
| RHG cluster 021 | Bacteriocin   | 2355        | -                          | -        |
| RHG cluster 024 | Bacteriocin   | 1350        | -                          | -        |
| RHG cluster 025 | Bacteriocin   | 2277        | -                          | -        |
| RHG cluster 032 | Bacteriocin   | 2280        | -                          | -        |
| RHG cluster 038 | Bacteriocin   | 2322        | -                          | -        |
| RHG cluster 083 | Bacteriocin   | 2328        | -                          | -        |
| RHG cluster 092 | Bacteriocin   | 1929        | -                          | -        |
| RHG cluster 115 | Bacteriocin   | 2319        | -                          | -        |
| RHG cluster 139 | Bacteriocin   | 2292        | -                          | -        |
| RHG cluster 181 | Bacteriocin   | 2319        | -                          | -        |
| RHG cluster 189 | Bacteriocin   | 1308        | -                          | -        |
| RHG cluster 251 | Bacteriocin   | 1302        | -                          | -        |
| RHG cluster 257 | Bacteriocin   | 1911        | -                          | -        |
| RHG cluster 297 | Bacteriocin   | 2952        | -                          | -        |
| RHG cluster 325 | Bacteriocin   | 1197        | -                          | -        |
| RHG cluster 004 | Cf fatty acid | 1263        | -                          | -        |
| RHG cluster 007 | Cf fatty acid | 1236        | -                          | -        |
| RHG cluster 009 | Cf fatty acid | 1236        | -                          | -        |
| RHG cluster 010 | Cf fatty acid | 1008        | -                          | -        |
| RHG cluster 012 | Cf fatty acid | 1242        | -                          | -        |
| RHG cluster 018 | Cf fatty acid | 1239        | -                          | -        |
| RHG cluster 020 | Cf fatty acid | 1254        | -                          | -        |
| RHG cluster 023 | Cf fatty acid | 1248        | -                          | -        |
| RHG cluster 030 | Cf fatty acid | 1248        | -                          | -        |
| RHG cluster 031 | Cf fatty acid | 1266        | -                          | -        |
| RHG cluster 033 | Cf fatty acid | 1212        | -                          | -        |
| RHG cluster 035 | Cf fatty acid | 1245        | -                          | -        |
| RHG cluster 039 | Cf fatty acid | 1257        | -                          | -        |
| RHG cluster 045 | Cf fatty acid | 1185        | -                          | -        |
| RHG cluster 049 | Cf fatty acid | 1236        | -                          | -        |

|                 |               |      |   |   |
|-----------------|---------------|------|---|---|
| RHG cluster 051 | Cf fatty acid | 1182 | - | - |
| RHG cluster 059 | Cf fatty acid | 1182 | - | - |
| RHG cluster 065 | Cf fatty acid | 1278 | - | - |
| RHG cluster 068 | Cf fatty acid | 1236 | - | - |
| RHG cluster 073 | Cf fatty acid | 1218 | - | - |
| RHG cluster 074 | Cf fatty acid | 1206 | - | - |
| RHG cluster 075 | Cf fatty acid | 1254 | - | - |
| RHG cluster 077 | Cf fatty acid | 1287 | - | - |
| RHG cluster 078 | Cf fatty acid | 1299 | - | - |
| RHG cluster 079 | Cf fatty acid | 1266 | - | - |
| RHG cluster 081 | Cf fatty acid | 1311 | - | - |
| RHG cluster 084 | Cf fatty acid | 1263 | - | - |
| RHG cluster 085 | Cf fatty acid | 1188 | - | - |
| RHG cluster 086 | Cf fatty acid | 1260 | - | - |
| RHG cluster 089 | Cf fatty acid | 1032 | - | - |
| RHG cluster 095 | Cf fatty acid | 1212 | - | - |
| RHG cluster 097 | Cf fatty acid | 1281 | - | - |
| RHG cluster 098 | Cf fatty acid | 1242 | - | - |
| RHG cluster 099 | Cf fatty acid | 1005 | - | - |
| RHG cluster 103 | Cf fatty acid | 1155 | - | - |
| RHG cluster 108 | Cf fatty acid | 1218 | - | - |
| RHG cluster 112 | Cf fatty acid | 1008 | - | - |
| RHG cluster 114 | Cf fatty acid | 1233 | - | - |
| RHG cluster 122 | Cf fatty acid | 1236 | - | - |
| RHG cluster 127 | Cf fatty acid | 1263 | - | - |
| RHG cluster 130 | Cf fatty acid | 1251 | - | - |
| RHG cluster 133 | Cf fatty acid | 1374 | - | - |
| RHG cluster 138 | Cf fatty acid | 1239 | - | - |
| RHG cluster 141 | Cf fatty acid | 1080 | - | - |
| RHG cluster 142 | Cf fatty acid | 1245 | - | - |
| RHG cluster 143 | Cf fatty acid | 1254 | - | - |
| RHG cluster 144 | Cf fatty acid | 1236 | - | - |
| RHG cluster 148 | Cf fatty acid | 1242 | - | - |
| RHG cluster 150 | Cf fatty acid | 1263 | - | - |
| RHG cluster 151 | Cf fatty acid | 1197 | - | - |
| RHG cluster 153 | Cf fatty acid | 1224 | - | - |
| RHG cluster 155 | Cf fatty acid | 1272 | - | - |
| RHG cluster 156 | Cf fatty acid | 1227 | - | - |
| RHG cluster 172 | Cf fatty acid | 1260 | - | - |
| RHG cluster 173 | Cf fatty acid | 1005 | - | - |
| RHG cluster 175 | Cf fatty acid | 1044 | - | - |
| RHG cluster 176 | Cf fatty acid | 1956 | - | - |
| RHG cluster 178 | Cf fatty acid | 1254 | - | - |

|                 |               |      |   |   |
|-----------------|---------------|------|---|---|
| RHG cluster 182 | Cf fatty acid | 1854 | - | - |
| RHG cluster 185 | Cf fatty acid | 1251 | - | - |
| RHG cluster 186 | Cf fatty acid | 1032 | - | - |
| RHG cluster 188 | Cf fatty acid | 1242 | - | - |
| RHG cluster 190 | Cf fatty acid | 1101 | - | - |
| RHG cluster 196 | Cf fatty acid | 1116 | - | - |
| RHG cluster 211 | Cf fatty acid | 1071 | - | - |
| RHG cluster 212 | Cf fatty acid | 1176 | - | - |
| RHG cluster 214 | Cf fatty acid | 1260 | - | - |
| RHG cluster 216 | Cf fatty acid | 1272 | - | - |
| RHG cluster 218 | Cf fatty acid | 1242 | - | - |
| RHG cluster 220 | Cf fatty acid | 1245 | - | - |
| RHG cluster 222 | Cf fatty acid | 1263 | - | - |
| RHG cluster 225 | Cf fatty acid | 1242 | - | - |
| RHG cluster 227 | Cf fatty acid | 1233 | - | - |
| RHG cluster 228 | Cf fatty acid | 1044 | - | - |
| RHG cluster 235 | Cf fatty acid | 1239 | - | - |
| RHG cluster 236 | Cf fatty acid | 1185 | - | - |
| RHG cluster 239 | Cf fatty acid | 1035 | - | - |
| RHG cluster 241 | Cf fatty acid | 1218 | - | - |
| RHG cluster 244 | Cf fatty acid | 1254 | - | - |
| RHG cluster 245 | Cf fatty acid | 1077 | - | - |
| RHG cluster 250 | Cf fatty acid | 1212 | - | - |
| RHG cluster 254 | Cf fatty acid | 1011 | - | - |
| RHG cluster 259 | Cf fatty acid | 1188 | - | - |
| RHG cluster 263 | Cf fatty acid | 1239 | - | - |
| RHG cluster 264 | Cf fatty acid | 1248 | - | - |
| RHG cluster 265 | Cf fatty acid | 1170 | - | - |
| RHG cluster 270 | Cf fatty acid | 1542 | - | - |
| RHG cluster 271 | Cf fatty acid | 1293 | - | - |
| RHG cluster 273 | Cf fatty acid | 1188 | - | - |
| RHG cluster 274 | Cf fatty acid | 1242 | - | - |
| RHG cluster 275 | Cf fatty acid | 1092 | - | - |
| RHG cluster 277 | Cf fatty acid | 1263 | - | - |
| RHG cluster 278 | Cf fatty acid | 1233 | - | - |
| RHG cluster 281 | Cf fatty acid | 1245 | - | - |
| RHG cluster 286 | Cf fatty acid | 1008 | - | - |
| RHG cluster 292 | Cf fatty acid | 1086 | - | - |
| RHG cluster 293 | Cf fatty acid | 1005 | - | - |
| RHG cluster 301 | Cf fatty acid | 1251 | - | - |
| RHG cluster 303 | Cf fatty acid | 1221 | - | - |
| RHG cluster 305 | Cf fatty acid | 1245 | - | - |
| RHG cluster 310 | Cf fatty acid | 1164 | - | - |

|                 |               |      |   |   |
|-----------------|---------------|------|---|---|
| RHG cluster 313 | Cf fatty acid | 1254 | - | - |
| RHG cluster 315 | Cf fatty acid | 1101 | - | - |
| RHG cluster 317 | Cf fatty acid | 1263 | - | - |
| RHG cluster 319 | Cf fatty acid | 1248 | - | - |
| RHG cluster 321 | Cf fatty acid | 1113 | - | - |
| RHG cluster 324 | Cf fatty acid | 1236 | - | - |
| RHG cluster 328 | Cf fatty acid | 1002 | - | - |
| RHG cluster 332 | Cf fatty acid | 1191 | - | - |
| RHG cluster 334 | Cf fatty acid | 1215 | - | - |
| RHG cluster 343 | Cf fatty acid | 1104 | - | - |
| RHG cluster 344 | Cf fatty acid | 1242 | - | - |
| RHG cluster 347 | Cf fatty acid | 1242 | - | - |
| RHG cluster 348 | Cf fatty acid | 1260 | - | - |
| RHG cluster 352 | Cf fatty acid | 1020 | - | - |
| RHG cluster 355 | Cf fatty acid | 1014 | - | - |
| RHG cluster 359 | Cf fatty acid | 1110 | - | - |
| RHG cluster 360 | Cf fatty acid | 1212 | - | - |
| RHG cluster 365 | Cf fatty acid | 1026 | - | - |
| RHG cluster 044 | Ladderane     | 1260 | - | - |
| RHG cluster 111 | Ladderane     | 1929 | - | - |
| RHG cluster 116 | Ladderane     | 1926 | - | - |
| RHG cluster 132 | Ladderane     | 1239 | - | - |
| RHG cluster 093 | Lantipeptide  | 3186 | - | - |
| RHG cluster 001 | Other         | 4272 | - | - |
| RHG cluster 022 | Other         | 2550 | - | - |
| RHG cluster 029 | Other         | 2589 | - | - |
| RHG cluster 048 | Other         | 4188 | - | - |
| RHG cluster 064 | Other         | 2586 | - | - |
| RHG cluster 066 | Other         | 1941 | - | - |
| RHG cluster 070 | Other         | 2883 | - | - |
| RHG cluster 082 | Other         | 2796 | - | - |
| RHG cluster 088 | Other         | 3084 | - | - |
| RHG cluster 110 | Other         | 2970 | - | - |
| RHG cluster 126 | Other         | 2874 | - | - |
| RHG cluster 131 | Other         | 2802 | - | - |
| RHG cluster 171 | Other         | 2643 | - | - |
| RHG cluster 187 | Other         | 2529 | - | - |
| RHG cluster 205 | Other         | 3171 | - | - |
| RHG cluster 210 | Other         | 2259 | - | - |
| RHG cluster 223 | Other         | 3087 | - | - |
| RHG cluster 260 | Other         | 2322 | - | - |
| RHG cluster 287 | Other         | 2793 | - | - |
| RHG cluster 300 | Other         | 2802 | - | - |

|                 |             |      |   |   |
|-----------------|-------------|------|---|---|
| RHG cluster 312 | Other       | 2895 | - | - |
| RHG cluster 329 | Other       | 2412 | - | - |
| RHG cluster 333 | Other       | 2304 | - | - |
| RHG cluster 339 | Other       | 1317 | - | - |
| RHG cluster 346 | Other       | 1842 | - | - |
| RHG cluster 349 | Other       | 1731 | - | - |
| RHG cluster 361 | Other       | 1215 | - | - |
| RHG cluster 368 | Other       | 1077 | - | - |
| RHG cluster 371 | Other       | 1008 | - | - |
| RHG cluster 166 | Phosphonate | 1650 | - | - |
| RHG cluster 230 | Phosphonate | 1635 | - | - |
| RHG cluster 290 | Phosphonate | 1680 | - | - |
| RHG cluster 291 | Phosphonate | 1665 | - | - |
| RHG cluster 370 | Phosphonate | 1029 | - | - |
| RHG cluster 002 | Terpene     | 1995 | - | - |
| RHG cluster 003 | Terpene     | 3462 | - | - |
| RHG cluster 006 | Terpene     | 1062 | - | - |
| RHG cluster 013 | Terpene     | 1065 | - | - |
| RHG cluster 015 | Terpene     | 2166 | - | - |
| RHG cluster 026 | Terpene     | 1020 | - | - |
| RHG cluster 036 | Terpene     | 1716 | - | - |
| RHG cluster 041 | Terpene     | 3501 | - | - |
| RHG cluster 042 | Terpene     | 1041 | - | - |
| RHG cluster 043 | Terpene     | 3435 | - | - |
| RHG cluster 047 | Terpene     | 1074 | - | - |
| RHG cluster 050 | Terpene     | 3408 | - | - |
| RHG cluster 052 | Terpene     | 1059 | - | - |
| RHG cluster 055 | Terpene     | 3441 | - | - |
| RHG cluster 058 | Terpene     | 3432 | - | - |
| RHG cluster 060 | Terpene     | 1974 | - | - |
| RHG cluster 063 | Terpene     | 1041 | - | - |
| RHG cluster 071 | Terpene     | 1968 | - | - |
| RHG cluster 101 | Terpene     | 1068 | - | - |
| RHG cluster 102 | Terpene     | 3390 | - | - |
| RHG cluster 104 | Terpene     | 2160 | - | - |
| RHG cluster 105 | Terpene     | 1044 | - | - |
| RHG cluster 106 | Terpene     | 1047 | - | - |
| RHG cluster 107 | Terpene     | 1095 | - | - |
| RHG cluster 113 | Terpene     | 1044 | - | - |
| RHG cluster 118 | Terpene     | 1728 | - | - |
| RHG cluster 123 | Terpene     | 3405 | - | - |
| RHG cluster 137 | Terpene     | 1962 | - | - |
| RHG cluster 146 | Terpene     | 2016 | - | - |

|                 |             |       |   |   |
|-----------------|-------------|-------|---|---|
| RHG cluster 152 | Terpene     | 2022  | - | - |
| RHG cluster 157 | Terpene     | 3381  | - | - |
| RHG cluster 158 | Terpene     | 1098  | - | - |
| RHG cluster 169 | Terpene     | 3453  | - | - |
| RHG cluster 170 | Terpene     | 1068  | - | - |
| RHG cluster 180 | Terpene     | 1050  | - | - |
| RHG cluster 199 | Terpene     | 1041  | - | - |
| RHG cluster 200 | Terpene     | 1020  | - | - |
| RHG cluster 201 | Terpene     | 1071  | - | - |
| RHG cluster 207 | Terpene     | 1050  | - | - |
| RHG cluster 219 | Terpene     | 1095  | - | - |
| RHG cluster 224 | Terpene     | 3420  | - | - |
| RHG cluster 234 | Terpene     | 2022  | - | - |
| RHG cluster 243 | Terpene     | 1068  | - | - |
| RHG cluster 247 | Terpene     | 3135  | - | - |
| RHG cluster 252 | Terpene     | 1983  | - | - |
| RHG cluster 256 | Terpene     | 2139  | - | - |
| RHG cluster 276 | Terpene     | 1992  | - | - |
| RHG cluster 280 | Terpene     | 1899  | - | - |
| RHG cluster 284 | Terpene     | 2067  | - | - |
| RHG cluster 299 | Terpene     | 1572  | - | - |
| RHG cluster 304 | Terpene     | 1995  | - | - |
| RHG cluster 309 | Terpene     | 2028  | - | - |
| RHG cluster 311 | Terpene     | 1650  | - | - |
| RHG cluster 314 | Terpene     | 1197  | - | - |
| RHG cluster 320 | Terpene     | 1071  | - | - |
| RHG cluster 323 | Terpene     | 1269  | - | - |
| RHG cluster 327 | Terpene     | 1287  | - | - |
| RHG cluster 330 | Terpene     | 1386  | - | - |
| RHG cluster 331 | Terpene     | 1806  | - | - |
| RHG cluster 337 | Terpene     | 1800  | - | - |
| RHG cluster 350 | Terpene     | 1071  | - | - |
| RHG cluster 353 | Terpene     | 1434  | - | - |
| RHG cluster 363 | Terpene     | 1044  | - | - |
| RHG cluster 364 | Terpene     | 1176  | - | - |
| RHG cluster 366 | Terpene     | 1122  | - | - |
| RHG cluster 369 | Terpene     | 1032  | - | - |
| RHG cluster 014 | TransAT-PKS | 4770  | - | - |
| RHG cluster 161 | TransAT-PKS | 4773  | - | - |
| RHG cluster 008 | Type I PKS  | 10395 | - | - |
| RHG cluster 011 | Type I PKS  | 7044  | - | - |
| RHG cluster 016 | Type I PKS  | 7062  | - | - |
| RHG cluster 017 | Type I PKS  | 1428  | - | - |

|                 |            |       |   |   |
|-----------------|------------|-------|---|---|
| RHG cluster 019 | Type I PKS | 22404 | - | - |
| RHG cluster 027 | Type I PKS | 10014 | - | - |
| RHG cluster 028 | Type I PKS | 7044  | - | - |
| RHG cluster 034 | Type I PKS | 7008  | - | - |
| RHG cluster 037 | Type I PKS | 10272 | - | - |
| RHG cluster 040 | Type I PKS | 9582  | - | - |
| RHG cluster 053 | Type I PKS | 9519  | - | - |
| RHG cluster 054 | Type I PKS | 9642  | - | - |
| RHG cluster 056 | Type I PKS | 10263 | - | - |
| RHG cluster 057 | Type I PKS | 10320 | - | - |
| RHG cluster 062 | Type I PKS | 6021  | - | - |
| RHG cluster 067 | Type I PKS | 7056  | - | - |
| RHG cluster 069 | Type I PKS | 10290 | - | - |
| RHG cluster 072 | Type I PKS | 7101  | - | - |
| RHG cluster 087 | Type I PKS | 9624  | - | - |
| RHG cluster 090 | Type I PKS | 10269 | - | - |
| RHG cluster 091 | Type I PKS | 7053  | - | - |
| RHG cluster 094 | Type I PKS | 4569  | - | - |
| RHG cluster 096 | Type I PKS | 7059  | - | - |
| RHG cluster 100 | Type I PKS | 10335 | - | - |
| RHG cluster 109 | Type I PKS | 5502  | - | - |
| RHG cluster 119 | Type I PKS | 29196 | - | - |
| RHG cluster 124 | Type I PKS | 9531  | - | - |
| RHG cluster 128 | Type I PKS | 7200  | - | - |
| RHG cluster 135 | Type I PKS | 7053  | - | - |
| RHG cluster 136 | Type I PKS | 7008  | - | - |
| RHG cluster 140 | Type I PKS | 23358 | - | - |
| RHG cluster 145 | Type I PKS | 7791  | - | - |
| RHG cluster 147 | Type I PKS | 10374 | - | - |
| RHG cluster 149 | Type I PKS | 8457  | - | - |
| RHG cluster 154 | Type I PKS | 10272 | - | - |
| RHG cluster 159 | Type I PKS | 13836 | - | - |
| RHG cluster 160 | Type I PKS | 8067  | - | - |
| RHG cluster 162 | Type I PKS | 10365 | - | - |
| RHG cluster 163 | Type I PKS | 4290  | - | - |
| RHG cluster 164 | Type I PKS | 10131 | - | - |
| RHG cluster 165 | Type I PKS | 10275 | - | - |
| RHG cluster 167 | Type I PKS | 4974  | - | - |
| RHG cluster 168 | Type I PKS | 2112  | - | - |
| RHG cluster 174 | Type I PKS | 4308  | - | - |
| RHG cluster 177 | Type I PKS | 10428 | - | - |
| RHG cluster 179 | Type I PKS | 10326 | - | - |
| RHG cluster 183 | Type I PKS | 6192  | - | - |

|                 |            |       |   |   |
|-----------------|------------|-------|---|---|
| RHG cluster 191 | Type I PKS | 4482  | - | - |
| RHG cluster 192 | Type I PKS | 4995  | - | - |
| RHG cluster 193 | Type I PKS | 12108 | - | - |
| RHG cluster 194 | Type I PKS | 8955  | - | - |
| RHG cluster 195 | Type I PKS | 8292  | - | - |
| RHG cluster 197 | Type I PKS | 6048  | - | - |
| RHG cluster 198 | Type I PKS | 8178  | - | - |
| RHG cluster 202 | Type I PKS | 6786  | - | - |
| RHG cluster 203 | Type I PKS | 11394 | - | - |
| RHG cluster 204 | Type I PKS | 7527  | - | - |
| RHG cluster 206 | Type I PKS | 4830  | - | - |
| RHG cluster 208 | Type I PKS | 3666  | - | - |
| RHG cluster 209 | Type I PKS | 7137  | - | - |
| RHG cluster 213 | Type I PKS | 7113  | - | - |
| RHG cluster 215 | Type I PKS | 2184  | - | - |
| RHG cluster 217 | Type I PKS | 5310  | - | - |
| RHG cluster 221 | Type I PKS | 1890  | - | - |
| RHG cluster 226 | Type I PKS | 4512  | - | - |
| RHG cluster 229 | Type I PKS | 5406  | - | - |
| RHG cluster 233 | Type I PKS | 8346  | - | - |
| RHG cluster 237 | Type I PKS | 2496  | - | - |
| RHG cluster 238 | Type I PKS | 2283  | - | - |
| RHG cluster 240 | Type I PKS | 7725  | - | - |
| RHG cluster 242 | Type I PKS | 2130  | - | - |
| RHG cluster 246 | Type I PKS | 7095  | - | - |
| RHG cluster 248 | Type I PKS | 4281  | - | - |
| RHG cluster 249 | Type I PKS | 2526  | - | - |
| RHG cluster 255 | Type I PKS | 1890  | - | - |
| RHG cluster 258 | Type I PKS | 6234  | - | - |
| RHG cluster 261 | Type I PKS | 2907  | - | - |
| RHG cluster 262 | Type I PKS | 3486  | - | - |
| RHG cluster 266 | Type I PKS | 5229  | - | - |
| RHG cluster 268 | Type I PKS | 5331  | - | - |
| RHG cluster 269 | Type I PKS | 2643  | - | - |
| RHG cluster 272 | Type I PKS | 1926  | - | - |
| RHG cluster 279 | Type I PKS | 2157  | - | - |
| RHG cluster 282 | Type I PKS | 1602  | - | - |
| RHG cluster 283 | Type I PKS | 4533  | - | - |
| RHG cluster 285 | Type I PKS | 4344  | - | - |
| RHG cluster 288 | Type I PKS | 3843  | - | - |
| RHG cluster 289 | Type I PKS | 4062  | - | - |
| RHG cluster 294 | Type I PKS | 2355  | - | - |
| RHG cluster 295 | Type I PKS | 3690  | - | - |



|                 |              |      |   |   |
|-----------------|--------------|------|---|---|
| RHG cluster 296 | Type I PKS   | 2556 | - | - |
| RHG cluster 298 | Type I PKS   | 3135 | - | - |
| RHG cluster 302 | Type I PKS   | 2619 | - | - |
| RHG cluster 306 | Type I PKS   | 3261 | - | - |
| RHG cluster 308 | Type I PKS   | 1767 | - | - |
| RHG cluster 316 | Type I PKS   | 2415 | - | - |
| RHG cluster 318 | Type I PKS   | 1965 | - | - |
| RHG cluster 322 | Type I PKS   | 2730 | - | - |
| RHG cluster 326 | Type I PKS   | 2625 | - | - |
| RHG cluster 335 | Type I PKS   | 2232 | - | - |
| RHG cluster 336 | Type I PKS   | 2196 | - | - |
| RHG cluster 338 | Type I PKS   | 2115 | - | - |
| RHG cluster 340 | Type I PKS   | 2034 | - | - |
| RHG cluster 341 | Type I PKS   | 2031 | - | - |
| RHG cluster 342 | Type I PKS   | 1938 | - | - |
| RHG cluster 345 | Type I PKS   | 1893 | - | - |
| RHG cluster 351 | Type I PKS   | 1608 | - | - |
| RHG cluster 354 | Type I PKS   | 1518 | - | - |
| RHG cluster 356 | Type I PKS   | 1455 | - | - |
| RHG cluster 357 | Type I PKS   | 1443 | - | - |
| RHG cluster 362 | Type I PKS   | 1209 | - | - |
| RHG cluster 367 | Type I PKS   | 1098 | - | - |
| RHG cluster 080 | Type II PKS  | 1191 | - | - |
| RHG cluster 076 | Type III PKS | 1056 | - | - |
| RHG cluster 117 | Type III PKS | 1086 | - | - |
| RHG cluster 129 | Type III PKS | 1056 | - | - |
| RHG cluster 267 | Type III PKS | 1086 | - | - |
| RHG cluster 307 | Type III PKS | 1056 | - | - |
| RHG cluster 358 | Type III PKS | 1086 | - | - |

“-”: no significant hit

Table S4. BGCs identified from the metagenome of *Spheciospongia* sp. by antiSMASH

| BGC ID          | BGC type      | Length (nt) | Most similar known cluster | MIBiG ID |
|-----------------|---------------|-------------|----------------------------|----------|
| SPV cluster 094 | Arylpolyene   | 2496        | -                          | -        |
| SPV cluster 112 | Arylpolyene   | 1296        | -                          | -        |
| SPV cluster 123 | Arylpolyene   | 2508        | -                          | -        |
| SPV cluster 136 | Arylpolyene   | 1233        | -                          | -        |
| SPV cluster 137 | Arylpolyene   | 1212        | -                          | -        |
| SPV cluster 138 | Arylpolyene   | 1224        | -                          | -        |
| SPV cluster 312 | Arylpolyene   | 1290        | -                          | -        |
| SPV cluster 345 | Arylpolyene   | 1176        | -                          | -        |
| SPV cluster 376 | Arylpolyene   | 1197        | -                          | -        |
| SPV cluster 021 | Bacteriocin   | 1302        | -                          | -        |
| SPV cluster 064 | Bacteriocin   | 1929        | -                          | -        |
| SPV cluster 135 | Bacteriocin   | 2280        | -                          | -        |
| SPV cluster 139 | Bacteriocin   | 2277        | -                          | -        |
| SPV cluster 176 | Bacteriocin   | 1302        | -                          | -        |
| SPV cluster 198 | Bacteriocin   | 1302        | -                          | -        |
| SPV cluster 199 | Bacteriocin   | 2319        | -                          | -        |
| SPV cluster 297 | Bacteriocin   | 2277        | -                          | -        |
| SPV cluster 346 | Bacteriocin   | 1800        | -                          | -        |
| SPV cluster 350 | Bacteriocin   | 2241        | -                          | -        |
| SPV cluster 355 | Bacteriocin   | 3021        | -                          | -        |
| SPV cluster 398 | Bacteriocin   | 1023        | -                          | -        |
| SPV cluster 424 | Bacteriocin   | 1629        | -                          | -        |
| SPV cluster 431 | Bacteriocin   | 1230        | -                          | -        |
| SPV cluster 002 | Cf fatty acid | 1242        | -                          | -        |
| SPV cluster 003 | Cf fatty acid | 1245        | -                          | -        |
| SPV cluster 007 | Cf fatty acid | 1263        | -                          | -        |
| SPV cluster 009 | Cf fatty acid | 1233        | -                          | -        |
| SPV cluster 014 | Cf fatty acid | 1251        | -                          | -        |
| SPV cluster 015 | Cf fatty acid | 1236        | -                          | -        |
| SPV cluster 016 | Cf fatty acid | 1575        | -                          | -        |
| SPV cluster 024 | Cf fatty acid | 1254        | -                          | -        |
| SPV cluster 025 | Cf fatty acid | 1242        | -                          | -        |
| SPV cluster 026 | Cf fatty acid | 1044        | -                          | -        |
| SPV cluster 027 | Cf fatty acid | 1266        | -                          | -        |
| SPV cluster 028 | Cf fatty acid | 1053        | -                          | -        |
| SPV cluster 031 | Cf fatty acid | 1257        | -                          | -        |
| SPV cluster 032 | Cf fatty acid | 1248        | -                          | -        |
| SPV cluster 033 | Cf fatty acid | 1239        | -                          | -        |
| SPV cluster 034 | Cf fatty acid | 1080        | -                          | -        |
| SPV cluster 036 | Cf fatty acid | 1242        | -                          | -        |
| SPV cluster 037 | Cf fatty acid | 1242        | -                          | -        |

|                 |               |      |   |   |
|-----------------|---------------|------|---|---|
| SPV cluster 038 | Cf fatty acid | 1032 | - | - |
| SPV cluster 039 | Cf fatty acid | 1242 | - | - |
| SPV cluster 042 | Cf fatty acid | 1281 | - | - |
| SPV cluster 043 | Cf fatty acid | 1212 | - | - |
| SPV cluster 045 | Cf fatty acid | 1269 | - | - |
| SPV cluster 046 | Cf fatty acid | 1170 | - | - |
| SPV cluster 053 | Cf fatty acid | 1263 | - | - |
| SPV cluster 054 | Cf fatty acid | 1239 | - | - |
| SPV cluster 060 | Cf fatty acid | 1239 | - | - |
| SPV cluster 066 | Cf fatty acid | 1254 | - | - |
| SPV cluster 069 | Cf fatty acid | 1242 | - | - |
| SPV cluster 073 | Cf fatty acid | 1119 | - | - |
| SPV cluster 074 | Cf fatty acid | 1269 | - | - |
| SPV cluster 076 | Cf fatty acid | 1236 | - | - |
| SPV cluster 081 | Cf fatty acid | 1248 | - | - |
| SPV cluster 083 | Cf fatty acid | 1287 | - | - |
| SPV cluster 085 | Cf fatty acid | 1248 | - | - |
| SPV cluster 086 | Cf fatty acid | 1182 | - | - |
| SPV cluster 093 | Cf fatty acid | 1185 | - | - |
| SPV cluster 099 | Cf fatty acid | 1236 | - | - |
| SPV cluster 101 | Cf fatty acid | 1269 | - | - |
| SPV cluster 107 | Cf fatty acid | 1278 | - | - |
| SPV cluster 109 | Cf fatty acid | 1008 | - | - |
| SPV cluster 113 | Cf fatty acid | 1188 | - | - |
| SPV cluster 119 | Cf fatty acid | 1584 | - | - |
| SPV cluster 121 | Cf fatty acid | 1239 | - | - |
| SPV cluster 122 | Cf fatty acid | 1005 | - | - |
| SPV cluster 124 | Cf fatty acid | 1374 | - | - |
| SPV cluster 126 | Cf fatty acid | 1209 | - | - |
| SPV cluster 128 | Cf fatty acid | 1239 | - | - |
| SPV cluster 129 | Cf fatty acid | 1176 | - | - |
| SPV cluster 130 | Cf fatty acid | 1005 | - | - |
| SPV cluster 133 | Cf fatty acid | 1071 | - | - |
| SPV cluster 145 | Cf fatty acid | 1854 | - | - |
| SPV cluster 148 | Cf fatty acid | 1218 | - | - |
| SPV cluster 152 | Cf fatty acid | 1227 | - | - |
| SPV cluster 155 | Cf fatty acid | 1224 | - | - |
| SPV cluster 159 | Cf fatty acid | 1251 | - | - |
| SPV cluster 160 | Cf fatty acid | 1263 | - | - |
| SPV cluster 162 | Cf fatty acid | 1050 | - | - |
| SPV cluster 173 | Cf fatty acid | 1266 | - | - |
| SPV cluster 178 | Cf fatty acid | 1257 | - | - |
| SPV cluster 179 | Cf fatty acid | 1182 | - | - |

|                 |               |      |   |   |
|-----------------|---------------|------|---|---|
| SPV cluster 180 | Cf fatty acid | 1236 | - | - |
| SPV cluster 182 | Cf fatty acid | 1242 | - | - |
| SPV cluster 189 | Cf fatty acid | 1101 | - | - |
| SPV cluster 192 | Cf fatty acid | 1266 | - | - |
| SPV cluster 195 | Cf fatty acid | 1242 | - | - |
| SPV cluster 197 | Cf fatty acid | 1239 | - | - |
| SPV cluster 200 | Cf fatty acid | 1287 | - | - |
| SPV cluster 201 | Cf fatty acid | 1293 | - | - |
| SPV cluster 205 | Cf fatty acid | 1278 | - | - |
| SPV cluster 207 | Cf fatty acid | 1236 | - | - |
| SPV cluster 209 | Cf fatty acid | 1239 | - | - |
| SPV cluster 215 | Cf fatty acid | 1227 | - | - |
| SPV cluster 216 | Cf fatty acid | 1284 | - | - |
| SPV cluster 217 | Cf fatty acid | 1245 | - | - |
| SPV cluster 219 | Cf fatty acid | 1011 | - | - |
| SPV cluster 222 | Cf fatty acid | 1251 | - | - |
| SPV cluster 224 | Cf fatty acid | 1188 | - | - |
| SPV cluster 228 | Cf fatty acid | 1215 | - | - |
| SPV cluster 229 | Cf fatty acid | 1206 | - | - |
| SPV cluster 230 | Cf fatty acid | 1227 | - | - |
| SPV cluster 233 | Cf fatty acid | 1236 | - | - |
| SPV cluster 235 | Cf fatty acid | 1242 | - | - |
| SPV cluster 236 | Cf fatty acid | 1206 | - | - |
| SPV cluster 239 | Cf fatty acid | 1236 | - | - |
| SPV cluster 240 | Cf fatty acid | 1251 | - | - |
| SPV cluster 243 | Cf fatty acid | 1989 | - | - |
| SPV cluster 250 | Cf fatty acid | 1266 | - | - |
| SPV cluster 251 | Cf fatty acid | 1245 | - | - |
| SPV cluster 254 | Cf fatty acid | 1242 | - | - |
| SPV cluster 255 | Cf fatty acid | 1242 | - | - |
| SPV cluster 256 | Cf fatty acid | 1059 | - | - |
| SPV cluster 258 | Cf fatty acid | 1248 | - | - |
| SPV cluster 259 | Cf fatty acid | 1272 | - | - |
| SPV cluster 261 | Cf fatty acid | 1578 | - | - |
| SPV cluster 262 | Cf fatty acid | 1074 | - | - |
| SPV cluster 263 | Cf fatty acid | 1242 | - | - |
| SPV cluster 271 | Cf fatty acid | 1254 | - | - |
| SPV cluster 274 | Cf fatty acid | 1242 | - | - |
| SPV cluster 275 | Cf fatty acid | 1275 | - | - |
| SPV cluster 276 | Cf fatty acid | 1260 | - | - |
| SPV cluster 279 | Cf fatty acid | 1098 | - | - |
| SPV cluster 280 | Cf fatty acid | 1239 | - | - |
| SPV cluster 284 | Cf fatty acid | 1242 | - | - |

|                 |               |      |   |   |
|-----------------|---------------|------|---|---|
| SPV cluster 285 | Cf fatty acid | 1053 | - | - |
| SPV cluster 289 | Cf fatty acid | 1242 | - | - |
| SPV cluster 290 | Cf fatty acid | 1185 | - | - |
| SPV cluster 293 | Cf fatty acid | 1218 | - | - |
| SPV cluster 296 | Cf fatty acid | 1116 | - | - |
| SPV cluster 301 | Cf fatty acid | 1278 | - | - |
| SPV cluster 307 | Cf fatty acid | 1227 | - | - |
| SPV cluster 308 | Cf fatty acid | 1272 | - | - |
| SPV cluster 313 | Cf fatty acid | 1011 | - | - |
| SPV cluster 316 | Cf fatty acid | 1242 | - | - |
| SPV cluster 317 | Cf fatty acid | 1251 | - | - |
| SPV cluster 318 | Cf fatty acid | 1053 | - | - |
| SPV cluster 320 | Cf fatty acid | 1188 | - | - |
| SPV cluster 322 | Cf fatty acid | 1110 | - | - |
| SPV cluster 324 | Cf fatty acid | 1239 | - | - |
| SPV cluster 329 | Cf fatty acid | 1242 | - | - |
| SPV cluster 330 | Cf fatty acid | 1035 | - | - |
| SPV cluster 334 | Cf fatty acid | 1263 | - | - |
| SPV cluster 337 | Cf fatty acid | 1149 | - | - |
| SPV cluster 339 | Cf fatty acid | 1260 | - | - |
| SPV cluster 340 | Cf fatty acid | 1272 | - | - |
| SPV cluster 341 | Cf fatty acid | 1263 | - | - |
| SPV cluster 349 | Cf fatty acid | 1113 | - | - |
| SPV cluster 352 | Cf fatty acid | 1062 | - | - |
| SPV cluster 353 | Cf fatty acid | 1254 | - | - |
| SPV cluster 354 | Cf fatty acid | 1095 | - | - |
| SPV cluster 358 | Cf fatty acid | 1008 | - | - |
| SPV cluster 359 | Cf fatty acid | 1062 | - | - |
| SPV cluster 362 | Cf fatty acid | 1284 | - | - |
| SPV cluster 363 | Cf fatty acid | 1257 | - | - |
| SPV cluster 364 | Cf fatty acid | 1263 | - | - |
| SPV cluster 366 | Cf fatty acid | 1221 | - | - |
| SPV cluster 367 | Cf fatty acid | 1263 | - | - |
| SPV cluster 375 | Cf fatty acid | 1218 | - | - |
| SPV cluster 379 | Cf fatty acid | 1098 | - | - |
| SPV cluster 389 | Cf fatty acid | 1242 | - | - |
| SPV cluster 400 | Cf fatty acid | 1254 | - | - |
| SPV cluster 401 | Cf fatty acid | 1227 | - | - |
| SPV cluster 402 | Cf fatty acid | 1254 | - | - |
| SPV cluster 403 | Cf fatty acid | 1089 | - | - |
| SPV cluster 406 | Cf fatty acid | 1092 | - | - |
| SPV cluster 408 | Cf fatty acid | 1293 | - | - |
| SPV cluster 410 | Cf fatty acid | 1077 | - | - |

|                 |               |      |   |   |
|-----------------|---------------|------|---|---|
| SPV cluster 411 | Cf fatty acid | 1089 | - | - |
| SPV cluster 414 | Cf fatty acid | 1227 | - | - |
| SPV cluster 416 | Cf fatty acid | 1212 | - | - |
| SPV cluster 417 | Cf fatty acid | 1239 | - | - |
| SPV cluster 419 | Cf fatty acid | 1251 | - | - |
| SPV cluster 423 | Cf fatty acid | 1146 | - | - |
| SPV cluster 430 | Cf fatty acid | 1233 | - | - |
| SPV cluster 432 | Cf fatty acid | 1041 | - | - |
| SPV cluster 433 | Cf fatty acid | 1314 | - | - |
| SPV cluster 436 | Cf fatty acid | 1176 | - | - |
| SPV cluster 438 | Cf fatty acid | 1071 | - | - |
| SPV cluster 441 | Cf fatty acid | 1251 | - | - |
| SPV cluster 442 | Cf fatty acid | 1191 | - | - |
| SPV cluster 443 | Cf fatty acid | 1092 | - | - |
| SPV cluster 444 | Cf fatty acid | 1125 | - | - |
| SPV cluster 445 | Cf fatty acid | 1245 | - | - |
| SPV cluster 461 | Cf fatty acid | 1017 | - | - |
| SPV cluster 092 | Ladderane     | 1260 | - | - |
| SPV cluster 125 | Ladderane     | 1239 | - | - |
| SPV cluster 044 | Lantipeptide  | 3168 | - | - |
| SPV cluster 061 | Lantipeptide  | 2718 | - | - |
| SPV cluster 365 | Lantipeptide  | 2688 | - | - |
| SPV cluster 012 | Other         | 4239 | - | - |
| SPV cluster 017 | Other         | 3618 | - | - |
| SPV cluster 018 | Other         | 4284 | - | - |
| SPV cluster 022 | Other         | 3084 | - | - |
| SPV cluster 068 | Other         | 2793 | - | - |
| SPV cluster 088 | Other         | 2586 | - | - |
| SPV cluster 097 | Other         | 2871 | - | - |
| SPV cluster 098 | Other         | 4452 | - | - |
| SPV cluster 104 | Other         | 4272 | - | - |
| SPV cluster 117 | Other         | 2064 | - | - |
| SPV cluster 132 | Other         | 4272 | - | - |
| SPV cluster 157 | Other         | 2943 | - | - |
| SPV cluster 165 | Other         | 2676 | - | - |
| SPV cluster 185 | Other         | 2910 | - | - |
| SPV cluster 193 | Other         | 2787 | - | - |
| SPV cluster 238 | Other         | 4326 | - | - |
| SPV cluster 252 | Other         | 4371 | - | - |
| SPV cluster 265 | Other         | 2802 | - | - |
| SPV cluster 267 | Other         | 3087 | - | - |
| SPV cluster 270 | Other         | 1983 | - | - |
| SPV cluster 277 | Other         | 2247 | - | - |

|                 |             |      |   |   |
|-----------------|-------------|------|---|---|
| SPV cluster 283 | Other       | 1527 | - | - |
| SPV cluster 294 | Other       | 2898 | - | - |
| SPV cluster 295 | Other       | 3534 | - | - |
| SPV cluster 342 | Other       | 2556 | - | - |
| SPV cluster 343 | Other       | 2574 | - | - |
| SPV cluster 344 | Other       | 1740 | - | - |
| SPV cluster 361 | Other       | 1389 | - | - |
| SPV cluster 369 | Other       | 1023 | - | - |
| SPV cluster 392 | Other       | 2340 | - | - |
| SPV cluster 393 | Other       | 1896 | - | - |
| SPV cluster 407 | Other       | 2016 | - | - |
| SPV cluster 420 | Other       | 2049 | - | - |
| SPV cluster 437 | Other       | 1557 | - | - |
| SPV cluster 449 | Other       | 1347 | - | - |
| SPV cluster 089 | Phosphonate | 1680 | - | - |
| SPV cluster 158 | Phosphonate | 1629 | - | - |
| SPV cluster 170 | Phosphonate | 1626 | - | - |
| SPV cluster 319 | Phosphonate | 1635 | - | - |
| SPV cluster 335 | Phosphonate | 1479 | - | - |
| SPV cluster 452 | Phosphonate | 1284 | - | - |
| SPV cluster 004 | Terpene     | 3408 | - | - |
| SPV cluster 006 | Terpene     | 1035 | - | - |
| SPV cluster 010 | Terpene     | 1059 | - | - |
| SPV cluster 011 | Terpene     | 3462 | - | - |
| SPV cluster 013 | Terpene     | 1824 | - | - |
| SPV cluster 019 | Terpene     | 1083 | - | - |
| SPV cluster 023 | Terpene     | 1719 | - | - |
| SPV cluster 041 | Terpene     | 1719 | - | - |
| SPV cluster 048 | Terpene     | 1074 | - | - |
| SPV cluster 050 | Terpene     | 2079 | - | - |
| SPV cluster 055 | Terpene     | 1035 | - | - |
| SPV cluster 056 | Terpene     | 1044 | - | - |
| SPV cluster 058 | Terpene     | 2004 | - | - |
| SPV cluster 059 | Terpene     | 1050 | - | - |
| SPV cluster 062 | Terpene     | 1062 | - | - |
| SPV cluster 063 | Terpene     | 1068 | - | - |
| SPV cluster 070 | Terpene     | 1047 | - | - |
| SPV cluster 072 | Terpene     | 2166 | - | - |
| SPV cluster 075 | Terpene     | 1917 | - | - |
| SPV cluster 077 | Terpene     | 1737 | - | - |
| SPV cluster 079 | Terpene     | 2022 | - | - |
| SPV cluster 080 | Terpene     | 1011 | - | - |
| SPV cluster 087 | Terpene     | 1962 | - | - |

|                 |         |      |   |   |
|-----------------|---------|------|---|---|
| SPV cluster 095 | Terpene | 1692 | - | - |
| SPV cluster 100 | Terpene | 1974 | - | - |
| SPV cluster 103 | Terpene | 1098 | - | - |
| SPV cluster 105 | Terpene | 2016 | - | - |
| SPV cluster 110 | Terpene | 1023 | - | - |
| SPV cluster 116 | Terpene | 1071 | - | - |
| SPV cluster 118 | Terpene | 3405 | - | - |
| SPV cluster 120 | Terpene | 1068 | - | - |
| SPV cluster 127 | Terpene | 1704 | - | - |
| SPV cluster 140 | Terpene | 3393 | - | - |
| SPV cluster 142 | Terpene | 1068 | - | - |
| SPV cluster 143 | Terpene | 1041 | - | - |
| SPV cluster 144 | Terpene | 1020 | - | - |
| SPV cluster 147 | Terpene | 2010 | - | - |
| SPV cluster 156 | Terpene | 1068 | - | - |
| SPV cluster 164 | Terpene | 1068 | - | - |
| SPV cluster 175 | Terpene | 2031 | - | - |
| SPV cluster 177 | Terpene | 1179 | - | - |
| SPV cluster 183 | Terpene | 1047 | - | - |
| SPV cluster 184 | Terpene | 1047 | - | - |
| SPV cluster 186 | Terpene | 1260 | - | - |
| SPV cluster 187 | Terpene | 1047 | - | - |
| SPV cluster 188 | Terpene | 1095 | - | - |
| SPV cluster 190 | Terpene | 3228 | - | - |
| SPV cluster 196 | Terpene | 3426 | - | - |
| SPV cluster 203 | Terpene | 1068 | - | - |
| SPV cluster 223 | Terpene | 1050 | - | - |
| SPV cluster 231 | Terpene | 3405 | - | - |
| SPV cluster 232 | Terpene | 3357 | - | - |
| SPV cluster 234 | Terpene | 1041 | - | - |
| SPV cluster 242 | Terpene | 1935 | - | - |
| SPV cluster 244 | Terpene | 1992 | - | - |
| SPV cluster 247 | Terpene | 1017 | - | - |
| SPV cluster 248 | Terpene | 2139 | - | - |
| SPV cluster 249 | Terpene | 2001 | - | - |
| SPV cluster 257 | Terpene | 1050 | - | - |
| SPV cluster 272 | Terpene | 1995 | - | - |
| SPV cluster 282 | Terpene | 2028 | - | - |
| SPV cluster 286 | Terpene | 1935 | - | - |
| SPV cluster 288 | Terpene | 3348 | - | - |
| SPV cluster 298 | Terpene | 1473 | - | - |
| SPV cluster 303 | Terpene | 1716 | - | - |
| SPV cluster 304 | Terpene | 2037 | - | - |



|                 |                       |       |   |   |
|-----------------|-----------------------|-------|---|---|
| SPV cluster 321 | Terpene               | 1887  | - | - |
| SPV cluster 325 | Terpene               | 1995  | - | - |
| SPV cluster 327 | Terpene               | 3501  | - | - |
| SPV cluster 328 | Terpene               | 1353  | - | - |
| SPV cluster 331 | Terpene               | 1716  | - | - |
| SPV cluster 332 | Terpene               | 1050  | - | - |
| SPV cluster 336 | Terpene               | 1701  | - | - |
| SPV cluster 351 | Terpene               | 1068  | - | - |
| SPV cluster 370 | Terpene               | 1119  | - | - |
| SPV cluster 372 | Terpene               | 1674  | - | - |
| SPV cluster 374 | Terpene               | 2211  | - | - |
| SPV cluster 381 | Terpene               | 1134  | - | - |
| SPV cluster 383 | Terpene               | 1116  | - | - |
| SPV cluster 385 | Terpene               | 2850  | - | - |
| SPV cluster 387 | Terpene               | 2148  | - | - |
| SPV cluster 388 | Terpene               | 1926  | - | - |
| SPV cluster 390 | Terpene               | 1599  | - | - |
| SPV cluster 395 | Terpene               | 1098  | - | - |
| SPV cluster 397 | Terpene               | 1680  | - | - |
| SPV cluster 399 | Terpene               | 1212  | - | - |
| SPV cluster 409 | Terpene               | 1602  | - | - |
| SPV cluster 415 | Terpene               | 1569  | - | - |
| SPV cluster 427 | Terpene               | 1578  | - | - |
| SPV cluster 429 | Terpene               | 1629  | - | - |
| SPV cluster 434 | Terpene               | 1386  | - | - |
| SPV cluster 435 | Terpene               | 1473  | - | - |
| SPV cluster 439 | Terpene               | 1317  | - | - |
| SPV cluster 453 | Terpene               | 1194  | - | - |
| SPV cluster 458 | Terpene               | 1116  | - | - |
| SPV cluster 462 | Terpene               | 1113  | - | - |
| SPV cluster 463 | Terpene               | 1104  | - | - |
| SPV cluster 051 | Transatpks-Type I PKS | 9711  | - | - |
| SPV cluster 115 | Transatpks-Type I PKS | 9690  | - | - |
| SPV cluster 001 | Type I PKS            | 6555  | - | - |
| SPV cluster 005 | Type I PKS            | 10242 | - | - |
| SPV cluster 008 | Type I PKS            | 10932 | - | - |
| SPV cluster 020 | Type I PKS            | 10269 | - | - |
| SPV cluster 029 | Type I PKS            | 22494 | - | - |
| SPV cluster 030 | Type I PKS            | 66639 | - | - |
| SPV cluster 035 | Type I PKS            | 9531  | - | - |
| SPV cluster 040 | Type I PKS            | 10272 | - | - |
| SPV cluster 047 | Type I PKS            | 10278 | - | - |
| SPV cluster 049 | Type I PKS            | 7140  | - | - |

|                 |            |       |   |   |
|-----------------|------------|-------|---|---|
| SPV cluster 052 | Type I PKS | 10341 | - | - |
| SPV cluster 057 | Type I PKS | 10272 | - | - |
| SPV cluster 065 | Type I PKS | 7008  | - | - |
| SPV cluster 067 | Type I PKS | 7200  | - | - |
| SPV cluster 071 | Type I PKS | 10014 | - | - |
| SPV cluster 078 | Type I PKS | 10257 | - | - |
| SPV cluster 082 | Type I PKS | 9732  | - | - |
| SPV cluster 084 | Type I PKS | 9597  | - | - |
| SPV cluster 091 | Type I PKS | 3741  | - | - |
| SPV cluster 096 | Type I PKS | 10149 | - | - |
| SPV cluster 102 | Type I PKS | 10395 | - | - |
| SPV cluster 106 | Type I PKS | 18342 | - | - |
| SPV cluster 108 | Type I PKS | 7059  | - | - |
| SPV cluster 111 | Type I PKS | 1602  | - | - |
| SPV cluster 114 | Type I PKS | 10290 | - | - |
| SPV cluster 134 | Type I PKS | 10272 | - | - |
| SPV cluster 141 | Type I PKS | 7053  | - | - |
| SPV cluster 146 | Type I PKS | 10323 | - | - |
| SPV cluster 149 | Type I PKS | 9012  | - | - |
| SPV cluster 150 | Type I PKS | 9024  | - | - |
| SPV cluster 151 | Type I PKS | 10374 | - | - |
| SPV cluster 153 | Type I PKS | 7068  | - | - |
| SPV cluster 154 | Type I PKS | 10290 | - | - |
| SPV cluster 161 | Type I PKS | 7068  | - | - |
| SPV cluster 163 | Type I PKS | 7017  | - | - |
| SPV cluster 166 | Type I PKS | 7068  | - | - |
| SPV cluster 167 | Type I PKS | 4179  | - | - |
| SPV cluster 168 | Type I PKS | 9810  | - | - |
| SPV cluster 169 | Type I PKS | 14874 | - | - |
| SPV cluster 171 | Type I PKS | 10275 | - | - |
| SPV cluster 172 | Type I PKS | 7176  | - | - |
| SPV cluster 174 | Type I PKS | 10344 | - | - |
| SPV cluster 181 | Type I PKS | 8808  | - | - |
| SPV cluster 191 | Type I PKS | 9558  | - | - |
| SPV cluster 194 | Type I PKS | 6999  | - | - |
| SPV cluster 202 | Type I PKS | 2454  | - | - |
| SPV cluster 204 | Type I PKS | 6495  | - | - |
| SPV cluster 206 | Type I PKS | 6789  | - | - |
| SPV cluster 208 | Type I PKS | 5577  | - | - |
| SPV cluster 210 | Type I PKS | 7722  | - | - |
| SPV cluster 211 | Type I PKS | 5358  | - | - |
| SPV cluster 212 | Type I PKS | 7938  | - | - |
| SPV cluster 213 | Type I PKS | 7770  | - | - |

|                 |            |       |   |   |
|-----------------|------------|-------|---|---|
| SPV cluster 214 | Type I PKS | 10272 | - | - |
| SPV cluster 220 | Type I PKS | 7098  | - | - |
| SPV cluster 221 | Type I PKS | 9519  | - | - |
| SPV cluster 225 | Type I PKS | 1842  | - | - |
| SPV cluster 226 | Type I PKS | 6498  | - | - |
| SPV cluster 227 | Type I PKS | 5679  | - | - |
| SPV cluster 237 | Type I PKS | 10971 | - | - |
| SPV cluster 241 | Type I PKS | 9267  | - | - |
| SPV cluster 245 | Type I PKS | 10314 | - | - |
| SPV cluster 246 | Type I PKS | 10095 | - | - |
| SPV cluster 253 | Type I PKS | 2619  | - | - |
| SPV cluster 260 | Type I PKS | 4767  | - | - |
| SPV cluster 264 | Type I PKS | 7161  | - | - |
| SPV cluster 266 | Type I PKS | 4014  | - | - |
| SPV cluster 268 | Type I PKS | 4956  | - | - |
| SPV cluster 269 | Type I PKS | 3126  | - | - |
| SPV cluster 273 | Type I PKS | 2433  | - | - |
| SPV cluster 278 | Type I PKS | 3573  | - | - |
| SPV cluster 281 | Type I PKS | 4620  | - | - |
| SPV cluster 287 | Type I PKS | 1602  | - | - |
| SPV cluster 291 | Type I PKS | 2580  | - | - |
| SPV cluster 292 | Type I PKS | 2121  | - | - |
| SPV cluster 299 | Type I PKS | 3537  | - | - |
| SPV cluster 300 | Type I PKS | 2034  | - | - |
| SPV cluster 302 | Type I PKS | 2016  | - | - |
| SPV cluster 305 | Type I PKS | 3834  | - | - |
| SPV cluster 306 | Type I PKS | 5826  | - | - |
| SPV cluster 309 | Type I PKS | 3051  | - | - |
| SPV cluster 310 | Type I PKS | 4779  | - | - |
| SPV cluster 311 | Type I PKS | 4293  | - | - |
| SPV cluster 314 | Type I PKS | 5205  | - | - |
| SPV cluster 315 | Type I PKS | 3672  | - | - |
| SPV cluster 323 | Type I PKS | 5337  | - | - |
| SPV cluster 326 | Type I PKS | 5010  | - | - |
| SPV cluster 333 | Type I PKS | 4863  | - | - |
| SPV cluster 338 | Type I PKS | 2817  | - | - |
| SPV cluster 347 | Type I PKS | 4140  | - | - |
| SPV cluster 348 | Type I PKS | 4137  | - | - |
| SPV cluster 356 | Type I PKS | 3888  | - | - |
| SPV cluster 357 | Type I PKS | 2904  | - | - |
| SPV cluster 360 | Type I PKS | 1842  | - | - |
| SPV cluster 368 | Type I PKS | 3276  | - | - |
| SPV cluster 371 | Type I PKS | 3120  | - | - |

|                 |              |      |   |   |
|-----------------|--------------|------|---|---|
| SPV cluster 373 | Type I PKS   | 2307 | - | - |
| SPV cluster 377 | Type I PKS   | 3108 | - | - |
| SPV cluster 378 | Type I PKS   | 3069 | - | - |
| SPV cluster 382 | Type I PKS   | 2985 | - | - |
| SPV cluster 384 | Type I PKS   | 2238 | - | - |
| SPV cluster 386 | Type I PKS   | 2808 | - | - |
| SPV cluster 391 | Type I PKS   | 2721 | - | - |
| SPV cluster 394 | Type I PKS   | 2664 | - | - |
| SPV cluster 396 | Type I PKS   | 2610 | - | - |
| SPV cluster 405 | Type I PKS   | 2376 | - | - |
| SPV cluster 412 | Type I PKS   | 2337 | - | - |
| SPV cluster 413 | Type I PKS   | 2286 | - | - |
| SPV cluster 418 | Type I PKS   | 2148 | - | - |
| SPV cluster 421 | Type I PKS   | 2010 | - | - |
| SPV cluster 422 | Type I PKS   | 1977 | - | - |
| SPV cluster 425 | Type I PKS   | 1851 | - | - |
| SPV cluster 426 | Type I PKS   | 1839 | - | - |
| SPV cluster 428 | Type I PKS   | 1809 | - | - |
| SPV cluster 440 | Type I PKS   | 1503 | - | - |
| SPV cluster 446 | Type I PKS   | 1365 | - | - |
| SPV cluster 447 | Type I PKS   | 1359 | - | - |
| SPV cluster 448 | Type I PKS   | 1347 | - | - |
| SPV cluster 450 | Type I PKS   | 1323 | - | - |
| SPV cluster 451 | Type I PKS   | 1314 | - | - |
| SPV cluster 454 | Type I PKS   | 1251 | - | - |
| SPV cluster 455 | Type I PKS   | 1218 | - | - |
| SPV cluster 456 | Type I PKS   | 1218 | - | - |
| SPV cluster 457 | Type I PKS   | 1203 | - | - |
| SPV cluster 459 | Type I PKS   | 1200 | - | - |
| SPV cluster 380 | Type II PKS  | 1248 | - | - |
| SPV cluster 090 | Type III PKS | 1056 | - | - |
| SPV cluster 131 | Type III PKS | 1056 | - | - |
| SPV cluster 218 | Type III PKS | 1086 | - | - |
| SPV cluster 404 | Type III PKS | 1086 | - | - |
| SPV cluster 460 | Type III PKS | 1098 | - | - |

“-”: no significant hit

Table S5. BLAST search of the KS sequences from the metagenome of *C. reinwardti* against the KS sequences of known products from the NaPDos database

| KS ID  | Length (nt) | BGC ID          | Identity (%) | Aligned length (aa) | E-value   | NaPDos ID         | Pathway product |
|--------|-------------|-----------------|--------------|---------------------|-----------|-------------------|-----------------|
| KS_013 | 792         | CLR_cluster_248 | 53           | 260                 | 2.00E-77  | EpoD_Q9L8C7_2mod  | Epothilone      |
| KS_029 | 1194        | CLR_cluster_183 | 50           | 406                 | 3.00E-103 | EpoD_Q9L8C7_4mod  | Epothilone      |
| KS_030 | 792         | CLR_cluster_249 | 53           | 260                 | 2.00E-73  | EpoD_Q9L8C7_2mod  | Epothilone      |
| KS_032 | 327         | CLR_cluster_265 | 45           | 114                 | 2.00E-20  | VirA_BAF50727_4T  | Virginiamycin   |
| KS_039 | 1269        | CLR_cluster_225 | 52           | 421                 | 4.00E-99  | EpoD_Q9L8C7_4mod  | Epothilone      |
| KS_041 | 975         | CLR_cluster_202 | 51           | 320                 | 2.00E-85  | AveA2_Q9S0R7_3mod | Avermectin      |
| KS_044 | 363         | CLR_cluster_181 | 53           | 119                 | 2.00E-36  | EpoD_Q9L8C7_4mod  | Epothilone      |
| KS_061 | 1113        | CLR_cluster_192 | 53           | 367                 | 2.00E-107 | EpoD_Q9L8C7_2mod  | Epothilone      |
| KS_064 | 1221        | CLR_cluster_021 | 56           | 413                 | 5.00E-113 | EpoD_Q9L8C7_4mod  | Epothilone      |
| KS_066 | 702         | CLR_cluster_246 | 55           | 231                 | 7.00E-70  | EpoD_Q9L8C7_4mod  | Epothilone      |
| KS_073 | 1112        | CLR_cluster_222 | 52           | 369                 | 9.00E-106 | EpoF_Q9L8C5_1mod  | Epothilone      |
| KS_078 | 1064        | CLR_cluster_252 | 56           | 353                 | 1.00E-111 | FabF_Bacillus_FAS | Fatty acid      |
| KS_079 | 713         | CLR_cluster_062 | 42           | 224                 | 1.00E-44  | TetA_BAE93722_KS1 | Tetronomycin    |
| KS_084 | 977         | CLR_cluster_279 | 32           | 221                 | 5.00E-24  | FabF_Bacillus_FAS | Fatty acid      |
| KS_095 | 1049        | CLR_cluster_281 | 58           | 350                 | 1.00E-117 | FabF_Ecoli_FAS    | Fatty acid      |
| KS_101 | 1100        | CLR_cluster_081 | 41           | 267                 | 1.00E-42  | FabF_Ecoli_FAS    | Fatty acid      |
| KS_102 | 1097        | CLR_cluster_105 | 32           | 392                 | 3.00E-43  | FabF_Bacillus_FAS | Fatty acid      |
| KS_105 | 1223        | CLR_cluster_122 | 53           | 409                 | 6.00E-122 | FabF_Bacillus_FAS | Fatty acid      |
| KS_106 | 1223        | CLR_cluster_041 | 52           | 408                 | 3.00E-120 | FabF_Bacillus_FAS | Fatty acid      |
| KS_111 | 1223        | CLR_cluster_006 | 62           | 407                 | 8.00E-138 | FabF_Ecoli_FAS    | Fatty acid      |
| KS_115 | 1223        | CLR_cluster_007 | 53           | 407                 | 3.00E-114 | FabF_Bacillus_FAS | Fatty acid      |
| KS_116 | 1202        | CLR_cluster_110 | 62           | 400                 | 1.00E-141 | FabB_Ecoli_FAS    | Fatty acid      |
| KS_117 | 1250        | CLR_cluster_086 | 53           | 413                 | 9.00E-108 | FabF_Bacillus_FAS | Fatty acid      |
| KS_120 | 1226        | CLR_cluster_193 | 51           | 408                 | 2.00E-105 | FabF_Bacillus_FAS | Fatty acid      |
| KS_126 | 1184        | CLR_cluster_230 | 58           | 398                 | 1.00E-128 | FabB_Ecoli_FAS    | Fatty acid      |
| KS_134 | 1199        | CLR_cluster_253 | 40           | 404                 | 1.00E-86  | FabF_Bacillus_FAS | Fatty acid      |
| KS_138 | 1223        | CLR_cluster_097 | 53           | 408                 | 2.00E-118 | FabF_Bacillus_FAS | Fatty acid      |
| KS_142 | 1208        | CLR_cluster_126 | 64           | 405                 | 8.00E-134 | FabB_Ecoli_FAS    | Fatty acid      |

|        |      |                 |    |     |           |                   |            |
|--------|------|-----------------|----|-----|-----------|-------------------|------------|
| KS 146 | 1223 | CLR_cluster_082 | 61 | 407 | 1.00E-132 | FabF_Ecoli_FAS    | Fatty acid |
| KS 150 | 1196 | CLR_cluster_127 | 63 | 402 | 2.00E-117 | FabB_Ecoli_FAS    | Fatty acid |
| KS 154 | 1223 | CLR_cluster_013 | 58 | 407 | 6.00E-140 | FabF_Bacillus_FAS | Fatty acid |
| KS 159 | 1223 | CLR_cluster_101 | 53 | 408 | 3.00E-113 | FabF_Bacillus_FAS | Fatty acid |
| KS 163 | 1229 | CLR_cluster_065 | 54 | 410 | 7.00E-110 | FabF_Bacillus_FAS | Fatty acid |
| KS 170 | 1217 | CLR_cluster_085 | 51 | 407 | 1.00E-123 | FabF_Bacillus_FAS | Fatty acid |
| KS 179 | 1202 | CLR_cluster_257 | 60 | 402 | 1.00E-125 | FabB_Ecoli_FAS    | Fatty acid |
| KS 183 | 1223 | CLR_cluster_165 | 54 | 407 | 5.00E-122 | FabF_Bacillus_FAS | Fatty acid |
| KS 196 | 1280 | CLR_cluster_139 | 27 | 434 | 2.00E-25  | FabF_Ecoli_FAS    | Fatty acid |
| KS 198 | 1223 | CLR_cluster_001 | 61 | 408 | 2.00E-117 | FabF_Ecoli_FAS    | Fatty acid |
| KS 199 | 1157 | CLR_cluster_264 | 43 | 406 | 7.00E-72  | FabF_Bacillus_FAS | Fatty acid |
| KS 201 | 1226 | CLR_cluster_022 | 51 | 408 | 2.00E-114 | FabF_Bacillus_FAS | Fatty acid |
| KS 204 | 1163 | CLR_cluster_064 | 61 | 383 | 2.00E-119 | FabF_Ecoli_FAS    | Fatty acid |
| KS 206 | 1226 | CLR_cluster_143 | 56 | 408 | 1.00E-113 | FabF_Ecoli_FAS    | Fatty acid |
| KS 208 | 1223 | CLR_cluster_179 | 56 | 405 | 6.00E-111 | FabF_Bacillus_FAS | Fatty acid |
| KS 212 | 1217 | CLR_cluster_190 | 51 | 407 | 1.00E-123 | FabF_Bacillus_FAS | Fatty acid |
| KS 217 | 1217 | CLR_cluster_015 | 62 | 405 | 3.00E-139 | FabF_Ecoli_FAS    | Fatty acid |
| KS 221 | 1064 | CLR_cluster_102 | 46 | 272 | 1.00E-57  | FabF_Ecoli_FAS    | Fatty acid |
| KS 222 | 1229 | CLR_cluster_134 | 46 | 411 | 3.00E-80  | FabF_Bacillus_FAS | Fatty acid |
| KS 227 | 1217 | CLR_cluster_220 | 59 | 406 | 3.00E-134 | FabF_Ecoli_FAS    | Fatty acid |
| KS 231 | 1217 | CLR_cluster_049 | 61 | 407 | 9.00E-135 | FabF_Ecoli_FAS    | Fatty acid |
| KS 232 | 1223 | CLR_cluster_224 | 60 | 407 | 3.00E-135 | FabF_Ecoli_FAS    | Fatty acid |
| KS 239 | 1226 | CLR_cluster_166 | 57 | 408 | 3.00E-114 | FabF_Ecoli_FAS    | Fatty acid |
| KS 247 | 1223 | CLR_cluster_162 | 61 | 407 | 6.00E-127 | FabF_Ecoli_FAS    | Fatty acid |
| KS 250 | 1340 | CLR_cluster_014 | 49 | 451 | 1.00E-89  | EpoE_Q9L8C6_1mod  | Epothilone |
| KS 253 | 1229 | CLR_cluster_228 | 51 | 409 | 1.00E-114 | FabF_Bacillus_FAS | Fatty acid |
| KS 262 | 1220 | CLR_cluster_045 | 55 | 406 | 5.00E-122 | FabF_Bacillus_FAS | Fatty acid |
| KS 263 | 1292 | CLR_cluster_076 | 39 | 443 | 1.00E-69  | EpoD_Q9L8C7_2mod  | Epothilone |
| KS 266 | 1151 | CLR_cluster_140 | 44 | 405 | 9.00E-76  | FabF_Bacillus_FAS | Fatty acid |
| KS 279 | 1229 | CLR_cluster_147 | 55 | 409 | 1.00E-119 | FabF_Bacillus_FAS | Fatty acid |
| KS 283 | 1286 | CLR_cluster_131 | 52 | 423 | 4.00E-118 | EpoD_Q9L8C7_4mod  | Epothilone |
| KS 284 | 1292 | CLR_cluster_108 | 37 | 438 | 2.00E-67  | EpoD_Q9L8C7_2mod  | Epothilone |

|        |      |                 |    |     |           |                   |                                      |
|--------|------|-----------------|----|-----|-----------|-------------------|--------------------------------------|
| KS 294 | 1223 | CLR_cluster_060 | 55 | 407 | 5.00E-132 | FabF_Bacillus_FAS | Fatty acid                           |
| KS 302 | 1154 | CLR_cluster_043 | 24 | 366 | 9.00E+00  | FabF_Bacillus_FAS | Fatty acid                           |
| KS 309 | 1160 | CLR_cluster_114 | 45 | 354 | 8.00E-77  | FabF_Bacillus_FAS | Fatty acid                           |
| KS 311 | 1259 | CLR_cluster_137 | 33 | 424 | 4.00E-44  | FabB_Ecoli_FAS    | Fatty acid                           |
| KS 314 | 1160 | CLR_cluster_214 | 45 | 354 | 2.00E-73  | FabF_Bacillus_FAS | Fatty acid                           |
| KS 322 | 1214 | CLR_cluster_098 | 46 | 404 | 7.00E-84  | FabF_Bacillus_FAS | Fatty acid                           |
| KS 325 | 1286 | CLR_cluster_056 | 48 | 433 | 8.00E-105 | EpoD_Q9L8C7_2mod  | Epothilone                           |
| KS 327 | 1154 | CLR_cluster_009 | 25 | 409 | 5.00E-28  | FabF_Bacillus_FAS | Fatty acid                           |
| KS 329 | 1160 | CLR_cluster_069 | 43 | 406 | 3.00E-71  | FabF_Bacillus_FAS | Fatty acid                           |
| KS 330 | 1223 | CLR_cluster_201 | 57 | 408 | 1.00E-121 | FabF_Bacillus_FAS | Fatty acid                           |
| KS 334 | 1229 | CLR_cluster_079 | 53 | 410 | 6.00E-106 | FabF_Bacillus_FAS | Fatty acid                           |
| KS 338 | 1292 | CLR_cluster_133 | 39 | 441 | 1.00E-74  | EpoD_Q9L8C7_2mod  | Epothilone                           |
| KS 340 | 1154 | CLR_cluster_118 | 43 | 406 | 6.00E-65  | FabF_Bacillus_FAS | Fatty acid                           |
| KS 342 | 1292 | CLR_cluster_089 | 39 | 440 | 1.00E-65  | HSAF_ABL86391_i   | HSAF (heat stable antifungal factor) |
| KS 346 | 1229 | CLR_cluster_096 | 53 | 410 | 1.00E-116 | FabF_Bacillus_FAS | Fatty acid                           |
| KS 354 | 1232 | CLR_cluster_231 | 51 | 410 | 7.00E-120 | FabF_Bacillus_FAS | Fatty acid                           |
| KS 358 | 1292 | CLR_cluster_055 | 36 | 414 | 1.00E-61  | EpoD_Q9L8C7_2mod  | Epothilone                           |
| KS 364 | 1292 | CLR_cluster_027 | 34 | 440 | 2.00E-66  | FUMON_AAD43562_i  | Fumonisin                            |
| KS 366 | 1229 | CLR_cluster_025 | 51 | 414 | 1.00E-122 | FabF_Bacillus_FAS | Fatty acid                           |
| KS 368 | 1247 | CLR_cluster_204 | 53 | 414 | 1.00E-121 | FabF_Bacillus_FAS | Fatty acid                           |
| KS 372 | 1298 | CLR_cluster_132 | 39 | 441 | 3.00E-71  | EpoD_Q9L8C7_2mod  | Epothilone                           |
| KS 373 | 1220 | CLR_cluster_030 | 59 | 408 | 3.00E-130 | FabF_Bacillus_FAS | Fatty acid                           |
| KS 375 | 1100 | CLR_cluster_032 | 40 | 261 | 3.00E-39  | FabF_Ecoli_FAS    | Fatty acid                           |
| KS 376 | 1007 | CLR_cluster_275 | 46 | 334 | 2.00E-87  | FabF_Bacillus_FAS | Fatty acid                           |
| KS 382 | 1292 | CLR_cluster_087 | 38 | 441 | 2.00E-71  | EpoD_Q9L8C7_2mod  | Epothilone                           |
| KS 384 | 1220 | CLR_cluster_261 | 50 | 408 | 4.00E-116 | FabF_Bacillus_FAS | Fatty acid                           |
| KS 393 | 1247 | CLR_cluster_200 | 51 | 416 | 1.00E-118 | FabF_Bacillus_FAS | Fatty acid                           |
| KS 395 | 995  | CLR_cluster_262 | 53 | 328 | 1.00E-91  | FabF_Bacillus_FAS | Fatty acid                           |
| KS 403 | 1286 | CLR_cluster_135 | 51 | 432 | 2.00E-113 | EpoD_Q9L8C7_4mod  | Epothilone                           |
| KS 407 | 1184 | CLR_cluster_010 | 33 | 406 | 7.00E-46  | FabF_Bacillus_FAS | Fatty acid                           |
| KS 412 | 1223 | CLR_cluster_191 | 50 | 408 | 2.00E-113 | FabF_Bacillus_FAS | Fatty acid                           |
| KS 413 | 1184 | CLR_cluster_042 | 32 | 406 | 3.00E-39  | FabF_Bacillus_FAS | Fatty acid                           |

|        |      |                 |    |     |           |                   |                                      |
|--------|------|-----------------|----|-----|-----------|-------------------|--------------------------------------|
| KS 414 | 1292 | CLR_cluster_106 | 38 | 437 | 2.00E-63  | FUMON_AAD43562_i  | Fumonisin                            |
| KS 417 | 965  | CLR_cluster_251 | 43 | 320 | 2.00E-55  | FabF_Bacillus_FAS | Fatty acid                           |
| KS 419 | 1286 | CLR_cluster_212 | 50 | 438 | 5.00E-114 | EpoD_Q9L8C7_2mod  | Epothilone                           |
| KS 421 | 710  | CLR_cluster_278 | 51 | 237 | 7.00E-68  | EpoD_Q9L8C7_1mod  | Epothilone                           |
| KS 423 | 1064 | CLR_cluster_218 | 56 | 354 | 3.00E-97  | EpoD_Q9L8C7_4mod  | Epothilone                           |
| KS 424 | 1211 | CLR_cluster_104 | 55 | 399 | 2.00E-117 | FabF_Bacillus_FAS | Fatty acid                           |
| KS 428 | 1292 | CLR_cluster_053 | 39 | 441 | 2.00E-73  | EpoD_Q9L8C7_2mod  | Epothilone                           |
| KS 431 | 1235 | CLR_cluster_184 | 55 | 412 | 9.00E-115 | FabF_Bacillus_FAS | Fatty acid                           |
| KS 440 | 1286 | CLR_cluster_219 | 47 | 437 | 2.00E-100 | EpoF_Q9L8C5_1mod  | Epothilone                           |
| KS 447 | 1292 | CLR_cluster_177 | 39 | 439 | 4.00E-67  | TetA_BAE93722_KS1 | Tetronomycin                         |
| KS 454 | 1184 | CLR_cluster_121 | 60 | 393 | 5.00E-123 | FabF_Ecoli_FAS    | Fatty acid                           |
| KS 455 | 1286 | CLR_cluster_203 | 50 | 431 | 7.00E-104 | EpoD_Q9L8C7_2mod  | Epothilone                           |
| KS 461 | 1211 | CLR_cluster_145 | 52 | 401 | 5.00E-117 | FabF_Bacillus_FAS | Fatty acid                           |
| KS 465 | 983  | CLR_cluster_141 | 53 | 327 | 1.00E-84  | FabF_Bacillus_FAS | Fatty acid                           |
| KS 466 | 1190 | CLR_cluster_128 | 51 | 398 | 1.00E-106 | FabF_Bacillus_FAS | Fatty acid                           |
| KS 473 | 1175 | CLR_cluster_012 | 61 | 391 | 7.00E-128 | FabF_Ecoli_FAS    | Fatty acid                           |
| KS 479 | 1184 | CLR_cluster_112 | 57 | 394 | 2.00E-131 | FabF_Bacillus_FAS | Fatty acid                           |
| KS 483 | 1112 | CLR_cluster_017 | 45 | 358 | 3.00E-64  | FabF_Bacillus_FAS | Fatty acid                           |
| KS 488 | 1076 | CLR_cluster_277 | 57 | 359 | 6.00E-101 | FabF_Bacillus_FAS | Fatty acid                           |
| KS 503 | 1286 | CLR_cluster_174 | 51 | 434 | 2.00E-105 | EpoD_Q9L8C7_4mod  | Epothilone                           |
| KS 504 | 1157 | CLR_cluster_176 | 42 | 385 | 7.00E-72  | TetA_BAE93722_KS1 | Tetronomycin                         |
| KS 505 | 1286 | CLR_cluster_005 | 48 | 433 | 3.00E-109 | EpoD_Q9L8C7_2mod  | Epothilone                           |
| KS 508 | 1292 | CLR_cluster_107 | 38 | 444 | 2.00E-66  | HSAF_ABL86391_i   | HSAF (heat stable antifungal factor) |
| KS 514 | 1184 | CLR_cluster_072 | 55 | 394 | 5.00E-133 | FabF_Bacillus_FAS | Fatty acid                           |
| KS 518 | 1244 | CLR_cluster_144 | 51 | 426 | 2.00E-105 | EpoD_Q9L8C7_2mod  | Epothilone                           |
| KS 521 | 1220 | CLR_cluster_156 | 50 | 404 | 4.00E-84  | FabF_Ecoli_FAS    | Fatty acid                           |
| KS 527 | 1286 | CLR_cluster_149 | 52 | 428 | 9.00E-116 | EpoD_Q9L8C7_2mod  | Epothilone                           |
| KS 528 | 1292 | CLR_cluster_024 | 49 | 429 | 3.00E-110 | EpoD_Q9L8C7_2mod  | Epothilone                           |
| KS 536 | 1292 | CLR_cluster_029 | 49 | 439 | 3.00E-113 | EpoD_Q9L8C7_2mod  | Epothilone                           |
| KS 537 | 1286 | CLR_cluster_153 | 51 | 431 | 3.00E-107 | EpoF_Q9L8C5_1mod  | Epothilone                           |
| KS 540 | 1286 | CLR_cluster_040 | 48 | 434 | 9.00E-106 | EpoD_Q9L8C7_4mod  | Epothilone                           |
| KS 546 | 1286 | CLR_cluster_159 | 50 | 434 | 7.00E-114 | EpoD_Q9L8C7_2mod  | Epothilone                           |



|        |      |                 |    |     |           |                    |               |
|--------|------|-----------------|----|-----|-----------|--------------------|---------------|
| KS 549 | 1283 | CLR_cluster_123 | 52 | 429 | 2.00E-117 | EpoD_Q9L8C7_4mod   | Epothilone    |
| KS 550 | 1277 | CLR_cluster_066 | 53 | 425 | 9.00E-120 | EpoD_Q9L8C7_4mod   | Epothilone    |
| KS 557 | 1301 | CLR_cluster_194 | 51 | 432 | 1.00E-111 | EpoD_Q9L8C7_4mod   | Epothilone    |
| KS 558 | 1250 | CLR_cluster_059 | 53 | 428 | 2.00E-104 | AveA2_Q9S0R7_4mod  | Avermectin    |
| KS 563 | 1292 | CLR_cluster_034 | 49 | 428 | 7.00E-115 | EpoF_Q9L8C5_1mod   | Epothilone    |
| KS 564 | 1286 | CLR_cluster_124 | 47 | 439 | 1.00E-104 | EpoD_Q9L8C7_2mod   | Epothilone    |
| KS 576 | 1094 | CLR_cluster_232 | 44 | 363 | 3.00E-87  | FabF_Bacillus_FAS  | Fatty acid    |
| KS 579 | 1178 | CLR_cluster_008 | 36 | 405 | 4.00E-53  | FabF_Bacillus_FAS  | Fatty acid    |
| KS 580 | 1010 | CLR_cluster_070 | 35 | 209 | 6.00E-31  | FabF_Bacillus_FAS  | Fatty acid    |
| KS 585 | 989  | CLR_cluster_221 | 35 | 260 | 9.00E-38  | FabF_Bacillus_FAS  | Fatty acid    |
| KS 586 | 1184 | CLR_cluster_044 | 35 | 376 | 8.00E-52  | FabF_Bacillus_FAS  | Fatty acid    |
| KS 590 | 1094 | CLR_cluster_020 | 59 | 365 | 1.00E-115 | TetF_BAE93731_2mod | Tetronomycin  |
| KS 591 | 1283 | CLR_cluster_026 | 53 | 428 | 5.00E-121 | EpoD_Q9L8C7_4mod   | Epothilone    |
| KS 602 | 722  | CLR_cluster_247 | 40 | 245 | 3.00E-40  | TylGI_O33954_KS1   | Tylosin       |
| KS 605 | 851  | CLR_cluster_109 | 25 | 269 | 1.00E+00  | FabF_Bacillus_FAS  | Fatty acid    |
| KS 607 | 653  | CLR_cluster_068 | 59 | 215 | 8.00E-70  | EpoD_Q9L8C7_1mod   | Epothilone    |
| KS 608 | 599  | CLR_cluster_234 | 61 | 196 | 2.00E-61  | EpoA_Q9L8C9_mod    | Epothilone    |
| KS 609 | 545  | CLR_cluster_163 | 56 | 178 | 4.00E-52  | EpoD_Q9L8C7_4mod   | Epothilone    |
| KS 611 | 449  | CLR_cluster_235 | 45 | 155 | 8.00E-29  | VirA_BAF50727_4T   | Virginiamycin |
| KS 613 | 362  | CLR_cluster_180 | 53 | 119 | 2.00E-36  | EpoD_Q9L8C7_4mod   | Epothilone    |
| KS 615 | 1262 | CLR_cluster_197 | 50 | 428 | 7.00E-106 | EpoD_Q9L8C7_4mod   | Epothilone    |
| KS 616 | 341  | CLR_cluster_245 | 59 | 111 | 3.00E-34  | NysI_Q9L4X3_5mod   | Nystatin      |
| KS 617 | 233  | CLR_cluster_250 | 53 | 74  | 3.00E-21  | EpoD_Q9L8C7_4mod   | Epothilone    |
| KS 618 | 233  | CLR_cluster_255 | 51 | 74  | 1.00E-20  | EpoD_Q9L8C7_4mod   | Epothilone    |
| KS 619 | 245  | CLR_cluster_268 | 48 | 80  | 7.00E-21  | EpoD_Q9L8C7_4mod   | Epothilone    |
| KS 620 | 1259 | CLR_cluster_125 | 53 | 423 | 7.00E-116 | EpoD_Q9L8C7_4mod   | Epothilone    |
| KS 626 | 1265 | CLR_cluster_136 | 51 | 427 | 2.00E-103 | EpoD_Q9L8C7_4mod   | Epothilone    |
| KS 630 | 1259 | CLR_cluster_175 | 54 | 423 | 8.00E-119 | EpoD_Q9L8C7_4mod   | Epothilone    |
| KS 633 | 1265 | CLR_cluster_093 | 54 | 424 | 3.00E-119 | EpoD_Q9L8C7_4mod   | Epothilone    |
| KS 637 | 1262 | CLR_cluster_160 | 54 | 424 | 8.00E-121 | EpoD_Q9L8C7_4mod   | Epothilone    |
| KS 640 | 1259 | CLR_cluster_154 | 50 | 425 | 1.00E-113 | EpoD_Q9L8C7_2mod   | Epothilone    |
| KS 644 | 1256 | CLR_cluster_026 | 52 | 435 | 5.00E-113 | TetF_BAE93731_2mod | Tetronomycin  |

|        |      |                 |    |     |           |                    |              |
|--------|------|-----------------|----|-----|-----------|--------------------|--------------|
| KS 645 | 1259 | CLR_cluster_161 | 49 | 424 | 1.00E-107 | EpoD_Q9L8C7_4mod   | Epothilone   |
| KS 646 | 1256 | CLR_cluster_117 | 51 | 422 | 5.00E-99  | EpoD_Q9L8C7_4mod   | Epothilone   |
| KS 649 | 1259 | CLR_cluster_080 | 49 | 422 | 7.00E-104 | EpoD_Q9L8C7_4mod   | Epothilone   |
| KS 654 | 1244 | CLR_cluster_058 | 51 | 436 | 3.00E-107 | EpoD_Q9L8C7_2mod   | Epothilone   |
| KS 659 | 1259 | CLR_cluster_047 | 53 | 421 | 8.00E-119 | EpoF_Q9L8C5_1mod   | Epothilone   |
| KS 661 | 1265 | CLR_cluster_103 | 48 | 428 | 2.00E-101 | EpoD_Q9L8C7_2mod   | Epothilone   |
| KS 669 | 1235 | CLR_cluster_208 | 50 | 418 | 1.00E-106 | EpoD_Q9L8C7_4mod   | Epothilone   |
| KS 671 | 1259 | CLR_cluster_048 | 52 | 424 | 9.00E-116 | EpoD_Q9L8C7_4mod   | Epothilone   |
| KS 674 | 1268 | CLR_cluster_020 | 55 | 421 | 2.00E-115 | EpoF_Q9L8C5_1mod   | Epothilone   |
| KS 681 | 1277 | CLR_cluster_075 | 52 | 424 | 4.00E-117 | EpoD_Q9L8C7_4mod   | Epothilone   |
| KS 683 | 1268 | CLR_cluster_075 | 56 | 424 | 3.00E-120 | EpoD_Q9L8C7_4mod   | Epothilone   |
| KS 688 | 1259 | CLR_cluster_068 | 52 | 423 | 7.00E-115 | EpoD_Q9L8C7_4mod   | Epothilone   |
| KS 695 | 1259 | CLR_cluster_056 | 53 | 428 | 3.00E-115 | EpoD_Q9L8C7_2mod   | Epothilone   |
| KS 701 | 1271 | CLR_cluster_173 | 54 | 427 | 8.00E-120 | TetE_BAE93730_1mod | Tetronomycin |
| KS 705 | 1259 | CLR_cluster_206 | 48 | 424 | 1.00E-111 | EpoD_Q9L8C7_4mod   | Epothilone   |
| KS 708 | 1262 | CLR_cluster_242 | 54 | 425 | 7.00E-113 | EpoD_Q9L8C7_4mod   | Epothilone   |
| KS 720 | 1259 | CLR_cluster_155 | 49 | 427 | 7.00E-109 | EpoD_Q9L8C7_2mod   | Epothilone   |
| KS 726 | 1259 | CLR_cluster_005 | 50 | 423 | 2.00E-112 | EpoD_Q9L8C7_4mod   | Epothilone   |
| KS 728 | 1259 | CLR_cluster_057 | 50 | 422 | 2.00E-107 | EpoD_Q9L8C7_4mod   | Epothilone   |
| KS 730 | 1265 | CLR_cluster_040 | 52 | 424 | 2.00E-101 | EpoD_Q9L8C7_4mod   | Epothilone   |
| KS 732 | 1262 | CLR_cluster_034 | 49 | 425 | 2.00E-102 | EpoD_Q9L8C7_4mod   | Epothilone   |
| KS 747 | 1109 | CLR_cluster_146 | 56 | 367 | 2.00E-108 | TetF_BAE93731_2mod | Tetronomycin |
| KS 749 | 1319 | CLR_cluster_050 | 48 | 444 | 6.00E-108 | EpoD_Q9L8C7_4mod   | Epothilone   |
| KS 751 | 224  | CLR_cluster_130 | 54 | 72  | 1.00E+00  | RapA_Q54297_2mod   | Rapamycin    |
| KS 755 | 1262 | CLR_cluster_047 | 54 | 425 | 5.00E-122 | EpoD_Q9L8C7_2mod   | Epothilone   |
| KS 757 | 1250 | CLR_cluster_020 | 53 | 428 | 4.00E-116 | EpoD_Q9L8C7_2mod   | Epothilone   |
| KS 761 | 1277 | CLR_cluster_026 | 51 | 424 | 5.00E-112 | NysJ_Q9L4X2_2mod   | Nystatin     |

Table S6. BLAST search of the KS sequences from the metagenome of *R. globostellata* against the KS sequences of known products from the NaPDos database

| KS ID  | Length (nt) | BGC ID          | Identity (%) | Aligned length (aa) | E-value   | NaPDos ID           | Pathway product |
|--------|-------------|-----------------|--------------|---------------------|-----------|---------------------|-----------------|
| KS_001 | 696         | RHG_cluster_258 | 59           | 229                 | 9.00E-71  | EpoD_Q9L8C7_4mod    | Epothilone      |
| KS_004 | 1185        | RHG_cluster_332 | 47           | 398                 | 1.00E-82  | FabF_Bacillus_FAS   | Fatty acid      |
| KS_006 | 1128        | RHG_cluster_316 | 51           | 364                 | 5.00E-97  | NysJ_Q9L4X2_2mod    | Nystatin        |
| KS_007 | 1059        | RHG_cluster_341 | 38           | 350                 | 5.00E-58  | TetA_BAE93722_KS1   | Tetronomycin    |
| KS_010 | 1176        | RHG_cluster_342 | 56           | 378                 | 2.00E-111 | EpoD_Q9L8C7_4mod    | Epothilone      |
| KS_011 | 801         | RHG_cluster_340 | 52           | 272                 | 2.00E-72  | Strep_ZP_06279092_i | Unkown          |
| KS_012 | 429         | RHG_cluster_282 | 58           | 139                 | 1.00E-44  | NysC_Q9L4W3_2mod    | Nystatin        |
| KS_014 | 1086        | RHG_cluster_275 | 47           | 361                 | 5.00E-94  | FabF_Bacillus_FAS   | Fatty acid      |
| KS_016 | 1239        | RHG_cluster_191 | 52           | 414                 | 2.00E-91  | EpoF_Q9L8C5_1mod    | Epothilone      |
| KS_019 | 1017        | RHG_cluster_352 | 63           | 341                 | 2.00E-113 | FabB_Ecoli_FAS      | Fatty acid      |
| KS_020 | 705         | RHG_cluster_308 | 57           | 229                 | 2.00E-72  | EpoD_Q9L8C7_2mod    | Epothilone      |
| KS_021 | 771         | RHG_cluster_354 | 41           | 254                 | 3.00E-53  | FUMON_AAD43562_i    | Fumonisin       |
| KS_026 | 1080        | RHG_cluster_321 | 56           | 359                 | 2.00E-116 | FabF_Bacillus_FAS   | Fatty acid      |
| KS_028 | 591         | RHG_cluster_221 | 57           | 194                 | 1.00E-60  | EpoD_Q9L8C7_2mod    | Epothilone      |
| KS_033 | 1266        | RHG_cluster_087 | 54           | 432                 | 3.00E-117 | EpoD_Q9L8C7_4mod    | Epothilone      |
| KS_036 | 792         | RHG_cluster_345 | 54           | 258                 | 2.00E-76  | EpoD_Q9L8C7_4mod    | Epothilone      |
| KS_037 | 390         | RHG_cluster_351 | 65           | 127                 | 7.00E-43  | EpoD_Q9L8C7_4mod    | Epothilone      |
| KS_040 | 1038        | RHG_cluster_295 | 52           | 344                 | 4.00E-100 | EpoD_Q9L8C7_2mod    | Epothilone      |
| KS_043 | 540         | RHG_cluster_283 | 44           | 185                 | 2.00E-26  | VirA_BAF50727_4T    | Virginiamycin   |
| KS_045 | 741         | RHG_cluster_338 | 56           | 241                 | 6.00E-65  | EpoD_Q9L8C7_1mod    | Epothilone      |
| KS_046 | 354         | RHG_cluster_362 | 44           | 115                 | 3.00E+00  | FUMON_AAD43562_i    | Fumonisin       |
| KS_048 | 1266        | RHG_cluster_136 | 38           | 430                 | 6.00E-70  | EpoD_Q9L8C7_2mod    | Epothilone      |
| KS_052 | 285         | RHG_cluster_367 | 52           | 91                  | 5.00E-26  | AveA2_Q9S0R7_3mod   | Avermectin      |
| KS_053 | 543         | RHG_cluster_357 | 63           | 177                 | 5.00E-60  | EpoD_Q9L8C7_4mod    | Epothilone      |
| KS_054 | 525         | RHG_cluster_356 | 65           | 172                 | 8.00E-53  | EpoD_Q9L8C7_4mod    | Epothilone      |
| KS_056 | 1008        | RHG_cluster_355 | 53           | 336                 | 2.00E-93  | FabF_Bacillus_FAS   | Fatty acid      |
| KS_060 | 444         | RHG_cluster_183 | 44           | 153                 | 3.00E-29  | VirA_BAF50727_4T    | Virginiamycin   |
| KS_062 | 657         | RHG_cluster_318 | 55           | 216                 | 3.00E-67  | EpoD_Q9L8C7_2mod    | Epothilone      |

|        |      |                 |    |     |           |                     |              |
|--------|------|-----------------|----|-----|-----------|---------------------|--------------|
| KS_063 | 1230 | RHG_cluster_019 | 52 | 420 | 8.00E-104 | EpoD_Q9L8C7_2mod    | Epothilone   |
| KS_065 | 591  | RHG_cluster_255 | 57 | 194 | 3.00E-60  | EpoD_Q9L8C7_2mod    | Epothilone   |
| KS_067 | 1272 | RHG_cluster_124 | 52 | 424 | 1.00E-112 | EpoD_Q9L8C7_4mod    | Epothilone   |
| KS_069 | 825  | RHG_cluster_168 | 54 | 272 | 5.00E-73  | EpoD_Q9L8C7_4mod    | Epothilone   |
| KS_071 | 1152 | RHG_cluster_294 | 53 | 364 | 3.00E-105 | EpoD_Q9L8C7_2mod    | Epothilone   |
| KS_074 | 1187 | RHG_cluster_151 | 53 | 396 | 3.00E-99  | FabF_Bacillus_FAS   | Fatty acid   |
| KS_075 | 1136 | RHG_cluster_164 | 54 | 351 | 4.00E-104 | EpoF_Q9L8C5_1mod    | Epothilone   |
| KS_077 | 1097 | RHG_cluster_310 | 65 | 362 | 7.00E-131 | FabF_Ecoli_FAS      | Fatty acid   |
| KS_080 | 1094 | RHG_cluster_343 | 56 | 365 | 3.00E-114 | FabF_Bacillus_FAS   | Fatty acid   |
| KS_083 | 1130 | RHG_cluster_336 | 49 | 375 | 2.00E-95  | TetF_BAE93731_2mod  | Tetronomycin |
| KS_088 | 893  | RHG_cluster_279 | 55 | 292 | 9.00E-77  | EpoA_Q9L8C9_mod     | Epothilone   |
| KS_091 | 977  | RHG_cluster_119 | 56 | 322 | 1.00E-95  | EpoD_Q9L8C7_2mod    | Epothilone   |
| KS_094 | 1097 | RHG_cluster_111 | 32 | 392 | 3.00E-43  | FabF_Bacillus_FAS   | Fatty acid   |
| KS_096 | 1097 | RHG_cluster_116 | 35 | 385 | 5.00E-43  | FabF_Bacillus_FAS   | Fatty acid   |
| KS_098 | 1100 | RHG_cluster_184 | 41 | 267 | 1.00E-42  | FabF_Ecoli_FAS      | Fatty acid   |
| KS_103 | 1007 | RHG_cluster_365 | 51 | 335 | 5.00E-85  | FabF_Bacillus_FAS   | Fatty acid   |
| KS_104 | 1223 | RHG_cluster_007 | 62 | 407 | 8.00E-138 | FabF_Ecoli_FAS      | Fatty acid   |
| KS_107 | 1223 | RHG_cluster_018 | 53 | 407 | 3.00E-114 | FabF_Bacillus_FAS   | Fatty acid   |
| KS_108 | 1217 | RHG_cluster_278 | 63 | 405 | 1.00E-139 | FabB_Ecoli_FAS      | Fatty acid   |
| KS_109 | 1208 | RHG_cluster_153 | 64 | 405 | 8.00E-134 | FabB_Ecoli_FAS      | Fatty acid   |
| KS_110 | 1202 | RHG_cluster_073 | 62 | 400 | 1.00E-141 | FabB_Ecoli_FAS      | Fatty acid   |
| KS_112 | 1250 | RHG_cluster_127 | 53 | 413 | 4.00E-120 | FabF_Bacillus_FAS   | Fatty acid   |
| KS_113 | 1259 | RHG_cluster_237 | 48 | 431 | 7.00E-106 | TylGIII_O33956_2mod | Tylosin      |
| KS_130 | 1091 | RHG_cluster_315 | 58 | 365 | 7.00E-124 | FabF_Ecoli_FAS      | Fatty acid   |
| KS_131 | 1226 | RHG_cluster_098 | 51 | 408 | 2.00E-105 | FabF_Bacillus_FAS   | Fatty acid   |
| KS_135 | 1199 | RHG_cluster_033 | 39 | 404 | 7.00E-85  | FabF_Bacillus_FAS   | Fatty acid   |
| KS_137 | 1184 | RHG_cluster_156 | 57 | 395 | 4.00E-124 | FabB_Ecoli_FAS      | Fatty acid   |
| KS_140 | 1250 | RHG_cluster_277 | 53 | 413 | 9.00E-108 | FabF_Bacillus_FAS   | Fatty acid   |
| KS_143 | 1223 | RHG_cluster_049 | 61 | 407 | 1.00E-132 | FabF_Ecoli_FAS      | Fatty acid   |
| KS_144 | 1223 | RHG_cluster_138 | 53 | 408 | 2.00E-118 | FabF_Bacillus_FAS   | Fatty acid   |
| KS_148 | 1214 | RHG_cluster_231 | 45 | 245 | 3.00E-50  | FabF_Ecoli_FAS      | Fatty acid   |
| KS_151 | 1196 | RHG_cluster_250 | 63 | 402 | 2.00E-117 | FabB_Ecoli_FAS      | Fatty acid   |

|        |      |                 |    |     |           |                   |            |
|--------|------|-----------------|----|-----|-----------|-------------------|------------|
| KS 153 | 1250 | RHG cluster 079 | 38 | 423 | 3.00E-61  | FabF_Bacillus_FAS | Fatty acid |
| KS 161 | 1073 | RHG cluster 292 | 66 | 359 | 1.00E-124 | FabB_Ecoli_FAS    | Fatty acid |
| KS 162 | 1202 | RHG cluster 108 | 60 | 402 | 5.00E-125 | FabB_Ecoli_FAS    | Fatty acid |
| KS 166 | 1223 | RHG cluster 023 | 53 | 408 | 9.00E-114 | FabF_Bacillus_FAS | Fatty acid |
| KS 167 | 1151 | RHG cluster 271 | 58 | 384 | 2.00E-119 | FabF_Bacillus_FAS | Fatty acid |
| KS 173 | 1253 | RHG cluster 326 | 52 | 423 | 3.00E-118 | EpoD_Q9L8C7_4mod  | Epothilone |
| KS 174 | 1229 | RHG cluster 130 | 53 | 410 | 7.00E-109 | FabF_Bacillus_FAS | Fatty acid |
| KS 175 | 1217 | RHG cluster 114 | 51 | 407 | 1.00E-123 | FabF_Bacillus_FAS | Fatty acid |
| KS 176 | 1265 | RHG cluster 335 | 53 | 427 | 8.00E-102 | EpoD_Q9L8C7_4mod  | Epothilone |
| KS 178 | 1187 | RHG cluster 217 | 52 | 369 | 5.00E-106 | EpoF_Q9L8C5_1mod  | Epothilone |
| KS 181 | 1223 | RHG cluster 188 | 58 | 407 | 1.00E-137 | FabF_Bacillus_FAS | Fatty acid |
| KS 182 | 1223 | RHG cluster 225 | 57 | 408 | 1.00E-134 | FabF_Bacillus_FAS | Fatty acid |
| KS 186 | 1280 | RHG cluster 078 | 27 | 434 | 3.00E-25  | FabF_Ecoli_FAS    | Fatty acid |
| KS 188 | 1217 | RHG cluster 009 | 62 | 405 | 3.00E-139 | FabF_Ecoli_FAS    | Fatty acid |
| KS 189 | 1196 | RHG cluster 334 | 60 | 400 | 7.00E-132 | FabF_Ecoli_FAS    | Fatty acid |
| KS 191 | 1226 | RHG cluster 142 | 56 | 408 | 1.00E-113 | FabF_Ecoli_FAS    | Fatty acid |
| KS 193 | 1091 | RHG cluster 359 | 57 | 364 | 2.00E-112 | FabF_Ecoli_FAS    | Fatty acid |
| KS 195 | 1163 | RHG cluster 122 | 61 | 383 | 2.00E-119 | FabF_Ecoli_FAS    | Fatty acid |
| KS 197 | 1226 | RHG cluster 305 | 51 | 408 | 4.00E-114 | FabF_Bacillus_FAS | Fatty acid |
| KS 202 | 1223 | RHG cluster 344 | 56 | 382 | 3.00E-112 | FabF_Ecoli_FAS    | Fatty acid |
| KS 203 | 1217 | RHG cluster 235 | 61 | 407 | 6.00E-135 | FabF_Ecoli_FAS    | Fatty acid |
| KS 205 | 1064 | RHG cluster 120 | 46 | 272 | 1.00E-57  | FabF_Ecoli_FAS    | Fatty acid |
| KS 218 | 1136 | RHG cluster 080 | 21 | 371 | 7.00E+00  | FabF_Bacillus_FAS | Fatty acid |
| KS 220 | 1223 | RHG cluster 274 | 63 | 383 | 2.00E-133 | FabF_Ecoli_FAS    | Fatty acid |
| KS 223 | 1223 | RHG cluster 012 | 61 | 408 | 2.00E-117 | FabF_Ecoli_FAS    | Fatty acid |
| KS 224 | 1259 | RHG cluster 296 | 52 | 424 | 3.00E-107 | EpoD_Q9L8C7_4mod  | Epothilone |
| KS 225 | 1223 | RHG cluster 319 | 56 | 405 | 6.00E-111 | FabF_Bacillus_FAS | Fatty acid |
| KS 235 | 1217 | RHG cluster 324 | 52 | 407 | 1.00E-123 | FabF_Bacillus_FAS | Fatty acid |
| KS 236 | 1223 | RHG cluster 347 | 61 | 407 | 6.00E-127 | FabF_Ecoli_FAS    | Fatty acid |
| KS 237 | 1223 | RHG cluster 281 | 54 | 408 | 1.00E-124 | FabF_Bacillus_FAS | Fatty acid |
| KS 240 | 1157 | RHG cluster 051 | 43 | 406 | 7.00E-72  | FabF_Bacillus_FAS | Fatty acid |
| KS 244 | 1220 | RHG cluster 263 | 60 | 407 | 6.00E-131 | FabF_Ecoli_FAS    | Fatty acid |

|        |      |                 |    |     |           |                   |                                      |
|--------|------|-----------------|----|-----|-----------|-------------------|--------------------------------------|
| KS 249 | 1226 | RHG cluster 220 | 56 | 408 | 1.00E-113 | FabF_Ecoli_FAS    | Fatty acid                           |
| KS 252 | 1292 | RHG cluster 011 | 39 | 445 | 5.00E-70  | EpoD_Q9L8C7_2mod  | Epothilone                           |
| KS 254 | 1226 | RHG cluster 301 | 58 | 409 | 5.00E-123 | FabF_Bacillus_FAS | Fatty acid                           |
| KS 256 | 1229 | RHG cluster 039 | 51 | 409 | 1.00E-114 | FabF_Bacillus_FAS | Fatty acid                           |
| KS 259 | 1220 | RHG cluster 148 | 38 | 407 | 2.00E-69  | FabF_Bacillus_FAS | Fatty acid                           |
| KS 261 | 1223 | RHG cluster 035 | 63 | 408 | 1.00E-141 | FabF_Ecoli_FAS    | Fatty acid                           |
| KS 264 | 1214 | RHG cluster 227 | 55 | 404 | 1.00E-121 | FabF_Bacillus_FAS | Fatty acid                           |
| KS 267 | 1292 | RHG cluster 028 | 39 | 443 | 1.00E-69  | EpoD_Q9L8C7_2mod  | Epothilone                           |
| KS 269 | 1151 | RHG cluster 212 | 44 | 405 | 9.00E-76  | FabF_Bacillus_FAS | Fatty acid                           |
| KS 270 | 1229 | RHG cluster 185 | 55 | 409 | 1.00E-119 | FabF_Bacillus_FAS | Fatty acid                           |
| KS 278 | 1226 | RHG cluster 020 | 58 | 408 | 2.00E-136 | FabF_Bacillus_FAS | Fatty acid                           |
| KS 285 | 1280 | RHG cluster 081 | 43 | 431 | 3.00E-88  | FabF_Bacillus_FAS | Fatty acid                           |
| KS 290 | 1292 | RHG cluster 091 | 37 | 438 | 2.00E-67  | EpoD_Q9L8C7_2mod  | Epothilone                           |
| KS 292 | 1292 | RHG cluster 096 | 39 | 450 | 6.00E-75  | Avi_AAK83194_i    | Avilamycin                           |
| KS 295 | 1286 | RHG cluster 094 | 52 | 423 | 4.00E-118 | EpoD_Q9L8C7_4mod  | Epothilone                           |
| KS 296 | 1229 | RHG cluster 244 | 52 | 407 | 2.00E-102 | FabF_Bacillus_FAS | Fatty acid                           |
| KS 298 | 1259 | RHG cluster 253 | 33 | 424 | 3.00E-44  | FabB_Ecoli_FAS    | Fatty acid                           |
| KS 299 | 1160 | RHG cluster 273 | 45 | 354 | 2.00E-73  | FabF_Bacillus_FAS | Fatty acid                           |
| KS 300 | 1226 | RHG cluster 075 | 56 | 407 | 1.00E-129 | FabF_Bacillus_FAS | Fatty acid                           |
| KS 304 | 1154 | RHG cluster 045 | 25 | 409 | 5.00E-28  | FabF_Bacillus_FAS | Fatty acid                           |
| KS 313 | 1226 | RHG cluster 178 | 55 | 407 | 6.00E-126 | FabF_Bacillus_FAS | Fatty acid                           |
| KS 316 | 1217 | RHG cluster 264 | 44 | 404 | 1.00E-81  | FabF_Bacillus_FAS | Fatty acid                           |
| KS 318 | 1214 | RHG cluster 030 | 46 | 404 | 7.00E-84  | FabF_Bacillus_FAS | Fatty acid                           |
| KS 319 | 1160 | RHG cluster 259 | 45 | 357 | 9.00E-77  | FabF_Bacillus_FAS | Fatty acid                           |
| KS 320 | 1286 | RHG cluster 215 | 47 | 437 | 2.00E-100 | EpoF_Q9L8C5_1mod  | Epothilone                           |
| KS 324 | 1223 | RHG cluster 313 | 57 | 408 | 1.00E-121 | FabF_Bacillus_FAS | Fatty acid                           |
| KS 328 | 1154 | RHG cluster 133 | 24 | 366 | 9.00E+00  | FabF_Bacillus_FAS | Fatty acid                           |
| KS 331 | 1160 | RHG cluster 085 | 43 | 406 | 3.00E-71  | FabF_Bacillus_FAS | Fatty acid                           |
| KS 333 | 1286 | RHG cluster 165 | 48 | 433 | 8.00E-105 | EpoD_Q9L8C7_2mod  | Epothilone                           |
| KS 335 | 1298 | RHG cluster 302 | 39 | 441 | 3.00E-71  | EpoD_Q9L8C7_2mod  | Epothilone                           |
| KS 343 | 1229 | RHG cluster 222 | 52 | 410 | 1.00E-110 | FabF_Bacillus_FAS | Fatty acid                           |
| KS 344 | 1292 | RHG cluster 016 | 39 | 440 | 1.00E-65  | HSAF_ABL86391_i   | HSAF (heat stable antifungal factor) |

|        |      |                 |    |     |           |                   |                                      |
|--------|------|-----------------|----|-----|-----------|-------------------|--------------------------------------|
| KS 347 | 1292 | RHG cluster 034 | 34 | 440 | 2.00E-66  | FUMON_AAD43562_i  | Fumonisin                            |
| KS 348 | 1226 | RHG cluster 348 | 49 | 408 | 6.00E-106 | FabF_Bacillus_FAS | Fatty acid                           |
| KS 352 | 1229 | RHG cluster 004 | 51 | 414 | 1.00E-122 | FabF_Bacillus_FAS | Fatty acid                           |
| KS 355 | 1154 | RHG cluster 236 | 43 | 406 | 6.00E-65  | FabF_Bacillus_FAS | Fatty acid                           |
| KS 359 | 1292 | RHG cluster 206 | 38 | 430 | 3.00E-70  | RapC_Q54299_2mod  | Rapamycin                            |
| KS 365 | 1220 | RHG cluster 031 | 59 | 408 | 1.00E-129 | FabF_Bacillus_FAS | Fatty acid                           |
| KS 367 | 1229 | RHG cluster 084 | 53 | 410 | 6.00E-106 | FabF_Bacillus_FAS | Fatty acid                           |
| KS 374 | 1184 | RHG cluster 360 | 47 | 394 | 1.00E-93  | FabF_Bacillus_FAS | Fatty acid                           |
| KS 377 | 1229 | RHG cluster 150 | 48 | 408 | 1.00E-110 | FabF_Bacillus_FAS | Fatty acid                           |
| KS 380 | 1292 | RHG cluster 135 | 38 | 441 | 2.00E-71  | EpoD_Q9L8C7_2mod  | Epothilone                           |
| KS 387 | 1292 | RHG cluster 067 | 39 | 441 | 1.00E-74  | EpoD_Q9L8C7_2mod  | Epothilone                           |
| KS 388 | 1229 | RHG cluster 317 | 52 | 410 | 4.00E-119 | FabF_Bacillus_FAS | Fatty acid                           |
| KS 390 | 1223 | RHG cluster 172 | 59 | 406 | 9.00E-132 | FabF_Bacillus_FAS | Fatty acid                           |
| KS 392 | 1247 | RHG cluster 097 | 51 | 416 | 1.00E-119 | FabF_Bacillus_FAS | Fatty acid                           |
| KS 396 | 1292 | RHG cluster 269 | 39 | 439 | 2.00E-74  | EpoD_Q9L8C7_2mod  | Epothilone                           |
| KS 397 | 1292 | RHG cluster 202 | 38 | 444 | 3.00E-67  | HSAF_ABL86391_i   | HSAF (heat stable antifungal factor) |
| KS 398 | 1286 | RHG cluster 167 | 48 | 433 | 1.00E-104 | EpoD_Q9L8C7_2mod  | Epothilone                           |
| KS 400 | 1184 | RHG cluster 132 | 32 | 406 | 3.00E-39  | FabF_Bacillus_FAS | Fatty acid                           |
| KS 406 | 1184 | RHG cluster 044 | 33 | 406 | 7.00E-46  | FabF_Bacillus_FAS | Fatty acid                           |
| KS 408 | 1292 | RHG cluster 128 | 39 | 435 | 5.00E-68  | TetA_BAE93722_KS1 | Tetronomycin                         |
| KS 410 | 1286 | RHG cluster 037 | 51 | 432 | 2.00E-113 | EpoD_Q9L8C7_4mod  | Epothilone                           |
| KS 411 | 1223 | RHG cluster 214 | 50 | 408 | 2.00E-113 | FabF_Bacillus_FAS | Fatty acid                           |
| KS 429 | 1292 | RHG cluster 040 | 50 | 434 | 2.00E-112 | EpoD_Q9L8C7_2mod  | Epothilone                           |
| KS 430 | 1292 | RHG cluster 109 | 39 | 441 | 1.00E-72  | EpoD_Q9L8C7_2mod  | Epothilone                           |
| KS 437 | 1235 | RHG cluster 077 | 55 | 412 | 1.00E-114 | FabF_Bacillus_FAS | Fatty acid                           |
| KS 439 | 1211 | RHG cluster 086 | 55 | 399 | 2.00E-117 | FabF_Bacillus_FAS | Fatty acid                           |
| KS 446 | 1289 | RHG cluster 069 | 48 | 438 | 1.00E-101 | EpoD_Q9L8C7_2mod  | Epothilone                           |
| KS 448 | 1292 | RHG cluster 209 | 39 | 439 | 4.00E-67  | TetA_BAE93722_KS1 | Tetronomycin                         |
| KS 449 | 1160 | RHG cluster 241 | 59 | 389 | 2.00E-123 | FabB_Ecoli_FAS    | Fatty acid                           |
| KS 452 | 1286 | RHG cluster 249 | 52 | 435 | 2.00E-113 | EpoD_Q9L8C7_2mod  | Epothilone                           |
| KS 453 | 1286 | RHG cluster 174 | 50 | 431 | 7.00E-104 | EpoD_Q9L8C7_2mod  | Epothilone                           |
| KS 459 | 1184 | RHG cluster 218 | 60 | 393 | 2.00E-123 | FabF_Ecoli_FAS    | Fatty acid                           |

|        |      |                 |    |     |           |                   |              |
|--------|------|-----------------|----|-----|-----------|-------------------|--------------|
| KS 460 | 1145 | RHG cluster 074 | 39 | 386 | 3.00E-49  | FabF_Bacillus_FAS | Fatty acid   |
| KS 462 | 1190 | RHG cluster 143 | 51 | 398 | 1.00E-106 | FabF_Bacillus_FAS | Fatty acid   |
| KS 468 | 1175 | RHG cluster 068 | 61 | 391 | 7.00E-128 | FabF_Ecoli_FAS    | Fatty acid   |
| KS 469 | 1286 | RHG cluster 100 | 47 | 437 | 2.00E-99  | EpoF_Q9L8C5_1mod  | Epothilone   |
| KS 471 | 1175 | RHG cluster 144 | 60 | 391 | 4.00E-131 | FabF_Ecoli_FAS    | Fatty acid   |
| KS 474 | 1211 | RHG cluster 216 | 51 | 401 | 3.00E-116 | FabF_Bacillus_FAS | Fatty acid   |
| KS 476 | 1133 | RHG cluster 061 | 38 | 356 | 5.00E-52  | FabB_Ecoli_FAS    | Fatty acid   |
| KS 481 | 1154 | RHG cluster 303 | 60 | 385 | 6.00E-127 | FabB_Ecoli_FAS    | Fatty acid   |
| KS 484 | 1298 | RHG cluster 298 | 50 | 434 | 3.00E-106 | EpoD_Q9L8C7_4mod  | Epothilone   |
| KS 486 | 1112 | RHG cluster 059 | 45 | 358 | 3.00E-64  | FabF_Bacillus_FAS | Fatty acid   |
| KS 490 | 1292 | RHG cluster 213 | 40 | 440 | 3.00E-75  | EpoD_Q9L8C7_4mod  | Epothilone   |
| KS 491 | 1286 | RHG cluster 154 | 47 | 434 | 6.00E-106 | EpoD_Q9L8C7_2mod  | Epothilone   |
| KS 494 | 1292 | RHG cluster 072 | 39 | 435 | 6.00E-68  | TetA_BAE93722_KS1 | Tetronomycin |
| KS 495 | 1292 | RHG cluster 272 | 39 | 442 | 6.00E-78  | EpoD_Q9L8C7_2mod  | Epothilone   |
| KS 497 | 1286 | RHG cluster 163 | 51 | 434 | 2.00E-105 | EpoD_Q9L8C7_4mod  | Epothilone   |
| KS 498 | 1286 | RHG cluster 322 | 47 | 437 | 1.00E-100 | EpoF_Q9L8C5_1mod  | Epothilone   |
| KS 499 | 1094 | RHG cluster 265 | 53 | 365 | 3.00E-114 | FabF_Bacillus_FAS | Fatty acid   |
| KS 501 | 1286 | RHG cluster 204 | 49 | 439 | 3.00E-110 | EpoD_Q9L8C7_2mod  | Epothilone   |
| KS 506 | 1286 | RHG cluster 179 | 53 | 430 | 6.00E-104 | EpoD_Q9L8C7_4mod  | Epothilone   |
| KS 507 | 1286 | RHG cluster 057 | 48 | 433 | 3.00E-109 | EpoD_Q9L8C7_2mod  | Epothilone   |
| KS 511 | 1292 | RHG cluster 090 | 52 | 432 | 9.00E-116 | EpoD_Q9L8C7_4mod  | Epothilone   |
| KS 516 | 1292 | RHG cluster 162 | 49 | 433 | 2.00E-111 | EpoD_Q9L8C7_2mod  | Epothilone   |
| KS 517 | 1220 | RHG cluster 155 | 50 | 404 | 4.00E-84  | FabF_Ecoli_FAS    | Fatty acid   |
| KS 519 | 1184 | RHG cluster 065 | 55 | 394 | 5.00E-133 | FabF_Bacillus_FAS | Fatty acid   |
| KS 520 | 1286 | RHG cluster 195 | 48 | 429 | 9.00E-111 | EpoD_Q9L8C7_2mod  | Epothilone   |
| KS 525 | 1286 | RHG cluster 192 | 50 | 430 | 1.00E-114 | EpoD_Q9L8C7_2mod  | Epothilone   |
| KS 526 | 1148 | RHG cluster 103 | 61 | 384 | 1.00E-124 | FabF_Ecoli_FAS    | Fatty acid   |
| KS 529 | 1292 | RHG cluster 194 | 49 | 429 | 3.00E-110 | EpoD_Q9L8C7_2mod  | Epothilone   |
| KS 532 | 1286 | RHG cluster 266 | 52 | 428 | 6.00E-116 | EpoD_Q9L8C7_2mod  | Epothilone   |
| KS 538 | 1286 | RHG cluster 160 | 50 | 429 | 1.00E-113 | EpoD_Q9L8C7_2mod  | Epothilone   |
| KS 541 | 1286 | RHG cluster 027 | 48 | 434 | 9.00E-106 | EpoD_Q9L8C7_4mod  | Epothilone   |
| KS 543 | 1286 | RHG cluster 054 | 51 | 431 | 3.00E-107 | EpoF_Q9L8C5_1mod  | Epothilone   |



|        |      |                 |    |     |           |                       |              |
|--------|------|-----------------|----|-----|-----------|-----------------------|--------------|
| KS 545 | 1292 | RHG cluster 242 | 49 | 439 | 6.00E-113 | EpoD_Q9L8C7_2mod      | Epothilone   |
| KS 548 | 1277 | RHG cluster 159 | 53 | 426 | 2.00E-120 | EpoD_Q9L8C7_4mod      | Epothilone   |
| KS 551 | 1292 | RHG cluster 147 | 49 | 428 | 7.00E-115 | EpoF_Q9L8C5_1mod      | Epothilone   |
| KS 553 | 1250 | RHG cluster 053 | 53 | 428 | 2.00E-104 | AveA2_Q9S0R7_4mod     | Avermectin   |
| KS 554 | 1283 | RHG cluster 008 | 52 | 429 | 2.00E-117 | EpoD_Q9L8C7_4mod      | Epothilone   |
| KS 555 | 1286 | RHG cluster 177 | 47 | 439 | 1.00E-104 | EpoD_Q9L8C7_2mod      | Epothilone   |
| KS 559 | 1301 | RHG cluster 285 | 51 | 432 | 2.00E-111 | EpoD_Q9L8C7_4mod      | Epothilone   |
| KS 569 | 1292 | RHG cluster 238 | 48 | 440 | 4.00E-109 | EpoD_Q9L8C7_2mod      | Epothilone   |
| KS 570 | 1073 | RHG cluster 095 | 33 | 362 | 2.00E-39  | FabF_Bacillus_FAS     | Fatty acid   |
| KS 572 | 1286 | RHG cluster 288 | 48 | 441 | 2.00E-110 | EpoD_Q9L8C7_2mod      | Epothilone   |
| KS 573 | 1292 | RHG cluster 056 | 50 | 433 | 6.00E-112 | EpoD_Q9L8C7_2mod      | Epothilone   |
| KS 575 | 1067 | RHG cluster 232 | 31 | 314 | 4.00E-37  | FabF_Bacillus_FAS     | Fatty acid   |
| KS 577 | 1178 | RHG cluster 046 | 36 | 405 | 4.00E-53  | FabF_Bacillus_FAS     | Fatty acid   |
| KS 581 | 1010 | RHG cluster 121 | 35 | 209 | 6.00E-31  | FabF_Bacillus_FAS     | Fatty acid   |
| KS 583 | 1184 | RHG cluster 134 | 35 | 376 | 8.00E-52  | FabF_Bacillus_FAS     | Fatty acid   |
| KS 588 | 1016 | RHG cluster 125 | 37 | 260 | 6.00E-38  | FabF_Bacillus_FAS     | Fatty acid   |
| KS 593 | 1283 | RHG cluster 306 | 53 | 428 | 5.00E-121 | EpoD_Q9L8C7_4mod      | Epothilone   |
| KS 596 | 1259 | RHG cluster 261 | 49 | 424 | 2.00E-104 | EpoD_Q9L8C7_4mod      | Epothilone   |
| KS 599 | 1079 | RHG cluster 182 | 28 | 336 | 2.00E+00  | FabF_Bacillus_FAS     | Fatty acid   |
| KS 603 | 851  | RHG cluster 270 | 27 | 259 | 2.00E+00  | FabB_Streptomyces_FAS | Fatty acid   |
| KS 614 | 1259 | RHG cluster 262 | 50 | 427 | 1.00E-109 | EpoD_Q9L8C7_4mod      | Epothilone   |
| KS 621 | 1259 | RHG cluster 208 | 53 | 423 | 7.00E-116 | EpoD_Q9L8C7_4mod      | Epothilone   |
| KS 625 | 1262 | RHG cluster 289 | 50 | 428 | 5.00E-106 | EpoD_Q9L8C7_4mod      | Epothilone   |
| KS 627 | 1265 | RHG cluster 162 | 51 | 427 | 2.00E-103 | EpoD_Q9L8C7_4mod      | Epothilone   |
| KS 628 | 1277 | RHG cluster 248 | 50 | 433 | 4.00E-112 | EpoD_Q9L8C7_2mod      | Epothilone   |
| KS 636 | 1262 | RHG cluster 119 | 54 | 424 | 8.00E-121 | EpoD_Q9L8C7_4mod      | Epothilone   |
| KS 638 | 1259 | RHG cluster 226 | 50 | 426 | 2.00E-108 | EpoD_Q9L8C7_4mod      | Epothilone   |
| KS 642 | 713  | RHG cluster 140 | 60 | 235 | 7.00E-74  | EpoD_Q9L8C7_1mod      | Epothilone   |
| KS 643 | 1256 | RHG cluster 233 | 52 | 435 | 5.00E-113 | TetF_BAE93731_2mod    | Tetronomycin |
| KS 647 | 1256 | RHG cluster 229 | 51 | 422 | 3.00E-99  | EpoD_Q9L8C7_4mod      | Epothilone   |
| KS 650 | 1235 | RHG cluster 191 | 55 | 423 | 8.00E-107 | EpoD_Q9L8C7_4mod      | Epothilone   |
| KS 652 | 1259 | RHG cluster 268 | 49 | 427 | 2.00E-103 | TetF_BAE93731_2mod    | Tetronomycin |

|        |      |                 |    |     |           |                    |              |
|--------|------|-----------------|----|-----|-----------|--------------------|--------------|
| KS 655 | 1244 | RHG cluster 203 | 51 | 436 | 3.00E-107 | EpoD_Q9L8C7_2mod   | Epothilone   |
| KS 657 | 1259 | RHG cluster 140 | 53 | 421 | 8.00E-119 | EpoF_Q9L8C5_1mod   | Epothilone   |
| KS 660 | 1259 | RHG cluster 197 | 50 | 423 | 2.00E-112 | EpoD_Q9L8C7_4mod   | Epothilone   |
| KS 662 | 1265 | RHG cluster 062 | 48 | 428 | 2.00E-101 | EpoD_Q9L8C7_2mod   | Epothilone   |
| KS 664 | 1277 | RHG cluster 145 | 51 | 424 | 4.00E-112 | NysJ_Q9L4X2_2mod   | Nystatin     |
| KS 666 | 1265 | RHG cluster 246 | 52 | 428 | 3.00E-116 | EpoD_Q9L8C7_2mod   | Epothilone   |
| KS 668 | 1259 | RHG cluster 240 | 50 | 426 | 3.00E-110 | EpoD_Q9L8C7_4mod   | Epothilone   |
| KS 670 | 1259 | RHG cluster 014 | 52 | 424 | 9.00E-116 | EpoD_Q9L8C7_4mod   | Epothilone   |
| KS 672 | 1262 | RHG cluster 198 | 48 | 429 | 4.00E-106 | TetE_BAE93730_1mod | Tetronomycin |
| KS 673 | 1268 | RHG cluster 119 | 55 | 421 | 2.00E-115 | EpoF_Q9L8C5_1mod   | Epothilone   |
| KS 677 | 1259 | RHG cluster 149 | 51 | 427 | 1.00E-113 | EpoD_Q9L8C7_2mod   | Epothilone   |
| KS 679 | 1253 | RHG cluster 053 | 50 | 420 | 3.00E-106 | EpoF_Q9L8C5_1mod   | Epothilone   |
| KS 682 | 1277 | RHG cluster 140 | 52 | 424 | 4.00E-117 | EpoD_Q9L8C7_4mod   | Epothilone   |
| KS 685 | 1268 | RHG cluster 140 | 56 | 424 | 3.00E-120 | EpoD_Q9L8C7_4mod   | Epothilone   |
| KS 689 | 1259 | RHG cluster 161 | 52 | 423 | 7.00E-115 | EpoD_Q9L8C7_4mod   | Epothilone   |
| KS 691 | 1259 | RHG cluster 164 | 51 | 422 | 2.00E-111 | EpoD_Q9L8C7_4mod   | Epothilone   |
| KS 692 | 1259 | RHG cluster 124 | 51 | 429 | 1.00E-113 | EpoD_Q9L8C7_4mod   | Epothilone   |
| KS 693 | 1259 | RHG cluster 037 | 53 | 427 | 1.00E-112 | EpoD_Q9L8C7_4mod   | Epothilone   |
| KS 697 | 1265 | RHG cluster 165 | 53 | 428 | 4.00E-115 | EpoD_Q9L8C7_2mod   | Epothilone   |
| KS 700 | 1271 | RHG cluster 019 | 54 | 427 | 8.00E-120 | TetE_BAE93730_1mod | Tetronomycin |
| KS 704 | 1262 | RHG cluster 154 | 49 | 424 | 4.00E-113 | EpoD_Q9L8C7_4mod   | Epothilone   |
| KS 707 | 1262 | RHG cluster 069 | 54 | 425 | 7.00E-113 | EpoD_Q9L8C7_4mod   | Epothilone   |
| KS 712 | 1259 | RHG cluster 100 | 52 | 427 | 5.00E-117 | EpoD_Q9L8C7_2mod   | Epothilone   |
| KS 714 | 1256 | RHG cluster 040 | 50 | 423 | 2.00E-110 | EpoF_Q9L8C5_1mod   | Epothilone   |
| KS 715 | 1259 | RHG cluster 090 | 49 | 427 | 2.00E-110 | EpoD_Q9L8C7_2mod   | Epothilone   |
| KS 719 | 1259 | RHG cluster 056 | 49 | 427 | 7.00E-109 | EpoD_Q9L8C7_2mod   | Epothilone   |
| KS 723 | 1256 | RHG cluster 054 | 51 | 430 | 9.00E-114 | EpoD_Q9L8C7_2mod   | Epothilone   |
| KS 724 | 1259 | RHG cluster 057 | 50 | 423 | 2.00E-112 | EpoD_Q9L8C7_4mod   | Epothilone   |
| KS 727 | 1259 | RHG cluster 179 | 50 | 422 | 2.00E-107 | EpoD_Q9L8C7_4mod   | Epothilone   |
| KS 729 | 1265 | RHG cluster 027 | 52 | 424 | 2.00E-101 | EpoD_Q9L8C7_4mod   | Epothilone   |
| KS 733 | 1262 | RHG cluster 147 | 47 | 426 | 7.00E-102 | EpoD_Q9L8C7_2mod   | Epothilone   |
| KS 735 | 1124 | RHG cluster 194 | 49 | 379 | 1.00E-92  | EpoD_Q9L8C7_4mod   | Epothilone   |

|        |      |                 |    |     |           |                    |              |
|--------|------|-----------------|----|-----|-----------|--------------------|--------------|
| KS 738 | 1277 | RHG cluster 159 | 53 | 435 | 2.00E-114 | EpoD_Q9L8C7_4mod   | Epothilone   |
| KS 741 | 1259 | RHG cluster 008 | 51 | 422 | 1.00E-113 | EpoD_Q9L8C7_4mod   | Epothilone   |
| KS 744 | 1262 | RHG cluster 087 | 49 | 424 | 4.00E-107 | TetE_BAE93730_1mod | Tetronomycin |
| KS 746 | 1274 | RHG cluster 177 | 49 | 428 | 9.00E-99  | EpoD_Q9L8C7_4mod   | Epothilone   |
| KS 754 | 1262 | RHG cluster 193 | 54 | 425 | 5.00E-122 | EpoD_Q9L8C7_2mod   | Epothilone   |
| KS 758 | 1250 | RHG cluster 119 | 53 | 428 | 4.00E-116 | EpoD_Q9L8C7_2mod   | Epothilone   |
| KS 759 | 1268 | RHG cluster 019 | 57 | 430 | 1.00E-117 | EpoD_Q9L8C7_4mod   | Epothilone   |

Table S7. BLAST search of the KS sequences from the metagenome of *Sphēciospongia* sp. against the KS sequences of known products from the NaPDos database

| KS ID  | Length (nt) | BGC ID          | Identity (%) | Aligned length (aa) | E-value   | NaPDos ID         | Pathway product |
|--------|-------------|-----------------|--------------|---------------------|-----------|-------------------|-----------------|
| KS_002 | 1086        | SPV_cluster_403 | 62           | 359                 | 4.00E-122 | FabF_Ecoli_FAS    | Fatty acid      |
| KS_003 | 459         | SPV_cluster_447 | 62           | 150                 | 2.00E-49  | EpoD_Q9L8C7_4mod  | Epothilone      |
| KS_005 | 1266        | SPV_cluster_194 | 38           | 431                 | 3.00E-68  | EpoD_Q9L8C7_2mod  | Epothilone      |
| KS_008 | 1266        | SPV_cluster_115 | 53           | 432                 | 6.00E-115 | EpoD_Q9L8C7_4mod  | Epothilone      |
| KS_009 | 663         | SPV_cluster_191 | 56           | 209                 | 6.00E-64  | EpoD_Q9L8C7_4mod  | Epothilone      |
| KS_015 | 435         | SPV_cluster_422 | 59           | 143                 | 3.00E-47  | EpoD_Q9L8C7_4mod  | Epothilone      |
| KS_017 | 696         | SPV_cluster_454 | 43           | 228                 | 1.00E-44  | FUMON_AAD43562_i  | Fumonisin       |
| KS_018 | 1266        | SPV_cluster_241 | 54           | 432                 | 6.00E-117 | EpoD_Q9L8C7_4mod  | Epothilone      |
| KS_022 | 783         | SPV_cluster_440 | 53           | 258                 | 2.00E-75  | EpoD_Q9L8C7_2mod  | Epothilone      |
| KS_023 | 297         | SPV_cluster_287 | 52           | 96                  | 4.00E-24  | EpoD_Q9L8C7_4mod  | Epothilone      |
| KS_024 | 945         | SPV_cluster_405 | 55           | 286                 | 5.00E-87  | EpoD_Q9L8C7_1mod  | Epothilone      |
| KS_025 | 1221        | SPV_cluster_202 | 51           | 406                 | 4.00E-110 | EpoD_Q9L8C7_4mod  | Epothilone      |
| KS_027 | 351         | SPV_cluster_456 | 55           | 114                 | 6.00E-33  | EpoD_Q9L8C7_4mod  | Epothilone      |
| KS_031 | 744         | SPV_cluster_302 | 54           | 246                 | 8.00E-67  | EpoD_Q9L8C7_4mod  | Epothilone      |
| KS_034 | 1077        | SPV_cluster_360 | 54           | 355                 | 2.00E-93  | EpoD_Q9L8C7_4mod  | Epothilone      |
| KS_035 | 1014        | SPV_cluster_461 | 63           | 339                 | 9.00E-107 | FabF_Ecoli_FAS    | Fatty acid      |
| KS_038 | 1113        | SPV_cluster_096 | 52           | 368                 | 1.00E-101 | EpoD_Q9L8C7_2mod  | Epothilone      |
| KS_042 | 669         | SPV_cluster_382 | 58           | 212                 | 9.00E-61  | EpoD_Q9L8C7_4mod  | Epothilone      |
| KS_047 | 1113        | SPV_cluster_418 | 53           | 365                 | 3.00E-103 | EpoD_Q9L8C7_4mod  | Epothilone      |
| KS_049 | 438         | SPV_cluster_450 | 53           | 143                 | 3.00E-43  | EpoD_Q9L8C7_2mod  | Epothilone      |
| KS_050 | 279         | SPV_cluster_446 | 54           | 90                  | 6.00E+00  | NysC_Q9L4W3_2mod  | Nystatin        |
| KS_051 | 531         | SPV_cluster_451 | 56           | 171                 | 7.00E-53  | AveA2_Q9S0R7_2mod | Avermectin      |
| KS_055 | 312         | SPV_cluster_391 | 45           | 109                 | 2.00E+00  | VirA_BAF50727_4T  | Virginiamycin   |
| KS_057 | 849         | SPV_cluster_378 | 57           | 276                 | 4.00E-78  | EpoD_Q9L8C7_1mod  | Epothilone      |
| KS_058 | 954         | SPV_cluster_384 | 52           | 322                 | 1.00E-86  | EpoA_Q9L8C9_mod   | Epothilone      |
| KS_059 | 570         | SPV_cluster_455 | 60           | 186                 | 3.00E-51  | EpoA_Q9L8C9_mod   | Epothilone      |
| KS_068 | 888         | SPV_cluster_333 | 53           | 279                 | 2.00E-74  | EpoD_Q9L8C7_1mod  | Epothilone      |
| KS_070 | 1023        | SPV_cluster_408 | 26           | 336                 | 2.00E-22  | FabF_Bacillus_FAS | Fatty acid      |

|        |      |                 |    |     |           |                    |               |
|--------|------|-----------------|----|-----|-----------|--------------------|---------------|
| KS 072 | 912  | SPV cluster 428 | 57 | 285 | 3.00E-88  | EpoD_Q9L8C7_4mod   | Epothilone    |
| KS 076 | 713  | SPV cluster 204 | 42 | 224 | 1.00E-44  | TetA_BAE93722_KS1  | Tetronomycin  |
| KS 081 | 1118 | SPV cluster 373 | 52 | 377 | 8.00E-94  | TetF_BAE93731_2mod | Tetronomycin  |
| KS 082 | 1166 | SPV cluster 273 | 54 | 367 | 5.00E-105 | EpoA_Q9L8C9_mod    | Epothilone    |
| KS 085 | 1112 | SPV cluster 396 | 52 | 369 | 9.00E-106 | EpoF_Q9L8C5_1mod   | Epothilone    |
| KS 086 | 671  | SPV cluster 323 | 56 | 229 | 1.00E-66  | EpoA_Q9L8C9_mod    | Epothilone    |
| KS 087 | 1097 | SPV cluster 425 | 52 | 365 | 1.00E-99  | EpoD_Q9L8C7_2mod   | Epothilone    |
| KS 089 | 929  | SPV cluster 347 | 58 | 285 | 4.00E-88  | EpoD_Q9L8C7_1mod   | Epothilone    |
| KS 090 | 398  | SPV cluster 386 | 50 | 140 | 2.00E-29  | VirA_BAF50727_4T   | Virginiamycin |
| KS 092 | 1133 | SPV cluster 423 | 54 | 378 | 9.00E-116 | FabF_Bacillus_FAS  | Fatty acid    |
| KS 093 | 1085 | SPV cluster 279 | 60 | 361 | 5.00E-114 | FabF_Bacillus_FAS  | Fatty acid    |
| KS 097 | 914  | SPV cluster 292 | 50 | 273 | 6.00E-75  | NysJ_Q9L4X2_2mod   | Nystatin      |
| KS 099 | 1061 | SPV cluster 262 | 48 | 355 | 2.00E-72  | FabF_Bacillus_FAS  | Fatty acid    |
| KS 100 | 1292 | SPV cluster 356 | 38 | 439 | 7.00E-73  | EpoD_Q9L8C7_2mod   | Epothilone    |
| KS 114 | 1043 | SPV cluster 318 | 61 | 349 | 1.00E-124 | FabB_Ecoli_FAS     | Fatty acid    |
| KS 118 | 1223 | SPV cluster 209 | 53 | 407 | 7.00E-113 | FabF_Bacillus_FAS  | Fatty acid    |
| KS 119 | 1199 | SPV cluster 043 | 40 | 404 | 2.00E-86  | FabF_Bacillus_FAS  | Fatty acid    |
| KS 121 | 1223 | SPV cluster 417 | 53 | 408 | 4.00E-121 | FabF_Bacillus_FAS  | Fatty acid    |
| KS 122 | 1184 | SPV cluster 401 | 57 | 398 | 1.00E-128 | FabB_Ecoli_FAS     | Fatty acid    |
| KS 123 | 1223 | SPV cluster 099 | 61 | 407 | 1.00E-132 | FabF_Ecoli_FAS     | Fatty acid    |
| KS 124 | 1202 | SPV cluster 375 | 62 | 401 | 3.00E-132 | FabB_Ecoli_FAS     | Fatty acid    |
| KS 125 | 1250 | SPV cluster 160 | 53 | 413 | 9.00E-108 | FabF_Bacillus_FAS  | Fatty acid    |
| KS 127 | 1205 | SPV cluster 228 | 63 | 403 | 7.00E-140 | FabB_Ecoli_FAS     | Fatty acid    |
| KS 128 | 1223 | SPV cluster 054 | 52 | 408 | 3.00E-120 | FabF_Bacillus_FAS  | Fatty acid    |
| KS 129 | 1223 | SPV cluster 033 | 53 | 409 | 6.00E-122 | FabF_Bacillus_FAS  | Fatty acid    |
| KS 132 | 1196 | SPV cluster 416 | 63 | 402 | 2.00E-117 | FabB_Ecoli_FAS     | Fatty acid    |
| KS 133 | 998  | SPV cluster 358 | 44 | 335 | 5.00E-80  | FabF_Bacillus_FAS  | Fatty acid    |
| KS 136 | 1223 | SPV cluster 324 | 52 | 408 | 3.00E-122 | FabF_Bacillus_FAS  | Fatty acid    |
| KS 139 | 1202 | SPV cluster 293 | 62 | 400 | 1.00E-141 | FabB_Ecoli_FAS     | Fatty acid    |
| KS 141 | 1211 | SPV cluster 230 | 60 | 401 | 3.00E-123 | FabB_Ecoli_FAS     | Fatty acid    |
| KS 145 | 1256 | SPV cluster 074 | 49 | 414 | 3.00E-106 | FabF_Bacillus_FAS  | Fatty acid    |
| KS 147 | 1208 | SPV cluster 155 | 64 | 405 | 2.00E-134 | FabB_Ecoli_FAS     | Fatty acid    |

|        |      |                 |    |     |           |                   |            |
|--------|------|-----------------|----|-----|-----------|-------------------|------------|
| KS 149 | 1223 | SPV cluster 076 | 62 | 407 | 4.00E-137 | FabF_Ecoli_FAS    | Fatty acid |
| KS 152 | 1226 | SPV cluster 251 | 51 | 408 | 6.00E-117 | FabF_Bacillus_FAS | Fatty acid |
| KS 155 | 1058 | SPV cluster 438 | 60 | 354 | 3.00E-110 | FabB_Ecoli_FAS    | Fatty acid |
| KS 156 | 1100 | SPV cluster 349 | 54 | 364 | 2.00E-80  | FabF_Bacillus_FAS | Fatty acid |
| KS 157 | 1223 | SPV cluster 032 | 53 | 408 | 3.00E-113 | FabF_Bacillus_FAS | Fatty acid |
| KS 158 | 1220 | SPV cluster 233 | 39 | 406 | 8.00E-55  | FabF_Bacillus_FAS | Fatty acid |
| KS 160 | 1286 | SPV cluster 245 | 53 | 428 | 2.00E-117 | EpoD_Q9L8C7_4mod  | Epothilone |
| KS 164 | 1223 | SPV cluster 329 | 56 | 408 | 7.00E-125 | FabF_Bacillus_FAS | Fatty acid |
| KS 165 | 1223 | SPV cluster 039 | 54 | 407 | 5.00E-122 | FabF_Bacillus_FAS | Fatty acid |
| KS 168 | 1223 | SPV cluster 002 | 58 | 407 | 6.00E-140 | FabF_Bacillus_FAS | Fatty acid |
| KS 169 | 1253 | SPV cluster 413 | 52 | 423 | 3.00E-118 | EpoD_Q9L8C7_4mod  | Epothilone |
| KS 171 | 1223 | SPV cluster 235 | 57 | 407 | 6.00E-129 | FabF_Bacillus_FAS | Fatty acid |
| KS 172 | 1229 | SPV cluster 014 | 54 | 410 | 9.00E-111 | FabF_Bacillus_FAS | Fatty acid |
| KS 177 | 1292 | SPV cluster 421 | 39 | 441 | 1.00E-73  | EpoD_Q9L8C7_2mod  | Epothilone |
| KS 180 | 1028 | SPV cluster 432 | 52 | 343 | 3.00E-92  | FabF_Bacillus_FAS | Fatty acid |
| KS 184 | 1217 | SPV cluster 430 | 50 | 407 | 2.00E-121 | FabF_Bacillus_FAS | Fatty acid |
| KS 185 | 1052 | SPV cluster 411 | 32 | 361 | 8.00E-38  | FabF_Bacillus_FAS | Fatty acid |
| KS 187 | 1223 | SPV cluster 254 | 60 | 407 | 3.00E-135 | FabF_Ecoli_FAS    | Fatty acid |
| KS 190 | 1223 | SPV cluster 284 | 63 | 382 | 5.00E-133 | FabF_Ecoli_FAS    | Fatty acid |
| KS 192 | 1202 | SPV cluster 138 | 36 | 408 | 1.00E-59  | FabF_Bacillus_FAS | Fatty acid |
| KS 194 | 1229 | SPV cluster 317 | 46 | 411 | 3.00E-80  | FabF_Bacillus_FAS | Fatty acid |
| KS 200 | 1223 | SPV cluster 258 | 56 | 405 | 6.00E-111 | FabF_Bacillus_FAS | Fatty acid |
| KS 207 | 1223 | SPV cluster 389 | 59 | 383 | 2.00E-128 | FabF_Ecoli_FAS    | Fatty acid |
| KS 209 | 1220 | SPV cluster 128 | 59 | 408 | 2.00E-140 | FabF_Ecoli_FAS    | Fatty acid |
| KS 210 | 1214 | SPV cluster 009 | 57 | 407 | 1.00E-128 | FabF_Ecoli_FAS    | Fatty acid |
| KS 211 | 1340 | SPV cluster 001 | 49 | 451 | 1.00E-89  | EpoE_Q9L8C6_1mod  | Epothilone |
| KS 213 | 1229 | SPV cluster 441 | 49 | 408 | 1.00E-114 | FabF_Bacillus_FAS | Fatty acid |
| KS 214 | 1223 | SPV cluster 289 | 51 | 408 | 2.00E-121 | FabF_Bacillus_FAS | Fatty acid |
| KS 215 | 1214 | SPV cluster 239 | 50 | 406 | 7.00E-94  | FabF_Bacillus_FAS | Fatty acid |
| KS 216 | 1226 | SPV cluster 003 | 57 | 408 | 3.00E-114 | FabF_Ecoli_FAS    | Fatty acid |
| KS 219 | 1199 | SPV cluster 148 | 44 | 403 | 2.00E-95  | FabF_Bacillus_FAS | Fatty acid |
| KS 226 | 1157 | SPV cluster 086 | 43 | 406 | 7.00E-72  | FabF_Bacillus_FAS | Fatty acid |

|        |      |                 |    |     |           |                   |              |
|--------|------|-----------------|----|-----|-----------|-------------------|--------------|
| KS 228 | 1223 | SPV cluster 195 | 48 | 407 | 2.00E-99  | FabF_Bacillus_FAS | Fatty acid   |
| KS 229 | 1217 | SPV cluster 280 | 60 | 407 | 2.00E-134 | FabF_Ecoli_FAS    | Fatty acid   |
| KS 230 | 1223 | SPV cluster 037 | 61 | 408 | 2.00E-117 | FabF_Ecoli_FAS    | Fatty acid   |
| KS 233 | 1217 | SPV cluster 060 | 59 | 406 | 3.00E-134 | FabF_Ecoli_FAS    | Fatty acid   |
| KS 234 | 1217 | SPV cluster 121 | 61 | 407 | 2.00E-134 | FabF_Ecoli_FAS    | Fatty acid   |
| KS 238 | 1217 | SPV cluster 180 | 51 | 407 | 1.00E-123 | FabF_Bacillus_FAS | Fatty acid   |
| KS 241 | 1163 | SPV cluster 207 | 60 | 382 | 1.00E-119 | FabF_Ecoli_FAS    | Fatty acid   |
| KS 242 | 1226 | SPV cluster 445 | 56 | 408 | 1.00E-113 | FabF_Ecoli_FAS    | Fatty acid   |
| KS 243 | 1217 | SPV cluster 015 | 62 | 405 | 3.00E-139 | FabF_Ecoli_FAS    | Fatty acid   |
| KS 245 | 1235 | SPV cluster 178 | 47 | 414 | 5.00E-90  | FabF_Ecoli_FAS    | Fatty acid   |
| KS 246 | 1187 | SPV cluster 126 | 43 | 251 | 6.00E-47  | FabF_Bacillus_FAS | Fatty acid   |
| KS 248 | 1220 | SPV cluster 197 | 61 | 408 | 1.00E-132 | FabF_Ecoli_FAS    | Fatty acid   |
| KS 251 | 1247 | SPV cluster 101 | 55 | 414 | 2.00E-97  | FabF_Ecoli_FAS    | Fatty acid   |
| KS 255 | 1229 | SPV cluster 222 | 55 | 409 | 1.00E-119 | FabF_Bacillus_FAS | Fatty acid   |
| KS 257 | 1292 | SPV cluster 426 | 38 | 439 | 2.00E-67  | EpoD_Q9L8C7_2mod  | Epothilone   |
| KS 258 | 1220 | SPV cluster 036 | 38 | 407 | 9.00E-70  | FabF_Bacillus_FAS | Fatty acid   |
| KS 260 | 1226 | SPV cluster 419 | 58 | 409 | 5.00E-123 | FabF_Bacillus_FAS | Fatty acid   |
| KS 265 | 1292 | SPV cluster 091 | 39 | 443 | 1.00E-69  | EpoD_Q9L8C7_2mod  | Epothilone   |
| KS 268 | 1292 | SPV cluster 172 | 38 | 435 | 2.00E-63  | TetA_BAE93722_KS1 | Tetronomycin |
| KS 271 | 1220 | SPV cluster 255 | 54 | 406 | 2.00E-107 | FabF_Bacillus_FAS | Fatty acid   |
| KS 272 | 1286 | SPV cluster 005 | 47 | 434 | 5.00E-109 | EpoD_Q9L8C7_4mod  | Epothilone   |
| KS 273 | 1220 | SPV cluster 025 | 55 | 406 | 5.00E-122 | FabF_Bacillus_FAS | Fatty acid   |
| KS 274 | 1226 | SPV cluster 024 | 58 | 408 | 2.00E-136 | FabF_Bacillus_FAS | Fatty acid   |
| KS 275 | 1229 | SPV cluster 031 | 51 | 409 | 6.00E-114 | FabF_Bacillus_FAS | Fatty acid   |
| KS 276 | 1223 | SPV cluster 217 | 62 | 408 | 1.00E-140 | FabF_Ecoli_FAS    | Fatty acid   |
| KS 277 | 1151 | SPV cluster 129 | 44 | 405 | 9.00E-76  | FabF_Bacillus_FAS | Fatty acid   |
| KS 280 | 1151 | SPV cluster 229 | 28 | 407 | 3.00E-31  | FabF_Bacillus_FAS | Fatty acid   |
| KS 281 | 1292 | SPV cluster 035 | 51 | 429 | 2.00E-115 | EpoD_Q9L8C7_2mod  | Epothilone   |
| KS 282 | 1226 | SPV cluster 159 | 50 | 409 | 7.00E-114 | FabF_Bacillus_FAS | Fatty acid   |
| KS 286 | 1229 | SPV cluster 402 | 52 | 407 | 2.00E-102 | FabF_Bacillus_FAS | Fatty acid   |
| KS 287 | 1289 | SPV cluster 214 | 47 | 438 | 3.00E-110 | EpoD_Q9L8C7_2mod  | Epothilone   |
| KS 288 | 1289 | SPV cluster 040 | 47 | 438 | 1.00E-110 | EpoD_Q9L8C7_2mod  | Epothilone   |

|        |      |                 |    |     |           |                    |              |
|--------|------|-----------------|----|-----|-----------|--------------------|--------------|
| KS 289 | 1286 | SPV cluster 225 | 52 | 423 | 3.00E-118 | EpoD_Q9L8C7_4mod   | Epothilone   |
| KS 291 | 1223 | SPV cluster 107 | 55 | 407 | 5.00E-132 | FabF_Bacillus_FAS  | Fatty acid   |
| KS 293 | 1292 | SPV cluster 161 | 37 | 438 | 2.00E-67  | EpoD_Q9L8C7_2mod   | Epothilone   |
| KS 297 | 1214 | SPV cluster 085 | 46 | 404 | 3.00E-84  | FabF_Bacillus_FAS  | Fatty acid   |
| KS 301 | 1154 | SPV cluster 093 | 25 | 409 | 5.00E-28  | FabF_Bacillus_FAS  | Fatty acid   |
| KS 303 | 1286 | SPV cluster 084 | 52 | 429 | 6.00E-115 | EpoD_Q9L8C7_4mod   | Epothilone   |
| KS 305 | 1067 | SPV cluster 406 | 50 | 331 | 7.00E-87  | FabF_Bacillus_FAS  | Fatty acid   |
| KS 306 | 1286 | SPV cluster 268 | 50 | 433 | 1.00E-101 | EpoD_Q9L8C7_2mod   | Epothilone   |
| KS 307 | 1259 | SPV cluster 312 | 33 | 424 | 6.00E-44  | FabB_Ecoli_FAS     | Fatty acid   |
| KS 308 | 1154 | SPV cluster 124 | 24 | 366 | 9.00E+00  | FabF_Bacillus_FAS  | Fatty acid   |
| KS 310 | 1223 | SPV cluster 400 | 57 | 408 | 1.00E-121 | FabF_Bacillus_FAS  | Fatty acid   |
| KS 312 | 1160 | SPV cluster 113 | 45 | 354 | 8.00E-77  | FabF_Bacillus_FAS  | Fatty acid   |
| KS 315 | 1160 | SPV cluster 320 | 43 | 406 | 3.00E-71  | FabF_Bacillus_FAS  | Fatty acid   |
| KS 317 | 1160 | SPV cluster 224 | 45 | 354 | 2.00E-73  | FabF_Bacillus_FAS  | Fatty acid   |
| KS 321 | 1217 | SPV cluster 081 | 44 | 404 | 9.00E-78  | FabF_Bacillus_FAS  | Fatty acid   |
| KS 323 | 1286 | SPV cluster 253 | 48 | 428 | 2.00E-99  | EpoF_Q9L8C5_1mod   | Epothilone   |
| KS 326 | 1223 | SPV cluster 353 | 53 | 408 | 5.00E-100 | FabF_Bacillus_FAS  | Fatty acid   |
| KS 332 | 1286 | SPV cluster 171 | 48 | 433 | 3.00E-105 | EpoD_Q9L8C7_2mod   | Epothilone   |
| KS 336 | 1292 | SPV cluster 163 | 40 | 438 | 1.00E-74  | TetA_BAE93722_KS1  | Tetronomycin |
| KS 337 | 1292 | SPV cluster 153 | 36 | 436 | 2.00E-56  | FUMON_AAD43562_i   | Fumonisin    |
| KS 339 | 1292 | SPV cluster 310 | 36 | 440 | 1.00E-62  | FUMON_AAD43562_i   | Fumonisin    |
| KS 341 | 1226 | SPV cluster 276 | 49 | 408 | 8.00E-106 | FabF_Bacillus_FAS  | Fatty acid   |
| KS 345 | 1154 | SPV cluster 290 | 43 | 406 | 6.00E-65  | FabF_Bacillus_FAS  | Fatty acid   |
| KS 349 | 1247 | SPV cluster 205 | 54 | 414 | 2.00E-122 | FabF_Bacillus_FAS  | Fatty acid   |
| KS 350 | 1292 | SPV cluster 300 | 38 | 439 | 3.00E-74  | EpoD_Q9L8C7_2mod   | Epothilone   |
| KS 351 | 1148 | SPV cluster 436 | 53 | 382 | 1.00E-111 | FabF_Bacillus_FAS  | Fatty acid   |
| KS 353 | 1292 | SPV cluster 108 | 38 | 452 | 2.00E-70  | KirAII_CAN89632_5T | Kirromycin   |
| KS 356 | 1292 | SPV cluster 166 | 36 | 414 | 1.00E-61  | EpoD_Q9L8C7_2mod   | Epothilone   |
| KS 357 | 1292 | SPV cluster 281 | 37 | 439 | 2.00E-70  | FUMON_AAD43562_i   | Fumonisin    |
| KS 360 | 1232 | SPV cluster 192 | 51 | 410 | 2.00E-120 | FabF_Bacillus_FAS  | Fatty acid   |
| KS 361 | 1292 | SPV cluster 065 | 34 | 440 | 2.00E-66  | FUMON_AAD43562_i   | Fumonisin    |
| KS 362 | 1220 | SPV cluster 271 | 57 | 407 | 1.00E-125 | FabF_Bacillus_FAS  | Fatty acid   |



|        |      |                 |    |     |           |                   |              |
|--------|------|-----------------|----|-----|-----------|-------------------|--------------|
| KS 363 | 1220 | SPV cluster 045 | 50 | 408 | 4.00E-116 | FabF_Bacillus_FAS | Fatty acid   |
| KS 369 | 1229 | SPV cluster 007 | 51 | 414 | 7.00E-123 | FabF_Bacillus_FAS | Fatty acid   |
| KS 370 | 1100 | SPV cluster 112 | 40 | 261 | 3.00E-39  | FabF_Ecoli_FAS    | Fatty acid   |
| KS 371 | 1298 | SPV cluster 141 | 39 | 441 | 3.00E-71  | EpoD_Q9L8C7_2mod  | Epothilone   |
| KS 378 | 1223 | SPV cluster 363 | 51 | 409 | 7.00E-127 | FabF_Bacillus_FAS | Fatty acid   |
| KS 379 | 1253 | SPV cluster 362 | 52 | 416 | 3.00E-120 | FabF_Bacillus_FAS | Fatty acid   |
| KS 381 | 1229 | SPV cluster 367 | 47 | 408 | 1.00E-99  | FabF_Bacillus_FAS | Fatty acid   |
| KS 383 | 1220 | SPV cluster 027 | 59 | 408 | 3.00E-130 | FabF_Bacillus_FAS | Fatty acid   |
| KS 385 | 1229 | SPV cluster 341 | 53 | 410 | 1.00E-116 | FabF_Bacillus_FAS | Fatty acid   |
| KS 386 | 1232 | SPV cluster 173 | 52 | 410 | 3.00E-120 | FabF_Bacillus_FAS | Fatty acid   |
| KS 389 | 1247 | SPV cluster 042 | 51 | 416 | 1.00E-116 | FabF_Bacillus_FAS | Fatty acid   |
| KS 391 | 1154 | SPV cluster 442 | 48 | 382 | 2.00E-93  | FabF_Bacillus_FAS | Fatty acid   |
| KS 394 | 1226 | SPV cluster 053 | 43 | 410 | 3.00E-94  | FabF_Bacillus_FAS | Fatty acid   |
| KS 399 | 1286 | SPV cluster 057 | 51 | 432 | 2.00E-113 | EpoD_Q9L8C7_4mod  | Epothilone   |
| KS 401 | 1184 | SPV cluster 125 | 32 | 406 | 4.00E-39  | FabF_Bacillus_FAS | Fatty acid   |
| KS 402 | 1184 | SPV cluster 092 | 33 | 406 | 8.00E-46  | FabF_Bacillus_FAS | Fatty acid   |
| KS 404 | 1223 | SPV cluster 275 | 44 | 407 | 9.00E-92  | FabF_Bacillus_FAS | Fatty acid   |
| KS 405 | 1292 | SPV cluster 049 | 38 | 437 | 2.00E-63  | FUMON_AAD43562_i  | Fumonisin    |
| KS 409 | 1292 | SPV cluster 067 | 39 | 439 | 1.00E-68  | TetA_BAE93722_KS1 | Tetronomycin |
| KS 415 | 1232 | SPV cluster 308 | 44 | 410 | 2.00E-95  | FabF_Bacillus_FAS | Fatty acid   |
| KS 416 | 1286 | SPV cluster 168 | 50 | 438 | 5.00E-114 | EpoD_Q9L8C7_2mod  | Epothilone   |
| KS 418 | 1088 | SPV cluster 444 | 53 | 363 | 8.00E-106 | FabF_Bacillus_FAS | Fatty acid   |
| KS 420 | 1286 | SPV cluster 371 | 49 | 430 | 6.00E-107 | EpoF_Q9L8C5_1mod  | Epothilone   |
| KS 422 | 1286 | SPV cluster 149 | 47 | 442 | 7.00E-107 | EpoD_Q9L8C7_2mod  | Epothilone   |
| KS 425 | 1232 | SPV cluster 201 | 49 | 411 | 5.00E-119 | FabF_Bacillus_FAS | Fatty acid   |
| KS 426 | 1211 | SPV cluster 339 | 55 | 399 | 2.00E-117 | FabF_Bacillus_FAS | Fatty acid   |
| KS 427 | 1175 | SPV cluster 215 | 48 | 373 | 1.00E-83  | FabF_Bacillus_FAS | Fatty acid   |
| KS 432 | 1286 | SPV cluster 146 | 47 | 437 | 2.00E-100 | EpoF_Q9L8C5_1mod  | Epothilone   |
| KS 433 | 1175 | SPV cluster 307 | 50 | 373 | 9.00E-87  | FabF_Bacillus_FAS | Fatty acid   |
| KS 434 | 1223 | SPV cluster 340 | 49 | 406 | 1.00E-109 | FabF_Bacillus_FAS | Fatty acid   |
| KS 435 | 1094 | SPV cluster 345 | 26 | 350 | 8.00E+00  | FabF_Bacillus_FAS | Fatty acid   |
| KS 436 | 1232 | SPV cluster 216 | 44 | 410 | 2.00E-97  | FabF_Bacillus_FAS | Fatty acid   |

|        |      |                 |    |     |           |                   |                                      |
|--------|------|-----------------|----|-----|-----------|-------------------|--------------------------------------|
| KS 438 | 1223 | SPV cluster 301 | 50 | 406 | 1.00E-105 | FabF_Bacillus_FAS | Fatty acid                           |
| KS 441 | 1046 | SPV cluster 443 | 49 | 347 | 3.00E-69  | FabF_Bacillus_FAS | Fatty acid                           |
| KS 442 | 1175 | SPV cluster 152 | 50 | 373 | 5.00E-88  | FabF_Bacillus_FAS | Fatty acid                           |
| KS 443 | 1175 | SPV cluster 414 | 48 | 365 | 6.00E-74  | FabF_Bacillus_FAS | Fatty acid                           |
| KS 444 | 1235 | SPV cluster 083 | 55 | 412 | 6.00E-115 | FabF_Bacillus_FAS | Fatty acid                           |
| KS 445 | 1286 | SPV cluster 071 | 48 | 439 | 2.00E-105 | EpoD_Q9L8C7_2mod  | Epothilone                           |
| KS 450 | 1292 | SPV cluster 412 | 37 | 439 | 6.00E-67  | FUMON_AAD43562_i  | Fumonisin                            |
| KS 451 | 1289 | SPV cluster 114 | 48 | 438 | 7.00E-102 | EpoD_Q9L8C7_2mod  | Epothilone                           |
| KS 456 | 1184 | SPV cluster 263 | 60 | 393 | 3.00E-123 | FabF_Ecoli_FAS    | Fatty acid                           |
| KS 457 | 1286 | SPV cluster 047 | 50 | 431 | 7.00E-104 | EpoD_Q9L8C7_2mod  | Epothilone                           |
| KS 458 | 1145 | SPV cluster 236 | 40 | 386 | 9.00E-51  | FabF_Bacillus_FAS | Fatty acid                           |
| KS 463 | 1190 | SPV cluster 066 | 51 | 398 | 7.00E-107 | FabF_Bacillus_FAS | Fatty acid                           |
| KS 464 | 1178 | SPV cluster 069 | 54 | 391 | 6.00E-100 | FabF_Bacillus_FAS | Fatty acid                           |
| KS 467 | 1196 | SPV cluster 364 | 50 | 408 | 4.00E-110 | FabF_Bacillus_FAS | Fatty acid                           |
| KS 470 | 977  | SPV cluster 330 | 49 | 323 | 1.00E-81  | FabF_Bacillus_FAS | Fatty acid                           |
| KS 472 | 1211 | SPV cluster 259 | 51 | 401 | 3.00E-116 | FabF_Bacillus_FAS | Fatty acid                           |
| KS 475 | 1154 | SPV cluster 366 | 59 | 385 | 3.00E-126 | FabB_Ecoli_FAS    | Fatty acid                           |
| KS 477 | 1286 | SPV cluster 291 | 52 | 433 | 4.00E-106 | EpoD_Q9L8C7_2mod  | Epothilone                           |
| KS 478 | 1142 | SPV cluster 380 | 32 | 221 | 4.00E-24  | FabF_Bacillus_FAS | Fatty acid                           |
| KS 480 | 1199 | SPV cluster 334 | 53 | 394 | 4.00E-116 | FabF_Bacillus_FAS | Fatty acid                           |
| KS 482 | 1172 | SPV cluster 182 | 55 | 390 | 2.00E-119 | FabF_Bacillus_FAS | Fatty acid                           |
| KS 485 | 1298 | SPV cluster 226 | 51 | 434 | 2.00E-106 | EpoD_Q9L8C7_4mod  | Epothilone                           |
| KS 487 | 1112 | SPV cluster 179 | 45 | 358 | 3.00E-64  | FabF_Bacillus_FAS | Fatty acid                           |
| KS 489 | 1292 | SPV cluster 220 | 37 | 440 | 3.00E-68  | FUMON_AAD43562_i  | Fumonisin                            |
| KS 492 | 1172 | SPV cluster 240 | 46 | 387 | 1.00E-89  | FabF_Bacillus_FAS | Fatty acid                           |
| KS 493 | 1286 | SPV cluster 134 | 47 | 431 | 4.00E-107 | EpoD_Q9L8C7_2mod  | Epothilone                           |
| KS 496 | 1166 | SPV cluster 274 | 54 | 389 | 3.00E-116 | FabF_Bacillus_FAS | Fatty acid                           |
| KS 500 | 1286 | SPV cluster 278 | 52 | 438 | 1.00E-116 | EpoD_Q9L8C7_2mod  | Epothilone                           |
| KS 502 | 1286 | SPV cluster 213 | 50 | 434 | 5.00E-98  | EpoD_Q9L8C7_4mod  | Epothilone                           |
| KS 509 | 1292 | SPV cluster 154 | 51 | 437 | 2.00E-114 | EpoD_Q9L8C7_4mod  | Epothilone                           |
| KS 510 | 1292 | SPV cluster 020 | 52 | 432 | 3.00E-115 | EpoD_Q9L8C7_4mod  | Epothilone                           |
| KS 512 | 1292 | SPV cluster 264 | 38 | 444 | 2.00E-66  | HSAF_ABL86391_i   | HSAF (heat stable antifungal factor) |

|        |      |                 |    |     |           |                   |            |
|--------|------|-----------------|----|-----|-----------|-------------------|------------|
| KS 513 | 1160 | SPV cluster 316 | 54 | 385 | 1.00E-110 | FabF_Bacillus_FAS | Fatty acid |
| KS 515 | 1244 | SPV cluster 029 | 51 | 426 | 2.00E-105 | EpoD_Q9L8C7_2mod  | Epothilone |
| KS 522 | 1229 | SPV cluster 433 | 53 | 409 | 1.00E-109 | FabF_Bacillus_FAS | Fatty acid |
| KS 523 | 1283 | SPV cluster 208 | 52 | 429 | 1.00E-116 | EpoD_Q9L8C7_4mod  | Epothilone |
| KS 524 | 1286 | SPV cluster 051 | 50 | 430 | 3.00E-115 | EpoD_Q9L8C7_2mod  | Epothilone |
| KS 530 | 1292 | SPV cluster 174 | 49 | 429 | 4.00E-110 | EpoD_Q9L8C7_2mod  | Epothilone |
| KS 531 | 1058 | SPV cluster 337 | 48 | 258 | 5.00E-53  | FabF_Bacillus_FAS | Fatty acid |
| KS 533 | 1292 | SPV cluster 368 | 37 | 439 | 2.00E-67  | FUMON_AAD43562_i  | Fumonisin  |
| KS 534 | 1286 | SPV cluster 326 | 52 | 428 | 9.00E-116 | EpoD_Q9L8C7_2mod  | Epothilone |
| KS 535 | 1286 | SPV cluster 269 | 49 | 434 | 1.00E-103 | EpoD_Q9L8C7_4mod  | Epothilone |
| KS 539 | 1286 | SPV cluster 102 | 50 | 434 | 7.00E-114 | EpoD_Q9L8C7_2mod  | Epothilone |
| KS 542 | 1286 | SPV cluster 299 | 49 | 433 | 2.00E-104 | EpoD_Q9L8C7_2mod  | Epothilone |
| KS 544 | 1286 | SPV cluster 078 | 55 | 428 | 2.00E-115 | EpoD_Q9L8C7_4mod  | Epothilone |
| KS 547 | 1292 | SPV cluster 008 | 49 | 439 | 3.00E-113 | EpoD_Q9L8C7_2mod  | Epothilone |
| KS 552 | 1277 | SPV cluster 169 | 53 | 425 | 9.00E-120 | EpoD_Q9L8C7_4mod  | Epothilone |
| KS 556 | 1286 | SPV cluster 212 | 48 | 439 | 7.00E-105 | EpoD_Q9L8C7_2mod  | Epothilone |
| KS 560 | 1283 | SPV cluster 082 | 51 | 427 | 3.00E-110 | EpoF_Q9L8C5_1mod  | Epothilone |
| KS 561 | 1250 | SPV cluster 221 | 53 | 428 | 2.00E-104 | AveA2_Q9S0R7_4mod | Avermectin |
| KS 562 | 1292 | SPV cluster 151 | 49 | 428 | 1.00E-114 | EpoF_Q9L8C5_1mod  | Epothilone |
| KS 565 | 1259 | SPV cluster 030 | 56 | 427 | 3.00E-123 | EpoD_Q9L8C7_4mod  | Epothilone |
| KS 566 | 1286 | SPV cluster 311 | 47 | 437 | 1.00E-101 | EpoF_Q9L8C5_1mod  | Epothilone |
| KS 567 | 1301 | SPV cluster 246 | 51 | 432 | 3.00E-111 | EpoD_Q9L8C7_4mod  | Epothilone |
| KS 568 | 1166 | SPV cluster 250 | 38 | 350 | 7.00E-51  | FabB_Ecoli_FAS    | Fatty acid |
| KS 571 | 1082 | SPV cluster 376 | 38 | 348 | 3.00E-52  | FabB_Ecoli_FAS    | Fatty acid |
| KS 574 | 1292 | SPV cluster 052 | 50 | 433 | 6.00E-112 | EpoD_Q9L8C7_2mod  | Epothilone |
| KS 578 | 1178 | SPV cluster 094 | 36 | 405 | 4.00E-53  | FabF_Bacillus_FAS | Fatty acid |
| KS 582 | 1010 | SPV cluster 137 | 35 | 209 | 6.00E-31  | FabF_Bacillus_FAS | Fatty acid |
| KS 584 | 1025 | SPV cluster 136 | 37 | 260 | 1.00E-38  | FabF_Bacillus_FAS | Fatty acid |
| KS 587 | 1184 | SPV cluster 123 | 35 | 376 | 8.00E-52  | FabF_Bacillus_FAS | Fatty acid |
| KS 589 | 1259 | SPV cluster 338 | 50 | 425 | 1.00E-110 | EpoD_Q9L8C7_2mod  | Epothilone |
| KS 592 | 1277 | SPV cluster 106 | 53 | 428 | 5.00E-121 | EpoD_Q9L8C7_4mod  | Epothilone |
| KS 594 | 293  | SPV cluster 111 | 51 | 93  | 1.00E-24  | NysJ_Q9L4X2_2mod  | Nystatin   |

|        |      |                 |    |     |           |                       |              |
|--------|------|-----------------|----|-----|-----------|-----------------------|--------------|
| KS 595 | 1259 | SPV cluster 357 | 51 | 425 | 5.00E-109 | EpoD_Q9L8C7_2mod      | Epothilone   |
| KS 597 | 1256 | SPV cluster 309 | 51 | 422 | 1.00E-98  | EpoD_Q9L8C7_4mod      | Epothilone   |
| KS 598 | 1259 | SPV cluster 394 | 51 | 422 | 6.00E-111 | EpoD_Q9L8C7_4mod      | Epothilone   |
| KS 600 | 1079 | SPV cluster 145 | 28 | 336 | 2.00E+00  | FabF_Bacillus_FAS     | Fatty acid   |
| KS 601 | 992  | SPV cluster 261 | 30 | 259 | 3.00E+00  | FabB_Streptomyces_FAS | Fatty acid   |
| KS 604 | 851  | SPV cluster 016 | 25 | 269 | 1.00E+00  | FabF_Bacillus_FAS     | Fatty acid   |
| KS 606 | 653  | SPV cluster 348 | 59 | 215 | 1.00E-69  | EpoD_Q9L8C7_1mod      | Epothilone   |
| KS 610 | 287  | SPV cluster 459 | 63 | 92  | 2.00E-29  | EpoD_Q9L8C7_4mod      | Epothilone   |
| KS 612 | 1256 | SPV cluster 106 | 52 | 435 | 5.00E-113 | TetF_BAE93731_2mod    | Tetronomycin |
| KS 622 | 1259 | SPV cluster 315 | 44 | 427 | 2.00E-92  | EpoD_Q9L8C7_2mod      | Epothilone   |
| KS 623 | 1259 | SPV cluster 305 | 51 | 425 | 3.00E-110 | EpoD_Q9L8C7_4mod      | Epothilone   |
| KS 624 | 1259 | SPV cluster 266 | 49 | 422 | 3.00E-105 | EpoD_Q9L8C7_4mod      | Epothilone   |
| KS 629 | 1259 | SPV cluster 314 | 54 | 423 | 8.00E-119 | EpoD_Q9L8C7_4mod      | Epothilone   |
| KS 631 | 1235 | SPV cluster 377 | 55 | 423 | 2.00E-106 | EpoD_Q9L8C7_4mod      | Epothilone   |
| KS 632 | 1259 | SPV cluster 167 | 51 | 424 | 3.00E-107 | EpoD_Q9L8C7_4mod      | Epothilone   |
| KS 634 | 1265 | SPV cluster 030 | 54 | 424 | 3.00E-119 | EpoD_Q9L8C7_4mod      | Epothilone   |
| KS 635 | 1262 | SPV cluster 030 | 54 | 424 | 8.00E-121 | EpoD_Q9L8C7_4mod      | Epothilone   |
| KS 639 | 1259 | SPV cluster 260 | 50 | 422 | 5.00E-113 | EpoD_Q9L8C7_4mod      | Epothilone   |
| KS 641 | 1259 | SPV cluster 052 | 50 | 425 | 1.00E-113 | EpoD_Q9L8C7_2mod      | Epothilone   |
| KS 648 | 1265 | SPV cluster 211 | 50 | 427 | 1.00E-112 | EpoD_Q9L8C7_2mod      | Epothilone   |
| KS 651 | 1256 | SPV cluster 227 | 50 | 422 | 8.00E-107 | EpoD_Q9L8C7_4mod      | Epothilone   |
| KS 653 | 1259 | SPV cluster 306 | 50 | 422 | 2.00E-112 | EpoD_Q9L8C7_4mod      | Epothilone   |
| KS 656 | 1244 | SPV cluster 237 | 51 | 436 | 3.00E-107 | EpoD_Q9L8C7_2mod      | Epothilone   |
| KS 658 | 1259 | SPV cluster 030 | 53 | 421 | 8.00E-119 | EpoF_Q9L8C5_1mod      | Epothilone   |
| KS 663 | 1259 | SPV cluster 206 | 49 | 427 | 4.00E-103 | TetF_BAE93731_2mod    | Tetronomycin |
| KS 665 | 1259 | SPV cluster 210 | 53 | 426 | 5.00E-115 | EpoA_Q9L8C9_mod       | Epothilone   |
| KS 667 | 1259 | SPV cluster 181 | 51 | 425 | 6.00E-111 | EpoD_Q9L8C7_4mod      | Epothilone   |
| KS 675 | 1268 | SPV cluster 030 | 55 | 421 | 2.00E-115 | EpoF_Q9L8C5_1mod      | Epothilone   |
| KS 676 | 1259 | SPV cluster 082 | 51 | 427 | 1.00E-113 | EpoD_Q9L8C7_2mod      | Epothilone   |
| KS 678 | 1253 | SPV cluster 221 | 50 | 420 | 3.00E-106 | EpoF_Q9L8C5_1mod      | Epothilone   |
| KS 680 | 1277 | SPV cluster 030 | 52 | 424 | 4.00E-117 | EpoD_Q9L8C7_4mod      | Epothilone   |
| KS 684 | 1268 | SPV cluster 030 | 56 | 424 | 3.00E-120 | EpoD_Q9L8C7_4mod      | Epothilone   |

|        |      |                 |    |     |           |                     |              |
|--------|------|-----------------|----|-----|-----------|---------------------|--------------|
| KS 686 | 1256 | SPV cluster 191 | 54 | 428 | 3.00E-116 | EpoD_Q9L8C7_4mod    | Epothilone   |
| KS 687 | 1259 | SPV cluster 051 | 52 | 423 | 7.00E-115 | EpoD_Q9L8C7_4mod    | Epothilone   |
| KS 690 | 1259 | SPV cluster 096 | 52 | 422 | 2.00E-114 | EpoD_Q9L8C7_4mod    | Epothilone   |
| KS 694 | 1259 | SPV cluster 057 | 53 | 424 | 5.00E-113 | EpoD_Q9L8C7_4mod    | Epothilone   |
| KS 696 | 1259 | SPV cluster 171 | 53 | 428 | 3.00E-115 | EpoD_Q9L8C7_2mod    | Epothilone   |
| KS 698 | 1259 | SPV cluster 040 | 48 | 427 | 2.00E-111 | EpoD_Q9L8C7_2mod    | Epothilone   |
| KS 699 | 1259 | SPV cluster 214 | 48 | 427 | 3.00E-107 | EpoD_Q9L8C7_2mod    | Epothilone   |
| KS 702 | 1271 | SPV cluster 029 | 54 | 427 | 8.00E-120 | TetE_BAE93730_1mod  | Tetronomycin |
| KS 703 | 1259 | SPV cluster 134 | 48 | 424 | 1.00E-111 | EpoD_Q9L8C7_4mod    | Epothilone   |
| KS 706 | 1259 | SPV cluster 035 | 52 | 422 | 1.00E-115 | EpoD_Q9L8C7_4mod    | Epothilone   |
| KS 709 | 1265 | SPV cluster 071 | 52 | 424 | 1.00E-100 | EpoD_Q9L8C7_4mod    | Epothilone   |
| KS 710 | 1262 | SPV cluster 114 | 53 | 425 | 4.00E-112 | EpoD_Q9L8C7_4mod    | Epothilone   |
| KS 711 | 1259 | SPV cluster 084 | 48 | 427 | 2.00E-103 | EpoD_Q9L8C7_2mod    | Epothilone   |
| KS 713 | 1259 | SPV cluster 146 | 52 | 427 | 5.00E-117 | EpoD_Q9L8C7_2mod    | Epothilone   |
| KS 716 | 1259 | SPV cluster 020 | 50 | 427 | 1.00E-111 | EpoD_Q9L8C7_2mod    | Epothilone   |
| KS 717 | 1265 | SPV cluster 047 | 48 | 428 | 3.00E-101 | EpoD_Q9L8C7_2mod    | Epothilone   |
| KS 718 | 1259 | SPV cluster 154 | 51 | 423 | 5.00E-112 | EpoD_Q9L8C7_4mod    | Epothilone   |
| KS 721 | 1211 | SPV cluster 149 | 49 | 411 | 1.00E-101 | EpoF_Q9L8C5_1mod    | Epothilone   |
| KS 722 | 1259 | SPV cluster 245 | 54 | 433 | 9.00E-120 | EpoD_Q9L8C7_4mod    | Epothilone   |
| KS 725 | 1259 | SPV cluster 150 | 50 | 423 | 2.00E-112 | EpoD_Q9L8C7_4mod    | Epothilone   |
| KS 731 | 1262 | SPV cluster 151 | 49 | 425 | 2.00E-102 | EpoD_Q9L8C7_4mod    | Epothilone   |
| KS 734 | 1259 | SPV cluster 174 | 50 | 422 | 1.00E-104 | EpoD_Q9L8C7_4mod    | Epothilone   |
| KS 736 | 1259 | SPV cluster 005 | 50 | 424 | 4.00E-112 | NysI_Q9L4X3_5mod    | Nystatin     |
| KS 737 | 1277 | SPV cluster 169 | 53 | 435 | 2.00E-114 | EpoD_Q9L8C7_4mod    | Epothilone   |
| KS 739 | 1259 | SPV cluster 102 | 49 | 424 | 6.00E-108 | EpoD_Q9L8C7_4mod    | Epothilone   |
| KS 740 | 1262 | SPV cluster 246 | 50 | 428 | 1.00E-105 | EpoD_Q9L8C7_4mod    | Epothilone   |
| KS 742 | 1262 | SPV cluster 115 | 48 | 424 | 3.00E-107 | TetE_BAE93730_1mod  | Tetronomycin |
| KS 743 | 1262 | SPV cluster 241 | 48 | 424 | 1.00E-106 | TetE_BAE93730_1mod  | Tetronomycin |
| KS 745 | 1259 | SPV cluster 078 | 52 | 424 | 3.00E-99  | EpoD_Q9L8C7_4mod    | Epothilone   |
| KS 748 | 1262 | SPV cluster 168 | 48 | 429 | 2.00E-107 | TetE_BAE93730_1mod  | Tetronomycin |
| KS 750 | 1319 | SPV cluster 008 | 48 | 444 | 6.00E-108 | EpoD_Q9L8C7_4mod    | Epothilone   |
| KS 752 | 176  | SPV cluster 457 | 54 | 56  | 5.00E+00  | TylGIII_O33956_2mod | Tylosin      |

|        |      |                 |    |     |           |                  |            |
|--------|------|-----------------|----|-----|-----------|------------------|------------|
| KS 753 | 1262 | SPV cluster 030 | 54 | 425 | 5.00E-122 | EpoD_Q9L8C7_2mod | Epothilone |
| KS 756 | 1250 | SPV cluster 030 | 53 | 428 | 4.00E-116 | EpoD_Q9L8C7_2mod | Epothilone |
| KS 760 | 1268 | SPV cluster 029 | 57 | 430 | 1.00E-117 | EpoD_Q9L8C7_4mod | Epothilone |
| KS 762 | 1277 | SPV cluster 106 | 51 | 424 | 5.00E-112 | NysJ_Q9L4X2_2mod | Nystatin   |

Table S8. BLAST search of the KS sequences from the metagenome of *C. reinwardti* against the nr database in NCBI

| KS ID  | Length (nt) | BGC ID          | Identity (%) | Alignment length (aa) | E-value   | Sponge-specific cluster | The homologous sequences                                                                       | Accession number |
|--------|-------------|-----------------|--------------|-----------------------|-----------|-------------------------|------------------------------------------------------------------------------------------------|------------------|
| KS_013 | 792         | CLR_cluster_248 | 75.769       | 260                   | 3.50E-131 | SupA                    | SupA [Theonella swinhoei bacterial symbiont clone pSW1H8]                                      | ABE03935         |
| KS_029 | 1194        | CLR_cluster_183 | 83.709       | 399                   | 0         | SupA                    | SupA [Aplysina aerophoba bacterial symbiont clone pAPKS18]                                     | ABE03915         |
| KS_030 | 792         | CLR_cluster_249 | 76.154       | 260                   | 1.52E-131 | SupA                    | SupA [Theonella swinhoei bacterial symbiont clone pSW1H8]                                      | ABE03935         |
| KS_032 | 327         | CLR_cluster_265 | 81.308       | 107                   | 6.47E-52  | SwfA                    | Type I polyketide synthase [bacterium symbiont of Plakortis simplex pPS11G3]                   | AGH13577         |
| KS_039 | 1269        | CLR_cluster_225 | 64.439       | 419                   | 4.33E-173 | SupA                    | SupA [uncultured marine bacterium 1k6]                                                         | ACX49735         |
| KS_041 | 975         | CLR_cluster_202 | 61.25        | 320                   | 1.46E-117 |                         | SA1_PKSA [uncultured bacterial symbiont of Discodermia dissoluta]                              | AAAY00025        |
| KS_044 | 363         | CLR_cluster_181 | 76.471       | 119                   | 1.32E-54  | SupA                    | SupA [Theonella swinhoei bacterial symbiont clone pSW1H8]                                      | ABE03935         |
| KS_061 | 1113        | CLR_cluster_192 | 82.289       | 367                   | 0         | SupA                    | SupA [Theonella swinhoei bacterial symbiont clone pSW1H8]                                      | ABE03935         |
| KS_064 | 1221        | CLR_cluster_021 | 74.568       | 405                   | 0         |                         | SA1_PKSA [uncultured bacterial symbiont of Discodermia dissoluta]                              | AAAY00025        |
| KS_066 | 702         | CLR_cluster_246 | 76.623       | 231                   | 1.76E-111 | SupA                    | SupA [Aplysina aerophoba bacterial symbiont clone pAPKS18]                                     | ABE03915         |
| KS_073 | 1112        | CLR_cluster_222 | 80.488       | 369                   | 0         |                         | Putative polyketide synthase [uncultured bacterium 2063G]                                      | ABB73286         |
| KS_078 | 1064        | CLR_cluster_252 | 78.917       | 351                   | 0         |                         | 3-Oxoacyl-[acyl-carrier-protein] synthase 2 [Alphaproteobacteria bacterium MarineAlpha10 Bin2] | PPR24356         |
| KS_079 | 713         | CLR_cluster_062 | 79.638       | 221                   | 1.43E-110 | SwfA                    | Type I polyketide synthase [bacterium symbiont of Plakortis simplex pPS11G3]                   | AGH13577         |
| KS_084 | 977         | CLR_cluster_279 | 49.296       | 213                   | 1.09E-62  |                         | 3-Oxoacyl-[acyl-carrier-protein] synthase II [Chloroflexi bacterium]                           | PZC49279         |
| KS_095 | 1049        | CLR_cluster_281 | 71.06        | 349                   | 1.41E-178 |                         | Beta-ketoacyl-[acyl-carrier-protein] synthase II [Gammaproteobacteria bacterium]               | TDJ41741         |
| KS_101 | 1100        | CLR_cluster_081 | 52.61        | 249                   | 6.33E-79  |                         | Putative Beta-ketoacyl synthase [Sorangium cellulosum So ce56]                                 | CAN93510         |
| KS_102 | 1097        | CLR_cluster_105 | 49.57        | 349                   | 2.55E-96  |                         | Putative Beta-ketoacyl synthase [Sorangium cellulosum So ce56]                                 | CAN93510         |
| KS_105 | 1223        | CLR_cluster_122 | 94.363       | 408                   | 0         |                         | Beta-ketoacyl-[acyl-carrier-protein] synthase II [Candidatus Poribacteria bacterium]           | RKU30153         |
| KS_106 | 1223        | CLR_cluster_041 | 87.5         | 408                   | 0         |                         | Beta-ketoacyl-[acyl-carrier-protein] synthase II [Candidatus Poribacteria bacterium]           | RKU31990         |
| KS_111 | 1223        | CLR_cluster_006 | 82.02        | 406                   | 0         |                         | Beta-ketoacyl-ACP synthase II [Thioalkalivibrio sp. HK1]                                       | WP_038098656     |
| KS_115 | 1223        | CLR_cluster_007 | 93.857       | 407                   | 0         |                         | Beta-ketoacyl-[acyl-carrier-protein] synthase II [Candidatus Poribacteria bacterium]           | RKU31990         |
| KS_116 | 1202        | CLR_cluster_110 | 73.116       | 398                   | 0         |                         | 3-Oxoacyl-ACP synthase [OM182 bacterium BACL3 MAG-120507-bin80]                                | KRO71573         |
| KS_117 | 1250        | CLR_cluster_086 | 73.366       | 413                   | 0         |                         | Beta-ketoacyl-ACP synthase II [Rhodospirillales bacterium]                                     | WP_027300572     |

|        |      |                 |        |     |           |  |                                                                                                           |              |
|--------|------|-----------------|--------|-----|-----------|--|-----------------------------------------------------------------------------------------------------------|--------------|
|        |      |                 |        |     |           |  | URHD0088]                                                                                                 |              |
| KS_120 | 1226 | CLR_cluster_193 | 58.333 | 408 | 5.12E-174 |  | Beta-ketoacyl-[acyl-carrier-protein] synthase II [SAR202 cluster bacterium Casp-Chloro-G4]                | PKB61328     |
| KS_126 | 1184 | CLR_cluster_230 | 75.949 | 395 | 0         |  | Beta-ketoacyl-ACP synthase I [Methyloarcula marina]                                                       | WP_106692425 |
| KS_134 | 1199 | CLR_cluster_253 | 67.506 | 397 | 0         |  | Beta-ketoacyl-[acyl-carrier-protein] synthase family protein [Halocynthiaibacter namhaensis]              | WP_039018003 |
| KS_138 | 1223 | CLR_cluster_097 | 93.366 | 407 | 0         |  | Beta-ketoacyl-[acyl-carrier-protein] synthase II [Candidatus Poribacteria bacterium]                      | RKU30153     |
| KS_142 | 1208 | CLR_cluster_126 | 78.164 | 403 | 0         |  | 3-Oxoacyl-[acyl-carrier-protein] synthase 1 [Alphaproteobacteria bacterium MarineAlpha3_Bin7]             | PPR64109     |
| KS_146 | 1223 | CLR_cluster_082 | 75.862 | 406 | 0         |  | Beta-ketoacyl-[acyl-carrier-protein] synthase II [Gammaproteobacteria bacterium]                          | TDJ17613     |
| KS_150 | 1196 | CLR_cluster_127 | 70.603 | 398 | 0         |  | Beta-ketoacyl-[acyl-carrier-protein] synthase I [OM182 bacterium MED-G28]                                 | PDH34065     |
| KS_154 | 1223 | CLR_cluster_013 | 64.619 | 407 | 0         |  | 3-Oxoacyl-ACP synthase [candidate division Zixibacteria bacterium SM23_81]                                | KPL19508     |
| KS_159 | 1223 | CLR_cluster_101 | 81.818 | 407 | 0         |  | Beta-ketoacyl-[acyl-carrier-protein] synthase II [bacterium]                                              | RZP29941     |
| KS_163 | 1229 | CLR_cluster_065 | 68.447 | 412 | 0         |  | Beta-ketoacyl-[acyl-carrier-protein] synthase II [Gemmatimonadetes bacterium]                             | RMH15744     |
| KS_170 | 1217 | CLR_cluster_085 | 69.136 | 405 | 0         |  | 3-Oxoacyl-[acyl-carrier-protein] synthase 2 [bacterium HR37]                                              | GBD38054     |
| KS_179 | 1202 | CLR_cluster_257 | 73.684 | 399 | 0         |  | Beta-ketoacyl-[acyl-carrier-protein] synthase I [Gammaproteobacteria bacterium RIFCSPLOWO2_02_FULL_61_13] | OGT79717     |
| KS_183 | 1223 | CLR_cluster_165 | 94.103 | 407 | 0         |  | Beta-ketoacyl-[acyl-carrier-protein] synthase II [Candidatus Poribacteria bacterium]                      | RKU10113     |
| KS_196 | 1280 | CLR_cluster_139 | 64.623 | 424 | 1.87E-173 |  | Hypothetical protein A3I72_03985 [Candidatus Tectomicrobia bacterium RIFCSPLOWO2_02_FULL_70_19]           | OGL60875     |
| KS_198 | 1223 | CLR_cluster_001 | 71.253 | 407 | 0         |  | MULTISPECIES: Beta-ketoacyl-ACP synthase II [Ectothiorhodospira]                                          | WP_025281708 |
| KS_199 | 1157 | CLR_cluster_264 | 62.565 | 382 | 8.48E-158 |  | Beta-ketoacyl synthase [Actinobacteria bacterium]                                                         | RUA23523     |
| KS_201 | 1226 | CLR_cluster_022 | 61.52  | 408 | 7.39E-180 |  | Beta-ketoacyl synthase [Nitrosomonas europaea]                                                            | KXK43820     |
| KS_204 | 1163 | CLR_cluster_064 | 68.325 | 382 | 0         |  | Beta-ketoacyl-[acyl-carrier-protein] synthase II [Gammaproteobacteria bacterium]                          | TDJ41741     |
| KS_206 | 1226 | CLR_cluster_143 | 62.162 | 407 | 0         |  | Beta-ketoacyl-[acyl-carrier-protein] synthase II [Proteobacteria bacterium]                               | PZN30994     |
| KS_208 | 1223 | CLR_cluster_179 | 68.395 | 405 | 0         |  | Beta-ketoacyl-[acyl-carrier-protein] synthase II [Acidobacteria bacterium]                                | RPH64142     |
| KS_212 | 1217 | CLR_cluster_190 | 69.136 | 405 | 0         |  | 3-Oxoacyl-[acyl-carrier-protein] synthase 2 [bacterium HR37]                                              | GBD38054     |
| KS_217 | 1217 | CLR_cluster_015 | 70.968 | 403 | 0         |  | Beta-ketoacyl-[acyl-carrier-protein] synthase II [Gammaproteobacteria bacterium]                          | TDJ36329     |
| KS_221 | 1064 | CLR_cluster_102 | 70.566 | 265 | 1.35E-131 |  | 3-Oxoacyl-ACP synthase [Ralstonia pickettii DTP0602]                                                      | AGW95093     |



|        |      |                 |        |     |           |      |                                                                                               |              |
|--------|------|-----------------|--------|-----|-----------|------|-----------------------------------------------------------------------------------------------|--------------|
| KS_222 | 1229 | CLR_cluster_134 | 58.477 | 407 | 1.39E-150 |      | Beta-ketoacyl-[acyl-carrier-protein] synthase II [Deltaproteobacteria bacterium]              | TDJ21427     |
| KS_227 | 1217 | CLR_cluster_220 | 69.136 | 405 | 0         |      | Beta-ketoacyl-[acyl-carrier-protein] synthase II [Gammaproteobacteria bacterium RBG_16_51_14] | OGT30519     |
| KS_231 | 1217 | CLR_cluster_049 | 69.458 | 406 | 0         |      | Beta-ketoacyl-[acyl-carrier-protein] synthase II [Gammaproteobacteria bacterium RBG_16_51_14] | OGT30519     |
| KS_232 | 1223 | CLR_cluster_224 | 67.734 | 406 | 0         |      | Beta-ketoacyl-[acyl-carrier-protein] synthase II [Gammaproteobacteria bacterium]              | TDJ29040     |
| KS_239 | 1226 | CLR_cluster_166 | 61.425 | 407 | 4.00E-179 |      | MULTISPECIES: Beta-ketoacyl-ACP synthase II [Pseudomonadaceae]                                | WP_096004673 |
| KS_247 | 1223 | CLR_cluster_162 | 71.429 | 406 | 0         |      | Beta-ketoacyl-[acyl-carrier-protein] synthase II [OM182 bacterium MED-G28]                    | PDH35184     |
| KS_250 | 1340 | CLR_cluster_014 | 53.437 | 451 | 7.41E-146 |      | Hypothetical protein D7X12_09075, partial [Corallococcus sicarius]                            | RKH45034     |
| KS_253 | 1229 | CLR_cluster_228 | 65.366 | 410 | 0         |      | Beta-ketoacyl-[acyl-carrier-protein] synthase II [Gemmatimonadetes bacterium]                 | RMH15744     |
| KS_262 | 1220 | CLR_cluster_045 | 68.966 | 406 | 0         |      | Beta-ketoacyl-[acyl-carrier-protein] synthase II [Acidobacteria bacterium]                    | RMH20421     |
| KS_263 | 1292 | CLR_cluster_076 | 78.322 | 429 | 0         | SwfA | Type I polyketide synthase [bacterium symbiont of Plakortis simplex pPSA11D7]                 | AGH13590     |
| KS_266 | 1151 | CLR_cluster_140 | 78.272 | 382 | 0         |      | Beta-ketoacyl synthase [Acidimicrobiales bacterium MED-G01]                                   | PDH69975     |
| KS_279 | 1229 | CLR_cluster_147 | 62.347 | 409 | 0         |      | Beta-ketoacyl-ACP synthase II [Nitrosomonas aestuarii]                                        | WP_090702733 |
| KS_283 | 1286 | CLR_cluster_131 | 64.371 | 421 | 0         |      | SDR family NAD(P)-dependent oxidoreductase [Cocleimonas flava]                                | WP_131906443 |
| KS_284 | 1292 | CLR_cluster_108 | 83.411 | 428 | 0         | SwfA | Type I polyketide synthase [bacterium symbiont of Plakortis simplex pPSA11D7]                 | AGH13590     |
| KS_294 | 1223 | CLR_cluster_060 | 69.779 | 407 | 0         |      | Beta-ketoacyl-[acyl-carrier-protein] synthase II [Polyangiaceae bacterium UTPRO1]             | OQY68774     |
| KS_302 | 1154 | CLR_cluster_043 | 51.558 | 353 | 8.38E-110 |      | Hypothetical protein [Pelagimonas phthalica]                                                  | WP_099241578 |
| KS_309 | 1160 | CLR_cluster_114 | 70.605 | 347 | 1.84E-166 |      | Beta-ketoacyl synthase [Actinobacteria bacterium]                                             | RUA23523     |
| KS_311 | 1259 | CLR_cluster_137 | 71.599 | 419 | 0         |      | Beta-ketoacyl-[acyl-carrier-protein] synthase family protein [Deltaproteobacteria bacterium]  | TDJ13656     |
| KS_314 | 1160 | CLR_cluster_214 | 70.893 | 347 | 1.48E-168 |      | Beta-ketoacyl synthase [Actinobacteria bacterium]                                             | RUA23523     |
| KS_322 | 1214 | CLR_cluster_098 | 67.822 | 404 | 0         |      | Beta-ketoacyl-[acyl-carrier-protein] synthase II [Chloroflexi bacterium]                      | RME76096     |
| KS_325 | 1286 | CLR_cluster_056 | 80.328 | 427 | 0         |      | Putative polyketide synthase [uncultured bacterium 2063G]                                     | ABB73286     |
| KS_327 | 1154 | CLR_cluster_009 | 53.786 | 383 | 3.88E-131 |      | Hypothetical protein [Pelagimonas phthalica]                                                  | WP_099241578 |
| KS_329 | 1160 | CLR_cluster_069 | 69.713 | 383 | 0         |      | Beta-ketoacyl synthase [Actinobacteria bacterium]                                             | RUA23523     |
| KS_330 | 1223 | CLR_cluster_201 | 66.585 | 407 | 0         |      | Beta-ketoacyl-[acyl-carrier-protein] synthase II [Chloroflexi bacterium]                      | TDI92680     |
| KS_334 | 1229 | CLR_cluster_079 | 67.397 | 411 | 0         |      | Beta-ketoacyl-[acyl-carrier-protein] synthase II [Gemmatimonadetes bacterium]                 | RMH15744     |

|        |      |                 |        |     |           |      |                                                                                                |              |
|--------|------|-----------------|--------|-----|-----------|------|------------------------------------------------------------------------------------------------|--------------|
| KS_338 | 1292 | CLR_cluster_133 | 75.058 | 429 | 0         | SwfA | Type I polyketide synthase [bacterium symbiont of Plakortis simplex pPSA11D7]                  | AGH13590     |
| KS_340 | 1154 | CLR_cluster_118 | 59.791 | 383 | 1.03E-161 |      | Beta-ketoacyl synthase [Acidimicrobiaceae bacterium TMED77]                                    | OUV00831     |
| KS_342 | 1292 | CLR_cluster_089 | 75.991 | 429 | 0         | SwfA | Type I polyketide synthase [bacterium symbiont of Plakortis simplex pPSA11D7]                  | AGH13590     |
| KS_346 | 1229 | CLR_cluster_096 | 69.343 | 411 | 0         |      | Beta-ketoacyl-[acyl-carrier-protein] synthase II [Gemmatimonadetes bacterium]                  | RMH15744     |
| KS_354 | 1232 | CLR_cluster_231 | 70     | 410 | 0         |      | Beta-ketoacyl-ACP synthase II [Rhodothermus marinus]                                           | WP_014068140 |
| KS_358 | 1292 | CLR_cluster_055 | 71.852 | 405 | 0         | SwfA | Type I polyketide synthase [bacterium symbiont of Plakortis simplex pPSA11D7]                  | AGH13590     |
| KS_364 | 1292 | CLR_cluster_027 | 61.593 | 427 | 7.04E-175 | SwfA | Type I polyketide synthase [bacterium symbiont of Plakortis simplex pPSA11D7]                  | AGH13590     |
| KS_366 | 1229 | CLR_cluster_025 | 67.64  | 411 | 0         |      | Beta-ketoacyl-[acyl-carrier-protein] synthase II [Gemmatimonadetes bacterium]                  | RMH15744     |
| KS_368 | 1247 | CLR_cluster_204 | 75.061 | 413 | 0         |      | 3-Oxoacyl-[acyl-carrier-protein] synthase 2 [Alphaproteobacteria bacterium MarineAlpha10_Bin2] | PPR24356     |
| KS_372 | 1298 | CLR_cluster_132 | 78.089 | 429 | 0         | SwfA | Type I polyketide synthase [bacterium symbiont of Plakortis simplex pPSA11D7]                  | AGH13590     |
| KS_373 | 1220 | CLR_cluster_030 | 76.733 | 404 | 0         |      | Beta-ketoacyl-[acyl-carrier-protein] synthase II [Nitrospirae bacterium]                       | TAJ27615     |
| KS_375 | 1100 | CLR_cluster_032 | 52.381 | 252 | 7.01E-80  |      | Putative Beta-ketoacyl synthase [Sorangium cellulosum So ce56]                                 | CAN93510     |
| KS_376 | 1007 | CLR_cluster_275 | 60.778 | 334 | 1.05E-148 |      | Beta-ketoacyl-[acyl-carrier-protein] synthase II [Chloroflexi bacterium TMED70]                | OOU77203     |
| KS_382 | 1292 | CLR_cluster_087 | 77.622 | 429 | 0         | SwfA | Type I polyketide synthase [bacterium symbiont of Plakortis simplex pPSA11D7]                  | AGH13590     |
| KS_384 | 1220 | CLR_cluster_261 | 62.654 | 407 | 0         |      | Beta-ketoacyl-[acyl-carrier-protein] synthase II [Chloroflexi bacterium]                       | RMG78893     |
| KS_393 | 1247 | CLR_cluster_200 | 71.498 | 414 | 0         |      | Beta-ketoacyl-ACP synthase II [Rhodospirillaceae bacterium SYSU D60014]                        | WP_119459592 |
| KS_395 | 995  | CLR_cluster_262 | 75.229 | 327 | 4.79E-168 |      | 3-Oxoacyl-[acyl-carrier-protein] synthase 2 [bacterium HR40]                                   | GBD44717     |
| KS_403 | 1286 | CLR_cluster_135 | 91.569 | 427 | 0         |      | Putative polyketide synthase [uncultured bacterium 2063G]                                      | ABB73286     |
| KS_407 | 1184 | CLR_cluster_010 | 63.265 | 392 | 9.60E-171 |      | Beta-ketoacyl-[acyl-carrier-protein] synthase family protein [Pelagimonas phthalica]           | WP_099241574 |
| KS_412 | 1223 | CLR_cluster_191 | 58.333 | 408 | 4.30E-179 |      | Beta-ketoacyl-[acyl-carrier-protein] synthase II [Chloroflexi bacterium RBG_16_64_32]          | OGO48822     |
| KS_413 | 1184 | CLR_cluster_042 | 62.5   | 392 | 8.30E-169 |      | Beta-ketoacyl-[acyl-carrier-protein] synthase family protein [Pelagimonas phthalica]           | WP_099241574 |
| KS_414 | 1292 | CLR_cluster_106 | 88.038 | 418 | 0         | SwfA | Type I polyketide synthase [bacterium symbiont of Plakortis simplex pPS11G3]                   | AGH13577     |
| KS_417 | 965  | CLR_cluster_251 | 68.339 | 319 | 6.17E-152 |      | Beta-ketoacyl-[acyl-carrier-protein] synthase II [Chloroflexi bacterium]                       | RME76096     |
| KS_419 | 1286 | CLR_cluster_212 | 80.751 | 426 | 0         | SupA | SupA [uncultured marine bacterium 1k6]                                                         | ACX49735     |

|        |      |                 |        |     |           |      |                                                                                                                      |              |
|--------|------|-----------------|--------|-----|-----------|------|----------------------------------------------------------------------------------------------------------------------|--------------|
| KS_421 | 710  | CLR_cluster_278 | 77.637 | 237 | 3.95E-118 | SupA | SupA [Theonella swinhoei bacterial symbiont clone pSW1H8]                                                            | ABE03935     |
| KS_423 | 1064 | CLR_cluster_218 | 91.193 | 352 | 0         | SupA | SupA [Aplysina aerophoba bacterial symbiont clone pAPKS18]                                                           | ABE03915     |
| KS_424 | 1211 | CLR_cluster_104 | 76.19  | 399 | 0         |      | Beta-ketoacyl-ACP synthase II [Rhodospirillaceae bacterium SYSU D60014]                                              | WP_119459592 |
| KS_428 | 1292 | CLR_cluster_053 | 76.923 | 429 | 0         | SwfA | Type I polyketide synthase [bacterium symbiont of Plakortis simplex pPSA11D7]                                        | AGH13590     |
| KS_431 | 1235 | CLR_cluster_184 | 68.856 | 411 | 0         |      | Beta-ketoacyl-[acyl-carrier-protein] synthase II [Gemmatimonadetes bacterium]                                        | RMH15744     |
| KS_440 | 1286 | CLR_cluster_219 | 82.904 | 427 | 0         |      | Putative polyketide synthase [uncultured bacterium 2063G]                                                            | ABB73286     |
| KS_447 | 1292 | CLR_cluster_177 | 88.095 | 420 | 0         | SwfA | Type I polyketide synthase [bacterium symbiont of Plakortis simplex pPS11G3]                                         | AGH13577     |
| KS_454 | 1184 | CLR_cluster_121 | 72.237 | 389 | 0         |      | 3-Oxoacyl-ACP synthase [Candidatus Tenderia electrophaga]                                                            | ALP54806     |
| KS_455 | 1286 | CLR_cluster_203 | 67.529 | 425 | 0         | SupA | SupA [Aplysina aerophoba bacterial symbiont clone pAPKS18]                                                           | ABE03915     |
| KS_461 | 1211 | CLR_cluster_145 | 74.121 | 398 | 0         |      | Beta-ketoacyl-ACP synthase II [Telmatospirillum siberiense]                                                          | WP_101252614 |
| KS_465 | 983  | CLR_cluster_141 | 67.485 | 326 | 3.70E-159 |      | Beta-ketoacyl-ACP synthase II [Bryobacter aggregatus]                                                                | WP_031496688 |
| KS_466 | 1190 | CLR_cluster_128 | 69.424 | 399 | 0         |      | Beta-ketoacyl-ACP synthase II [Pararhodobacter aggregans]                                                            | WP_107749575 |
| KS_473 | 1175 | CLR_cluster_012 | 81.538 | 390 | 0         |      | Beta-ketoacyl-ACP synthase II [Thioalkalivibrio sp. HK1]                                                             | WP_038098656 |
| KS_479 | 1184 | CLR_cluster_112 | 71.688 | 385 | 0         |      | Beta-ketoacyl-[acyl-carrier-protein] synthase II [Candidatus Handelsmanbacteria bacterium RIFCSPLOWO2_12_FULL_64_10] | OGG49603     |
| KS_483 | 1112 | CLR_cluster_017 | 74.857 | 350 | 0         |      | Beta-ketoacyl synthase [Acidimicrobiales bacterium MED-G01]                                                          | PDH69975     |
| KS_488 | 1076 | CLR_cluster_277 | 61.281 | 359 | 2.06E-157 |      | Beta-ketoacyl-[acyl-carrier-protein] synthase II [Candidatus Handelsmanbacteria bacterium RIFCSPLOWO2_12_FULL_64_10] | OGG49603     |
| KS_503 | 1286 | CLR_cluster_174 | 78.454 | 427 | 0         | SupA | SupA [Theonella swinhoei bacterial symbiont clone pSW1H8]                                                            | ABE03935     |
| KS_504 | 1157 | CLR_cluster_176 | 75.198 | 379 | 0         | SwfA | Type I polyketide synthase [bacterium symbiont of Plakortis simplex pPSA11D7]                                        | AGH13590     |
| KS_505 | 1286 | CLR_cluster_005 | 79.859 | 427 | 0         | SupA | SupA [Theonella swinhoei bacterial symbiont clone pSW1H8]                                                            | ABE03935     |
| KS_508 | 1292 | CLR_cluster_107 | 87.857 | 420 | 0         | SwfA | Type I polyketide synthase [bacterium symbiont of Plakortis simplex pPS11G3]                                         | AGH13577     |
| KS_514 | 1184 | CLR_cluster_072 | 72.843 | 394 | 0         |      | Beta-ketoacyl-[acyl-carrier-protein] synthase II [Candidatus Tectomicrobia bacterium RIFCSPLOWO2_12_FULL_69_37]      | OGL61959     |
| KS_518 | 1244 | CLR_cluster_144 | 72.104 | 423 | 0         |      | SA1_PKSA [uncultured bacterial symbiont of Discodermia dissoluta]                                                    | AAAY00025    |
| KS_521 | 1220 | CLR_cluster_156 | 63.027 | 403 | 0         |      | Beta-ketoacyl-ACP synthase II [Albimonas donghaensis]                                                                | WP_092679786 |
| KS_527 | 1286 | CLR_cluster_149 | 80.986 | 426 | 0         | SupA | SupA [Aplysina aerophoba bacterial symbiont clone pAPKS18]                                                           | ABE03915     |
| KS_528 | 1292 | CLR_cluster_024 | 82.904 | 427 | 0         | SupA | SupA [Theonella swinhoei bacterial symbiont clone pSW1H8]                                                            | ABE03935     |
| KS_536 | 1292 | CLR_cluster_029 | 80.094 | 427 | 0         | SupA | SupA [Theonella swinhoei bacterial symbiont clone pSW1H8]                                                            | ABE03935     |

|        |      |                 |        |     |           |      |                                                                                                |              |
|--------|------|-----------------|--------|-----|-----------|------|------------------------------------------------------------------------------------------------|--------------|
| KS_537 | 1286 | CLR_cluster_153 | 76.581 | 427 | 0         | SupA | SupA [Theonella swinhoei bacterial symbiont clone pSW1H8]                                      | ABE03935     |
| KS_540 | 1286 | CLR_cluster_040 | 80.094 | 427 | 0         | SupA | SupA [Theonella swinhoei bacterial symbiont clone pSW1H8]                                      | ABE03935     |
| KS_546 | 1286 | CLR_cluster_159 | 88.263 | 426 | 0         | SupA | Polyketide synthase, partial [Aplysina aerophoba bacterial symbiont clone pAE27P20]            | ABE03895     |
| KS_549 | 1283 | CLR_cluster_123 | 87.324 | 426 | 0         | SupA | SupA [Aplysina aerophoba bacterial symbiont clone pAPKS18]                                     | ABE03915     |
| KS_550 | 1277 | CLR_cluster_066 | 74.533 | 428 | 0         |      | SA1_PKSA [uncultured bacterial symbiont of Discodermia dissoluta]                              | AAAY00025    |
| KS_557 | 1301 | CLR_cluster_194 | 75     | 428 | 0         | SupA | SupA [Aplysina aerophoba bacterial symbiont clone pAPKS18]                                     | ABE03915     |
| KS_558 | 1250 | CLR_cluster_059 | 70.29  | 414 | 1.36E-178 |      | SA1_PKSA [uncultured bacterial symbiont of Discodermia dissoluta]                              | AAAY00025    |
| KS_563 | 1292 | CLR_cluster_034 | 86.651 | 427 | 0         | SupA | SupA [Theonella swinhoei bacterial symbiont clone pSW1H8]                                      | ABE03935     |
| KS_564 | 1286 | CLR_cluster_124 | 82.436 | 427 | 0         | SupA | SupA [Theonella swinhoei bacterial symbiont clone pSW1H8]                                      | ABE03935     |
| KS_576 | 1094 | CLR_cluster_232 | 60.665 | 361 | 1.16E-162 |      | Beta-ketoacyl-[acyl-carrier-protein] synthase II [Chloroflexi bacterium]                       | PZN55531     |
| KS_579 | 1178 | CLR_cluster_008 | 61.675 | 394 | 3.52E-156 |      | Beta-ketoacyl-[acyl-carrier-protein] synthase family protein [Verminephrobacter aporrectodeae] | WP_081479930 |
| KS_580 | 1010 | CLR_cluster_070 | 55.67  | 194 | 3.63E-63  |      | Beta-ketoacyl-ACP synthase [Xanthomonadaceae bacterium]                                        | RYD16404     |
| KS_585 | 989  | CLR_cluster_221 | 66.116 | 242 | 1.98E-105 |      | Beta-ketoacyl-[acyl-carrier-protein] synthase family protein [Parasulfuritortus cantonensis]   | WP_131445552 |
| KS_586 | 1184 | CLR_cluster_044 | 59.836 | 366 | 3.15E-136 |      | Beta-ketoacyl-[acyl-carrier-protein] synthase family protein [Verminephrobacter aporrectodeae] | WP_081479930 |
| KS_590 | 1094 | CLR_cluster_020 | 79.945 | 364 | 0         |      | SA1_PKSA [uncultured bacterial symbiont of Discodermia dissoluta]                              | AAAY00025    |
| KS_591 | 1283 | CLR_cluster_026 | 74.941 | 423 | 0         |      | SA1_PKSA [uncultured bacterial symbiont of Discodermia dissoluta]                              | AAAY00025    |
| KS_602 | 722  | CLR_cluster_247 | 79.412 | 238 | 5.35E-118 | SwfA | Type I polyketide synthase [bacterium symbiont of Plakortis simplex pPS11G3]                   | AGH13577     |
| KS_605 | 851  | CLR_cluster_109 | 72.587 | 259 | 1.25E-129 |      | Beta-ketoacyl synthase [Acidobacteria bacterium]                                               | PYQ67687     |
| KS_607 | 653  | CLR_cluster_068 | 79.07  | 215 | 3.73E-108 |      | Putative polyketide synthase [uncultured bacterium 2063G]                                      | ABB73286     |
| KS_608 | 599  | CLR_cluster_234 | 88.265 | 196 | 3.09E-109 | SupA | SupA [Theonella swinhoei bacterial symbiont clone pSW1H8]                                      | ABE03935     |
| KS_609 | 545  | CLR_cluster_163 | 84.831 | 178 | 1.29E-91  |      | Putative polyketide synthase [uncultured bacterium 2063G]                                      | ABB73286     |
| KS_611 | 449  | CLR_cluster_235 | 84.459 | 148 | 1.14E-77  | SwfA | Type I polyketide synthase [bacterium symbiont of Plakortis simplex pPS11G3]                   | AGH13577     |
| KS_613 | 362  | CLR_cluster_180 | 75.63  | 119 | 1.13E-53  | SupA | SupA [Theonella swinhoei bacterial symbiont clone pSW1H8]                                      | ABE03935     |
| KS_615 | 1262 | CLR_cluster_197 | 69.928 | 419 | 0         | SupA | SupA [Theonella swinhoei bacterial symbiont clone pSW1H8]                                      | ABE03935     |
| KS_616 | 341  | CLR_cluster_245 | 75.676 | 111 | 7.95E-51  | SupA | SupA [Theonella swinhoei bacterial symbiont clone pSW1H8]                                      | ABE03935     |
| KS_617 | 233  | CLR_cluster_250 | 77.333 | 75  | 4.24E-30  | SupA | SupA [Theonella swinhoei bacterial symbiont clone pSW1H8]                                      | ABE03935     |
| KS_618 | 233  | CLR_cluster_255 | 77.333 | 75  | 3.59E-30  | SupA | SupA [Theonella swinhoei bacterial symbiont clone pSW1H8]                                      | ABE03935     |

|        |      |                 |        |     |           |      |                                                                                     |           |
|--------|------|-----------------|--------|-----|-----------|------|-------------------------------------------------------------------------------------|-----------|
| KS_619 | 245  | CLR_cluster_268 | 77.5   | 80  | 2.20E-34  | SupA | SupA [Theonella swinhoei bacterial symbiont clone pSW1H8]                           | ABE03935  |
| KS_620 | 1259 | CLR_cluster_125 | 80.336 | 417 | 0         |      | Putative polyketide synthase [uncultured bacterium 2063G]                           | ABB73286  |
| KS_626 | 1265 | CLR_cluster_136 | 84.928 | 418 | 0         | SupA | SupA [Theonella swinhoei bacterial symbiont clone pSW1H8]                           | ABE03935  |
| KS_630 | 1259 | CLR_cluster_175 | 80.096 | 417 | 0         |      | Putative polyketide synthase [uncultured bacterium 2063G]                           | ABB73286  |
| KS_633 | 1265 | CLR_cluster_093 | 75.177 | 423 | 0         |      | SA1_PKSA [uncultured bacterial symbiont of Discodermia dissoluta]                   | AAAY00025 |
| KS_637 | 1262 | CLR_cluster_160 | 76.123 | 423 | 0         |      | SA1_PKSA [uncultured bacterial symbiont of Discodermia dissoluta]                   | AAAY00025 |
| KS_640 | 1259 | CLR_cluster_154 | 71.223 | 417 | 0         | SupA | SupA [Aplysina aerophoba bacterial symbiont clone pAPKS18]                          | ABE03915  |
| KS_644 | 1256 | CLR_cluster_026 | 75.352 | 426 | 0         |      | SA1_PKSA [uncultured bacterial symbiont of Discodermia dissoluta]                   | AAAY00025 |
| KS_645 | 1259 | CLR_cluster_161 | 81.818 | 418 | 0         | SupA | Polyketide synthase, partial [Aplysina aerophoba bacterial symbiont clone pAE27P20] | ABE03895  |
| KS_646 | 1256 | CLR_cluster_117 | 75.12  | 418 | 0         | SupA | SupA [Theonella swinhoei bacterial symbiont clone pSW1H8]                           | ABE03935  |
| KS_649 | 1259 | CLR_cluster_080 | 70.504 | 417 | 0         | SupA | SupA [Aplysina aerophoba bacterial symbiont clone pAPKS18]                          | ABE03915  |
| KS_654 | 1244 | CLR_cluster_058 | 66.118 | 425 | 2.01E-175 |      | SA1_PKSA [uncultured bacterial symbiont of Discodermia dissoluta]                   | AAAY00025 |
| KS_659 | 1259 | CLR_cluster_047 | 75.65  | 423 | 0         |      | SA1_PKSA [uncultured bacterial symbiont of Discodermia dissoluta]                   | AAAY00025 |
| KS_661 | 1265 | CLR_cluster_103 | 63.397 | 418 | 7.15E-173 | SupA | SupA [Theonella swinhoei bacterial symbiont clone pSW1H8]                           | ABE03935  |
| KS_669 | 1235 | CLR_cluster_208 | 71.359 | 412 | 0         | SupA | SupA [Theonella swinhoei bacterial symbiont clone pSW1H8]                           | ABE03935  |
| KS_671 | 1259 | CLR_cluster_048 | 68.106 | 417 | 0         | SupA | SupA [Aplysina aerophoba bacterial symbiont clone pAPKS18]                          | ABE03915  |
| KS_674 | 1268 | CLR_cluster_020 | 74.292 | 424 | 0         |      | SA1_PKSA [uncultured bacterial symbiont of Discodermia dissoluta]                   | AAAY00025 |
| KS_681 | 1277 | CLR_cluster_075 | 73.995 | 423 | 0         |      | SA1_PKSA [uncultured bacterial symbiont of Discodermia dissoluta]                   | AAAY00025 |
| KS_683 | 1268 | CLR_cluster_075 | 74.704 | 423 | 0         |      | SA1_PKSA [uncultured bacterial symbiont of Discodermia dissoluta]                   | AAAY00025 |
| KS_688 | 1259 | CLR_cluster_068 | 68.106 | 417 | 0         |      | SupA [Aplysina aerophoba bacterial symbiont clone pAPKS18]                          | ABE03915  |
| KS_695 | 1259 | CLR_cluster_056 | 80.096 | 417 | 0         |      | Putative polyketide synthase [uncultured bacterium 2063G]                           | ABB73286  |
| KS_701 | 1271 | CLR_cluster_173 | 74.232 | 423 | 0         |      | SA1_PKSA [uncultured bacterial symbiont of Discodermia dissoluta]                   | AAAY00025 |
| KS_705 | 1259 | CLR_cluster_206 | 72.249 | 418 | 0         | SupA | SupA [Theonella swinhoei bacterial symbiont clone pSW1H8]                           | ABE03935  |
| KS_708 | 1262 | CLR_cluster_242 | 82.297 | 418 | 0         | SupA | SupA [Theonella swinhoei bacterial symbiont clone pSW1H8]                           | ABE03935  |
| KS_720 | 1259 | CLR_cluster_155 | 70.743 | 417 | 0         | SupA | SupA [Aplysina aerophoba bacterial symbiont clone pAPKS18]                          | ABE03915  |
| KS_726 | 1259 | CLR_cluster_005 | 73.684 | 418 | 0         | SupA | SupA [Theonella swinhoei bacterial symbiont clone pSW1H8]                           | ABE03935  |
| KS_728 | 1259 | CLR_cluster_057 | 87.05  | 417 | 0         | SupA | SupA [Aplysina aerophoba bacterial symbiont clone pAPKS18]                          | ABE03915  |
| KS_730 | 1265 | CLR_cluster_040 | 68.9   | 418 | 0         | SupA | SupA [Theonella swinhoei bacterial symbiont clone pSW1H8]                           | ABE03935  |

|        |      |                 |        |     |           |      |                                                                                     |           |
|--------|------|-----------------|--------|-----|-----------|------|-------------------------------------------------------------------------------------|-----------|
| KS_732 | 1262 | CLR_cluster_034 | 74.224 | 419 | 0         | SupA | Polyketide synthase, partial [Aplysina aerophoba bacterial symbiont clone pAE27P20] | ABE03895  |
| KS_747 | 1109 | CLR_cluster_146 | 79.564 | 367 | 0         |      | SA1_PKSA [uncultured bacterial symbiont of Discodermia dissoluta]                   | AAAY00025 |
| KS_749 | 1319 | CLR_cluster_050 | 64.76  | 437 | 2.71E-174 | SupA | SupA [Aplysina aerophoba bacterial symbiont clone pAPKS18]                          | ABE03915  |
| KS_751 | 224  | CLR_cluster_130 | 70.833 | 72  | 6.11E-26  |      | Putative polyketide synthase [uncultured bacterium 2063G]                           | ABB73286  |
| KS_755 | 1262 | CLR_cluster_047 | 75.887 | 423 | 0         |      | SA1_PKSA [uncultured bacterial symbiont of Discodermia dissoluta]                   | AAAY00025 |
| KS_757 | 1250 | CLR_cluster_020 | 72.471 | 425 | 0         |      | SA1_PKSA [uncultured bacterial symbiont of Discodermia dissoluta]                   | AAAY00025 |
| KS_761 | 1277 | CLR_cluster_026 | 67.376 | 423 | 0         |      | SA1_PKSA [uncultured bacterial symbiont of Discodermia dissoluta]                   | AAAY00025 |

Table S9. BLAST search of the KS sequences from the metagenome of *R. globostellata* against the nr database in NCBI

| KS ID  | Length (nt) | BGC ID          | Identity (%) | Alignment length (aa) | E-value   | Sponge-specific cluster | The homologous sequences                                                                                  | Accession number |
|--------|-------------|-----------------|--------------|-----------------------|-----------|-------------------------|-----------------------------------------------------------------------------------------------------------|------------------|
| KS_001 | 696         | RHG_cluster_258 | 89.52        | 229                   | 1.64E-130 | SupA                    | SupA [Aplysina aerophoba bacterial symbiont clone pAPKS18]                                                | ABE03915         |
| KS_004 | 1185        | RHG_cluster_332 | 68.608       | 395                   | 0         |                         | Beta-ketoacyl-[acyl-carrier-protein] synthase II [Chloroflexi bacterium]                                  | RLT43681         |
| KS_006 | 1128        | RHG_cluster_316 | 65.193       | 362                   | 1.66E-155 | SupA                    | SupA [Theonella swinhoei bacterial symbiont clone pSW1H8]                                                 | ABE03935         |
| KS_007 | 1059        | RHG_cluster_341 | 73.547       | 344                   | 5.51E-163 | SwfA                    | Type I polyketide synthase [bacterium symbiont of Plakortis simplex pPSA11D7]                             | AGH13590         |
| KS_010 | 1176        | RHG_cluster_342 | 71.85        | 373                   | 7.92E-175 | SupA                    | SupA [Theonella swinhoei bacterial symbiont clone pSW1H8]                                                 | ABE03935         |
| KS_011 | 801         | RHG_cluster_340 | 56.667       | 270                   | 3.28E-94  |                         | Type I polyketide synthase, partial [Lentisphaerales bacterium]                                           | TFH18080         |
| KS_012 | 429         | RHG_cluster_282 | 66.667       | 138                   | 5.19E-57  | SupA                    | SupA [Theonella swinhoei bacterial symbiont clone pSW1H8]                                                 | ABE03935         |
| KS_014 | 1086        | RHG_cluster_275 | 63.435       | 361                   | 1.84E-170 |                         | Beta-ketoacyl-[acyl-carrier-protein] synthase II [Chloroflexi bacterium TMED230]                          | OUW96072         |
| KS_016 | 1239        | RHG_cluster_191 | 67.073       | 410                   | 8.81E-169 |                         | SA1_PKSA [uncultured bacterial symbiont of Discodermia dissoluta]                                         | AAAY00025        |
| KS_019 | 1017        | RHG_cluster_352 | 77.811       | 338                   | 0         |                         | Beta-ketoacyl-[acyl-carrier-protein] synthase I [Gammaproteobacteria bacterium RIFCSPLOWO2_02_FULL_61_13] | OGT79717         |
| KS_020 | 705         | RHG_cluster_308 | 74.236       | 229                   | 2.69E-113 | SupA                    | SupA [Theonella swinhoei bacterial symbiont clone pSW1H8]                                                 | ABE03935         |
| KS_021 | 771         | RHG_cluster_354 | 71.146       | 253                   | 1.08E-110 | SwfA                    | Type I polyketide synthase [bacterium symbiont of Plakortis simplex pPS11G3]                              | AGH13577         |
| KS_026 | 1080        | RHG_cluster_321 | 68.156       | 358                   | 0         |                         | Beta-ketoacyl-[acyl-carrier-protein] synthase II [Deltaproteobacteria bacterium RIFOXYA2_FULL_55_11]      | OGQ91897         |
| KS_028 | 591         | RHG_cluster_221 | 75.258       | 194                   | 7.05E-89  | SupA                    | SupA [Aplysina aerophoba bacterial symbiont clone pAPKS18]                                                | ABE03915         |
| KS_033 | 1266        | RHG_cluster_087 | 80.523       | 421                   | 0         | SupA                    | SupA [uncultured marine bacterium 1k6]                                                                    | ACX49735         |
| KS_036 | 792         | RHG_cluster_345 | 72.481       | 258                   | 8.15E-122 | SupA                    | SupA [Theonella swinhoei bacterial symbiont clone pSW1H8]                                                 | ABE03935         |
| KS_037 | 390         | RHG_cluster_351 | 85.039       | 127                   | 5.54E-64  | SupA                    | SupA [Aplysina aerophoba bacterial symbiont clone pAPKS18]                                                | ABE03915         |
| KS_040 | 1038        | RHG_cluster_295 | 88.663       | 344                   | 0         |                         | Putative polyketide synthase [uncultured bacterium 2063G]                                                 | ABB73286         |
| KS_043 | 540         | RHG_cluster_283 | 84.831       | 178                   | 2.92E-89  | SwfA                    | Type I polyketide synthase [bacterium symbiont of Plakortis simplex pPSA11D7]                             | AGH13590         |
| KS_045 | 741         | RHG_cluster_338 | 81.743       | 241                   | 1.20E-124 | SupA                    | SupA [Theonella swinhoei bacterial symbiont clone pSW1H8]                                                 | ABE03935         |
| KS_046 | 354         | RHG_cluster_362 | 81.739       | 115                   | 1.59E-56  | SwfA                    | Type I polyketide synthase [bacterium symbiont of Plakortis simplex pPS11G3]                              | AGH13577         |
| KS_048 | 1266        | RHG_cluster_136 | 74.048       | 420                   | 0         | SwfA                    | Type I polyketide synthase [bacterium symbiont of Plakortis simplex pPSA11D7]                             | AGH13590         |
| KS_052 | 285         | RHG_cluster_367 | 64.835       | 91                    | 1.60E-34  |                         | SA1_PKSB [uncultured bacterial symbiont of Discodermia dissoluta]                                         | AAAY00026        |

|        |      |                 |        |     |           |      |                                                                                               |              |
|--------|------|-----------------|--------|-----|-----------|------|-----------------------------------------------------------------------------------------------|--------------|
| KS_053 | 543  | RHG_cluster_357 | 86.441 | 177 | 2.91E-95  | SupA | SupA [Aplysina aerophoba bacterial symbiont clone pAPKS18]                                    | ABE03915     |
| KS_054 | 525  | RHG_cluster_356 | 88.953 | 172 | 8.75E-96  | SupA | SupA [Aplysina aerophoba bacterial symbiont clone pAPKS18]                                    | ABE03915     |
| KS_056 | 1008 | RHG_cluster_355 | 75.821 | 335 | 0         |      | Beta-ketoacyl-[acyl-carrier-protein] synthase II, partial [Bacteroidetes bacterium]           | RMF59781     |
| KS_060 | 444  | RHG_cluster_183 | 80.137 | 146 | 8.94E-72  | SwfA | Type I polyketide synthase [bacterium symbiont of Plakortis simplex pPS11G3]                  | AGH13577     |
| KS_062 | 657  | RHG_cluster_318 | 74.074 | 216 | 4.61E-101 | SupA | SupA [Theonella swinhoei bacterial symbiont clone pSW1H8]                                     | ABE03935     |
| KS_063 | 1230 | RHG_cluster_019 | 72.422 | 417 | 0         |      | SA1_PKSA [uncultured bacterial symbiont of Discodermia dissoluta]                             | AAAY00025    |
| KS_065 | 591  | RHG_cluster_255 | 75.258 | 194 | 3.22E-88  | SupA | SupA [Aplysina aerophoba bacterial symbiont clone pAPKS18]                                    | ABE03915     |
| KS_067 | 1272 | RHG_cluster_124 | 82.185 | 421 | 0         | SupA | SupA [Aplysina aerophoba bacterial symbiont clone pAPKS18]                                    | ABE03915     |
| KS_069 | 825  | RHG_cluster_168 | 74.632 | 272 | 3.07E-131 | SupA | SupA [Theonella swinhoei bacterial symbiont clone pSW1H8]                                     | ABE03935     |
| KS_071 | 1152 | RHG_cluster_294 | 72.299 | 361 | 7.87E-172 | SupA | SupA [Theonella swinhoei bacterial symbiont clone pSW1H8]                                     | ABE03935     |
| KS_074 | 1187 | RHG_cluster_151 | 66.667 | 396 | 0         |      | Beta-ketoacyl-ACP synthase II [Bryobacter aggregatus]                                         | WP_031496688 |
| KS_075 | 1136 | RHG_cluster_164 | 87.464 | 351 | 0         | SupA | SupA [Aplysina aerophoba bacterial symbiont clone pAPKS18]                                    | ABE03915     |
| KS_077 | 1097 | RHG_cluster_310 | 73.889 | 360 | 0         |      | 3-Oxoacyl-[acyl-carrier-protein] synthase2C KASII [gamma proteobacterium IMCC2047]            | EGG99443     |
| KS_080 | 1094 | RHG_cluster_343 | 66.575 | 365 | 2.31E-170 |      | 3-Oxoacyl-[acyl-carrier-protein] synthase II [Chloroflexi bacterium]                          | PZC47099     |
| KS_083 | 1130 | RHG_cluster_336 | 66.216 | 370 | 3.15E-156 | SupA | SupA [Theonella swinhoei bacterial symbiont clone pSW1H8]                                     | ABE03935     |
| KS_088 | 893  | RHG_cluster_279 | 82.414 | 290 | 1.78E-155 | SupA | SupA [Theonella swinhoei bacterial symbiont clone pSW1H8]                                     | ABE03935     |
| KS_091 | 977  | RHG_cluster_119 | 78.505 | 321 | 2.18E-159 |      | SA1_PKSA [uncultured bacterial symbiont of Discodermia dissoluta]                             | AAAY00025    |
| KS_094 | 1097 | RHG_cluster_111 | 49.57  | 349 | 2.55E-96  |      | Putative Beta-ketoacyl synthase [Sorangium cellulosum So ce56]                                | CAN93510     |
| KS_096 | 1097 | RHG_cluster_116 | 51.734 | 346 | 1.27E-98  |      | Putative Beta-ketoacyl synthase [Sorangium cellulosum So ce56]                                | CAN93510     |
| KS_098 | 1100 | RHG_cluster_184 | 52.61  | 249 | 6.33E-79  |      | Putative Beta-ketoacyl synthase [Sorangium cellulosum So ce56]                                | CAN93510     |
| KS_103 | 1007 | RHG_cluster_365 | 71.56  | 327 | 2.23E-154 |      | Beta-ketoacyl-[acyl-carrier-protein] synthase II [Chloroflexi bacterium]                      | RLT35298     |
| KS_104 | 1223 | RHG_cluster_007 | 82.02  | 406 | 0         |      | Beta-ketoacyl-ACP synthase II [Thioalkalivibrio sp. HK1]                                      | WP_038098656 |
| KS_107 | 1223 | RHG_cluster_018 | 93.857 | 407 | 0         |      | Beta-ketoacyl-[acyl-carrier-protein] synthase II [Candidatus Poribacteria bacterium]          | RKU31990     |
| KS_108 | 1217 | RHG_cluster_278 | 95.05  | 404 | 0         |      | Beta-ketoacyl-ACP synthase I [Rhodospirillaceae bacterium Spongia-Bin9]                       | WP_108794197 |
| KS_109 | 1208 | RHG_cluster_153 | 78.164 | 403 | 0         |      | 3-Oxoacyl-[acyl-carrier-protein] synthase I [Alphaproteobacteria bacterium MarineAlpha3 Bin7] | PPR64109     |
| KS_110 | 1202 | RHG_cluster_073 | 73.116 | 398 | 0         |      | 3-Oxoacyl-ACP synthase [OM182 bacterium BACL3 MAG-120507-bin80]                               | KRO71573     |
| KS_112 | 1250 | RHG_cluster_127 | 79.177 | 413 | 0         |      | Beta-ketoacyl-ACP synthase II [Rhodospirillaceae bacterium SYSU D60014]                       | WP_119459592 |



|        |      |                 |        |     |           |      |                                                                                                           |              |
|--------|------|-----------------|--------|-----|-----------|------|-----------------------------------------------------------------------------------------------------------|--------------|
| KS_113 | 1259 | RHG_cluster_237 | 61.244 | 418 | 5.64E-164 | SupA | SupA [Theonella swinhoei bacterial symbiont clone pSW1H8]                                                 | ABE03935     |
| KS_130 | 1091 | RHG_cluster_315 | 70.055 | 364 | 0         |      | Beta-ketoacyl-[acyl-carrier-protein] synthase II [Gammaproteobacteria bacterium]                          | TDJ41741     |
| KS_131 | 1226 | RHG_cluster_098 | 58.333 | 408 | 5.12E-174 |      | Beta-ketoacyl-[acyl-carrier-protein] synthase II [SAR202 cluster bacterium Casp-Chloro-G4]                | PKB61328     |
| KS_135 | 1199 | RHG_cluster_033 | 67.758 | 397 | 0         |      | Beta-ketoacyl-[acyl-carrier-protein] synthase family protein [Rhodovulum sp. MB263]                       | WP_080616320 |
| KS_137 | 1184 | RHG_cluster_156 | 77.215 | 395 | 0         |      | Beta-ketoacyl-ACP synthase I [Albidovulum inexpectatum]                                                   | WP_104068930 |
| KS_140 | 1250 | RHG_cluster_277 | 73.366 | 413 | 0         |      | Beta-ketoacyl-ACP synthase II [Rhodospirillales bacterium URHD0088]                                       | WP_027300572 |
| KS_143 | 1223 | RHG_cluster_049 | 75.862 | 406 | 0         |      | Beta-ketoacyl-[acyl-carrier-protein] synthase II [Gammaproteobacteria bacterium]                          | TDJ17613     |
| KS_144 | 1223 | RHG_cluster_138 | 93.366 | 407 | 0         |      | Beta-ketoacyl-[acyl-carrier-protein] synthase II [Candidatus Poribacteria bacterium]                      | RKU30153     |
| KS_148 | 1214 | RHG_cluster_231 | 67.782 | 239 | 1.81E-117 |      | Beta-ketoacyl-ACP synthase [Aeromonas sp. HMWF016]                                                        | WP_108570661 |
| KS_151 | 1196 | RHG_cluster_250 | 70.603 | 398 | 0         |      | Beta-ketoacyl-[acyl-carrier-protein] synthase I [OM182 bacterium MED-G28]                                 | PDH34065     |
| KS_153 | 1250 | RHG_cluster_079 | 72.488 | 418 | 0         |      | Hypothetical protein A3I72_04005 [Candidatus Tectomicrobia bacterium RIFCSPLOWO2_02_FULL_70_19]           | OGL60879     |
| KS_161 | 1073 | RHG_cluster_292 | 77.933 | 358 | 0         |      | Beta-ketoacyl-ACP synthase I [Gammaproteobacteria bacterium]                                              | RLA45169     |
| KS_162 | 1202 | RHG_cluster_108 | 73.684 | 399 | 0         |      | Beta-ketoacyl-[acyl-carrier-protein] synthase I [Gammaproteobacteria bacterium RIFCSPLOWO2_02_FULL_61_13] | OGT79717     |
| KS_166 | 1223 | RHG_cluster_023 | 82.555 | 407 | 0         |      | Beta-ketoacyl-[acyl-carrier-protein] synthase II [bacterium]                                              | RZP29941     |
| KS_167 | 1151 | RHG_cluster_271 | 73.958 | 384 | 0         |      | Beta-ketoacyl-[acyl-carrier-protein] synthase II [Acidobacteria bacterium]                                | TDI09580     |
| KS_173 | 1253 | RHG_cluster_326 | 71.053 | 418 | 0         | SupA | SupA [Theonella swinhoei bacterial symbiont clone pSW1H8]                                                 | ABE03935     |
| KS_174 | 1229 | RHG_cluster_130 | 68.447 | 412 | 0         |      | Beta-ketoacyl-[acyl-carrier-protein] synthase II [Gemmatimonadetes bacterium]                             | RMH15744     |
| KS_175 | 1217 | RHG_cluster_114 | 69.136 | 405 | 0         |      | 3-Oxoacyl-[acyl-carrier-protein] synthase 2 [bacterium HR37]                                              | GBD38054     |
| KS_176 | 1265 | RHG_cluster_335 | 72.01  | 418 | 0         | SupA | SupA [Theonella swinhoei bacterial symbiont clone pSW1H8]                                                 | ABE03935     |
| KS_178 | 1187 | RHG_cluster_217 | 79.348 | 368 | 0         | SupA | SupA [Theonella swinhoei bacterial symbiont clone pSW1H8]                                                 | ABE03935     |
| KS_181 | 1223 | RHG_cluster_188 | 64.532 | 406 | 0         |      | Beta-ketoacyl-ACP synthase II [Moorella humiferrea]                                                       | WP_106006374 |
| KS_182 | 1223 | RHG_cluster_225 | 74.265 | 408 | 0         |      | Beta-ketoacyl-[acyl-carrier-protein] synthase II [Chloroflexi bacterium]                                  | TDI92680     |
| KS_186 | 1280 | RHG_cluster_078 | 64.858 | 424 | 4.20E-174 |      | Hypothetical protein A3I72_03985 [Candidatus Tectomicrobia bacterium RIFCSPLOWO2_02_FULL_70_19]           | OGL60875     |
| KS_188 | 1217 | RHG_cluster_009 | 70.968 | 403 | 0         |      | Beta-ketoacyl-[acyl-carrier-protein] synthase II [Gammaproteobacteria bacterium]                          | TDJ36329     |
| KS_189 | 1196 | RHG_cluster_334 | 67.669 | 399 | 0         |      | Beta-ketoacyl-[acyl-carrier-protein] synthase II [Gammaproteobacteria bacterium]                          | TDJ29040     |

|        |      |                 |        |     |           |      |                                                                                                                      |              |
|--------|------|-----------------|--------|-----|-----------|------|----------------------------------------------------------------------------------------------------------------------|--------------|
| KS_191 | 1226 | RHG_cluster_142 | 62.162 | 407 | 0         |      | Beta-ketoacyl-[acyl-carrier-protein] synthase II [Proteobacteria bacterium]                                          | PZN30994     |
| KS_193 | 1091 | RHG_cluster_359 | 69.78  | 364 | 0         |      | Beta-ketoacyl-[acyl-carrier-protein] synthase II [Candidatus Muproteobacteria bacterium RBG_19FT_COMBO_61_10]        | OGI58435     |
| KS_195 | 1163 | RHG_cluster_122 | 68.325 | 382 | 0         |      | Beta-ketoacyl-[acyl-carrier-protein] synthase II [Gammaproteobacteria bacterium]                                     | TDJ41741     |
| KS_197 | 1226 | RHG_cluster_305 | 61.52  | 408 | 1.50E-179 |      | Beta-ketoacyl synthase [Nitrosomonas europaea]                                                                       | KXK43820     |
| KS_202 | 1223 | RHG_cluster_344 | 66.23  | 382 | 0         |      | Beta-ketoacyl-[acyl-carrier-protein] synthase II [Candidatus Muproteobacteria bacterium RBG_19FT_COMBO_61_10]        | OGI58435     |
| KS_203 | 1217 | RHG_cluster_235 | 69.704 | 406 | 0         |      | Beta-ketoacyl-[acyl-carrier-protein] synthase II [Gammaproteobacteria bacterium RBG_16_51_14]                        | OGT30519     |
| KS_205 | 1064 | RHG_cluster_120 | 70.566 | 265 | 1.35E-131 |      | 3-Oxoacyl-ACP synthase [Ralstonia pickettii DTP0602]                                                                 | AGW95093     |
| KS_218 | 1136 | RHG_cluster_080 | 44.764 | 382 | 6.50E-63  |      | Hypothetical protein A3J27_09500 [Candidatus Tectomicrobia bacterium RIFCSPLOWO2_12_FULL_69_37]                      | OGL68338     |
| KS_220 | 1223 | RHG_cluster_274 | 73.037 | 382 | 0         |      | Beta-ketoacyl-[acyl-carrier-protein] synthase II [SAR86 cluster bacterium]                                           | PCJ26052     |
| KS_223 | 1223 | RHG_cluster_012 | 71.253 | 407 | 0         |      | MULTISPECIES: Beta-ketoacyl-ACP synthase II [Ectothiorhodospira]                                                     | WP_025281708 |
| KS_224 | 1259 | RHG_cluster_296 | 79.426 | 418 | 0         | SupA | SupA [Theonella swinhoei bacterial symbiont clone pSW1H8]                                                            | ABE03935     |
| KS_225 | 1223 | RHG_cluster_319 | 68.395 | 405 | 0         |      | Beta-ketoacyl-[acyl-carrier-protein] synthase II [Acidobacteria bacterium]                                           | RPH64142     |
| KS_235 | 1217 | RHG_cluster_324 | 66.584 | 404 | 0         |      | Beta-ketoacyl-[acyl-carrier-protein] synthase II [Thermodesulfobacteriales bacterium]                                | TFG75955     |
| KS_236 | 1223 | RHG_cluster_347 | 71.429 | 406 | 0         |      | Beta-ketoacyl-[acyl-carrier-protein] synthase II [OM182 bacterium MED-G28]                                           | PDH35184     |
| KS_237 | 1223 | RHG_cluster_281 | 76.961 | 408 | 0         |      | Beta-ketoacyl-[acyl-carrier-protein] synthase II [Acidobacteria bacterium RIFCSPLOWO2_02_FULL_67_36]                 | OFW09771     |
| KS_240 | 1157 | RHG_cluster_051 | 62.565 | 382 | 8.48E-158 |      | Beta-ketoacyl synthase [Actinobacteria bacterium]                                                                    | RUA23523     |
| KS_244 | 1220 | RHG_cluster_263 | 70.443 | 406 | 0         |      | Beta-ketoacyl-[acyl-carrier-protein] synthase II [Gammaproteobacteria bacterium RBG_16_51_14]                        | OGT30519     |
| KS_249 | 1226 | RHG_cluster_220 | 62.162 | 407 | 0         |      | Beta-ketoacyl-[acyl-carrier-protein] synthase II [Proteobacteria bacterium]                                          | PZN30994     |
| KS_252 | 1292 | RHG_cluster_011 | 78.788 | 429 | 0         | SwfA | Type I polyketide synthase [bacterium symbiont of Plakortis simplex pPSA11D7]                                        | AGH13590     |
| KS_254 | 1226 | RHG_cluster_301 | 62.347 | 409 | 0         |      | Beta-ketoacyl-[acyl-carrier-protein] synthase II [Candidatus Handelsmanbacteria bacterium RIFCSPLOWO2_12_FULL_64_10] | OGG49603     |
| KS_256 | 1229 | RHG_cluster_039 | 65.366 | 410 | 0         |      | Beta-ketoacyl-[acyl-carrier-protein] synthase II [Gemmatimonadetes bacterium]                                        | RMH15744     |
| KS_259 | 1220 | RHG_cluster_148 | 64.02  | 403 | 1.48E-166 |      | Beta-ketoacyl-[acyl-carrier-protein] synthase family protein [Acidobacteria bacterium]                               | REJ81214     |
| KS_261 | 1223 | RHG_cluster_035 | 73.399 | 406 | 0         |      | Beta-ketoacyl-[acyl-carrier-protein] synthase II [Gammaproteobacteria bacterium TMED119]                             | OUV63604     |

|        |      |                 |        |     |           |      |                                                                                                                      |              |
|--------|------|-----------------|--------|-----|-----------|------|----------------------------------------------------------------------------------------------------------------------|--------------|
| KS_264 | 1214 | RHG_cluster_227 | 69.059 | 404 | 0         |      | Beta-ketoacyl-[acyl-carrier-protein] synthase II [Acidobacteria bacterium]                                           | RMH20421     |
| KS_267 | 1292 | RHG_cluster_028 | 78.322 | 429 | 0         | SwfA | Type I polyketide synthase [bacterium symbiont of Plakortis simplex pPSA11D7]                                        | AGH13590     |
| KS_269 | 1151 | RHG_cluster_212 | 78.272 | 382 | 0         |      | Beta-ketoacyl synthase [Acidimicrobiales bacterium MED-G01]                                                          | PDH69975     |
| KS_270 | 1229 | RHG_cluster_185 | 62.347 | 409 | 0         |      | Beta-ketoacyl-ACP synthase II [Nitrosomonas aestuarii]                                                               | WP_090702733 |
| KS_278 | 1226 | RHG_cluster_020 | 71.144 | 402 | 0         |      | Beta-ketoacyl-[acyl-carrier-protein] synthase II [Candidatus Handelsmanbacteria bacterium RIFCSPLOWO2_12_FULL_64_10] | OGG49603     |
| KS_285 | 1280 | RHG_cluster_081 | 72.104 | 423 | 0         |      | Hypothetical protein A3I72_04025 [Candidatus Tectomicrobia bacterium RIFCSPLOWO2_02_FULL_70_19]                      | OGL60883     |
| KS_290 | 1292 | RHG_cluster_091 | 83.411 | 428 | 0         | SwfA | Type I polyketide synthase [bacterium symbiont of Plakortis simplex pPSA11D7]                                        | AGH13590     |
| KS_292 | 1292 | RHG_cluster_096 | 69.07  | 430 | 0         | SwfA | Type I polyketide synthase [bacterium symbiont of Plakortis simplex pPSA11D7]                                        | AGH13590     |
| KS_295 | 1286 | RHG_cluster_094 | 64.371 | 421 | 0         |      | SDR family NAD(P)-dependent oxidoreductase [Cocleimonas flava]                                                       | WP_131906443 |
| KS_296 | 1229 | RHG_cluster_244 | 63.882 | 407 | 0         |      | Beta-ketoacyl-[acyl-carrier-protein] synthase II [Actinobacteria bacterium RBG_16_68_21]                             | OFW66625     |
| KS_298 | 1259 | RHG_cluster_253 | 71.599 | 419 | 0         |      | Beta-ketoacyl-[acyl-carrier-protein] synthase family protein [Acidobacteria bacterium]                               | TDI25416     |
| KS_299 | 1160 | RHG_cluster_273 | 70.893 | 347 | 1.48E-168 |      | Beta-ketoacyl synthase [Actinobacteria bacterium]                                                                    | RUA23523     |
| KS_300 | 1226 | RHG_cluster_075 | 71.499 | 407 | 0         |      | Beta-ketoacyl-[acyl-carrier-protein] synthase II [bacterium]                                                         | TAK06915     |
| KS_304 | 1154 | RHG_cluster_045 | 53.786 | 383 | 3.88E-131 |      | Hypothetical protein [Pelagimonas phthalica]                                                                         | WP_099241578 |
| KS_313 | 1226 | RHG_cluster_178 | 72.482 | 407 | 0         |      | Beta-ketoacyl-[acyl-carrier-protein] synthase II [bacterium]                                                         | TAK06915     |
| KS_316 | 1217 | RHG_cluster_264 | 66.832 | 404 | 0         |      | Beta-ketoacyl-[acyl-carrier-protein] synthase II [Chloroflexi bacterium]                                             | RME76096     |
| KS_318 | 1214 | RHG_cluster_030 | 67.822 | 404 | 0         |      | Beta-ketoacyl-[acyl-carrier-protein] synthase II [Chloroflexi bacterium]                                             | RME76096     |
| KS_319 | 1160 | RHG_cluster_259 | 70.317 | 347 | 3.44E-166 |      | Beta-ketoacyl synthase [Actinobacteria bacterium]                                                                    | RUA23523     |
| KS_320 | 1286 | RHG_cluster_215 | 80.328 | 427 | 0         |      | Putative polyketide synthase [uncultured bacterium 2063G]                                                            | ABB73286     |
| KS_324 | 1223 | RHG_cluster_313 | 66.585 | 407 | 0         |      | Beta-ketoacyl-[acyl-carrier-protein] synthase II [Chloroflexi bacterium]                                             | TDI92680     |
| KS_328 | 1154 | RHG_cluster_133 | 51.558 | 353 | 8.38E-110 |      | Hypothetical protein [Pelagimonas phthalica]                                                                         | WP_099241578 |
| KS_331 | 1160 | RHG_cluster_085 | 69.713 | 383 | 0         |      | Beta-ketoacyl synthase [Actinobacteria bacterium]                                                                    | RUA23523     |
| KS_333 | 1286 | RHG_cluster_165 | 80.328 | 427 | 0         |      | Putative polyketide synthase [uncultured bacterium 2063G]                                                            | ABB73286     |
| KS_335 | 1298 | RHG_cluster_302 | 78.089 | 429 | 0         | SwfA | Type I polyketide synthase [bacterium symbiont of Plakortis simplex pPSA11D7]                                        | AGH13590     |
| KS_343 | 1229 | RHG_cluster_222 | 67.64  | 411 | 0         |      | Beta-ketoacyl-[acyl-carrier-protein] synthase II [Gemmatimonadetes bacterium]                                        | RMH15744     |

|        |      |                 |        |     |           |      |                                                                                                                      |              |
|--------|------|-----------------|--------|-----|-----------|------|----------------------------------------------------------------------------------------------------------------------|--------------|
| KS_344 | 1292 | RHG_cluster_016 | 75.991 | 429 | 0         | SwfA | Type I polyketide synthase [bacterium symbiont of Plakortis simplex pPSA11D7]                                        | AGH13590     |
| KS_347 | 1292 | RHG_cluster_034 | 61.593 | 427 | 1.30E-174 | SwfA | Type I polyketide synthase [bacterium symbiont of Plakortis simplex pPSA11D7]                                        | AGH13590     |
| KS_348 | 1226 | RHG_cluster_348 | 70.098 | 408 | 0         |      | Beta-ketoacyl-[acyl-carrier-protein] synthase II [Chloroflexi bacterium]                                             | RLT28345     |
| KS_352 | 1229 | RHG_cluster_004 | 67.64  | 411 | 0         |      | Beta-ketoacyl-[acyl-carrier-protein] synthase II [Gemmatimonadetes bacterium]                                        | RMH15744     |
| KS_355 | 1154 | RHG_cluster_236 | 59.791 | 383 | 1.03E-161 |      | Beta-ketoacyl synthase [Acidimicrobiaceae bacterium TMED77]                                                          | OUV00831     |
| KS_359 | 1292 | RHG_cluster_206 | 75.878 | 427 | 0         | SwfA | Type I polyketide synthase [bacterium symbiont of Plakortis simplex pPSA11D7]                                        | AGH13590     |
| KS_365 | 1220 | RHG_cluster_031 | 76.485 | 404 | 0         |      | Beta-ketoacyl-[acyl-carrier-protein] synthase II [Nitrospirae bacterium]                                             | TAJ27615     |
| KS_367 | 1229 | RHG_cluster_084 | 67.397 | 411 | 0         |      | Beta-ketoacyl-[acyl-carrier-protein] synthase II [Gemmatimonadetes bacterium]                                        | RMH15744     |
| KS_374 | 1184 | RHG_cluster_360 | 60.66  | 394 | 8.82E-179 |      | Beta-ketoacyl-[acyl-carrier-protein] synthase II [Chloroflexi bacterium TMED70]                                      | OOU77203     |
| KS_377 | 1229 | RHG_cluster_150 | 61.52  | 408 | 0         |      | Beta-ketoacyl-[acyl-carrier-protein] synthase II [Chloroflexi bacterium TMED230]                                     | OOW96072     |
| KS_380 | 1292 | RHG_cluster_135 | 77.622 | 429 | 0         | SwfA | Type I polyketide synthase [bacterium symbiont of Plakortis simplex pPSA11D7]                                        | AGH13590     |
| KS_387 | 1292 | RHG_cluster_067 | 75.058 | 429 | 0         | SwfA | Type I polyketide synthase [bacterium symbiont of Plakortis simplex pPSA11D7]                                        | AGH13590     |
| KS_388 | 1229 | RHG_cluster_317 | 68.049 | 410 | 0         |      | Beta-ketoacyl-[acyl-carrier-protein] synthase II [Gemmatimonadetes bacterium]                                        | RMH15744     |
| KS_390 | 1223 | RHG_cluster_172 | 64.532 | 406 | 0         |      | Beta-ketoacyl-[acyl-carrier-protein] synthase II [Candidatus Handelsmanbacteria bacterium RIFCSPLOWO2 12 FULL 64 10] | OGG49603     |
| KS_392 | 1247 | RHG_cluster_097 | 71.981 | 414 | 0         |      | Beta-ketoacyl-ACP synthase II [Rhodospirillaceae bacterium SYSU D60014]                                              | WP_119459592 |
| KS_396 | 1292 | RHG_cluster_269 | 72.028 | 429 | 0         | SwfA | Type I polyketide synthase [bacterium symbiont of Plakortis simplex pPSA11D7]                                        | AGH13590     |
| KS_397 | 1292 | RHG_cluster_202 | 88.095 | 420 | 0         | SwfA | Type I polyketide synthase [bacterium symbiont of Plakortis simplex pPS11G3]                                         | AGH13577     |
| KS_398 | 1286 | RHG_cluster_167 | 81.733 | 427 | 0         |      | Putative polyketide synthase [uncultured bacterium 2063G]                                                            | ABB73286     |
| KS_400 | 1184 | RHG_cluster_132 | 62.5   | 392 | 8.30E-169 |      | Beta-ketoacyl-[acyl-carrier-protein] synthase family protein [Pelagimonas phthalica]                                 | WP_099241574 |
| KS_406 | 1184 | RHG_cluster_044 | 63.265 | 392 | 9.60E-171 |      | Beta-ketoacyl-[acyl-carrier-protein] synthase family protein [Pelagimonas phthalica]                                 | WP_099241574 |
| KS_408 | 1292 | RHG_cluster_128 | 91.905 | 420 | 0         | SwfA | Type I polyketide synthase [bacterium symbiont of Plakortis simplex pPS11G3]                                         | AGH13577     |
| KS_410 | 1286 | RHG_cluster_037 | 91.569 | 427 | 0         |      | Putative polyketide synthase [uncultured bacterium 2063G]                                                            | ABB73286     |
| KS_411 | 1223 | RHG_cluster_214 | 58.333 | 408 | 4.30E-179 |      | Beta-ketoacyl-[acyl-carrier-protein] synthase II [Chloroflexi bacterium RBG 16 64 32]                                | OGO48822     |

|        |      |                 |        |     |           |      |                                                                                     |              |
|--------|------|-----------------|--------|-----|-----------|------|-------------------------------------------------------------------------------------|--------------|
| KS_429 | 1292 | RHG_cluster_040 | 66.667 | 426 | 0         | SupA | Polyketide synthase, partial [Aplysina aerophoba bacterial symbiont clone pAE27P20] | ABE03895     |
| KS_430 | 1292 | RHG_cluster_109 | 76.69  | 429 | 0         | SwfA | Type I polyketide synthase [bacterium symbiont of Plakortis simplex pPSA11D7]       | AGH13590     |
| KS_437 | 1235 | RHG_cluster_077 | 68.856 | 411 | 0         |      | Beta-ketoacyl-[acyl-carrier-protein] synthase II [Gemmatimonadetes bacterium]       | RMH15744     |
| KS_439 | 1211 | RHG_cluster_086 | 76.19  | 399 | 0         |      | Beta-ketoacyl-ACP synthase II [Rhodospirillaceae bacterium SYSU D60014]             | WP_119459592 |
| KS_446 | 1289 | RHG_cluster_069 | 86.651 | 427 | 0         | SupA | SupA [Theonella swinhoei bacterial symbiont clone pSW1H8]                           | ABE03935     |
| KS_448 | 1292 | RHG_cluster_209 | 88.095 | 420 | 0         | SwfA | Type I polyketide synthase [bacterium symbiont of Plakortis simplex pPS11G3]        | AGH13577     |
| KS_449 | 1160 | RHG_cluster_241 | 69.171 | 386 | 0         |      | Beta-ketoacyl-ACP synthase I [Gammaproteobacteria bacterium]                        | RLA03002     |
| KS_452 | 1286 | RHG_cluster_249 | 75.878 | 427 | 0         | SupA | SupA [Theonella swinhoei bacterial symbiont clone pSW1H8]                           | ABE03935     |
| KS_453 | 1286 | RHG_cluster_174 | 67.529 | 425 | 0         | SupA | SupA [Aplysina aerophoba bacterial symbiont clone pAPKS18]                          | ABE03915     |
| KS_459 | 1184 | RHG_cluster_218 | 72.237 | 389 | 0         |      | 3-Oxoacyl-ACP synthase [Candidatus Tenderia electrophaga]                           | ALP54806     |
| KS_460 | 1145 | RHG_cluster_074 | 56.614 | 378 | 1.02E-132 |      | Beta-ketoacyl-[acyl-carrier-protein] synthase family protein [Lysobacter sp.]       | TBR14181     |
| KS_462 | 1190 | RHG_cluster_143 | 69.424 | 399 | 0         |      | Beta-ketoacyl-ACP synthase II [Pararhodobacter aggregans]                           | WP_107749575 |
| KS_468 | 1175 | RHG_cluster_068 | 81.538 | 390 | 0         |      | Beta-ketoacyl-ACP synthase II [Thioalkalivibrio sp. HK1]                            | WP_038098656 |
| KS_469 | 1286 | RHG_cluster_100 | 83.138 | 427 | 0         |      | Putative polyketide synthase [uncultured bacterium 2063G]                           | ABB73286     |
| KS_471 | 1175 | RHG_cluster_144 | 80     | 390 | 0         |      | Beta-ketoacyl-ACP synthase II [Thioalkalivibrio sp. HK1]                            | WP_038098656 |
| KS_474 | 1211 | RHG_cluster_216 | 73.869 | 398 | 0         |      | Beta-ketoacyl-ACP synthase II [Telmatospirillum siberiense]                         | WP_101252614 |
| KS_476 | 1133 | RHG_cluster_061 | 61.047 | 344 | 2.96E-146 |      | Beta-ketoacyl-ACP synthase I [Deltaproteobacteria bacterium]                        | RLB53742     |
| KS_481 | 1154 | RHG_cluster_303 | 72.063 | 383 | 0         |      | Beta-ketoacyl-ACP synthase I [Thermopetrobacter sp. TC1]                            | WP_038035251 |
| KS_484 | 1298 | RHG_cluster_298 | 64.419 | 430 | 8.68E-176 | SupA | SupA [Theonella swinhoei bacterial symbiont clone pSW1H8]                           | ABE03935     |
| KS_486 | 1112 | RHG_cluster_059 | 74.857 | 350 | 0         |      | Beta-ketoacyl synthase [Acidimicrobiales bacterium MED-G01]                         | PDH69975     |
| KS_490 | 1292 | RHG_cluster_213 | 70     | 430 | 0         | SwfA | Type I polyketide synthase [bacterium symbiont of Plakortis simplex pPSA11D7]       | AGH13590     |
| KS_491 | 1286 | RHG_cluster_154 | 81.499 | 427 | 0         | SupA | SupA [Theonella swinhoei bacterial symbiont clone pSW1H8]                           | ABE03935     |
| KS_494 | 1292 | RHG_cluster_072 | 77.622 | 429 | 0         | SwfA | Type I polyketide synthase [bacterium symbiont of Plakortis simplex pPSA11D7]       | AGH13590     |
| KS_495 | 1292 | RHG_cluster_272 | 76.224 | 429 | 0         | SwfA | Type I polyketide synthase [bacterium symbiont of Plakortis simplex pPSA11D7]       | AGH13590     |
| KS_497 | 1286 | RHG_cluster_163 | 78.454 | 427 | 0         | SupA | SupA [Theonella swinhoei bacterial symbiont clone pSW1H8]                           | ABE03935     |
| KS_498 | 1286 | RHG_cluster_322 | 82.201 | 427 | 0         |      | Putative polyketide synthase [uncultured bacterium 2063G]                           | ABB73286     |
| KS_499 | 1094 | RHG_cluster_265 | 73.973 | 365 | 0         |      | Beta-ketoacyl-ACP synthase II [Rhodothermus marinus]                                | WP_014068140 |
| KS_501 | 1286 | RHG_cluster_204 | 87.119 | 427 | 0         | SupA | SupA [Theonella swinhoei bacterial symbiont clone pSW1H8]                           | ABE03935     |

|        |      |                 |        |     |           |      |                                                                                                                 |              |
|--------|------|-----------------|--------|-----|-----------|------|-----------------------------------------------------------------------------------------------------------------|--------------|
| KS_506 | 1286 | RHG_cluster_179 | 90.376 | 426 | 0         | SupA | SupA [Aplysina aerophoba bacterial symbiont clone pAPKS18]                                                      | ABE03915     |
| KS_507 | 1286 | RHG_cluster_057 | 79.859 | 427 | 0         | SupA | SupA [Theonella swinhoei bacterial symbiont clone pSW1H8]                                                       | ABE03935     |
| KS_511 | 1292 | RHG_cluster_090 | 85.948 | 427 | 0         |      | Putative polyketide synthase [uncultured bacterium 2063G]                                                       | ABB73286     |
| KS_516 | 1292 | RHG_cluster_162 | 87.822 | 427 | 0         | SupA | SupA [Theonella swinhoei bacterial symbiont clone pSW1H8]                                                       | ABE03935     |
| KS_517 | 1220 | RHG_cluster_155 | 63.027 | 403 | 0         |      | Beta-ketoacyl-ACP synthase II [Albimonas donghaensis]                                                           | WP_092679786 |
| KS_519 | 1184 | RHG_cluster_065 | 72.843 | 394 | 0         |      | Beta-ketoacyl-[acyl-carrier-protein] synthase II [Candidatus Tectomicrobia bacterium RIFCSPLOWO2_12_FULL_69_37] | OGL61959     |
| KS_520 | 1286 | RHG_cluster_195 | 83.372 | 427 | 0         | SupA | SupA [Theonella swinhoei bacterial symbiont clone pSW1H8]                                                       | ABE03935     |
| KS_525 | 1286 | RHG_cluster_192 | 81.03  | 427 | 0         |      | Putative polyketide synthase [uncultured bacterium 2063G]                                                       | ABB73286     |
| KS_526 | 1148 | RHG_cluster_103 | 69.895 | 382 | 0         |      | Beta-ketoacyl-[acyl-carrier-protein] synthase II [Gammaproteobacteria bacterium RBG_16_51_14]                   | OGT30519     |
| KS_529 | 1292 | RHG_cluster_194 | 82.904 | 427 | 0         | SupA | SupA [Theonella swinhoei bacterial symbiont clone pSW1H8]                                                       | ABE03935     |
| KS_532 | 1286 | RHG_cluster_266 | 80.751 | 426 | 0         | SupA | SupA [Aplysina aerophoba bacterial symbiont clone pAPKS18]                                                      | ABE03915     |
| KS_538 | 1286 | RHG_cluster_160 | 65.728 | 426 | 0         | SupA | SupA [Aplysina aerophoba bacterial symbiont clone pAPKS18]                                                      | ABE03915     |
| KS_541 | 1286 | RHG_cluster_027 | 80.094 | 427 | 0         | SupA | SupA [Theonella swinhoei bacterial symbiont clone pSW1H8]                                                       | ABE03935     |
| KS_543 | 1286 | RHG_cluster_054 | 76.581 | 427 | 0         | SupA | SupA [Theonella swinhoei bacterial symbiont clone pSW1H8]                                                       | ABE03935     |
| KS_545 | 1292 | RHG_cluster_242 | 79.625 | 427 | 0         | SupA | SupA [Theonella swinhoei bacterial symbiont clone pSW1H8]                                                       | ABE03935     |
| KS_548 | 1277 | RHG_cluster_159 | 74.533 | 428 | 0         |      | SA1_PKSA [uncultured bacterial symbiont of Discodermia dissoluta]                                               | AAAY00025    |
| KS_551 | 1292 | RHG_cluster_147 | 86.651 | 427 | 0         | SupA | SupA [Theonella swinhoei bacterial symbiont clone pSW1H8]                                                       | ABE03935     |
| KS_553 | 1250 | RHG_cluster_053 | 70.29  | 414 | 1.36E-178 |      | SA1_PKSA [uncultured bacterial symbiont of Discodermia dissoluta]                                               | AAAY00025    |
| KS_554 | 1283 | RHG_cluster_008 | 87.324 | 426 | 0         | SupA | SupA [Aplysina aerophoba bacterial symbiont clone pAPKS18]                                                      | ABE03915     |
| KS_555 | 1286 | RHG_cluster_177 | 82.436 | 427 | 0         | SupA | SupA [Theonella swinhoei bacterial symbiont clone pSW1H8]                                                       | ABE03935     |
| KS_559 | 1301 | RHG_cluster_285 | 75     | 428 | 0         | SupA | SupA [Aplysina aerophoba bacterial symbiont clone pAPKS18]                                                      | ABE03915     |
| KS_569 | 1292 | RHG_cluster_238 | 84.778 | 427 | 0         | SupA | SupA [Theonella swinhoei bacterial symbiont clone pSW1H8]                                                       | ABE03935     |
| KS_570 | 1073 | RHG_cluster_095 | 54.294 | 326 | 9.24E-117 |      | Beta-ketoacyl-[acyl-carrier-protein] synthase family protein [Rhodospirillaceae bacterium SYSU D60007]          | WP_119262600 |
| KS_572 | 1286 | RHG_cluster_288 | 83.411 | 428 | 0         | SupA | SupA [Theonella swinhoei bacterial symbiont clone pSW1H8]                                                       | ABE03935     |
| KS_573 | 1292 | RHG_cluster_056 | 86.651 | 427 | 0         |      | Putative polyketide synthase [uncultured bacterium 2063G]                                                       | ABB73286     |
| KS_575 | 1067 | RHG_cluster_232 | 56.376 | 298 | 1.05E-118 |      | Beta-ketoacyl-ACP synthase [Alteromonas sp. RKMC-009]                                                           | WP_119502388 |
| KS_577 | 1178 | RHG_cluster_046 | 61.675 | 394 | 3.52E-156 |      | Beta-ketoacyl-[acyl-carrier-protein] synthase family protein [Verminephrobacter aporetectodeae]                 | WP_081479930 |
| KS_581 | 1010 | RHG_cluster_121 | 55.67  | 194 | 3.63E-63  |      | Beta-ketoacyl-ACP synthase [Xanthomonadaceae bacterium]                                                         | RYD16404     |
| KS_583 | 1184 | RHG_cluster_134 | 59.836 | 366 | 3.15E-136 |      | Beta-ketoacyl-[acyl-carrier-protein] synthase family protein [Verminephrobacter aporetectodeae]                 | WP_081479930 |

|        |      |                 |        |     |           |      |                                                                                            |              |
|--------|------|-----------------|--------|-----|-----------|------|--------------------------------------------------------------------------------------------|--------------|
| KS_588 | 1016 | RHG_cluster_125 | 66.803 | 244 | 2.53E-108 |      | Beta-ketoacyl-[acyl-carrier-protein] synthase family protein [Parasulfitortus cantonensis] | WP_131445552 |
| KS_593 | 1283 | RHG_cluster_306 | 74.941 | 423 | 0         |      | SA1_PKSA [uncultured bacterial symbiont of Discodermia dissoluta]                          | AAAY00025    |
| KS_596 | 1259 | RHG_cluster_261 | 63.309 | 417 | 5.76E-172 | SupA | SupA [Theonella swinhoei bacterial symbiont clone pSW1H8]                                  | ABE03935     |
| KS_599 | 1079 | RHG_cluster_182 | 65.138 | 327 | 7.89E-143 |      | Beta-ketoacyl synthase [Gammaproteobacteria bacterium]                                     | TDJ41416     |
| KS_603 | 851  | RHG_cluster_270 | 73.469 | 245 | 1.73E-122 |      | Beta-ketoacyl synthase [Acidobacteria bacterium]                                           | PYQ67687     |
| KS_614 | 1259 | RHG_cluster_262 | 75.54  | 417 | 0         | SupA | SupA [Aplysina aerophoba bacterial symbiont clone pAPKS18]                                 | ABE03915     |
| KS_621 | 1259 | RHG_cluster_208 | 80.336 | 417 | 0         |      | Putative polyketide synthase [uncultured bacterium 2063G]                                  | ABB73286     |
| KS_625 | 1262 | RHG_cluster_289 | 70.167 | 419 | 0         | SupA | SupA [Theonella swinhoei bacterial symbiont clone pSW1H8]                                  | ABE03935     |
| KS_627 | 1265 | RHG_cluster_162 | 84.928 | 418 | 0         | SupA | SupA [Theonella swinhoei bacterial symbiont clone pSW1H8]                                  | ABE03935     |
| KS_628 | 1277 | RHG_cluster_248 | 66.667 | 423 | 1.04E-176 | SupA | SupA [Aplysina aerophoba bacterial symbiont clone pAPKS18]                                 | ABE03915     |
| KS_636 | 1262 | RHG_cluster_119 | 76.123 | 423 | 0         |      | SA1_PKSA [uncultured bacterial symbiont of Discodermia dissoluta]                          | AAAY00025    |
| KS_638 | 1259 | RHG_cluster_226 | 80.144 | 418 | 0         | SupA | SupA [Theonella swinhoei bacterial symbiont clone pSW1H8]                                  | ABE03935     |
| KS_642 | 713  | RHG_cluster_140 | 79.149 | 235 | 3.70E-116 |      | SA1_PKSA [uncultured bacterial symbiont of Discodermia dissoluta]                          | AAAY00025    |
| KS_643 | 1256 | RHG_cluster_233 | 75.352 | 426 | 0         |      | SA1_PKSA [uncultured bacterial symbiont of Discodermia dissoluta]                          | AAAY00025    |
| KS_647 | 1256 | RHG_cluster_229 | 75.12  | 418 | 0         | SupA | SupA [Theonella swinhoei bacterial symbiont clone pSW1H8]                                  | ABE03935     |
| KS_650 | 1235 | RHG_cluster_191 | 72.705 | 414 | 0         |      | SA1_PKSA [uncultured bacterial symbiont of Discodermia dissoluta]                          | AAAY00025    |
| KS_652 | 1259 | RHG_cluster_268 | 68.345 | 417 | 0         | SupA | SupA [Aplysina aerophoba bacterial symbiont clone pAPKS18]                                 | ABE03915     |
| KS_655 | 1244 | RHG_cluster_203 | 66.118 | 425 | 2.01E-175 |      | SA1_PKSA [uncultured bacterial symbiont of Discodermia dissoluta]                          | AAAY00025    |
| KS_657 | 1259 | RHG_cluster_140 | 75.65  | 423 | 0         |      | SA1_PKSA [uncultured bacterial symbiont of Discodermia dissoluta]                          | AAAY00025    |
| KS_660 | 1259 | RHG_cluster_197 | 71.531 | 418 | 0         | SupA | SupA [Theonella swinhoei bacterial symbiont clone pSW1H8]                                  | ABE03935     |
| KS_662 | 1265 | RHG_cluster_062 | 63.397 | 418 | 7.15E-173 | SupA | SupA [Theonella swinhoei bacterial symbiont clone pSW1H8]                                  | ABE03935     |
| KS_664 | 1277 | RHG_cluster_145 | 67.376 | 423 | 0         |      | SA1_PKSA [uncultured bacterial symbiont of Discodermia dissoluta]                          | AAAY00025    |
| KS_666 | 1265 | RHG_cluster_246 | 80.336 | 417 | 0         |      | Putative polyketide synthase [uncultured bacterium 2063G]                                  | ABB73286     |
| KS_668 | 1259 | RHG_cluster_240 | 71.905 | 420 | 0         | SupA | SupA [Theonella swinhoei bacterial symbiont clone pSW1H8]                                  | ABE03935     |
| KS_670 | 1259 | RHG_cluster_014 | 68.106 | 417 | 0         | SupA | SupA [Aplysina aerophoba bacterial symbiont clone pAPKS18]                                 | ABE03915     |
| KS_672 | 1262 | RHG_cluster_198 | 67.703 | 418 | 0         | SupA | SupA [Theonella swinhoei bacterial symbiont clone pSW1H8]                                  | ABE03935     |
| KS_673 | 1268 | RHG_cluster_119 | 74.292 | 424 | 0         |      | SA1_PKSA [uncultured bacterial symbiont of Discodermia dissoluta]                          | AAAY00025    |
| KS_677 | 1259 | RHG_cluster_149 | 69.856 | 418 | 0         | SupA | SupA [Theonella swinhoei bacterial symbiont clone pSW1H8]                                  | ABE03935     |

|        |      |                 |        |     |           |      |                                                                                     |           |
|--------|------|-----------------|--------|-----|-----------|------|-------------------------------------------------------------------------------------|-----------|
| KS_679 | 1253 | RHG_cluster_053 | 58.554 | 415 | 6.49E-145 |      | SA1_PKSA [uncultured bacterial symbiont of Discodermia dissoluta]                   | AAAY00025 |
| KS_682 | 1277 | RHG_cluster_140 | 73.995 | 423 | 0         |      | SA1_PKSA [uncultured bacterial symbiont of Discodermia dissoluta]                   | AAAY00025 |
| KS_685 | 1268 | RHG_cluster_140 | 74.704 | 423 | 0         |      | SA1_PKSA [uncultured bacterial symbiont of Discodermia dissoluta]                   | AAAY00025 |
| KS_689 | 1259 | RHG_cluster_161 | 68.106 | 417 | 0         | SupA | SupA [Aplysina aerophoba bacterial symbiont clone pAPKS18]                          | ABE03915  |
| KS_691 | 1259 | RHG_cluster_164 | 83.213 | 417 | 0         | SupA | SupA [Aplysina aerophoba bacterial symbiont clone pAPKS18]                          | ABE03915  |
| KS_692 | 1259 | RHG_cluster_124 | 76.555 | 418 | 0         | SupA | SupA [Theonella swinhoei bacterial symbiont clone pSW1H8]                           | ABE03935  |
| KS_693 | 1259 | RHG_cluster_037 | 94.724 | 417 | 0         |      | Putative polyketide synthase [uncultured bacterium 2063G]                           | ABB73286  |
| KS_697 | 1265 | RHG_cluster_165 | 80.096 | 417 | 0         |      | Putative polyketide synthase [uncultured bacterium 2063G]                           | ABB73286  |
| KS_700 | 1271 | RHG_cluster_019 | 74.232 | 423 | 0         |      | SA1_PKSA [uncultured bacterial symbiont of Discodermia dissoluta]                   | AAAY00025 |
| KS_704 | 1262 | RHG_cluster_154 | 72.01  | 418 | 0         | SupA | SupA [Theonella swinhoei bacterial symbiont clone pSW1H8]                           | ABE03935  |
| KS_707 | 1262 | RHG_cluster_069 | 82.297 | 418 | 0         | SupA | SupA [Theonella swinhoei bacterial symbiont clone pSW1H8]                           | ABE03935  |
| KS_712 | 1259 | RHG_cluster_100 | 80.815 | 417 | 0         |      | Putative polyketide synthase [uncultured bacterium 2063G]                           | ABB73286  |
| KS_714 | 1256 | RHG_cluster_040 | 61.631 | 417 | 5.15E-171 | SupA | SupA [uncultured marine bacterium 1k6]                                              | ACX49735  |
| KS_715 | 1259 | RHG_cluster_090 | 68.9   | 418 | 0         |      | SupA [Theonella swinhoei bacterial symbiont clone pSW1H8]                           | ABE03935  |
| KS_719 | 1259 | RHG_cluster_056 | 70.743 | 417 | 0         |      | SupA [Aplysina aerophoba bacterial symbiont clone pAPKS18]                          | ABE03915  |
| KS_723 | 1256 | RHG_cluster_054 | 66.905 | 420 | 0         | SupA | SupA [Theonella swinhoei bacterial symbiont clone pSW1H8]                           | ABE03935  |
| KS_724 | 1259 | RHG_cluster_057 | 73.684 | 418 | 0         | SupA | SupA [Theonella swinhoei bacterial symbiont clone pSW1H8]                           | ABE03935  |
| KS_727 | 1259 | RHG_cluster_179 | 87.05  | 417 | 0         | SupA | SupA [Aplysina aerophoba bacterial symbiont clone pAPKS18]                          | ABE03915  |
| KS_729 | 1265 | RHG_cluster_027 | 68.9   | 418 | 0         | SupA | SupA [Theonella swinhoei bacterial symbiont clone pSW1H8]                           | ABE03935  |
| KS_733 | 1262 | RHG_cluster_147 | 74.463 | 419 | 0         | SupA | Polyketide synthase, partial [Aplysina aerophoba bacterial symbiont clone pAE27P20] | ABE03895  |
| KS_735 | 1124 | RHG_cluster_194 | 70.588 | 374 | 2.24E-170 | SupA | SupA [Aplysina aerophoba bacterial symbiont clone pAPKS18]                          | ABE03915  |
| KS_738 | 1277 | RHG_cluster_159 | 76.359 | 423 | 0         |      | SA1_PKSA [uncultured bacterial symbiont of Discodermia dissoluta]                   | AAAY00025 |
| KS_741 | 1259 | RHG_cluster_008 | 75.3   | 417 | 0         | SupA | SupA [Aplysina aerophoba bacterial symbiont clone pAPKS18]                          | ABE03915  |
| KS_744 | 1262 | RHG_cluster_087 | 66.986 | 418 | 0         | SupA | SupA [Theonella swinhoei bacterial symbiont clone pSW1H8]                           | ABE03935  |
| KS_746 | 1274 | RHG_cluster_177 | 68.779 | 426 | 0         | SupA | SupA [Theonella swinhoei bacterial symbiont clone pSW1H8]                           | ABE03935  |
| KS_754 | 1262 | RHG_cluster_193 | 75.887 | 423 | 0         |      | SA1_PKSA [uncultured bacterial symbiont of Discodermia dissoluta]                   | AAAY00025 |
| KS_758 | 1250 | RHG_cluster_119 | 72.471 | 425 | 0         |      | SA1_PKSA [uncultured bacterial symbiont of Discodermia dissoluta]                   | AAAY00025 |
| KS_759 | 1268 | RHG_cluster_019 | 74.468 | 423 | 0         |      | SA1_PKSA [uncultured bacterial symbiont of Discodermia dissoluta]                   | AAAY00025 |



Table S10. BLAST search of the KS sequences from the metagenome of *Sphēciospongia* sp. against the nr database in NCBI

| KS ID  | Length (nt) | BGC ID          | Identity (%) | Alignment length (aa) | E-value   | Sponge-specific cluster | The homologous sequences                                                                | Accession number |
|--------|-------------|-----------------|--------------|-----------------------|-----------|-------------------------|-----------------------------------------------------------------------------------------|------------------|
| KS_002 | 1086        | SPV_cluster_403 | 81.844       | 358                   | 0         |                         | Beta-ketoacyl-ACP synthase II [Thioalkalivibrio sp. HK1]                                | WP_038098656     |
| KS_003 | 459         | SPV_cluster_447 | 84.667       | 150                   | 7.00E-77  | SupA                    | SupA [Aplysina aerophoba bacterial symbiont clone pAPKS18]                              | ABE03915         |
| KS_005 | 1266        | SPV_cluster_194 | 74.762       | 420                   | 0         | SwfA                    | Type I polyketide synthase [bacterium symbiont of Plakortis simplex pPSA11D7]           | AGH13590         |
| KS_008 | 1266        | SPV_cluster_115 | 80.523       | 421                   | 0         | SupA                    | SupA [uncultured marine bacterium 1k6]                                                  | ACX49735         |
| KS_009 | 663         | SPV_cluster_191 | 68.9         | 209                   | 2.71E-92  |                         | SA1_PKSA [uncultured bacterial symbiont of Discodermia dissoluta]                       | AAAY00025        |
| KS_015 | 435         | SPV_cluster_422 | 84.615       | 143                   | 3.46E-73  |                         | Putative polyketide synthase [uncultured bacterium 2063G]                               | ABB73286         |
| KS_017 | 696         | SPV_cluster_454 | 81.498       | 227                   | 8.97E-112 | SwfA                    | Type I polyketide synthase [bacterium symbiont of Plakortis simplex pPS11G3]            | AGH13577         |
| KS_018 | 1266        | SPV_cluster_241 | 80.523       | 421                   | 0         | SupA                    | SupA [uncultured marine bacterium 1k6]                                                  | ACX49735         |
| KS_022 | 783         | SPV_cluster_440 | 71.318       | 258                   | 7.56E-114 | SupA                    | Polyketide synthase, partial [Aplysina aerophoba bacterial symbiont clone pAE27P20]     | ABE03895         |
| KS_023 | 297         | SPV_cluster_287 | 63.542       | 96                    | 1.37E-32  | SupA                    | SupA [Theonella swinhoei bacterial symbiont clone pSW1H8]                               | ABE03935         |
| KS_024 | 945         | SPV_cluster_405 | 87.762       | 286                   | 1.14E-162 |                         | Putative polyketide synthase [uncultured bacterium 2063G]                               | ABB73286         |
| KS_025 | 1221        | SPV_cluster_202 | 70.324       | 401                   | 0         | SupA                    | SupA [Theonella swinhoei bacterial symbiont clone pSW1H8]                               | ABE03935         |
| KS_027 | 351         | SPV_cluster_456 | 77.193       | 114                   | 1.29E-50  | SupA                    | SupA [Theonella swinhoei bacterial symbiont clone pSW1H8]                               | ABE03935         |
| KS_031 | 744         | SPV_cluster_302 | 69.919       | 246                   | 9.68E-108 | SupA                    | SupA [Theonella swinhoei bacterial symbiont clone pSW1H8]                               | ABE03935         |
| KS_034 | 1077        | SPV_cluster_360 | 68.451       | 355                   | 6.99E-155 |                         | SA1_PKSA [uncultured bacterial symbiont of Discodermia dissoluta]                       | AAAY00025        |
| KS_035 | 1014        | SPV_cluster_461 | 68.249       | 337                   | 3.54E-167 |                         | Beta-ketoacyl-[acyl-carrier-protein] synthase II [Gammaproteobacteria bacterium TMED30] | OUU04838         |
| KS_038 | 1113        | SPV_cluster_096 | 82.88        | 368                   | 0         | SupA                    | SupA [Aplysina aerophoba bacterial symbiont clone pAPKS18]                              | ABE03915         |
| KS_042 | 669         | SPV_cluster_382 | 79.524       | 210                   | 4.05E-107 | SupA                    | SupA [Aplysina aerophoba bacterial symbiont clone pAPKS18]                              | ABE03915         |
| KS_047 | 1113        | SPV_cluster_418 | 66.209       | 364                   | 1.80E-158 | SupA                    | SupA [Theonella swinhoei bacterial symbiont clone pSW1H8]                               | ABE03935         |
| KS_049 | 438         | SPV_cluster_450 | 69.231       | 143                   | 2.14E-58  | SupA                    | SupA [Aplysina aerophoba bacterial symbiont clone pAPKS18]                              | ABE03915         |
| KS_050 | 279         | SPV_cluster_446 | 68.889       | 90                    | 5.62E-35  | SupA                    | SupA [uncultured marine bacterium 1k6]                                                  | ACX49735         |
| KS_051 | 531         | SPV_cluster_451 | 71.345       | 171                   | 1.02E-73  | SupA                    | SupA [Aplysina aerophoba bacterial symbiont clone pAPKS18]                              | ABE03915         |
| KS_055 | 312         | SPV_cluster_391 | 93.137       | 102                   | 3.31E-57  | SwfA                    | Type I polyketide synthase [bacterium symbiont of Plakortis simplex pPS11G3]            | AGH13577         |
| KS_057 | 849         | SPV_cluster_378 | 80.727       | 275                   | 1.51E-143 |                         | Putative polyketide synthase [uncultured bacterium 2063G]                               | ABB73286         |
| KS_058 | 954         | SPV_cluster_384 | 79.43        | 316                   | 4.34E-162 | SupA                    | SupA [Theonella swinhoei bacterial symbiont clone pSW1H8]                               | ABE03935         |

|        |      |                 |        |     |           |      |                                                                                                           |              |
|--------|------|-----------------|--------|-----|-----------|------|-----------------------------------------------------------------------------------------------------------|--------------|
| KS_059 | 570  | SPV_cluster_455 | 84.409 | 186 | 2.30E-95  | SupA | SupA [Theonella swinhoei bacterial symbiont clone pSW1H8]                                                 | ABE03935     |
| KS_068 | 888  | SPV_cluster_333 | 83.154 | 279 | 4.69E-149 | SupA | SupA [Theonella swinhoei bacterial symbiont clone pSW1H8]                                                 | ABE03935     |
| KS_070 | 1023 | SPV_cluster_408 | 68.373 | 332 | 5.49E-170 |      | Beta-ketoacyl synthase [marine gamma proteobacterium HTCC2148]                                            | WP_007229230 |
| KS_072 | 912  | SPV_cluster_428 | 89.825 | 285 | 2.82E-165 | SupA | SupA [Aplysina aerophoba bacterial symbiont clone pAPKS18]                                                | ABE03915     |
| KS_076 | 713  | SPV_cluster_204 | 79.638 | 221 | 1.43E-110 | SwfA | Type I polyketide synthase [bacterium symbiont of Plakortis simplex pPS11G3]                              | AGH13577     |
| KS_081 | 1118 | SPV_cluster_373 | 68.633 | 373 | 1.14E-166 | SupA | SupA [Theonella swinhoei bacterial symbiont clone pSW1H8]                                                 | ABE03935     |
| KS_082 | 1166 | SPV_cluster_273 | 75.758 | 363 | 0         | SupA | SupA [Theonella swinhoei bacterial symbiont clone pSW1H8]                                                 | ABE03935     |
| KS_085 | 1112 | SPV_cluster_396 | 79.076 | 368 | 0         | SupA | SupA [Theonella swinhoei bacterial symbiont clone pSW1H8]                                                 | ABE03935     |
| KS_086 | 671  | SPV_cluster_323 | 85.047 | 214 | 1.38E-116 | SupA | SupA [Theonella swinhoei bacterial symbiont clone pSW1H8]                                                 | ABE03935     |
| KS_087 | 1097 | SPV_cluster_425 | 83.516 | 364 | 0         | SupA | SupA [Theonella swinhoei bacterial symbiont clone pSW1H8]                                                 | ABE03935     |
| KS_089 | 929  | SPV_cluster_347 | 89.123 | 285 | 1.89E-163 | SupA | SupA [Aplysina aerophoba bacterial symbiont clone pAPKS18]                                                | ABE03915     |
| KS_090 | 398  | SPV_cluster_386 | 80     | 130 | 2.33E-62  | SwfA | Type I polyketide synthase [bacterium symbiont of Plakortis simplex pPSA11D7]                             | AGH13590     |
| KS_092 | 1133 | SPV_cluster_423 | 98.143 | 377 | 0         |      | Beta-ketoacyl-[acyl-carrier-protein] synthase II [Candidatus Poribacteria bacterium]                      | RKU17865     |
| KS_093 | 1085 | SPV_cluster_279 | 72.222 | 360 | 0         |      | Beta-ketoacyl-[acyl-carrier-protein] synthase II [Acidobacteria bacterium]                                | PYV30312     |
| KS_097 | 914  | SPV_cluster_292 | 68.864 | 273 | 2.78E-120 | SupA | SupA [Theonella swinhoei bacterial symbiont clone pSW1H8]                                                 | ABE03935     |
| KS_099 | 1061 | SPV_cluster_262 | 69.516 | 351 | 1.88E-180 |      | Beta-ketoacyl-[acyl-carrier-protein] synthase II [Chloroflexi bacterium]                                  | RLT43681     |
| KS_100 | 1292 | SPV_cluster_356 | 74.126 | 429 | 0         | SwfA | Type I polyketide synthase [bacterium symbiont of Plakortis simplex pPSA11D7]                             | AGH13590     |
| KS_114 | 1043 | SPV_cluster_318 | 74.203 | 345 | 0         |      | Beta-ketoacyl-ACP synthase I [Neptuniibacter pectenicola]                                                 | WP_067983865 |
| KS_118 | 1223 | SPV_cluster_209 | 93.857 | 407 | 0         |      | Beta-ketoacyl-[acyl-carrier-protein] synthase II [Candidatus Poribacteria bacterium]                      | RKU31990     |
| KS_119 | 1199 | SPV_cluster_043 | 67.506 | 397 | 0         |      | Beta-ketoacyl-[acyl-carrier-protein] synthase family protein [Halocynthiibacter namhaensis]               | WP_039018003 |
| KS_121 | 1223 | SPV_cluster_417 | 86.765 | 408 | 0         |      | Beta-ketoacyl-[acyl-carrier-protein] synthase II [Candidatus Poribacteria bacterium]                      | RKU31990     |
| KS_122 | 1184 | SPV_cluster_401 | 75.949 | 395 | 0         |      | Beta-ketoacyl-ACP synthase I [Methylarcula marina]                                                        | WP_106692425 |
| KS_123 | 1223 | SPV_cluster_099 | 75.862 | 406 | 0         |      | Beta-ketoacyl-[acyl-carrier-protein] synthase II [Gammaproteobacteria bacterium]                          | TDJ17613     |
| KS_124 | 1202 | SPV_cluster_375 | 75.689 | 399 | 0         |      | Beta-ketoacyl-[acyl-carrier-protein] synthase I [Gammaproteobacteria bacterium RIFCSPLOWO2_02_FULL_61_13] | OGT79717     |
| KS_125 | 1250 | SPV_cluster_160 | 73.366 | 413 | 0         |      | Beta-ketoacyl-ACP synthase II [Rhodospirillales bacterium URHD0088]                                       | WP_027300572 |
| KS_127 | 1205 | SPV_cluster_228 | 96.02  | 402 | 0         |      | Beta-ketoacyl-ACP synthase I [Rhodospirillaceae bacterium]                                                | WP_108794197 |

|        |      |                 |        |     |           |      |                                                                                                           |              |
|--------|------|-----------------|--------|-----|-----------|------|-----------------------------------------------------------------------------------------------------------|--------------|
|        |      |                 |        |     |           |      | Spongia-Bin9]                                                                                             |              |
| KS_128 | 1223 | SPV_cluster_054 | 87.5   | 408 | 0         |      | Beta-ketoacyl-[acyl-carrier-protein] synthase II [Candidatus Poribacteria bacterium]                      | RKU31990     |
| KS_129 | 1223 | SPV_cluster_033 | 94.363 | 408 | 0         |      | Beta-ketoacyl-[acyl-carrier-protein] synthase II [Candidatus Poribacteria bacterium]                      | RKU30153     |
| KS_132 | 1196 | SPV_cluster_416 | 70.352 | 398 | 0         |      | Beta-ketoacyl-[acyl-carrier-protein] synthase I [OM182 bacterium MED-G28]                                 | PDH34065     |
| KS_133 | 998  | SPV_cluster_358 | 68.358 | 335 | 5.97E-169 |      | Beta-ketoacyl-[acyl-carrier-protein] synthase II [Chloroflexi bacterium]                                  | RIK44110     |
| KS_136 | 1223 | SPV_cluster_324 | 92.875 | 407 | 0         |      | Beta-ketoacyl-[acyl-carrier-protein] synthase II [Candidatus Poribacteria bacterium]                      | RKU30153     |
| KS_139 | 1202 | SPV_cluster_293 | 73.116 | 398 | 0         |      | 3-Oxoacyl-ACP synthase [OM182 bacterium BACL3 MAG-120507-bin80]                                           | KRO71573     |
| KS_141 | 1211 | SPV_cluster_230 | 78.5   | 400 | 0         |      | Beta-ketoacyl-ACP synthase I [Paracoccus sphaerophysae]                                                   | WP_036717493 |
| KS_145 | 1256 | SPV_cluster_074 | 70.12  | 415 | 0         |      | Beta-ketoacyl-ACP synthase II [alpha proteobacterium BAL199]                                              | WP_040746409 |
| KS_147 | 1208 | SPV_cluster_155 | 78.412 | 403 | 0         |      | 3-Oxoacyl-[acyl-carrier-protein] synthase 1 [Alphaproteobacteria bacterium MarineAlpha3 Bin7]             | PPR64109     |
| KS_149 | 1223 | SPV_cluster_076 | 81.773 | 406 | 0         |      | Beta-ketoacyl-ACP synthase II [Thioalkalivibrio sp. HK1]                                                  | WP_038098656 |
| KS_152 | 1226 | SPV_cluster_251 | 58.824 | 408 | 0         |      | Beta-ketoacyl-[acyl-carrier-protein] synthase II [Spirochaetes bacterium RBG 13 68 11]                    | OHD73861     |
| KS_155 | 1058 | SPV_cluster_438 | 73.295 | 352 | 0         |      | Beta-ketoacyl-[acyl-carrier-protein] synthase I [Gammaproteobacteria bacterium RIFCSPLOWO2 02 FULL 61 13] | OGT79717     |
| KS_156 | 1100 | SPV_cluster_349 | 61.538 | 364 | 1.08E-160 |      | Beta-ketoacyl-ACP synthase II [Spirochaeta lutea]                                                         | WP_037548043 |
| KS_157 | 1223 | SPV_cluster_032 | 81.818 | 407 | 0         |      | Beta-ketoacyl-[acyl-carrier-protein] synthase II [bacterium]                                              | RZP29941     |
| KS_158 | 1220 | SPV_cluster_233 | 66.501 | 403 | 5.66E-180 |      | Beta-ketoacyl-[acyl-carrier-protein] synthase family protein [Acidobacteria bacterium]                    | REJ81214     |
| KS_160 | 1286 | SPV_cluster_245 | 80.986 | 426 | 0         | SupA | SupA [Aplysina aerophoba bacterial symbiont clone pAPKS18]                                                | ABE03915     |
| KS_164 | 1223 | SPV_cluster_329 | 72.059 | 408 | 0         |      | Beta-ketoacyl-[acyl-carrier-protein] synthase II [Acidobacteria bacterium RIFCSPLOWO2 02 FULL 67 21]      | OFW15863     |
| KS_165 | 1223 | SPV_cluster_039 | 94.103 | 407 | 0         |      | Beta-ketoacyl-[acyl-carrier-protein] synthase II [Candidatus Poribacteria bacterium]                      | RKU10113     |
| KS_168 | 1223 | SPV_cluster_002 | 64.619 | 407 | 0         |      | 3-Oxoacyl-ACP synthase [candidate division Zixibacteria bacterium SM23_81]                                | KPL19508     |
| KS_169 | 1253 | SPV_cluster_413 | 71.053 | 418 | 0         | SupA | SupA [Theonella swinhoei bacterial symbiont clone pSW1H8]                                                 | ABE03935     |
| KS_171 | 1223 | SPV_cluster_235 | 74.201 | 407 | 0         |      | Beta-ketoacyl-[acyl-carrier-protein] synthase II [Acidobacteria bacterium]                                | TDI09580     |
| KS_172 | 1229 | SPV_cluster_014 | 68.689 | 412 | 0         |      | Beta-ketoacyl-[acyl-carrier-protein] synthase II [Gemmatimonadetes bacterium]                             | RMH15744     |
| KS_177 | 1292 | SPV_cluster_421 | 75.291 | 429 | 0         | SwfA | Type I polyketide synthase [bacterium symbiont of Plakortis simplex pPSA11D7]                             | AGH13590     |

|        |      |                 |        |     |           |                                                                                                        |              |
|--------|------|-----------------|--------|-----|-----------|--------------------------------------------------------------------------------------------------------|--------------|
| KS_180 | 1028 | SPV_cluster_432 | 65.116 | 344 | 5.45E-153 | Beta-ketoacyl-ACP synthase II [Chloroflexi bacterium G233]                                             | WP_098504503 |
| KS_184 | 1217 | SPV_cluster_430 | 68.148 | 405 | 0         | 3-Oxoacyl-[acyl-carrier-protein] synthase 2 [bacterium HR37]                                           | GBD38054     |
| KS_185 | 1052 | SPV_cluster_411 | 53.374 | 326 | 3.08E-114 | Beta-ketoacyl-[acyl-carrier-protein] synthase family protein [Rhodospirillaceae bacterium SYSU D60007] | WP_119262600 |
| KS_187 | 1223 | SPV_cluster_254 | 67.734 | 406 | 0         | Beta-ketoacyl-[acyl-carrier-protein] synthase II [Gammaproteobacteria bacterium]                       | TDJ29040     |
| KS_190 | 1223 | SPV_cluster_284 | 73.037 | 382 | 0         | Beta-ketoacyl-[acyl-carrier-protein] synthase II [SAR86 cluster bacterium]                             | PCJ26052     |
| KS_192 | 1202 | SPV_cluster_138 | 61.443 | 402 | 2.00E-176 | Beta-ketoacyl-ACP synthase [Pseudoduganella violaceinigra]                                             | WP_028104973 |
| KS_194 | 1229 | SPV_cluster_317 | 58.477 | 407 | 1.39E-150 | Beta-ketoacyl-[acyl-carrier-protein] synthase II [Deltaproteobacteria bacterium]                       | TDJ21427     |
| KS_200 | 1223 | SPV_cluster_258 | 68.395 | 405 | 0         | Beta-ketoacyl-[acyl-carrier-protein] synthase II [Acidobacteria bacterium]                             | RPH64142     |
| KS_207 | 1223 | SPV_cluster_389 | 75.979 | 383 | 0         | Beta-ketoacyl-[acyl-carrier-protein] synthase II [Gammaproteobacteria bacterium]                       | TDJ17613     |
| KS_209 | 1220 | SPV_cluster_128 | 69.458 | 406 | 0         | Beta-ketoacyl-[acyl-carrier-protein] synthase II [Gammaproteobacteria bacterium]                       | TDJ41741     |
| KS_210 | 1214 | SPV_cluster_009 | 68.564 | 404 | 0         | 3-Oxoacyl-(acyl-carrier-protein) synthase [uncultured actinobacterium HF0770_13M05]                    | ADI23284     |
| KS_211 | 1340 | SPV_cluster_001 | 53.437 | 451 | 7.41E-146 | Hypothetical protein D7X12_09075, partial [Corallococcus sicarius]                                     | RKH45034     |
| KS_213 | 1229 | SPV_cluster_441 | 54.657 | 408 | 5.13E-165 | Beta-ketoacyl-ACP synthase II [Spirochaeta lutea]                                                      | WP_037548043 |
| KS_214 | 1223 | SPV_cluster_289 | 70.588 | 408 | 0         | Beta-ketoacyl-[acyl-carrier-protein] synthase II [Gammaproteobacteria bacterium]                       | TDJ29040     |
| KS_215 | 1214 | SPV_cluster_239 | 71.921 | 406 | 7.58E-180 | Beta-ketoacyl-ACP synthase II [Chloroflexi bacterium G233]                                             | WP_098504331 |
| KS_216 | 1226 | SPV_cluster_003 | 61.425 | 407 | 4.00E-179 | MULTISPECIES: Beta-ketoacyl-ACP synthase II [Pseudomonadaceae]                                         | WP_096004673 |
| KS_219 | 1199 | SPV_cluster_148 | 72.475 | 396 | 0         | MULTISPECIES: Beta-ketoacyl-[acyl-carrier-protein] synthase family protein [Rhodovulum]                | WP_075786012 |
| KS_226 | 1157 | SPV_cluster_086 | 62.565 | 382 | 8.48E-158 | Beta-ketoacyl synthase [Actinobacteria bacterium]                                                      | RUA23523     |
| KS_228 | 1223 | SPV_cluster_195 | 56.02  | 407 | 2.04E-173 | Beta-ketoacyl-[acyl-carrier-protein] synthase II [Chloroflexi bacterium]                               | RMG78893     |
| KS_229 | 1217 | SPV_cluster_280 | 69.212 | 406 | 0         | Beta-ketoacyl-[acyl-carrier-protein] synthase II [Gammaproteobacteria bacterium RBG_16_51_14]          | OGT30519     |
| KS_230 | 1223 | SPV_cluster_037 | 71.253 | 407 | 0         | MULTISPECIES: Beta-ketoacyl-ACP synthase II [Ectothiorhodospira]                                       | WP_025281708 |
| KS_233 | 1217 | SPV_cluster_060 | 69.136 | 405 | 0         | Beta-ketoacyl-[acyl-carrier-protein] synthase II [Gammaproteobacteria bacterium RBG_16_51_14]          | OGT30519     |
| KS_234 | 1217 | SPV_cluster_121 | 69.458 | 406 | 0         | Beta-ketoacyl-[acyl-carrier-protein] synthase II [Gammaproteobacteria bacterium RBG_16_51_14]          | OGT30519     |
| KS_238 | 1217 | SPV_cluster_180 | 69.136 | 405 | 0         | 3-Oxoacyl-[acyl-carrier-protein] synthase 2 [bacterium HR37]                                           | GBD38054     |
| KS_241 | 1163 | SPV_cluster_207 | 68.504 | 381 | 0         | Beta-ketoacyl-[acyl-carrier-protein] synthase II                                                       | TDJ41741     |

|        |      |                 |        |     |           |      |                                                                                                                      |              |
|--------|------|-----------------|--------|-----|-----------|------|----------------------------------------------------------------------------------------------------------------------|--------------|
|        |      |                 |        |     |           |      | [Gammaproteobacteria bacterium]                                                                                      |              |
| KS_242 | 1226 | SPV_cluster_445 | 62.162 | 407 | 0         |      | Beta-ketoacyl-[acyl-carrier-protein] synthase II [Proteobacteria bacterium]                                          | PZN30994     |
| KS_243 | 1217 | SPV_cluster_015 | 70.968 | 403 | 0         |      | Beta-ketoacyl-[acyl-carrier-protein] synthase II [Gammaproteobacteria bacterium]                                     | TDJ36329     |
| KS_245 | 1235 | SPV_cluster_178 | 69.082 | 414 | 0         |      | Beta-ketoacyl-ACP synthase II [Meinhardsimonia xiamenensis]                                                          | WP_092498652 |
| KS_246 | 1187 | SPV_cluster_126 | 50.598 | 251 | 1.93E-71  |      | Beta-ketoacyl-[acyl-carrier-protein] synthase family protein [Legionella drozanskii]                                 | WP_058494995 |
| KS_248 | 1220 | SPV_cluster_197 | 69.458 | 406 | 0         |      | Beta-ketoacyl-[acyl-carrier-protein] synthase II [Gammaproteobacteria bacterium]                                     | TDJ41741     |
| KS_251 | 1247 | SPV_cluster_101 | 73.058 | 412 | 0         |      | Beta-ketoacyl-ACP synthase II [Rhodospirillaceae bacterium SYSU D60014]                                              | WP_119459592 |
| KS_255 | 1229 | SPV_cluster_222 | 62.347 | 409 | 0         |      | Beta-ketoacyl-ACP synthase II [Nitrosomonas aestuarii]                                                               | WP_090702733 |
| KS_257 | 1292 | SPV_cluster_426 | 75.524 | 429 | 0         | SwfA | Type I polyketide synthase [bacterium symbiont of Plakortis simplex pPSA11D7]                                        | AGH13590     |
| KS_258 | 1220 | SPV_cluster_036 | 64.268 | 403 | 2.41E-167 |      | Beta-ketoacyl-[acyl-carrier-protein] synthase family protein [Acidobacteria bacterium]                               | REJ81214     |
| KS_260 | 1226 | SPV_cluster_419 | 62.347 | 409 | 0         |      | Beta-ketoacyl-[acyl-carrier-protein] synthase II [Candidatus Handelsmanbacteria bacterium RIFCSPLOWO2_12_FULL_64_10] | OGG49603     |
| KS_265 | 1292 | SPV_cluster_091 | 78.322 | 429 | 0         | SwfA | Type I polyketide synthase [bacterium symbiont of Plakortis simplex pPSA11D7]                                        | AGH13590     |
| KS_268 | 1292 | SPV_cluster_172 | 92.381 | 420 | 0         | SwfA | Type I polyketide synthase [bacterium symbiont of Plakortis simplex pPS11G3]                                         | AGH13577     |
| KS_271 | 1220 | SPV_cluster_255 | 67.241 | 406 | 0         |      | Beta-ketoacyl-[acyl-carrier-protein] synthase II [Acidobacteria bacterium]                                           | RMH20421     |
| KS_272 | 1286 | SPV_cluster_005 | 80.14  | 428 | 0         | SupA | SupA [Theonella swinhoei bacterial symbiont clone pSW1H8]                                                            | ABE03935     |
| KS_273 | 1220 | SPV_cluster_025 | 68.966 | 406 | 0         |      | Beta-ketoacyl-[acyl-carrier-protein] synthase II [Acidobacteria bacterium]                                           | RMH20421     |
| KS_274 | 1226 | SPV_cluster_024 | 71.144 | 402 | 0         |      | Beta-ketoacyl-[acyl-carrier-protein] synthase II [Candidatus Handelsmanbacteria bacterium RIFCSPLOWO2_12_FULL_64_10] | OGG49603     |
| KS_275 | 1229 | SPV_cluster_031 | 65.366 | 410 | 0         |      | Beta-ketoacyl-[acyl-carrier-protein] synthase II [Gemmatimonadetes bacterium]                                        | RMH15744     |
| KS_276 | 1223 | SPV_cluster_217 | 72.414 | 406 | 0         |      | Beta-ketoacyl-[acyl-carrier-protein] synthase II [Gammaproteobacteria bacterium TMED119]                             | OUV63604     |
| KS_277 | 1151 | SPV_cluster_129 | 78.272 | 382 | 0         |      | Beta-ketoacyl synthase [Acidimicrobiales bacterium MED-G01]                                                          | PDH69975     |
| KS_280 | 1151 | SPV_cluster_229 | 79.167 | 384 | 2.73E-175 |      | 3-Oxoacyl-[acyl-carrier-protein] synthase II [Chloroflexi bacterium]                                                 | PZC49279     |
| KS_281 | 1292 | SPV_cluster_035 | 79.859 | 427 | 0         | SupA | SupA [Theonella swinhoei bacterial symbiont clone pSW1H8]                                                            | ABE03935     |
| KS_282 | 1226 | SPV_cluster_159 | 83.619 | 409 | 0         |      | 3-Oxoacyl-[acyl-carrier-protein] synthase II [Chloroflexi bacterium]                                                 | PZC46532     |

|        |      |                 |        |     |           |      |                                                                                              |              |
|--------|------|-----------------|--------|-----|-----------|------|----------------------------------------------------------------------------------------------|--------------|
| KS_286 | 1229 | SPV_cluster_402 | 63.882 | 407 | 0         |      | Beta-ketoacyl-[acyl-carrier-protein] synthase II [Actinobacteria bacterium RBG_16_68_21]     | OFW66625     |
| KS_287 | 1289 | SPV_cluster_214 | 71.262 | 428 | 0         | SupA | SupA [Theonella swinhoei bacterial symbiont clone pSW1H8]                                    | ABE03935     |
| KS_288 | 1289 | SPV_cluster_040 | 71.963 | 428 | 0         | SupA | SupA [Theonella swinhoei bacterial symbiont clone pSW1H8]                                    | ABE03935     |
| KS_289 | 1286 | SPV_cluster_225 | 64.371 | 421 | 0         |      | SDR family NAD(P)-dependent oxidoreductase [Cocleimonas flava]                               | WP_131906443 |
| KS_291 | 1223 | SPV_cluster_107 | 69.779 | 407 | 0         |      | Beta-ketoacyl-[acyl-carrier-protein] synthase II [Polyangiaceae bacterium UTPRO1]            | OQY68774     |
| KS_293 | 1292 | SPV_cluster_161 | 83.411 | 428 | 0         | SwfA | Type I polyketide synthase [bacterium symbiont of Plakortis simplex pPSA11D7]                | AGH13590     |
| KS_297 | 1214 | SPV_cluster_085 | 68.069 | 404 | 0         |      | Beta-ketoacyl-[acyl-carrier-protein] synthase II [Chloroflexi bacterium]                     | RME76096     |
| KS_301 | 1154 | SPV_cluster_093 | 53.786 | 383 | 3.88E-131 |      | Hypothetical protein [Pelagimonas phthalica]                                                 | WP_099241578 |
| KS_303 | 1286 | SPV_cluster_084 | 80.047 | 426 | 0         | SupA | Polyketide synthase, partial [Aplysina aerophoba bacterial symbiont clone pAE27P20]          | ABE03895     |
| KS_305 | 1067 | SPV_cluster_406 | 63.746 | 331 | 2.33E-150 |      | Beta-ketoacyl-[acyl-carrier-protein] synthase II [Chloroflexi bacterium HGW-Chloroflexi-9]   | PKN82890     |
| KS_306 | 1286 | SPV_cluster_268 | 79.859 | 427 | 0         |      | Putative polyketide synthase [uncultured bacterium 2063G]                                    | ABB73286     |
| KS_307 | 1259 | SPV_cluster_312 | 71.36  | 419 | 0         |      | Beta-ketoacyl-[acyl-carrier-protein] synthase family protein [Deltaproteobacteria bacterium] | TDJ13656     |
| KS_308 | 1154 | SPV_cluster_124 | 51.558 | 353 | 8.38E-110 |      | Hypothetical protein [Pelagimonas phthalica]                                                 | WP_099241578 |
| KS_310 | 1223 | SPV_cluster_400 | 66.585 | 407 | 0         |      | Beta-ketoacyl-[acyl-carrier-protein] synthase II [Chloroflexi bacterium]                     | TDI92680     |
| KS_312 | 1160 | SPV_cluster_113 | 70.605 | 347 | 1.84E-166 |      | Beta-ketoacyl synthase [Actinobacteria bacterium]                                            | RUA23523     |
| KS_315 | 1160 | SPV_cluster_320 | 69.452 | 383 | 0         |      | Beta-ketoacyl synthase [Actinobacteria bacterium]                                            | RUA23523     |
| KS_317 | 1160 | SPV_cluster_224 | 70.893 | 347 | 1.43E-168 |      | Beta-ketoacyl synthase [Actinobacteria bacterium]                                            | RUA23523     |
| KS_321 | 1217 | SPV_cluster_081 | 66.832 | 404 | 0         |      | Beta-ketoacyl-[acyl-carrier-protein] synthase II [Chloroflexi bacterium]                     | RME76096     |
| KS_323 | 1286 | SPV_cluster_253 | 81.499 | 427 | 0         |      | Putative polyketide synthase [uncultured bacterium 2063G]                                    | ABB73286     |
| KS_326 | 1223 | SPV_cluster_353 | 80.882 | 408 | 0         |      | 3-Oxoacyl-[acyl-carrier-protein] synthase II [Chloroflexi bacterium]                         | PZC47099     |
| KS_332 | 1286 | SPV_cluster_171 | 80.562 | 427 | 0         |      | Putative polyketide synthase [uncultured bacterium 2063G]                                    | ABB73286     |
| KS_336 | 1292 | SPV_cluster_163 | 74.825 | 429 | 0         | SwfA | Type I polyketide synthase [bacterium symbiont of Plakortis simplex pPSA11D7]                | AGH13590     |
| KS_337 | 1292 | SPV_cluster_153 | 84.309 | 427 | 0         | SwfA | Type I polyketide synthase [bacterium symbiont of Plakortis simplex pPSA11D7]                | AGH13590     |
| KS_339 | 1292 | SPV_cluster_310 | 76.347 | 427 | 0         | SwfA | Type I polyketide synthase [bacterium symbiont of Plakortis simplex pPSA11D7]                | AGH13590     |
| KS_341 | 1226 | SPV_cluster_276 | 70.588 | 408 | 0         |      | Beta-ketoacyl-[acyl-carrier-protein] synthase II [Chloroflexi bacterium]                     | RLT28345     |
| KS_345 | 1154 | SPV_cluster_290 | 59.791 | 383 | 1.03E-161 |      | Beta-ketoacyl synthase [Acidimicrobiaceae bacterium TMED77]                                  | OUV00831     |

|        |      |                 |        |     |           |      |                                                                                                |              |
|--------|------|-----------------|--------|-----|-----------|------|------------------------------------------------------------------------------------------------|--------------|
| KS_349 | 1247 | SPV_cluster_205 | 73.913 | 414 | 0         |      | 3-Oxoacyl-[acyl-carrier-protein] synthase 2 [Alphaproteobacteria bacterium MarineAlpha10_Bin2] | PPR24356     |
| KS_350 | 1292 | SPV_cluster_300 | 73.893 | 429 | 0         | SwfA | Type I polyketide synthase [bacterium symbiont of Plakortis simplex pPSA11D7]                  | AGH13590     |
| KS_351 | 1148 | SPV_cluster_436 | 74.084 | 382 | 0         |      | 3-Oxoacyl-[acyl-carrier-protein] synthase 2 [Alphaproteobacteria bacterium MarineAlpha10_Bin1] | PPR27313     |
| KS_353 | 1292 | SPV_cluster_108 | 76.566 | 431 | 0         | SwfA | Type I polyketide synthase [bacterium symbiont of Plakortis simplex pPSA11D7]                  | AGH13590     |
| KS_356 | 1292 | SPV_cluster_166 | 71.852 | 405 | 0         | SwfA | Type I polyketide synthase [bacterium symbiont of Plakortis simplex pPSA11D7]                  | AGH13590     |
| KS_357 | 1292 | SPV_cluster_281 | 77.049 | 427 | 0         | SwfA | Type I polyketide synthase [bacterium symbiont of Plakortis simplex pPSA11D7]                  | AGH13590     |
| KS_360 | 1232 | SPV_cluster_192 | 70.244 | 410 | 0         |      | Beta-ketoacyl-ACP synthase II [Rhodothermus marinus]                                           | WP_014068140 |
| KS_361 | 1292 | SPV_cluster_065 | 61.593 | 427 | 7.04E-175 | SwfA | Type I polyketide synthase [bacterium symbiont of Plakortis simplex pPSA11D7]                  | AGH13590     |
| KS_362 | 1220 | SPV_cluster_271 | 66.256 | 406 | 0         |      | Beta-ketoacyl-ACP synthase II [Opitutaceae bacterium EW11]                                     | WP_107743231 |
| KS_363 | 1220 | SPV_cluster_045 | 62.654 | 407 | 0         |      | Beta-ketoacyl-[acyl-carrier-protein] synthase II [Chloroflexi bacterium]                       | RMG78893     |
| KS_369 | 1229 | SPV_cluster_007 | 67.883 | 411 | 0         |      | Beta-ketoacyl-[acyl-carrier-protein] synthase II [Gemmatimonadetes bacterium]                  | RMH15744     |
| KS_370 | 1100 | SPV_cluster_112 | 52.381 | 252 | 7.01E-80  |      | Putative Beta-ketoacyl synthase [Sorangium cellulosum So ce56]                                 | CAN93510     |
| KS_371 | 1298 | SPV_cluster_141 | 78.089 | 429 | 0         | SwfA | Type I polyketide synthase [bacterium symbiont of Plakortis simplex pPSA11D7]                  | AGH13590     |
| KS_378 | 1223 | SPV_cluster_363 | 75.567 | 397 | 0         |      | Beta-ketoacyl-[acyl-carrier-protein] synthase II [Chloroflexi bacterium]                       | RLT35297     |
| KS_379 | 1253 | SPV_cluster_362 | 74.217 | 415 | 0         |      | 3-Oxoacyl-[acyl-carrier-protein] synthase 2 [Alphaproteobacteria bacterium MarineAlpha10_Bin2] | PPR24356     |
| KS_381 | 1229 | SPV_cluster_367 | 60.784 | 408 | 0         |      | Beta-ketoacyl-[acyl-carrier-protein] synthase II [Chloroflexi bacterium TMED70]                | OOU77203     |
| KS_383 | 1220 | SPV_cluster_027 | 76.733 | 404 | 0         |      | Beta-ketoacyl-[acyl-carrier-protein] synthase II [Nitrospirae bacterium]                       | TAJ27615     |
| KS_385 | 1229 | SPV_cluster_341 | 69.343 | 411 | 0         |      | Beta-ketoacyl-[acyl-carrier-protein] synthase II [Gemmatimonadetes bacterium]                  | RMH15744     |
| KS_386 | 1232 | SPV_cluster_173 | 69.756 | 410 | 0         |      | Beta-ketoacyl-ACP synthase II [Rhodothermus marinus]                                           | WP_014068140 |
| KS_389 | 1247 | SPV_cluster_042 | 71.671 | 413 | 0         |      | Beta-ketoacyl-ACP synthase II [Rhodospirillaceae bacterium SYSU D60014]                        | WP_119459592 |
| KS_391 | 1154 | SPV_cluster_442 | 71.99  | 382 | 0         |      | Beta-ketoacyl-ACP synthase II [Chloroflexi bacterium G233]                                     | WP_098502948 |
| KS_394 | 1226 | SPV_cluster_053 | 59.459 | 407 | 1.95E-180 |      | Beta-ketoacyl-[acyl-carrier-protein] synthase II [Chloroflexi bacterium]                       | PZN55531     |
| KS_399 | 1286 | SPV_cluster_057 | 91.335 | 427 | 0         |      | Putative polyketide synthase [uncultured bacterium 2063G]                                      | ABB73286     |
| KS_401 | 1184 | SPV_cluster_125 | 60.204 | 392 | 2.63E-169 |      | Beta-ketoacyl-[acyl-carrier-protein] synthase family protein [Pseudovibrio ascidiaceicola]     | WP_109314797 |

|        |      |                 |        |     |           |      |                                                                                      |              |
|--------|------|-----------------|--------|-----|-----------|------|--------------------------------------------------------------------------------------|--------------|
| KS_402 | 1184 | SPV_cluster_092 | 63.52  | 392 | 3.79E-171 |      | Beta-ketoacyl-[acyl-carrier-protein] synthase family protein [Pelagimonas phthalica] | WP_099241574 |
| KS_404 | 1223 | SPV_cluster_275 | 76.413 | 407 | 0         |      | Beta-ketoacyl-[acyl-carrier-protein] synthase family protein [Chloroflexi bacterium] | RLT38592     |
| KS_405 | 1292 | SPV_cluster_049 | 88.038 | 418 | 0         | SwfA | Type I polyketide synthase [bacterium symbiont of Plakortis simplex pPS11G3]         | AGH13577     |
| KS_409 | 1292 | SPV_cluster_067 | 91.905 | 420 | 0         | SwfA | Type I polyketide synthase [bacterium symbiont of Plakortis simplex pPS11G3]         | AGH13577     |
| KS_415 | 1232 | SPV_cluster_308 | 61.481 | 405 | 2.38E-169 |      | 3-Oxoacyl-[acyl-carrier-protein] synthase II [Chloroflexi bacterium]                 | PZC48600     |
| KS_416 | 1286 | SPV_cluster_168 | 80.751 | 426 | 0         | SupA | SupA [uncultured marine bacterium 1k6]                                               | ACX49735     |
| KS_418 | 1088 | SPV_cluster_444 | 57.576 | 363 | 2.15E-151 |      | Beta-ketoacyl-ACP synthase II [Desulfuribacillus stibiiarsenatis]                    | WP_069701864 |
| KS_420 | 1286 | SPV_cluster_371 | 79.625 | 427 | 0         | SupA | SupA [Theonella swinhoei bacterial symbiont clone pSW1H8]                            | ABE03935     |
| KS_422 | 1286 | SPV_cluster_149 | 80.562 | 427 | 0         | SupA | SupA [Theonella swinhoei bacterial symbiont clone pSW1H8]                            | ABE03935     |
| KS_425 | 1232 | SPV_cluster_201 | 74.453 | 411 | 0         |      | Beta-ketoacyl-[acyl-carrier-protein] synthase II [Chloroflexi bacterium]             | RLT35348     |
| KS_426 | 1211 | SPV_cluster_339 | 76.19  | 399 | 0         |      | Beta-ketoacyl-ACP synthase II [Rhodospirillaceae bacterium SYSU D60014]              | WP_119459592 |
| KS_427 | 1175 | SPV_cluster_215 | 68.901 | 373 | 2.00E-171 |      | 3-Oxoacyl-[acyl-carrier-protein] synthase II [Chloroflexi bacterium]                 | PZC48599     |
| KS_432 | 1286 | SPV_cluster_146 | 82.904 | 427 | 0         |      | Putative polyketide synthase [uncultured bacterium 2063G]                            | ABB73286     |
| KS_433 | 1175 | SPV_cluster_307 | 69.169 | 373 | 6.29E-171 |      | 3-Oxoacyl-[acyl-carrier-protein] synthase II [Chloroflexi bacterium]                 | PZC48599     |
| KS_434 | 1223 | SPV_cluster_340 | 66.256 | 406 | 0         |      | 3-Oxoacyl-[acyl-carrier-protein] synthase II [Chloroflexi bacterium]                 | PZC46532     |
| KS_435 | 1094 | SPV_cluster_345 | 33.636 | 330 | 5.31E-47  |      | Hypothetical protein [Pseudobacteriovorax antilogorgiicola]                          | WP_132314814 |
| KS_436 | 1232 | SPV_cluster_216 | 60.247 | 405 | 2.08E-167 |      | 3-Oxoacyl-[acyl-carrier-protein] synthase II [Chloroflexi bacterium]                 | PZC48600     |
| KS_438 | 1223 | SPV_cluster_301 | 66.502 | 406 | 0         |      | 3-Oxoacyl-[acyl-carrier-protein] synthase II [Chloroflexi bacterium]                 | PZC46532     |
| KS_441 | 1046 | SPV_cluster_443 | 69.164 | 347 | 1.37E-157 |      | 3-Oxoacyl-[acyl-carrier-protein] synthase II [Chloroflexi bacterium]                 | PZC48599     |
| KS_442 | 1175 | SPV_cluster_152 | 68.633 | 373 | 1.23E-170 |      | 3-Oxoacyl-[acyl-carrier-protein] synthase II [Chloroflexi bacterium]                 | PZC48599     |
| KS_443 | 1175 | SPV_cluster_414 | 83.014 | 365 | 0         |      | 3-Oxoacyl-[acyl-carrier-protein] synthase II [Chloroflexi bacterium]                 | PZC48599     |
| KS_444 | 1235 | SPV_cluster_083 | 68.613 | 411 | 0         |      | Beta-ketoacyl-[acyl-carrier-protein] synthase II [Gemmatimonadetes bacterium]        | RMH15744     |
| KS_445 | 1286 | SPV_cluster_071 | 80.328 | 427 | 0         | SupA | SupA [Theonella swinhoei bacterial symbiont clone pSW1H8]                            | ABE03935     |
| KS_450 | 1292 | SPV_cluster_412 | 93.78  | 418 | 0         | SwfA | Type I polyketide synthase [bacterium symbiont of Plakortis simplex pPS11G3]         | AGH13577     |
| KS_451 | 1289 | SPV_cluster_114 | 87.119 | 427 | 0         | SupA | SupA [Theonella swinhoei bacterial symbiont clone pSW1H8]                            | ABE03935     |



|        |      |                 |        |     |           |      |                                                                               |              |
|--------|------|-----------------|--------|-----|-----------|------|-------------------------------------------------------------------------------|--------------|
| KS_456 | 1184 | SPV_cluster_263 | 72.237 | 389 | 0         |      | 3-Oxoacyl-ACP synthase [Candidatus Tenderia electrophaga]                     | ALP54806     |
| KS_457 | 1286 | SPV_cluster_047 | 67.529 | 425 | 0         | SupA | SupA [Aplysina aerophoba bacterial symbiont clone pAPKS18]                    | ABE03915     |
| KS_458 | 1145 | SPV_cluster_236 | 56.349 | 378 | 9.66E-133 |      | Beta-ketoacyl-[acyl-carrier-protein] synthase family protein [Lysobacter sp.] | TBR14181     |
| KS_463 | 1190 | SPV_cluster_066 | 69.424 | 399 | 0         |      | Beta-ketoacyl-ACP synthase II [Pararhodobacter aggregans]                     | WP_107749575 |
| KS_464 | 1178 | SPV_cluster_069 | 67.519 | 391 | 0         |      | Beta-ketoacyl-ACP synthase II [Bryobacter aggregatus]                         | WP_031496688 |
| KS_467 | 1196 | SPV_cluster_364 | 54.839 | 403 | 2.73E-147 |      | Beta-ketoacyl-ACP synthase II [Pseudobacteriovorax antillogorgiicola]         | WP_132326354 |
| KS_470 | 977  | SPV_cluster_330 | 92.26  | 323 | 0         |      | Beta-ketoacyl-ACP synthase II [Rhodospirillaceae bacterium Spongia-Bin9]      | WP_108792873 |
| KS_472 | 1211 | SPV_cluster_259 | 74.121 | 398 | 0         |      | Beta-ketoacyl-ACP synthase II [Telmatospirillum siberiense]                   | WP_101252614 |
| KS_475 | 1154 | SPV_cluster_366 | 72.324 | 383 | 0         |      | Beta-ketoacyl-ACP synthase I [Thermopetrobacter sp. TC1]                      | WP_038035251 |
| KS_477 | 1286 | SPV_cluster_291 | 80.796 | 427 | 0         | SupA | SupA [Theonella swinhoei bacterial symbiont clone pSW1H8]                     | ABE03935     |
| KS_478 | 1142 | SPV_cluster_380 | 49.296 | 213 | 1.09E-62  |      | 3-Oxoacyl-[acyl-carrier-protein] synthase II [Chloroflexi bacterium]          | PZC49279     |
| KS_480 | 1199 | SPV_cluster_334 | 79.188 | 394 | 0         |      | Beta-ketoacyl-ACP synthase II [Rhodospirillaceae bacterium SYSU D60014]       | WP_119459592 |
| KS_482 | 1172 | SPV_cluster_182 | 65.553 | 389 | 1.66E-180 |      | 3-Oxoacyl-[acyl-carrier-protein] synthase II [Chloroflexi bacterium]          | PZC47099     |
| KS_485 | 1298 | SPV_cluster_226 | 64.884 | 430 | 1.25E-177 | SupA | SupA [Theonella swinhoei bacterial symbiont clone pSW1H8]                     | ABE03935     |
| KS_487 | 1112 | SPV_cluster_179 | 74.857 | 350 | 0         |      | Beta-ketoacyl synthase [Acidimicrobiales bacterium MED-G01]                   | PDH69975     |
| KS_489 | 1292 | SPV_cluster_220 | 77.986 | 427 | 0         | SwfA | Type I polyketide synthase [bacterium symbiont of Plakortis simplex pPSA11D7] | AGH13590     |
| KS_492 | 1172 | SPV_cluster_240 | 69.251 | 387 | 0         |      | 3-Oxoacyl-[acyl-carrier-protein] synthase 2 [bacterium HR29]                  | GBD22791     |
| KS_493 | 1286 | SPV_cluster_134 | 82.436 | 427 | 0         | SupA | SupA [Theonella swinhoei bacterial symbiont clone pSW1H8]                     | ABE03935     |
| KS_496 | 1166 | SPV_cluster_274 | 65.81  | 389 | 0         |      | 3-Oxoacyl-[acyl-carrier-protein] synthase II [Chloroflexi bacterium]          | PZC47099     |
| KS_500 | 1286 | SPV_cluster_278 | 70.023 | 427 | 0         | SupA | SupA [Aplysina aerophoba bacterial symbiont clone pAPKS18]                    | ABE03915     |
| KS_502 | 1286 | SPV_cluster_213 | 78.454 | 427 | 0         | SupA | SupA [Theonella swinhoei bacterial symbiont clone pSW1H8]                     | ABE03935     |
| KS_509 | 1292 | SPV_cluster_154 | 85.948 | 427 | 0         |      | Putative polyketide synthase [uncultured bacterium 2063G]                     | ABB73286     |
| KS_510 | 1292 | SPV_cluster_020 | 85.714 | 427 | 0         |      | Putative polyketide synthase [uncultured bacterium 2063G]                     | ABB73286     |
| KS_512 | 1292 | SPV_cluster_264 | 87.857 | 420 | 0         | SwfA | Type I polyketide synthase [bacterium symbiont of Plakortis simplex pPS11G3]  | AGH13577     |
| KS_513 | 1160 | SPV_cluster_316 | 65.195 | 385 | 1.49E-176 |      | 3-Oxoacyl-[acyl-carrier-protein] synthase II [Chloroflexi bacterium]          | PZC47099     |
| KS_515 | 1244 | SPV_cluster_029 | 72.104 | 423 | 0         |      | SA1_PKSA [uncultured bacterial symbiont of Discodermia dissoluta]             | AAAY00025    |
| KS_522 | 1229 | SPV_cluster_433 | 66.829 | 410 | 0         |      | Beta-ketoacyl-[acyl-carrier-protein] synthase II [Gemmatimonadetes bacterium] | RMH15744     |

|        |      |                 |        |     |           |      |                                                                                                |              |
|--------|------|-----------------|--------|-----|-----------|------|------------------------------------------------------------------------------------------------|--------------|
| KS_523 | 1283 | SPV_cluster_208 | 87.089 | 426 | 0         | SupA | SupA [Aplysina aerophoba bacterial symbiont clone pAPKS18]                                     | ABE03915     |
| KS_524 | 1286 | SPV_cluster_051 | 80.562 | 427 | 0         |      | Putative polyketide synthase [uncultured bacterium 2063G]                                      | ABB73286     |
| KS_530 | 1292 | SPV_cluster_174 | 82.904 | 427 | 0         | SupA | SupA [Theonella swinhoei bacterial symbiont clone pSW1H8]                                      | ABE03935     |
| KS_531 | 1058 | SPV_cluster_337 | 93.023 | 258 | 3.14E-168 |      | Beta-ketoacyl-ACP synthase [Rhodospirillaceae bacterium Spongia-Bin9]                          | WP_108793187 |
| KS_533 | 1292 | SPV_cluster_368 | 77.049 | 427 | 0         | SwfA | Type I polyketide synthase [bacterium symbiont of Plakortis simplex pPSA11D7]                  | AGH13590     |
| KS_534 | 1286 | SPV_cluster_326 | 80.986 | 426 | 0         | SupA | SupA [Aplysina aerophoba bacterial symbiont clone pAPKS18]                                     | ABE03915     |
| KS_535 | 1286 | SPV_cluster_269 | 79.391 | 427 | 0         | SupA | SupA [Theonella swinhoei bacterial symbiont clone pSW1H8]                                      | ABE03935     |
| KS_539 | 1286 | SPV_cluster_102 | 88.263 | 426 | 0         | SupA | Polyketide synthase, partial [Aplysina aerophoba bacterial symbiont clone pAE27P20]            | ABE03895     |
| KS_542 | 1286 | SPV_cluster_299 | 81.733 | 427 | 0         |      | Putative polyketide synthase [uncultured bacterium 2063G]                                      | ABB73286     |
| KS_544 | 1286 | SPV_cluster_078 | 66.042 | 427 | 2.45E-178 |      | SA1_PKSA [uncultured bacterial symbiont of Discodermia dissoluta]                              | AAAY00025    |
| KS_547 | 1292 | SPV_cluster_008 | 80.094 | 427 | 0         | SupA | SupA [Theonella swinhoei bacterial symbiont clone pSW1H8]                                      | ABE03935     |
| KS_552 | 1277 | SPV_cluster_169 | 74.533 | 428 | 0         |      | SA1_PKSA [uncultured bacterial symbiont of Discodermia dissoluta]                              | AAAY00025    |
| KS_556 | 1286 | SPV_cluster_212 | 82.201 | 427 | 0         | SupA | SupA [Theonella swinhoei bacterial symbiont clone pSW1H8]                                      | ABE03935     |
| KS_560 | 1283 | SPV_cluster_082 | 77.934 | 426 | 0         | SupA | SupA [uncultured marine bacterium 1k6]                                                         | ACX49735     |
| KS_561 | 1250 | SPV_cluster_221 | 70.29  | 414 | 1.36E-178 |      | SA1_PKSA [uncultured bacterial symbiont of Discodermia dissoluta]                              | AAAY00025    |
| KS_562 | 1292 | SPV_cluster_151 | 87.119 | 427 | 0         | SupA | SupA [Theonella swinhoei bacterial symbiont clone pSW1H8]                                      | ABE03935     |
| KS_565 | 1259 | SPV_cluster_030 | 75.234 | 428 | 0         |      | SA1_PKSA [uncultured bacterial symbiont of Discodermia dissoluta]                              | AAAY00025    |
| KS_566 | 1286 | SPV_cluster_311 | 79.859 | 427 | 0         | SupA | SupA [Theonella swinhoei bacterial symbiont clone pSW1H8]                                      | ABE03935     |
| KS_567 | 1301 | SPV_cluster_246 | 74.766 | 428 | 0         | SupA | SupA [Aplysina aerophoba bacterial symbiont clone pAPKS18]                                     | ABE03915     |
| KS_568 | 1166 | SPV_cluster_250 | 62.029 | 345 | 1.21E-154 |      | Beta-ketoacyl-[acyl-carrier-protein] synthase family protein [Verrucomicrobia bacterium]       | RME70472     |
| KS_571 | 1082 | SPV_cluster_376 | 61.176 | 340 | 2.44E-145 |      | Beta-ketoacyl-ACP synthase I [Deltaproteobacteria bacterium]                                   | RLB53742     |
| KS_574 | 1292 | SPV_cluster_052 | 86.651 | 427 | 0         |      | Putative polyketide synthase [uncultured bacterium 2063G]                                      | ABB73286     |
| KS_578 | 1178 | SPV_cluster_094 | 61.675 | 394 | 3.52E-156 |      | Beta-ketoacyl-[acyl-carrier-protein] synthase family protein [Verminephrobacter aporrectodeae] | WP_081479930 |
| KS_582 | 1010 | SPV_cluster_137 | 55.67  | 194 | 3.63E-63  |      | Beta-ketoacyl-ACP synthase [Xanthomonadaceae bacterium]                                        | RYD16404     |
| KS_584 | 1025 | SPV_cluster_136 | 67.213 | 244 | 1.60E-108 |      | Beta-ketoacyl-[acyl-carrier-protein] synthase family protein [Parasulfuritortus cantonensis]   | WP_131445552 |
| KS_587 | 1184 | SPV_cluster_123 | 59.836 | 366 | 3.15E-136 |      | Beta-ketoacyl-[acyl-carrier-protein] synthase family protein [Verminephrobacter aporrectodeae] | WP_081479930 |
| KS_589 | 1259 | SPV_cluster_338 | 72.249 | 418 | 0         | SupA | SupA [Theonella swinhoei bacterial symbiont clone pSW1H8]                                      | ABE03935     |

|        |      |                 |        |     |           |      |                                                                                     |           |
|--------|------|-----------------|--------|-----|-----------|------|-------------------------------------------------------------------------------------|-----------|
| KS_592 | 1277 | SPV_cluster_106 | 74.941 | 423 | 0         |      | SA1_PKSA [uncultured bacterial symbiont of Discodermia dissoluta]                   | AAAY00025 |
| KS_594 | 293  | SPV_cluster_111 | 66.667 | 93  | 7.36E-33  | SupA | SupA [Aplysina aerophoba bacterial symbiont clone pAPKS18]                          | ABE03915  |
| KS_595 | 1259 | SPV_cluster_357 | 68.182 | 418 | 1.73E-179 | SupA | SupA [Theonella swinhoei bacterial symbiont clone pSW1H8]                           | ABE03935  |
| KS_597 | 1256 | SPV_cluster_309 | 74.641 | 418 | 0         | SupA | SupA [Theonella swinhoei bacterial symbiont clone pSW1H8]                           | ABE03935  |
| KS_598 | 1259 | SPV_cluster_394 | 83.453 | 417 | 0         | SupA | SupA [Aplysina aerophoba bacterial symbiont clone pAPKS18]                          | ABE03915  |
| KS_600 | 1079 | SPV_cluster_145 | 65.138 | 327 | 7.89E-143 |      | Beta-ketoacyl synthase [Gammaproteobacteria bacterium]                              | TDJ41416  |
| KS_601 | 992  | SPV_cluster_261 | 62.963 | 243 | 2.24E-102 |      | Beta-ketoacyl synthase [Proteobacteria bacterium]                                   | PZM93747  |
| KS_604 | 851  | SPV_cluster_016 | 72.587 | 259 | 1.25E-129 |      | Beta-ketoacyl synthase [Acidobacteria bacterium]                                    | PYQ67687  |
| KS_606 | 653  | SPV_cluster_348 | 78.605 | 215 | 2.84E-108 |      | Putative polyketide synthase [uncultured bacterium 2063G]                           | ABB73286  |
| KS_610 | 287  | SPV_cluster_459 | 84.783 | 92  | 1.63E-46  | SupA | SupA [Aplysina aerophoba bacterial symbiont clone pAPKS18]                          | ABE03915  |
| KS_612 | 1256 | SPV_cluster_106 | 75.117 | 426 | 0         |      | SA1_PKSA [uncultured bacterial symbiont of Discodermia dissoluta]                   | AAAY00025 |
| KS_622 | 1259 | SPV_cluster_315 | 59.809 | 418 | 2.39E-159 | SupA | SupA [Theonella swinhoei bacterial symbiont clone pSW1H8]                           | ABE03935  |
| KS_623 | 1259 | SPV_cluster_305 | 85.372 | 417 | 0         | SupA | SupA [Aplysina aerophoba bacterial symbiont clone pAPKS18]                          | ABE03915  |
| KS_624 | 1259 | SPV_cluster_266 | 71.053 | 418 | 0         | SupA | SupA [Theonella swinhoei bacterial symbiont clone pSW1H8]                           | ABE03935  |
| KS_629 | 1259 | SPV_cluster_314 | 80.096 | 417 | 0         |      | Putative polyketide synthase [uncultured bacterium 2063G]                           | ABB73286  |
| KS_631 | 1235 | SPV_cluster_377 | 72.464 | 414 | 0         |      | SA1_PKSA [uncultured bacterial symbiont of Discodermia dissoluta]                   | AAAY00025 |
| KS_632 | 1259 | SPV_cluster_167 | 73.986 | 419 | 0         | SupA | Polyketide synthase, partial [Aplysina aerophoba bacterial symbiont clone pAE27P20] | ABE03895  |
| KS_634 | 1265 | SPV_cluster_030 | 75.177 | 423 | 0         |      | SA1_PKSA [uncultured bacterial symbiont of Discodermia dissoluta]                   | AAAY00025 |
| KS_635 | 1262 | SPV_cluster_030 | 76.123 | 423 | 0         |      | SA1_PKSA [uncultured bacterial symbiont of Discodermia dissoluta]                   | AAAY00025 |
| KS_639 | 1259 | SPV_cluster_260 | 74.82  | 417 | 0         | SupA | SupA [Aplysina aerophoba bacterial symbiont clone pAPKS18]                          | ABE03915  |
| KS_641 | 1259 | SPV_cluster_052 | 71.223 | 417 | 0         |      | SupA [Aplysina aerophoba bacterial symbiont clone pAPKS18]                          | ABE03915  |
| KS_648 | 1265 | SPV_cluster_211 | 79.616 | 417 | 0         |      | Putative polyketide synthase [uncultured bacterium 2063G]                           | ABB73286  |
| KS_651 | 1256 | SPV_cluster_227 | 68.66  | 418 | 0         | SupA | SupA [Theonella swinhoei bacterial symbiont clone pSW1H8]                           | ABE03935  |
| KS_653 | 1259 | SPV_cluster_306 | 76.259 | 417 | 0         | SupA | SupA [Aplysina aerophoba bacterial symbiont clone pAPKS18]                          | ABE03915  |
| KS_656 | 1244 | SPV_cluster_237 | 66.118 | 425 | 2.01E-175 |      | SA1_PKSA [uncultured bacterial symbiont of Discodermia dissoluta]                   | AAAY00025 |
| KS_658 | 1259 | SPV_cluster_030 | 75.65  | 423 | 0         |      | SA1_PKSA [uncultured bacterial symbiont of Discodermia dissoluta]                   | AAAY00025 |
| KS_663 | 1259 | SPV_cluster_206 | 69.305 | 417 | 0         | SupA | SupA [Aplysina aerophoba bacterial symbiont clone pAPKS18]                          | ABE03915  |
| KS_665 | 1259 | SPV_cluster_210 | 81.535 | 417 | 0         |      | Putative polyketide synthase [uncultured bacterium 2063G]                           | ABB73286  |

|        |      |                 |        |     |           |      |                                                                                     |           |
|--------|------|-----------------|--------|-----|-----------|------|-------------------------------------------------------------------------------------|-----------|
| KS_667 | 1259 | SPV_cluster_181 | 76.555 | 418 | 0         | SupA | SupA [Theonella swinhoei bacterial symbiont clone pSW1H8]                           | ABE03935  |
| KS_675 | 1268 | SPV_cluster_030 | 74.292 | 424 | 0         |      | SA1_PKSA [uncultured bacterial symbiont of Discodermia dissoluta]                   | AAAY00025 |
| KS_676 | 1259 | SPV_cluster_082 | 69.856 | 418 | 0         | SupA | SupA [Theonella swinhoei bacterial symbiont clone pSW1H8]                           | ABE03935  |
| KS_678 | 1253 | SPV_cluster_221 | 58.554 | 415 | 6.49E-145 |      | SA1_PKSA [uncultured bacterial symbiont of Discodermia dissoluta]                   | AAAY00025 |
| KS_680 | 1277 | SPV_cluster_030 | 73.995 | 423 | 0         |      | SA1_PKSA [uncultured bacterial symbiont of Discodermia dissoluta]                   | AAAY00025 |
| KS_684 | 1268 | SPV_cluster_030 | 74.704 | 423 | 0         |      | SA1_PKSA [uncultured bacterial symbiont of Discodermia dissoluta]                   | AAAY00025 |
| KS_686 | 1256 | SPV_cluster_191 | 69.378 | 418 | 0         |      | SupA [Theonella swinhoei bacterial symbiont clone pSW1H8]                           | ABE03935  |
| KS_687 | 1259 | SPV_cluster_051 | 68.106 | 417 | 0         |      | SupA [Aplysina aerophoba bacterial symbiont clone pAPKS18]                          | ABE03915  |
| KS_690 | 1259 | SPV_cluster_096 | 77.218 | 417 | 0         | SupA | SupA [Aplysina aerophoba bacterial symbiont clone pAPKS18]                          | ABE03915  |
| KS_694 | 1259 | SPV_cluster_057 | 95.204 | 417 | 0         |      | Putative polyketide synthase [uncultured bacterium 2063G]                           | ABB73286  |
| KS_696 | 1259 | SPV_cluster_171 | 80.096 | 417 | 0         |      | Putative polyketide synthase [uncultured bacterium 2063G]                           | ABB73286  |
| KS_698 | 1259 | SPV_cluster_040 | 73.445 | 418 | 0         | SupA | SupA [Theonella swinhoei bacterial symbiont clone pSW1H8]                           | ABE03935  |
| KS_699 | 1259 | SPV_cluster_214 | 73.684 | 418 | 0         | SupA | SupA [Theonella swinhoei bacterial symbiont clone pSW1H8]                           | ABE03935  |
| KS_702 | 1271 | SPV_cluster_029 | 74.232 | 423 | 0         |      | SA1_PKSA [uncultured bacterial symbiont of Discodermia dissoluta]                   | AAAY00025 |
| KS_703 | 1259 | SPV_cluster_134 | 72.249 | 418 | 0         | SupA | SupA [Theonella swinhoei bacterial symbiont clone pSW1H8]                           | ABE03935  |
| KS_706 | 1259 | SPV_cluster_035 | 66.986 | 418 | 0         | SupA | SupA [Theonella swinhoei bacterial symbiont clone pSW1H8]                           | ABE03935  |
| KS_709 | 1265 | SPV_cluster_071 | 68.66  | 418 | 0         | SupA | SupA [Theonella swinhoei bacterial symbiont clone pSW1H8]                           | ABE03935  |
| KS_710 | 1262 | SPV_cluster_114 | 83.014 | 418 | 0         | SupA | SupA [Theonella swinhoei bacterial symbiont clone pSW1H8]                           | ABE03935  |
| KS_711 | 1259 | SPV_cluster_084 | 67.386 | 417 | 0         | SupA | SupA [uncultured marine bacterium 1k6]                                              | ACX49735  |
| KS_713 | 1259 | SPV_cluster_146 | 80.815 | 417 | 0         |      | Putative polyketide synthase [uncultured bacterium 2063G]                           | ABB73286  |
| KS_716 | 1259 | SPV_cluster_020 | 69.065 | 417 | 0         |      | SupA [Aplysina aerophoba bacterial symbiont clone pAPKS18]                          | ABE03915  |
| KS_717 | 1265 | SPV_cluster_047 | 63.636 | 418 | 2.86E-173 | SupA | SupA [Theonella swinhoei bacterial symbiont clone pSW1H8]                           | ABE03935  |
| KS_718 | 1259 | SPV_cluster_154 | 72.488 | 418 | 0         |      | SupA [Theonella swinhoei bacterial symbiont clone pSW1H8]                           | ABE03935  |
| KS_721 | 1211 | SPV_cluster_149 | 75.062 | 405 | 0         | SupA | SupA [Theonella swinhoei bacterial symbiont clone pSW1H8]                           | ABE03935  |
| KS_722 | 1259 | SPV_cluster_245 | 72.01  | 418 | 0         | SupA | SupA [Theonella swinhoei bacterial symbiont clone pSW1H8]                           | ABE03935  |
| KS_725 | 1259 | SPV_cluster_150 | 73.684 | 418 | 0         | SupA | SupA [Theonella swinhoei bacterial symbiont clone pSW1H8]                           | ABE03935  |
| KS_731 | 1262 | SPV_cluster_151 | 74.224 | 419 | 0         | SupA | Polyketide synthase, partial [Aplysina aerophoba bacterial symbiont clone pAE27P20] | ABE03895  |
| KS_734 | 1259 | SPV_cluster_174 | 70.264 | 417 | 0         | SupA | SupA [Aplysina aerophoba bacterial symbiont clone pAPKS18]                          | ABE03915  |
| KS_736 | 1259 | SPV_cluster_005 | 74.163 | 418 | 0         | SupA | SupA [Theonella swinhoei bacterial symbiont clone pSW1H8]                           | ABE03935  |

|        |      |                 |        |     |           |      |                                                                                     |           |
|--------|------|-----------------|--------|-----|-----------|------|-------------------------------------------------------------------------------------|-----------|
| KS_737 | 1277 | SPV_cluster_169 | 76.359 | 423 | 0         |      | SA1_PKSA [uncultured bacterial symbiont of Discodermia dissoluta]                   | AAAY00025 |
| KS_739 | 1259 | SPV_cluster_102 | 81.579 | 418 | 0         | SupA | Polyketide synthase, partial [Aplysina aerophoba bacterial symbiont clone pAE27P20] | ABE03895  |
| KS_740 | 1262 | SPV_cluster_246 | 70.167 | 419 | 0         | SupA | SupA [Theonella swinhoei bacterial symbiont clone pSW1H8]                           | ABE03935  |
| KS_742 | 1262 | SPV_cluster_115 | 67.225 | 418 | 0         | SupA | SupA [Theonella swinhoei bacterial symbiont clone pSW1H8]                           | ABE03935  |
| KS_743 | 1262 | SPV_cluster_241 | 66.746 | 418 | 0         | SupA | SupA [uncultured marine bacterium 1k6]                                              | ACX49735  |
| KS_745 | 1259 | SPV_cluster_078 | 72.01  | 418 | 0         |      | SupA [Theonella swinhoei bacterial symbiont clone pSW1H8]                           | ABE03935  |
| KS_748 | 1262 | SPV_cluster_168 | 68.66  | 418 | 0         | SupA | SupA [Theonella swinhoei bacterial symbiont clone pSW1H8]                           | ABE03935  |
| KS_750 | 1319 | SPV_cluster_008 | 64.76  | 437 | 2.71E-174 | SupA | SupA [Aplysina aerophoba bacterial symbiont clone pAPKS18]                          | ABE03915  |
| KS_752 | 176  | SPV_cluster_457 | 73.214 | 56  | 5.97E-22  |      | SA1_PKSB [uncultured bacterial symbiont of Discodermia dissoluta]                   | AAAY00026 |
| KS_753 | 1262 | SPV_cluster_030 | 75.887 | 423 | 0         |      | SA1_PKSA [uncultured bacterial symbiont of Discodermia dissoluta]                   | AAAY00025 |
| KS_756 | 1250 | SPV_cluster_030 | 72.471 | 425 | 0         |      | SA1_PKSA [uncultured bacterial symbiont of Discodermia dissoluta]                   | AAAY00025 |
| KS_760 | 1268 | SPV_cluster_029 | 74.468 | 423 | 0         |      | SA1_PKSA [uncultured bacterial symbiont of Discodermia dissoluta]                   | AAAY00025 |
| KS_762 | 1277 | SPV_cluster_106 | 67.376 | 423 | 0         |      | SA1_PKSA [uncultured bacterial symbiont of Discodermia dissoluta]                   | AAAY00025 |

Table S11. BLAST search of the KS sequences from the metagenome of *C. reinwardti* against the refseq\_protein database in NCBI

| KS ID  | Length (nt) | BGC ID          | Identity (%) | Alignment length (aa) | E-value   | The most homologous sequences                                                                  | Accession number |
|--------|-------------|-----------------|--------------|-----------------------|-----------|------------------------------------------------------------------------------------------------|------------------|
| KS_013 | 792         | CLR_cluster_248 | 61.154       | 260                   | 2.49E-100 | Type I polyketide synthase [Mycobacterium]                                                     | WP_024450282     |
| KS_029 | 1194        | CLR_cluster_183 | 54.39        | 410                   | 2.01E-125 | Type I polyketide synthase [Mycobacterium]                                                     | WP_024450282     |
| KS_030 | 792         | CLR_cluster_249 | 59.231       | 260                   | 9.27E-99  | Type I polyketide synthase [Mycobacterium aurum]                                               | WP_048632560     |
| KS_032 | 327         | CLR_cluster_265 | 81.31        | 110                   | 3.00E-21  | Type I polyketide synthase [Paenibacillus pinihi]                                              | WP_051237173     |
| KS_039 | 1269        | CLR_cluster_225 | 53.081       | 422                   | 4.33E-142 | Polyketide synthase [Stanieria cyanosphaera]                                                   | WP_015193130     |
| KS_041 | 975         | CLR_cluster_202 | 56.426       | 319                   | 1.62E-105 | Type I polyketide synthase [Mycobacterium asiaticum]                                           | WP_065157110     |
| KS_044 | 363         | CLR_cluster_181 | 63.025       | 119                   | 1.74E-44  | Type I polyketide synthase [Mycobacterium malmoeense]                                          | WP_065480691     |
| KS_061 | 1113        | CLR_cluster_192 | 57.453       | 369                   | 1.20E-129 | Type I polyketide synthase [Mycobacterium sp. 852002-30065 SCH5024008]                         | WP_067203355     |
| KS_064 | 1221        | CLR_cluster_021 | 60.68        | 412                   | 6.30E-146 | Type I polyketide synthase [Mycobacterium avium]                                               | WP_095785889     |
| KS_066 | 702         | CLR_cluster_246 | 63.203       | 231                   | 3.07E-90  | Type I polyketide synthase [Mycobacterium asiaticum]                                           | WP_065157110     |
| KS_073 | 1112        | CLR_cluster_222 | 57.027       | 370                   | 1.64E-128 | Type I polyketide synthase [Mycobacterium sp. 852002-30065 SCH5024008]                         | WP_067203355     |
| KS_078 | 1064        | CLR_cluster_252 | 75.714       | 350                   | 0         | Beta-ketoacyl-[acyl-carrier-protein] synthase II [Telmatospirillum siberiense]                 | WP_101252614     |
| KS_079 | 713         | CLR_cluster_062 | 48.182       | 220                   | 8.63E-55  | Type I polyketide synthase [Chondromyces crocatus]                                             | WP_063796357     |
| KS_084 | 977         | CLR_cluster_279 | 38.806       | 201                   | 3.36E-29  | Beta-ketoacyl-[acyl-carrier-protein] synthase family protein [Streptomyces atratus]            | WP_072488766     |
| KS_095 | 1049        | CLR_cluster_281 | 64.571       | 350                   | 4.18E-161 | Beta-ketoacyl-[acyl-carrier-protein] synthase II [Halomonas elongata]                          | WP_013331756     |
| KS_101 | 1100        | CLR_cluster_081 | 44.048       | 252                   | 2.58E-59  | Beta-ketoacyl-[acyl-carrier-protein] synthase family protein [Acidobacteria bacterium KBS 146] | WP_026387381     |
| KS_102 | 1097        | CLR_cluster_105 | 43.529       | 340                   | 3.24E-77  | Hypothetical protein [Sandaracinus amylolyticus]                                               | WP_053231614     |
| KS_105 | 1223        | CLR_cluster_122 | 58.824       | 408                   | 3.39E-179 | Beta-ketoacyl-[acyl-carrier-protein] synthase II [Risunbinella massiliensis]                   | WP_044642594     |
| KS_106 | 1223        | CLR_cluster_041 | 60.197       | 407                   | 3.85E-180 | Beta-ketoacyl-[acyl-carrier-protein] synthase II [Brevibacillus borstelensis]                  | WP_003386033     |
| KS_111 | 1223        | CLR_cluster_006 | 82.02        | 406                   | 0         | Beta-ketoacyl-[acyl-carrier-protein] synthase II [Thioalkalivibrio sp. HK1]                    | WP_038098656     |
| KS_115 | 1223        | CLR_cluster_007 | 59.705       | 407                   | 2.56E-177 | Beta-ketoacyl-[acyl-carrier-protein] synthase II [Clostridiisalibacter paucivorans]            | WP_026893881     |
| KS_116 | 1202        | CLR_cluster_110 | 71.859       | 398                   | 0         | Beta-ketoacyl-ACP synthase I [Salinicola sp. MIT1003]                                          | WP_071230737     |
| KS_117 | 1250        | CLR_cluster_086 | 73.366       | 413                   | 0         | Beta-ketoacyl-[acyl-carrier-protein] synthase II [Rhodospirillales bacterium URHD0088]         | WP_027300572     |
| KS_120 | 1226        | CLR_cluster_193 | 58.333       | 408                   | 6.75E-169 | Beta-ketoacyl-[acyl-carrier-protein] synthase II [Thermoflexus hugenholtzii]                   | WP_098504503     |

|        |      |                 |        |     |           |                                                                                              |              |
|--------|------|-----------------|--------|-----|-----------|----------------------------------------------------------------------------------------------|--------------|
| KS_126 | 1184 | CLR_cluster_230 | 75.949 | 395 | 0         | Beta-ketoacyl-ACP synthase I [Methylarcula marina]                                           | WP_106692425 |
| KS_134 | 1199 | CLR_cluster_253 | 67.506 | 397 | 0         | Beta-ketoacyl-[acyl-carrier-protein] synthase family protein [Halocynthiaibacter namhaensis] | WP_039018003 |
| KS_138 | 1223 | CLR_cluster_097 | 59.705 | 407 | 1.90E-180 | Beta-ketoacyl-[acyl-carrier-protein] synthase II [Risunbinella massiliensis]                 | WP_044642594 |
| KS_142 | 1208 | CLR_cluster_126 | 75     | 400 | 0         | Beta-ketoacyl-ACP synthase I [Inquilinus limosus]                                            | WP_026872496 |
| KS_146 | 1223 | CLR_cluster_082 | 74.138 | 406 | 0         | Beta-ketoacyl-[acyl-carrier-protein] synthase II [Thioalkalivibrio sp. HK1]                  | WP_038098656 |
| KS_150 | 1196 | CLR_cluster_127 | 68.09  | 398 | 0         | Beta-ketoacyl-ACP synthase I [Halomonas sp. HL-48]                                           | WP_027337473 |
| KS_154 | 1223 | CLR_cluster_013 | 64.039 | 406 | 0         | Beta-ketoacyl-[acyl-carrier-protein] synthase II [Moorella humiferrea]                       | WP_106006374 |
| KS_159 | 1223 | CLR_cluster_101 | 66.422 | 408 | 0         | Beta-ketoacyl-[acyl-carrier-protein] synthase II [Pyrinomonas methylaliphatogenes]           | WP_041976954 |
| KS_163 | 1229 | CLR_cluster_065 | 58.293 | 410 | 1.85E-168 | Beta-ketoacyl-[acyl-carrier-protein] synthase II [Desmospora sp. 8437]                       | WP_040387222 |
| KS_170 | 1217 | CLR_cluster_085 | 58.025 | 405 | 4.80E-177 | Beta-ketoacyl-[acyl-carrier-protein] synthase II [Bacillales]                                | WP_029100165 |
| KS_179 | 1202 | CLR_cluster_257 | 67.75  | 400 | 0         | Beta-ketoacyl-ACP synthase I [Methyloterricola oryzae]                                       | WP_045223829 |
| KS_183 | 1223 | CLR_cluster_165 | 57.248 | 407 | 3.69E-179 | Beta-ketoacyl-[acyl-carrier-protein] synthase II [Planifilum fimeticola]                     | WP_106344983 |
| KS_196 | 1280 | CLR_cluster_139 | 43.972 | 423 | 3.07E-119 | Hypothetical protein [Syntrophobacter sp. SbD1]                                              | WP_106821393 |
| KS_198 | 1223 | CLR_cluster_001 | 71.253 | 407 | 0         | Beta-ketoacyl-[acyl-carrier-protein] synthase II [Ectothiorhodospira haloalkaliphila]        | WP_025281708 |
| KS_199 | 1157 | CLR_cluster_264 | 54.45  | 382 | 4.06E-134 | Beta-ketoacyl-ACP synthase II [Ferrimicrobium acidiphilum]                                   | WP_052566261 |
| KS_201 | 1226 | CLR_cluster_022 | 61.52  | 408 | 9.13E-180 | Beta-ketoacyl-[acyl-carrier-protein] synthase II [Nitrosomonas europaea]                     | WP_011112207 |
| KS_204 | 1163 | CLR_cluster_064 | 62.304 | 382 | 1.50E-179 | Beta-ketoacyl-[acyl-carrier-protein] synthase II [Pseudomonas pachastrellae]                 | WP_083725910 |
| KS_206 | 1226 | CLR_cluster_143 | 61.916 | 407 | 0         | Beta-ketoacyl-[acyl-carrier-protein] synthase II [Pseudomonas pachastrellae]                 | WP_083725910 |
| KS_208 | 1223 | CLR_cluster_179 | 64.691 | 405 | 0         | Beta-ketoacyl-[acyl-carrier-protein] synthase II [Pyrinomonas methylaliphatogenes]           | WP_041976954 |
| KS_212 | 1217 | CLR_cluster_190 | 58.519 | 405 | 4.55E-177 | Beta-ketoacyl-[acyl-carrier-protein] synthase II [Bacillales]                                | WP_029100165 |
| KS_217 | 1217 | CLR_cluster_015 | 64.109 | 404 | 0         | Beta-ketoacyl-[acyl-carrier-protein] synthase II [Pseudomonas pachastrellae]                 | WP_083725910 |
| KS_221 | 1064 | CLR_cluster_102 | 69.057 | 265 | 2.37E-130 | Beta-ketoacyl-ACP synthase [Cupriavidus oxalaticus]                                          | WP_063237600 |
| KS_222 | 1229 | CLR_cluster_134 | 54.39  | 410 | 2.49E-144 | Beta-ketoacyl-[acyl-carrier-protein] synthase II [Alicyclobacillus macrosporangiiidus]       | WP_074950143 |
| KS_227 | 1217 | CLR_cluster_220 | 65.926 | 405 | 0         | Beta-ketoacyl-[acyl-carrier-protein] synthase II [Acidihalobacter ferrooxidans]              | WP_076837285 |
| KS_231 | 1217 | CLR_cluster_049 | 66.256 | 406 | 0         | Beta-ketoacyl-[acyl-carrier-protein] synthase II [Thioflavococcus mobilis]                   | WP_015281247 |
| KS_232 | 1223 | CLR_cluster_224 | 65.517 | 406 | 0         | Beta-ketoacyl-[acyl-carrier-protein] synthase II [Dyella]                                    | WP_026634449 |

|        |      |                 |        |     |           |                                                                                                   |              |
|--------|------|-----------------|--------|-----|-----------|---------------------------------------------------------------------------------------------------|--------------|
| KS_239 | 1226 | CLR_cluster_166 | 61.425 | 407 | 2.27E-179 | Beta-ketoacyl-[acyl-carrier-protein] synthase II [ <i>Pseudomonas abyssi</i> ]                    | WP_096004673 |
| KS_247 | 1223 | CLR_cluster_162 | 67.734 | 406 | 0         | Beta-ketoacyl-[acyl-carrier-protein] synthase II [ <i>Halomonas</i> sp. A11-A]                    | WP_110068027 |
| KS_250 | 1340 | CLR_cluster_014 | 52.954 | 457 | 4.05E-139 | Type I Polyketide synthase [ <i>Chondromyces crocatus</i> ]                                       | WP_082362498 |
| KS_253 | 1229 | CLR_cluster_228 | 56.829 | 410 | 1.52E-163 | Beta-ketoacyl-[acyl-carrier-protein] synthase II [ <i>Rhodothermus marinus</i> ]                  | WP_012845172 |
| KS_262 | 1220 | CLR_cluster_045 | 63.054 | 406 | 0         | Beta-ketoacyl-[acyl-carrier-protein] synthase II [ <i>Thermoanaerobaculum aquaticum</i> ]         | WP_038046901 |
| KS_263 | 1292 | CLR_cluster_076 | 44.749 | 438 | 4.91E-94  | Type I polyketide synthase [ <i>Sciscionella marina</i> ]                                         | WP_020497474 |
| KS_266 | 1151 | CLR_cluster_140 | 58.377 | 382 | 1.34E-141 | Beta-ketoacyl-ACP synthase II [ <i>Streptomyces</i> sp. NRRL F-2664]                              | WP_030765373 |
| KS_279 | 1229 | CLR_cluster_147 | 62.347 | 409 | 0         | Beta-ketoacyl-[acyl-carrier-protein] synthase II [ <i>Nitrosomonas aestuarii</i> ]                | WP_090702733 |
| KS_283 | 1286 | CLR_cluster_131 | 63.593 | 423 | 4.29E-180 | Type I polyketide synthase [ <i>Marinobacterium profundum</i> ]                                   | WP_067295857 |
| KS_284 | 1292 | CLR_cluster_108 | 41.136 | 440 | 4.86E-87  | Type I polyketide synthase [ <i>Crossiella equi</i> ]                                             | WP_086785133 |
| KS_294 | 1223 | CLR_cluster_060 | 65.517 | 406 | 0         | Beta-ketoacyl-[acyl-carrier-protein] synthase II [ <i>Geobacter</i> sp. DSM 2909]                 | WP_108103150 |
| KS_302 | 1154 | CLR_cluster_043 | 51.558 | 353 | 4.76E-110 | Hypothetical protein [ <i>Tropicibacter phthalicus</i> ]                                          | WP_099241578 |
| KS_309 | 1160 | CLR_cluster_114 | 60.807 | 347 | 1.90E-131 | Beta-ketoacyl-ACP synthase II [ <i>Streptomyces katrae</i> ]                                      | WP_045950542 |
| KS_311 | 1259 | CLR_cluster_137 | 60.143 | 419 | 6.11E-179 | Beta-ketoacyl-[acyl-carrier-protein] synthase family protein [ <i>Syntrophus aciditrophicus</i> ] | WP_011418884 |
| KS_314 | 1160 | CLR_cluster_214 | 61.96  | 347 | 3.94E-133 | Beta-ketoacyl-ACP synthase II [ <i>Streptomyces katrae</i> ]                                      | WP_045950542 |
| KS_322 | 1214 | CLR_cluster_098 | 55.941 | 404 | 9.82E-156 | Beta-ketoacyl-[acyl-carrier-protein] synthase II [ <i>Thermorudis peleae</i> ]                    | WP_038037697 |
| KS_325 | 1286 | CLR_cluster_056 | 53.333 | 435 | 2.05E-138 | Type I polyketide synthase, partial [ <i>Burkholderia vietnamiensis</i> ]                         | WP_059694304 |
| KS_327 | 1154 | CLR_cluster_009 | 53.786 | 383 | 2.20E-131 | Hypothetical protein [ <i>Tropicibacter phthalicus</i> ]                                          | WP_099241578 |
| KS_329 | 1160 | CLR_cluster_069 | 62.402 | 383 | 7.80E-149 | Beta-ketoacyl-ACP synthase II [ <i>Streptomyces katrae</i> ]                                      | WP_045950542 |
| KS_330 | 1223 | CLR_cluster_201 | 60.197 | 407 | 0         | Beta-ketoacyl-[acyl-carrier-protein] synthase II [ <i>Kroppenstedtia eburnea</i> ]                | WP_076523249 |
| KS_334 | 1229 | CLR_cluster_079 | 56.968 | 409 | 1.29E-157 | Beta-ketoacyl-[acyl-carrier-protein] synthase II [ <i>Desulfovibrio thermocuniculi</i> ]          | WP_027718279 |
| KS_338 | 1292 | CLR_cluster_133 | 41.609 | 435 | 1.97E-87  | Type I polyketide synthase [ <i>Streptomyces</i> ]                                                | WP_028443132 |
| KS_340 | 1154 | CLR_cluster_118 | 58.398 | 387 | 1.23E-128 | Beta-ketoacyl-ACP synthase II [ <i>Ilumatobacter nonamiensis</i> ]                                | WP_040493091 |
| KS_342 | 1292 | CLR_cluster_089 | 42.759 | 435 | 4.48E-89  | Type I polyketide synthase [ <i>Streptomyces</i> ]                                                | WP_028443132 |
| KS_346 | 1229 | CLR_cluster_096 | 56.098 | 410 | 7.70E-159 | Beta-ketoacyl-[acyl-carrier-protein] synthase II [ <i>Melghirimyces profundicolus</i> ]           | WP_108022554 |
| KS_354 | 1232 | CLR_cluster_231 | 70     | 410 | 0         | Beta-ketoacyl-[acyl-carrier-protein] synthase II [ <i>Rhodothermus marinus</i> ]                  | WP_014068140 |
| KS_358 | 1292 | CLR_cluster_055 | 39.066 | 407 | 6.07E-79  | Type I polyketide synthase [ <i>Stigmatella erecta</i> ]                                          | WP_093522399 |
| KS_364 | 1292 | CLR_cluster_027 | 39.723 | 433 | 5.71E-80  | Type I polyketide synthase [ <i>Burkholderia thailandensis</i> ]                                  | WP_038712449 |
| KS_366 | 1229 | CLR_cluster_025 | 58.435 | 409 | 2.77E-164 | Beta-ketoacyl-[acyl-carrier-protein] synthase II [ <i>Desulfovibrio thermocuniculi</i> ]          | WP_027718279 |



|        |      |                 |        |     |           |                                                                                           |              |
|--------|------|-----------------|--------|-----|-----------|-------------------------------------------------------------------------------------------|--------------|
| KS_368 | 1247 | CLR_cluster_204 | 71.981 | 414 | 0         | Beta-ketoacyl-[acyl-carrier-protein] synthase II [Tistrella mobilis]                      | WP_014745380 |
| KS_372 | 1298 | CLR_cluster_132 | 42.759 | 435 | 3.75E-87  | Type I polyketide synthase [Streptomyces]                                                 | WP_030626723 |
| KS_373 | 1220 | CLR_cluster_030 | 73.515 | 404 | 0         | Beta-ketoacyl-[acyl-carrier-protein] synthase II [Candidatus Nitrospira nitrosa]          | WP_090746581 |
| KS_375 | 1100 | CLR_cluster_032 | 48.221 | 253 | 1.18E-58  | 3-oxoacyl-ACP synthase [Lechevalieria fradiae]                                            | WP_090045424 |
| KS_376 | 1007 | CLR_cluster_275 | 54.192 | 334 | 8.45E-119 | Beta-ketoacyl-[acyl-carrier-protein] synthase II [Thermaerobacter marianensis]            | WP_013495369 |
| KS_382 | 1292 | CLR_cluster_087 | 42.069 | 435 | 4.46E-85  | Type I polyketide synthase, partial [Streptomyces sp. SM5]                                | WP_103492552 |
| KS_384 | 1220 | CLR_cluster_261 | 52.826 | 407 | 3.49E-158 | Beta-ketoacyl-[acyl-carrier-protein] synthase II [Bacillus methanolicus]                  | WP_004433597 |
| KS_393 | 1247 | CLR_cluster_200 | 70.944 | 413 | 0         | Beta-ketoacyl-[acyl-carrier-protein] synthase II [Magnetospira sp. QH-2]                  | WP_046021768 |
| KS_395 | 995  | CLR_cluster_262 | 70.517 | 329 | 4.29E-166 | Beta-ketoacyl-[acyl-carrier-protein] synthase II [Tistlia consotensis]                    | WP_085125958 |
| KS_403 | 1286 | CLR_cluster_135 | 56.744 | 430 | 2.81E-139 | Type I polyketide synthase [Mycolicibacterium austroafricanum]                            | WP_105389463 |
| KS_407 | 1184 | CLR_cluster_010 | 63.265 | 392 | 5.45E-171 | Beta-ketoacyl-[acyl-carrier-protein] synthase family protein [Tropicibacter phthalicus]   | WP_099241574 |
| KS_412 | 1223 | CLR_cluster_191 | 58.088 | 408 | 3.16E-168 | Beta-ketoacyl-[acyl-carrier-protein] synthase II [Thermoflexus hugenholtzii]              | WP_098502948 |
| KS_413 | 1184 | CLR_cluster_042 | 62.5   | 392 | 4.71E-169 | Beta-ketoacyl-[acyl-carrier-protein] synthase family protein [Tropicibacter phthalicus]   | WP_099241574 |
| KS_414 | 1292 | CLR_cluster_106 | 43.333 | 450 | 2.20E-93  | Type I polyketide synthase [Sciscionella marina]                                          | WP_020497474 |
| KS_417 | 965  | CLR_cluster_251 | 54.545 | 319 | 6.35E-117 | Beta-ketoacyl-[acyl-carrier-protein] synthase II [Thermorudis peleae]                     | WP_038037697 |
| KS_419 | 1286 | CLR_cluster_212 | 59.207 | 429 | 2.35E-148 | Type I polyketide synthase [Mycolicibacterium austroafricanum]                            | WP_105389463 |
| KS_421 | 710  | CLR_cluster_278 | 57.384 | 237 | 5.78E-85  | Type I polyketide synthase [Moorea producens]                                             | WP_071104824 |
| KS_423 | 1064 | CLR_cluster_218 | 63.636 | 352 | 1.60E-132 | Hybrid non-ribosomal peptide synthetase/Type I polyketide synthase [Methylosinus sp. LW4] | WP_026191724 |
| KS_424 | 1211 | CLR_cluster_104 | 73.367 | 398 | 0         | Beta-ketoacyl-[acyl-carrier-protein] synthase II [Rhodospirillales bacterium URHD0088]    | WP_027300572 |
| KS_428 | 1292 | CLR_cluster_053 | 40.367 | 436 | 3.69E-87  | Type I polyketide synthase [Sciscionella marina]                                          | WP_020497474 |
| KS_431 | 1235 | CLR_cluster_184 | 57.664 | 411 | 1.35E-171 | Beta-ketoacyl-[acyl-carrier-protein] synthase II [Desmospora sp. 8437]                    | WP_040387222 |
| KS_440 | 1286 | CLR_cluster_219 | 54.861 | 432 | 3.55E-141 | Type I polyketide synthase, partial [Burkholderia vietnamiensis]                          | WP_059895285 |
| KS_447 | 1292 | CLR_cluster_177 | 40.138 | 436 | 4.26E-89  | SDR family NAD(P)-dependent oxidoreductase [Leucothrix sp. IMCC9719]                      | WP_109824032 |
| KS_454 | 1184 | CLR_cluster_121 | 73.846 | 390 | 0         | Beta-ketoacyl-[acyl-carrier-protein] synthase II [Thioalkalivibrio sp. HK1]               | WP_038098656 |
| KS_455 | 1286 | CLR_cluster_203 | 53.828 | 431 | 2.74E-130 | Type I polyketide synthase, partial [Mycobacterium parascrofulaceum]                      | WP_007169537 |
| KS_461 | 1211 | CLR_cluster_145 | 74.121 | 398 | 0         | Beta-ketoacyl-[acyl-carrier-protein] synthase II [Telmatospirillum siberiense]            | WP_101252614 |
| KS_465 | 983  | CLR_cluster_141 | 67.485 | 326 | 2.10E-159 | Beta-ketoacyl-[acyl-carrier-protein] synthase II [Bryobacter aggregatus]                  | WP_031496688 |
| KS_466 | 1190 | CLR_cluster_128 | 69.424 | 399 | 0         | Beta-ketoacyl-[acyl-carrier-protein] synthase II [Pararhodobacter]                        | WP_107749575 |

|        |      |                 |        |     |           |                                                                                                 |              |
|--------|------|-----------------|--------|-----|-----------|-------------------------------------------------------------------------------------------------|--------------|
|        |      |                 |        |     |           | aggregans]                                                                                      |              |
| KS_473 | 1175 | CLR_cluster_012 | 81.538 | 390 | 0         | Beta-ketoacyl-[acyl-carrier-protein] synthase II [Thioalkalivibrio sp. HK1]                     | WP_038098656 |
| KS_479 | 1184 | CLR_cluster_112 | 60.459 | 392 | 6.45E-180 | Beta-ketoacyl-[acyl-carrier-protein] synthase II [Vulcanibacillus modesticaldus]                | WP_069655673 |
| KS_483 | 1112 | CLR_cluster_017 | 62.216 | 352 | 1.20E-134 | Beta-ketoacyl-ACP synthase II [Ilumatobacter nonamiensis]                                       | WP_040493091 |
| KS_488 | 1076 | CLR_cluster_277 | 59.889 | 359 | 6.71E-152 | Beta-ketoacyl-[acyl-carrier-protein] synthase II [Melioribacter roseus]                         | WP_014857116 |
| KS_503 | 1286 | CLR_cluster_174 | 54.545 | 429 | 2.10E-139 | Hybrid non-ribosomal peptide synthetase/Type I polyketide synthase [Burkholderia vietnamiensis] | WP_059454702 |
| KS_504 | 1157 | CLR_cluster_176 | 44.615 | 390 | 8.25E-88  | Type I polyketide synthase [Nocardiopsis sp. NRRL B-16309]                                      | WP_053618745 |
| KS_505 | 1286 | CLR_cluster_005 | 52.727 | 440 | 3.19E-138 | Type I polyketide synthase [Mycobacterium sp. IS-1590]                                          | WP_064404744 |
| KS_508 | 1292 | CLR_cluster_107 | 43.218 | 435 | 1.69E-88  | Type I polyketide synthase [Streptomyces rubellomurinus]                                        | WP_078860657 |
| KS_514 | 1184 | CLR_cluster_072 | 63.265 | 392 | 0         | Beta-ketoacyl-[acyl-carrier-protein] synthase II [Thermodesulfovibrio sp. N1]                   | WP_068860060 |
| KS_518 | 1244 | CLR_cluster_144 | 61.557 | 424 | 2.54E-152 | Type I polyketide synthase [Mycolicibacterium austroafricanum]                                  | WP_051558318 |
| KS_521 | 1220 | CLR_cluster_156 | 63.027 | 403 | 0         | Beta-ketoacyl-[acyl-carrier-protein] synthase II [Albimonas donghaensis]                        | WP_092679786 |
| KS_527 | 1286 | CLR_cluster_149 | 57.674 | 430 | 1.27E-150 | Type I polyketide synthase [Mycolicibacterium diernhoferi]                                      | WP_073855454 |
| KS_528 | 1292 | CLR_cluster_024 | 52.214 | 429 | 1.95E-134 | Hybrid non-ribosomal peptide synthetase/Type I polyketide synthase [Burkholderia vietnamiensis] | WP_059603382 |
| KS_536 | 1292 | CLR_cluster_029 | 53.846 | 429 | 2.94E-140 | Hybrid non-ribosomal peptide synthetase/Type I polyketide synthase [Burkholderia vietnamiensis] | WP_059740130 |
| KS_537 | 1286 | CLR_cluster_153 | 53.132 | 431 | 3.70E-136 | Type I polyketide synthase [Mycolicibacterium rhodesiae]                                        | WP_005142704 |
| KS_540 | 1286 | CLR_cluster_040 | 54.312 | 429 | 5.27E-139 | Type I polyketide synthase, partial [Burkholderia vietnamiensis]                                | WP_059567396 |
| KS_546 | 1286 | CLR_cluster_159 | 57.11  | 429 | 4.66E-145 | Type I polyketide synthase [Mycolicibacterium obuense]                                          | WP_048421716 |
| KS_549 | 1283 | CLR_cluster_123 | 60.047 | 428 | 3.16E-150 | Type I polyketide synthase [Mycolicibacterium austroafricanum]                                  | WP_051558318 |
| KS_550 | 1277 | CLR_cluster_066 | 62.441 | 426 | 2.34E-159 | Type I polyketide synthase [Mycolicibacterium austroafricanum]                                  | WP_105389463 |
| KS_557 | 1301 | CLR_cluster_194 | 58.837 | 430 | 2.48E-146 | Type I polyketide synthase [Mycolicibacterium austroafricanum]                                  | WP_105389463 |
| KS_558 | 1250 | CLR_cluster_059 | 60.28  | 428 | 4.17E-151 | Type I polyketide synthase [Mycolicibacterium austroafricanum]                                  | WP_105389463 |
| KS_563 | 1292 | CLR_cluster_034 | 53.613 | 429 | 2.01E-140 | Type I polyketide synthase, partial [Burkholderia vietnamiensis]                                | WP_059567396 |
| KS_564 | 1286 | CLR_cluster_124 | 55.349 | 430 | 2.54E-141 | Type I polyketide synthase [Mycolicibacterium tusciae]                                          | WP_006241768 |
| KS_576 | 1094 | CLR_cluster_232 | 50.138 | 363 | 6.06E-119 | Beta-ketoacyl-[acyl-carrier-protein] synthase II [Effusibacillus pohliae]                       | WP_026174345 |
| KS_579 | 1178 | CLR_cluster_008 | 61.675 | 394 | 2.00E-156 | Hypothetical protein [Verminephrobacter aporrectodeae]                                          | WP_081479930 |
| KS_580 | 1010 | CLR_cluster_070 | 53.266 | 199 | 2.08E-62  | Beta-ketoacyl-ACP synthase [Cellvibrio sp. pealriver]                                           | WP_082191725 |
| KS_585 | 989  | CLR_cluster_221 | 65.702 | 242 | 2.23E-103 | Beta-ketoacyl-ACP synthase [Halothiobacillus neapolitanus]                                      | WP_041601094 |
| KS_586 | 1184 | CLR_cluster_044 | 59.836 | 366 | 1.79E-136 | Hypothetical protein [Verminephrobacter aporrectodeae]                                          | WP_081479930 |

|        |      |                 |        |     |           |                                                                        |              |
|--------|------|-----------------|--------|-----|-----------|------------------------------------------------------------------------|--------------|
| KS_590 | 1094 | CLR_cluster_020 | 65.479 | 365 | 5.69E-147 | Type I polyketide synthase [Mycobacterium sp. 852002-53434 SCH5985345] | WP_066952779 |
| KS_591 | 1283 | CLR_cluster_026 | 60.941 | 425 | 5.36E-159 | Type I polyketide synthase [Mycobacterium sp. EPa45]                   | WP_047332984 |
| KS_602 | 722  | CLR_cluster_247 | 45.455 | 242 | 3.01E-56  | Type I polyketide synthase [Halomicronema hongdechloris]               | WP_088431332 |
| KS_605 | 851  | CLR_cluster_109 | 68.726 | 259 | 3.09E-125 | Beta-ketoacyl synthase [Vitosangium sp. GDMCC 1.1324]                  | WP_108066665 |
| KS_607 | 653  | CLR_cluster_068 | 65.728 | 213 | 9.29E-86  | Type I polyketide synthase [Chondromyces crocatus]                     | WP_082362832 |
| KS_608 | 599  | CLR_cluster_234 | 66.327 | 196 | 9.91E-78  | Type I polyketide synthase [Mycobacterium palustre]                    | WP_085077785 |
| KS_609 | 545  | CLR_cluster_163 | 63.218 | 174 | 4.67E-63  | Type I polyketide synthase [Mycobacterium]                             | WP_024450282 |
| KS_611 | 449  | CLR_cluster_235 | 50.336 | 149 | 4.12E-34  | Type I Polyketide synthase [Sciscionella sp. SE31]                     | WP_031469821 |
| KS_613 | 362  | CLR_cluster_180 | 63.025 | 119 | 1.09E-44  | Type I polyketide synthase [Mycobacterium malmoense]                   | WP_065480691 |
| KS_615 | 1262 | CLR_cluster_197 | 54.953 | 424 | 7.75E-136 | Type I polyketide synthase [Mycobacterium sp. 852002-51613 SCH5001154] | WP_067261613 |
| KS_616 | 341  | CLR_cluster_245 | 69.091 | 110 | 1.93E-42  | Type I polyketide synthase [Mycobacterium palustre]                    | WP_085077785 |
| KS_617 | 233  | CLR_cluster_250 | 62.162 | 74  | 1.44E-21  | Type I polyketide synthase [Streptomyces oceani]                       | WP_070196673 |
| KS_618 | 233  | CLR_cluster_255 | 59.459 | 74  | 1.32E-21  | Type I polyketide synthase [Archangium violaceum]                      | WP_052519209 |
| KS_619 | 245  | CLR_cluster_268 | 62.5   | 80  | 5.18E-25  | Type I polyketide synthase [Streptomyces oceani]                       | WP_070196673 |
| KS_620 | 1259 | CLR_cluster_125 | 56.44  | 427 | 2.21E-141 | Type I polyketide synthase [Mycolicibacterium tusciae]                 | WP_006241768 |
| KS_626 | 1265 | CLR_cluster_136 | 57.412 | 425 | 6.81E-145 | Type I polyketide synthase [Mycolicibacterium austroafricanum]         | WP_051558318 |
| KS_630 | 1259 | CLR_cluster_175 | 60.235 | 425 | 2.83E-148 | Type I polyketide synthase [Mycolicibacterium austroafricanum]         | WP_105389463 |
| KS_633 | 1265 | CLR_cluster_093 | 59.811 | 423 | 6.27E-149 | Type I polyketide synthase [Mycolicibacterium austroafricanum]         | WP_051558318 |
| KS_637 | 1262 | CLR_cluster_160 | 61.412 | 425 | 3.76E-157 | Type I polyketide synthase [Mycolicibacterium austroafricanum]         | WP_105389463 |
| KS_640 | 1259 | CLR_cluster_154 | 54.273 | 433 | 1.56E-137 | Type I polyketide synthase [Mycobacterium avium]                       | WP_033720430 |
| KS_644 | 1256 | CLR_cluster_026 | 61.647 | 425 | 2.67E-156 | Type I polyketide synthase [Mycolicibacterium austroafricanum]         | WP_105389463 |
| KS_645 | 1259 | CLR_cluster_161 | 57.075 | 424 | 4.43E-144 | Type I polyketide synthase [Mycolicibacterium vanbaalenii]             | WP_011778276 |
| KS_646 | 1256 | CLR_cluster_117 | 58.156 | 423 | 4.92E-141 | Type I polyketide synthase [Mycolicibacterium austroafricanum]         | WP_051558318 |
| KS_649 | 1259 | CLR_cluster_080 | 54.93  | 426 | 4.19E-136 | Type I polyketide synthase [Mycolicibacterium austroafricanum]         | WP_105389463 |
| KS_654 | 1244 | CLR_cluster_058 | 57.569 | 436 | 3.25E-145 | Type I polyketide synthase [Mycolicibacterium austroafricanum]         | WP_105389463 |
| KS_659 | 1259 | CLR_cluster_047 | 60.142 | 424 | 6.00E-151 | Type I polyketide synthase [Mycolicibacterium austroafricanum]         | WP_105389463 |
| KS_661 | 1265 | CLR_cluster_103 | 55.529 | 425 | 3.02E-140 | Type I polyketide synthase [Mycobacterium parmense]                    | WP_085270770 |
| KS_669 | 1235 | CLR_cluster_208 | 53.938 | 419 | 2.05E-136 | Type I polyketide synthase [Mycobacterium palustre]                    | WP_085077785 |
| KS_671 | 1259 | CLR_cluster_048 | 56.206 | 427 | 4.81E-142 | Type I polyketide synthase [Mycobacterium gordonae]                    | WP_065044175 |
| KS_674 | 1268 | CLR_cluster_020 | 62.411 | 423 | 3.97E-160 | Type I polyketide synthase [Mycolicibacterium austroafricanum]         | WP_105389463 |
| KS_681 | 1277 | CLR_cluster_075 | 60.78  | 436 | 8.34E-157 | Type I polyketide synthase [Mycolicibacterium austroafricanum]         | WP_105389463 |

|        |      |                 |        |     |           |                                                                |              |
|--------|------|-----------------|--------|-----|-----------|----------------------------------------------------------------|--------------|
| KS_683 | 1268 | CLR_cluster_075 | 60.757 | 423 | 2.61E-154 | Type I polyketide synthase [Mycobacterium sp. TBL 1200985]     | WP_085324847 |
| KS_688 | 1259 | CLR_cluster_068 | 54.717 | 424 | 1.34E-138 | Type I polyketide synthase [Mycobacterium sp. 1245111.1]       | WP_067331050 |
| KS_695 | 1259 | CLR_cluster_056 | 58.156 | 423 | 2.13E-143 | Type I polyketide synthase [Mycolicibacterium austroafricanum] | WP_105389463 |
| KS_701 | 1271 | CLR_cluster_173 | 60.757 | 423 | 3.73E-153 | Type I polyketide synthase [Mycobacterium asiaticum]           | WP_065146316 |
| KS_705 | 1259 | CLR_cluster_206 | 53.412 | 425 | 1.06E-137 | Type I polyketide synthase [Mycolicibacterium vanbaalenii]     | WP_011778276 |
| KS_708 | 1262 | CLR_cluster_242 | 54.439 | 428 | 3.32E-139 | Type I polyketide synthase [Mycolicibacterium bacteremicum]    | WP_083056565 |
| KS_720 | 1259 | CLR_cluster_155 | 54.588 | 425 | 7.94E-135 | Type I polyketide synthase [Mycobacterium avium]               | WP_062889895 |
| KS_726 | 1259 | CLR_cluster_005 | 57.176 | 425 | 4.59E-142 | Type I polyketide synthase [Mycolicibacterium austroafricanum] | WP_105389463 |
| KS_728 | 1259 | CLR_cluster_057 | 56     | 425 | 4.08E-135 | Type I polyketide synthase [Mycolicibacterium austroafricanum] | WP_105389463 |
| KS_730 | 1265 | CLR_cluster_040 | 56.132 | 424 | 1.84E-134 | Type I polyketide synthase [Mycolicibacterium austroafricanum] | WP_105389463 |
| KS_732 | 1262 | CLR_cluster_034 | 55.164 | 426 | 1.85E-139 | Type I polyketide synthase [Mycolicibacterium vanbaalenii]     | WP_011778276 |
| KS_747 | 1109 | CLR_cluster_146 | 65.847 | 366 | 1.18E-149 | Type I polyketide synthase [Mycolicibacterium austroafricanum] | WP_105389463 |
| KS_749 | 1319 | CLR_cluster_050 | 52.822 | 443 | 2.88E-137 | Type I polyketide synthase [Mycolicibacterium austroafricanum] | WP_105389463 |
| KS_751 | 224  | CLR_cluster_130 | 62.5   | 72  | 5.60E-21  | Type I polyketide synthase [Streptomyces bungoensis]           | WP_079060019 |
| KS_755 | 1262 | CLR_cluster_047 | 61.939 | 423 | 5.53E-157 | Type I polyketide synthase [Mycolicibacterium austroafricanum] | WP_105389463 |
| KS_757 | 1250 | CLR_cluster_020 | 59.155 | 426 | 6.74E-151 | Type I polyketide synthase [Mycolicibacterium austroafricanum] | WP_105389463 |
| KS_761 | 1277 | CLR_cluster_026 | 58.156 | 423 | 1.25E-144 | Type I polyketide synthase [Mycobacterium sp. IS-1744]         | WP_064399965 |

Table S12. BLAST search of the KS sequences from the metagenome of *R. globostellata* against the refseq\_protein database in NCBI

| KS ID  | Length (nt) | BGC ID          | Identity (%) | Alignment length (aa) | E-value   | The homologenus sequences                                                     | Accession number |
|--------|-------------|-----------------|--------------|-----------------------|-----------|-------------------------------------------------------------------------------|------------------|
| KS_001 | 696         | RHG_cluster_258 | 67.686       | 229                   | 1.03E-91  | Type I polyketide synthase [Mycolicibacterium austroafricanum]                | WP_051558318     |
| KS_004 | 1185        | RHG_cluster_332 | 51.005       | 398                   | 2.89E-135 | Beta-ketoacyl-[acyl-carrier-protein] synthase II [Phormidium willei]          | WP_068789276     |
| KS_006 | 1128        | RHG_cluster_316 | 57.808       | 365                   | 4.49E-129 | Type I polyketide synthase [Mycobacterium sp. 1245805.9]                      | WP_067160573     |
| KS_007 | 1059        | RHG_cluster_341 | 42.407       | 349                   | 1.39E-74  | Type I polyketide synthase [Mycolicibacter sinensis]                          | WP_065023448     |
| KS_010 | 1176        | RHG_cluster_342 | 59.788       | 378                   | 1.42E-136 | Type I polyketide synthase [Mycolicibacterium austroafricanum]                | WP_105389463     |
| KS_011 | 801         | RHG_cluster_340 | 52.574       | 272                   | 4.83E-90  | Type I polyketide synthase [Mycobacterium sp. EPG1]                           | WP_104861258     |
| KS_012 | 429         | RHG_cluster_282 | 65.942       | 138                   | 5.20E-56  | Type I polyketide synthase [Mycobacterium sp. YC-RL4]                         | WP_082901975     |
| KS_014 | 1086        | RHG_cluster_275 | 54.571       | 361                   | 1.38E-141 | Beta-ketoacyl-[acyl-carrier-protein] synthase II [Thermosulfidibacter takaii] | WP_068550102     |
| KS_016 | 1239        | RHG_cluster_191 | 62.028       | 424                   | 6.86E-157 | Type I polyketide synthase [Mycobacterium asiaticum]                          | WP_065036774     |
| KS_019 | 1017        | RHG_cluster_352 | 68.437       | 339                   | 3.82E-176 | Beta-ketoacyl-ACP synthase I [Methylothericola oryzae]                        | WP_045223829     |
| KS_020 | 705         | RHG_cluster_308 | 65.939       | 229                   | 3.01E-91  | Type I polyketide synthase [Mycobacterium sp. 1137317.9]                      | WP_067320514     |
| KS_021 | 771         | RHG_cluster_354 | 49.219       | 256                   | 1.20E-65  | Type I polyketide synthase [Sciscionella marina]                              | WP_020497474     |
| KS_026 | 1080        | RHG_cluster_321 | 62.291       | 358                   | 8.60E-171 | Beta-ketoacyl-[acyl-carrier-protein] synthase II [Geobacter metallireducens]  | WP_004511462     |
| KS_028 | 591         | RHG_cluster_221 | 66.495       | 194                   | 8.64E-78  | Type I polyketide synthase [Mycobacterium sp. YR782]                          | WP_108054808     |
| KS_033 | 1266        | RHG_cluster_087 | 59.674       | 429                   | 1.45E-143 | Type I polyketide synthase [Mycolicibacterium vanbaalenii]                    | WP_011778276     |
| KS_036 | 792         | RHG_cluster_345 | 62.548       | 259                   | 1.08E-99  | Type I polyketide synthase [Mycobacterium sp. 1137317.9]                      | WP_067320514     |
| KS_037 | 390         | RHG_cluster_351 | 66.667       | 126                   | 3.75E-47  | Type I polyketide synthase [Mycolicibacterium diernhoferi]                    | WP_073855454     |
| KS_040 | 1038        | RHG_cluster_295 | 58.841       | 345                   | 7.23E-119 | Type I polyketide synthase [Mycolicibacterium austroafricanum]                | WP_051558318     |
| KS_043 | 540         | RHG_cluster_283 | 45.055       | 182                   | 6.17E-38  | Type I polyketide synthase [Streptomyces cattleya]                            | WP_014144002     |
| KS_045 | 741         | RHG_cluster_338 | 61.411       | 241                   | 1.90E-90  | Type I polyketide synthase [Mycolicibacterium diernhoferi]                    | WP_073855454     |
| KS_046 | 354         | RHG_cluster_362 | 50           | 118                   | 1.33E-25  | Type I polyketide synthase [Streptomyces]                                     | WP_030626723     |
| KS_048 | 1266        | RHG_cluster_136 | 40.61        | 426                   | 2.55E-83  | Type I polyketide synthase [Streptomyces sp. WMMB 714]                        | WP_045862080     |
| KS_052 | 285         | RHG_cluster_367 | 61.111       | 90                    | 6.77E-30  | Type I polyketide synthase [filamentous cyanobacterium CCP3]                  | WP_106919617     |
| KS_053 | 543         | RHG_cluster_357 | 67.797       | 177                   | 1.32E-68  | Type I polyketide synthase [Mycolicibacterium diernhoferi]                    | WP_073855454     |
| KS_054 | 525         | RHG_cluster_356 | 67.442       | 172                   | 1.46E-68  | Type I polyketide synthase [Mycobacterium colombiense]                        | WP_065125467     |
| KS_056 | 1008        | RHG_cluster_355 | 72.321       | 336                   | 0         | Beta-ketoacyl-[acyl-carrier-protein] synthase II [Rhodothermus marinus]       | WP_014068140     |
| KS_060 | 444         | RHG_cluster_183 | 49.664       | 149                   | 1.79E-33  | Type I polyketide synthase [Nocardiopsis sp. NRRL B-16309]                    | WP_053618745     |
| KS_062 | 657         | RHG_cluster_318 | 65.238       | 210                   | 2.06E-84  | Type I polyketide synthase [Mycolicibacterium diernhoferi]                    | WP_073855454     |

|        |      |                 |        |     |           |                                                                                                |              |
|--------|------|-----------------|--------|-----|-----------|------------------------------------------------------------------------------------------------|--------------|
| KS_063 | 1230 | RHG_cluster_019 | 61.722 | 418 | 1.22E-149 | Type I polyketide synthase [Mycolicibacterium austroafricanum]                                 | WP_051558318 |
| KS_065 | 591  | RHG_cluster_255 | 65.464 | 194 | 1.82E-76  | Type I polyketide synthase [Mycobacterium sp. YR782]                                           | WP_108054808 |
| KS_067 | 1272 | RHG_cluster_124 | 58.629 | 423 | 4.31E-148 | Type I polyketide synthase [Mycobacterium colombiense]                                         | WP_044486300 |
| KS_069 | 825  | RHG_cluster_168 | 61.397 | 272 | 3.43E-103 | Type I polyketide synthase [Mycolicibacterium diernhoferi]                                     | WP_073855454 |
| KS_071 | 1152 | RHG_cluster_294 | 58.743 | 366 | 6.93E-127 | Type I polyketide synthase [Mycobacterium sp. PYR15]                                           | WP_096309613 |
| KS_074 | 1187 | RHG_cluster_151 | 66.667 | 396 | 0         | Beta-ketoacyl-[acyl-carrier-protein] synthase II [Bryobacter aggregatus]                       | WP_031496688 |
| KS_075 | 1136 | RHG_cluster_164 | 61.538 | 351 | 7.49E-131 | Hybrid non-ribosomal peptide synthetase/Type I polyketide synthase [Methylosinus sp. LW4]      | WP_026191724 |
| KS_077 | 1097 | RHG_cluster_310 | 73.889 | 360 | 0         | Beta-ketoacyl-[acyl-carrier-protein] synthase II [marine gamma proteobacterium HTCC2148]       | WP_007230914 |
| KS_080 | 1094 | RHG_cluster_343 | 59.178 | 365 | 8.84E-163 | Beta-ketoacyl-[acyl-carrier-protein] synthase II [Vulcanibacillus modesticaldus]               | WP_069655673 |
| KS_083 | 1130 | RHG_cluster_336 | 53.439 | 378 | 2.38E-120 | Type I polyketide synthase [Mycobacterium sp. UNC267MFSHa1.1M11]                               | WP_090362897 |
| KS_088 | 893  | RHG_cluster_279 | 62.766 | 282 | 2.96E-110 | Type I polyketide synthase [Mycobacterium sp. 1137317.9]                                       | WP_067320514 |
| KS_091 | 977  | RHG_cluster_119 | 66.254 | 323 | 2.35E-129 | Type I polyketide synthase [Mycobacterium sp. 1137317.9]                                       | WP_067320514 |
| KS_094 | 1097 | RHG_cluster_111 | 43.529 | 340 | 3.24E-77  | Hypothetical protein [Sandaracinus amylolyticus]                                               | WP_053231614 |
| KS_096 | 1097 | RHG_cluster_116 | 45.507 | 345 | 1.98E-79  | Hypothetical protein [Sandaracinus amylolyticus]                                               | WP_053231614 |
| KS_098 | 1100 | RHG_cluster_184 | 44.048 | 252 | 2.58E-59  | Beta-ketoacyl-[acyl-carrier-protein] synthase family protein [Acidobacteria bacterium KBS 146] | WP_026387381 |
| KS_103 | 1007 | RHG_cluster_365 | 58.333 | 336 | 2.18E-128 | Beta-ketoacyl-[acyl-carrier-protein] synthase II [Roseiflexus castenholzii]                    | WP_041330400 |
| KS_104 | 1223 | RHG_cluster_007 | 82.02  | 406 | 0         | Beta-ketoacyl-[acyl-carrier-protein] synthase II [Thioalkalivibrio sp. HK1]                    | WP_038098656 |
| KS_107 | 1223 | RHG_cluster_018 | 59.705 | 407 | 2.56E-177 | Beta-ketoacyl-[acyl-carrier-protein] synthase II [Clostridiisalibacter paucivorans]            | WP_026893881 |
| KS_108 | 1217 | RHG_cluster_278 | 95.05  | 404 | 0         | Beta-ketoacyl-ACP synthase I [Rhodospirillaceae bacterium Spongia-Bin9]                        | WP_108794197 |
| KS_109 | 1208 | RHG_cluster_153 | 75     | 400 | 0         | Beta-ketoacyl-ACP synthase I [Inquilinus limosus]                                              | WP_026872496 |
| KS_110 | 1202 | RHG_cluster_073 | 71.859 | 398 | 0         | Beta-ketoacyl-ACP synthase I [Salinicola sp. MIT1003]                                          | WP_071230737 |
| KS_112 | 1250 | RHG_cluster_127 | 74.576 | 413 | 0         | Beta-ketoacyl-[acyl-carrier-protein] synthase II [Rhodospirillales bacterium URHD0088]         | WP_027300572 |
| KS_113 | 1259 | RHG_cluster_237 | 51.878 | 426 | 3.08E-126 | Type I polyketide synthase [Mycobacterium colombiense]                                         | WP_065030390 |
| KS_130 | 1091 | RHG_cluster_315 | 65.123 | 367 | 2.50E-171 | Beta-ketoacyl-[acyl-carrier-protein] synthase II [Amphritea japonica]                          | WP_026340126 |
| KS_131 | 1226 | RHG_cluster_098 | 58.333 | 408 | 6.75E-169 | Beta-ketoacyl-[acyl-carrier-protein] synthase II [Thermoflexus hugenholtzii]                   | WP_098504503 |
| KS_135 | 1199 | RHG_cluster_033 | 67.758 | 397 | 0         | Beta-ketoacyl-[acyl-carrier-protein] synthase family protein [Rhodovulum sp. MB263]            | WP_080616320 |
| KS_137 | 1184 | RHG_cluster_156 | 77.215 | 395 | 0         | Beta-ketoacyl-ACP synthase I [Albidovulum inexpectatum]                                        | WP_104068930 |

|        |      |                 |        |     |           |                                                                                         |              |
|--------|------|-----------------|--------|-----|-----------|-----------------------------------------------------------------------------------------|--------------|
| KS_140 | 1250 | RHG_cluster_277 | 73.366 | 413 | 0         | Beta-ketoacyl-[acyl-carrier-protein] synthase II [Rhodospirillales bacterium URHD0088]  | WP_027300572 |
| KS_143 | 1223 | RHG_cluster_049 | 74.138 | 406 | 0         | Beta-ketoacyl-[acyl-carrier-protein] synthase II [Thioalkalivibrio sp. HK1]             | WP_038098656 |
| KS_144 | 1223 | RHG_cluster_138 | 59.705 | 407 | 1.90E-180 | Beta-ketoacyl-[acyl-carrier-protein] synthase II [Risunghinella massiliensis]           | WP_044642594 |
| KS_148 | 1214 | RHG_cluster_231 | 67.782 | 239 | 1.03E-117 | Beta-ketoacyl-ACP synthase [Aeromonas sp. HMWF016]                                      | WP_108570661 |
| KS_151 | 1196 | RHG_cluster_250 | 68.09  | 398 | 0         | Beta-ketoacyl-ACP synthase I [Halomonas sp. HL-48]                                      | WP_027337473 |
| KS_153 | 1250 | RHG_cluster_079 | 51.914 | 418 | 4.60E-142 | Beta-ketoacyl-[acyl-carrier-protein] synthase family protein [Syntrophobacter sp. SbD1] | WP_106821390 |
| KS_161 | 1073 | RHG_cluster_292 | 78.492 | 358 | 0         | Beta-ketoacyl-ACP synthase I [Haliea salexigens]                                        | WP_027950912 |
| KS_162 | 1202 | RHG_cluster_108 | 67.75  | 400 | 0         | Beta-ketoacyl-ACP synthase I [Methyloterricola oryzae]                                  | WP_045223829 |
| KS_166 | 1223 | RHG_cluster_023 | 66.667 | 408 | 0         | Beta-ketoacyl-[acyl-carrier-protein] synthase II [Pyrinomonas methylaliphatogenes]      | WP_041976954 |
| KS_167 | 1151 | RHG_cluster_271 | 69.531 | 384 | 0         | Beta-ketoacyl-[acyl-carrier-protein] synthase II [Solibacteres bacterium SbA2]          | WP_105314403 |
| KS_173 | 1253 | RHG_cluster_326 | 55.66  | 424 | 1.22E-141 | Type I polyketide synthase [Mycolicibacterium austroafricanum]                          | WP_051558318 |
| KS_174 | 1229 | RHG_cluster_130 | 58.293 | 410 | 1.23E-167 | Beta-ketoacyl-[acyl-carrier-protein] synthase II [Desmospora sp. 8437]                  | WP_040387222 |
| KS_175 | 1217 | RHG_cluster_114 | 58.025 | 405 | 4.80E-177 | Beta-ketoacyl-[acyl-carrier-protein] synthase II [Bacillales]                           | WP_029100165 |
| KS_176 | 1265 | RHG_cluster_335 | 56.338 | 426 | 9.28E-143 | Type I polyketide synthase, partial [Mycobacterium colombiense]                         | WP_082282154 |
| KS_178 | 1187 | RHG_cluster_217 | 57.027 | 370 | 2.90E-128 | Type I polyketide synthase [Mycobacterium sp. 852002-30065 SCH5024008]                  | WP_067203355 |
| KS_181 | 1223 | RHG_cluster_188 | 64.532 | 406 | 0         | Beta-ketoacyl-[acyl-carrier-protein] synthase II [Moorella humiferrea]                  | WP_106006374 |
| KS_182 | 1223 | RHG_cluster_225 | 60.688 | 407 | 0         | Beta-ketoacyl-[acyl-carrier-protein] synthase II [Kroppenstedtia eburnea]               | WP_076523249 |
| KS_186 | 1280 | RHG_cluster_078 | 43.972 | 423 | 2.44E-119 | Hypothetical protein [Syntrophobacter sp. SbD1]                                         | WP_106821393 |
| KS_188 | 1217 | RHG_cluster_009 | 64.109 | 404 | 0         | Beta-ketoacyl-[acyl-carrier-protein] synthase II [Pseudomonas pachastrellae]            | WP_083725910 |
| KS_189 | 1196 | RHG_cluster_334 | 65.163 | 399 | 0         | Beta-ketoacyl-[acyl-carrier-protein] synthase II [Dyella]                               | WP_026634449 |
| KS_191 | 1226 | RHG_cluster_142 | 61.916 | 407 | 0         | Beta-ketoacyl-[acyl-carrier-protein] synthase II [Pseudomonas pachastrellae]            | WP_083725910 |
| KS_193 | 1091 | RHG_cluster_359 | 66.027 | 365 | 0         | Beta-ketoacyl-[acyl-carrier-protein] synthase II [Sulfuricaulis limicola]               | WP_096361882 |
| KS_195 | 1163 | RHG_cluster_122 | 62.304 | 382 | 1.50E-179 | Beta-ketoacyl-[acyl-carrier-protein] synthase II [Pseudomonas pachastrellae]            | WP_083725910 |
| KS_197 | 1226 | RHG_cluster_305 | 61.52  | 408 | 1.94E-179 | Beta-ketoacyl-[acyl-carrier-protein] synthase II [Nitrosomonas europaea]                | WP_011112207 |
| KS_202 | 1223 | RHG_cluster_344 | 64.491 | 383 | 0         | Beta-ketoacyl-[acyl-carrier-protein] synthase II [Sulfuricaulis limicola]               | WP_096361882 |
| KS_203 | 1217 | RHG_cluster_235 | 66.502 | 406 | 0         | Beta-ketoacyl-[acyl-carrier-protein] synthase II [Thioflavicoccus mobilis]              | WP_015281247 |

|        |      |                 |        |     |           |                                                                                         |              |
|--------|------|-----------------|--------|-----|-----------|-----------------------------------------------------------------------------------------|--------------|
| KS_205 | 1064 | RHG_cluster_120 | 69.057 | 265 | 2.37E-130 | Beta-ketoacyl-ACP synthase [Cupriavidus oxalaticus]                                     | WP_063237600 |
| KS_218 | 1136 | RHG_cluster_080 | 34.072 | 361 | 3.96E-45  | Hypothetical protein [Nitrospirae bacterium HCH-1]                                      | WP_085053639 |
| KS_220 | 1223 | RHG_cluster_274 | 67.885 | 383 | 0         | Beta-ketoacyl-[acyl-carrier-protein] synthase II [Oceanicoccus sagamiensis]             | WP_085759718 |
| KS_223 | 1223 | RHG_cluster_012 | 71.253 | 407 | 0         | Beta-ketoacyl-[acyl-carrier-protein] synthase II [Ectothiorhodospira haloalkaliphila]   | WP_025281708 |
| KS_224 | 1259 | RHG_cluster_296 | 56.235 | 425 | 2.55E-142 | Type I polyketide synthase [Mycolicibacterium austroafricanum]                          | WP_051558318 |
| KS_225 | 1223 | RHG_cluster_319 | 64.691 | 405 | 0         | Beta-ketoacyl-[acyl-carrier-protein] synthase II [Pyrinomonas methylaliphatoenes]       | WP_041976954 |
| KS_235 | 1217 | RHG_cluster_324 | 56.724 | 409 | 8.77E-172 | Beta-ketoacyl-[acyl-carrier-protein] synthase II [Candidatus Desulfofervidus auxilii]   | WP_066064784 |
| KS_236 | 1223 | RHG_cluster_347 | 67.734 | 406 | 0         | Beta-ketoacyl-[acyl-carrier-protein] synthase II [Halomonas sp. A11-A]                  | WP_110068027 |
| KS_237 | 1223 | RHG_cluster_281 | 69.608 | 408 | 0         | Beta-ketoacyl-[acyl-carrier-protein] synthase II [Solibacteres bacterium SbA2]          | WP_105314403 |
| KS_240 | 1157 | RHG_cluster_051 | 54.45  | 382 | 4.06E-134 | Beta-ketoacyl-ACP synthase II [Ferrimicrobium acidiphilum]                              | WP_052566261 |
| KS_244 | 1220 | RHG_cluster_263 | 68.227 | 406 | 0         | Beta-ketoacyl-[acyl-carrier-protein] synthase II [Methylomagnum ishizawai]              | WP_085216214 |
| KS_249 | 1226 | RHG_cluster_220 | 61.916 | 407 | 0         | Beta-ketoacyl-[acyl-carrier-protein] synthase II [Pseudomonas pachastrellae]            | WP_083725910 |
| KS_252 | 1292 | RHG_cluster_011 | 44.749 | 438 | 3.54E-94  | Type I polyketide synthase [Sciscionella marina]                                        | WP_020497474 |
| KS_254 | 1226 | RHG_cluster_301 | 61.029 | 408 | 0         | Beta-ketoacyl-[acyl-carrier-protein] synthase II [Aneurinibacillus terranovensis]       | WP_027414564 |
| KS_256 | 1229 | RHG_cluster_039 | 56.829 | 410 | 1.52E-163 | Beta-ketoacyl-[acyl-carrier-protein] synthase II [Rhodothermus marinus]                 | WP_012845172 |
| KS_259 | 1220 | RHG_cluster_148 | 53.35  | 403 | 6.60E-137 | Beta-ketoacyl-[acyl-carrier-protein] synthase family protein [Nibracoccus aquaticus]    | WP_096057284 |
| KS_261 | 1223 | RHG_cluster_035 | 74.384 | 406 | 0         | Beta-ketoacyl-[acyl-carrier-protein] synthase II [Thioalkalivibrio sulfidiphilus]       | WP_026289556 |
| KS_264 | 1214 | RHG_cluster_227 | 63.366 | 404 | 0         | Beta-ketoacyl-[acyl-carrier-protein] synthase II [Thermoanaerobaculum aquaticum]        | WP_038046901 |
| KS_267 | 1292 | RHG_cluster_028 | 44.749 | 438 | 4.91E-94  | Type I polyketide synthase [Sciscionella marina]                                        | WP_020497474 |
| KS_269 | 1151 | RHG_cluster_212 | 58.377 | 382 | 1.34E-141 | Beta-ketoacyl-ACP synthase II [Streptomyces sp. NRRL F-2664]                            | WP_030765373 |
| KS_270 | 1229 | RHG_cluster_185 | 62.347 | 409 | 0         | Beta-ketoacyl-[acyl-carrier-protein] synthase II [Nitrosomonas aestuarii]               | WP_090702733 |
| KS_278 | 1226 | RHG_cluster_020 | 60.294 | 408 | 0         | Beta-ketoacyl-[acyl-carrier-protein] synthase II [Vulcanibacillus modesticaldus]        | WP_069655673 |
| KS_285 | 1280 | RHG_cluster_081 | 55.556 | 423 | 1.73E-163 | Beta-ketoacyl-[acyl-carrier-protein] synthase family protein [Syntrophobacter sp. Sbd1] | WP_106821387 |
| KS_290 | 1292 | RHG_cluster_091 | 41.136 | 440 | 4.86E-87  | Type I polyketide synthase [Crossiella equi]                                            | WP_086785133 |
| KS_292 | 1292 | RHG_cluster_096 | 44.266 | 436 | 9.46E-99  | Type I polyketide synthase [Sciscionella marina]                                        | WP_020497474 |
| KS_295 | 1286 | RHG_cluster_094 | 63.593 | 423 | 4.29E-180 | Type I polyketide synthase [Marinobacterium profundum]                                  | WP_067295857 |



|        |      |                 |        |     |           |                                                                                          |              |
|--------|------|-----------------|--------|-----|-----------|------------------------------------------------------------------------------------------|--------------|
| KS_296 | 1229 | RHG_cluster_244 | 55.774 | 407 | 6.45E-159 | Beta-ketoacyl-[acyl-carrier-protein] synthase II [Desulfotomaculum acetoxidans]          | WP_015756782 |
| KS_298 | 1259 | RHG_cluster_253 | 60.143 | 419 | 7.55E-178 | Beta-ketoacyl-[acyl-carrier-protein] synthase family protein [Syntrophus aciditrophicus] | WP_011418884 |
| KS_299 | 1160 | RHG_cluster_273 | 61.96  | 347 | 3.94E-133 | Beta-ketoacyl-ACP synthase II [Streptomyces katrae]                                      | WP_045950542 |
| KS_300 | 1226 | RHG_cluster_075 | 63.391 | 407 | 0         | Beta-ketoacyl-[acyl-carrier-protein] synthase II [Nitrospina gracilis]                   | WP_042251114 |
| KS_304 | 1154 | RHG_cluster_045 | 53.786 | 383 | 2.20E-131 | Hypothetical protein [Tropicibacter phthalicus]                                          | WP_099241578 |
| KS_313 | 1226 | RHG_cluster_178 | 61.671 | 407 | 0         | Beta-ketoacyl-[acyl-carrier-protein] synthase II [Geobacter metallireducens]             | WP_004511462 |
| KS_316 | 1217 | RHG_cluster_264 | 54.208 | 404 | 6.71E-152 | Beta-ketoacyl-[acyl-carrier-protein] synthase II [Thermorudis peleae]                    | WP_038037697 |
| KS_318 | 1214 | RHG_cluster_030 | 55.941 | 404 | 9.82E-156 | Beta-ketoacyl-[acyl-carrier-protein] synthase II [Thermorudis peleae]                    | WP_038037697 |
| KS_319 | 1160 | RHG_cluster_259 | 60.519 | 347 | 9.63E-131 | Beta-ketoacyl-ACP synthase II [Streptomyces katrae]                                      | WP_045950542 |
| KS_320 | 1286 | RHG_cluster_215 | 53.103 | 435 | 2.46E-137 | Type I polyketide synthase, partial [Burkholderia vietnamiensis]                         | WP_059694304 |
| KS_324 | 1223 | RHG_cluster_313 | 60.197 | 407 | 0         | Beta-ketoacyl-[acyl-carrier-protein] synthase II [Kroppenstedtia eburnea]                | WP_076523249 |
| KS_328 | 1154 | RHG_cluster_133 | 51.558 | 353 | 4.76E-110 | Hypothetical protein [Tropicibacter phthalicus]                                          | WP_099241578 |
| KS_331 | 1160 | RHG_cluster_085 | 62.402 | 383 | 7.80E-149 | Beta-ketoacyl-ACP synthase II [Streptomyces katrae]                                      | WP_045950542 |
| KS_333 | 1286 | RHG_cluster_165 | 53.333 | 435 | 2.05E-138 | Type I polyketide synthase, partial [Burkholderia vietnamiensis]                         | WP_059694304 |
| KS_335 | 1298 | RHG_cluster_302 | 42.759 | 435 | 3.75E-87  | Type I polyketide synthase [Streptomyces]                                                | WP_030626723 |
| KS_343 | 1229 | RHG_cluster_222 | 57.073 | 410 | 1.21E-169 | Beta-ketoacyl-[acyl-carrier-protein] synthase II [Selenihalanaerobacter shriftii]        | WP_078809651 |
| KS_344 | 1292 | RHG_cluster_016 | 42.759 | 435 | 4.48E-89  | Type I polyketide synthase [Streptomyces]                                                | WP_028443132 |
| KS_347 | 1292 | RHG_cluster_034 | 39.723 | 433 | 5.04E-80  | Type I polyketide synthase [Burkholderia thailandensis]                                  | WP_038712449 |
| KS_348 | 1226 | RHG_cluster_348 | 60.539 | 408 | 2.96E-168 | Beta-ketoacyl-[acyl-carrier-protein] synthase II [Thermoflexus hugenholtzii]             | WP_098502948 |
| KS_352 | 1229 | RHG_cluster_004 | 58.435 | 409 | 2.77E-164 | Beta-ketoacyl-[acyl-carrier-protein] synthase II [Desulfoviregula thermocuniculi]        | WP_027718279 |
| KS_355 | 1154 | RHG_cluster_236 | 58.398 | 387 | 1.23E-128 | Beta-ketoacyl-ACP synthase II [Ilumatobacter nonamiensis]                                | WP_040493091 |
| KS_359 | 1292 | RHG_cluster_206 | 42.308 | 442 | 4.00E-89  | Type I polyketide synthase [Crossiella equi]                                             | WP_086785133 |
| KS_365 | 1220 | RHG_cluster_031 | 73.267 | 404 | 0         | Beta-ketoacyl-[acyl-carrier-protein] synthase II [Candidatus Nitrospira nitrosa]         | WP_090746581 |
| KS_367 | 1229 | RHG_cluster_084 | 56.968 | 409 | 1.29E-157 | Beta-ketoacyl-[acyl-carrier-protein] synthase II [Desulfoviregula thermocuniculi]        | WP_027718279 |
| KS_374 | 1184 | RHG_cluster_360 | 55.584 | 394 | 9.43E-150 | Beta-ketoacyl-[acyl-carrier-protein] synthase II [Thermaerobacter subterraneus]          | WP_006905000 |
| KS_377 | 1229 | RHG_cluster_150 | 57.843 | 408 | 8.43E-164 | Beta-ketoacyl-[acyl-carrier-protein] synthase II [Thermoflexus hugenholtzii]             | WP_098502948 |
| KS_380 | 1292 | RHG_cluster_135 | 42.069 | 435 | 4.46E-85  | Type I polyketide synthase, partial [Streptomyces sp. SM5]                               | WP_103492552 |

|        |      |                 |        |     |           |                                                                                                 |              |
|--------|------|-----------------|--------|-----|-----------|-------------------------------------------------------------------------------------------------|--------------|
| KS_387 | 1292 | RHG_cluster_067 | 41.609 | 435 | 1.97E-87  | Type I polyketide synthase [Streptomyces]                                                       | WP_028443132 |
| KS_388 | 1229 | RHG_cluster_317 | 55.746 | 409 | 3.04E-153 | Beta-ketoacyl-[acyl-carrier-protein] synthase II [Thermaerobacter subterraneus]                 | WP_006905000 |
| KS_390 | 1223 | RHG_cluster_172 | 61.084 | 406 | 0         | Beta-ketoacyl-[acyl-carrier-protein] synthase II [Melghirimyces profundicolus]                  | WP_108022554 |
| KS_392 | 1247 | RHG_cluster_097 | 69.976 | 413 | 0         | Beta-ketoacyl-[acyl-carrier-protein] synthase II [Rhodospirillales bacterium URHD0088]          | WP_027300572 |
| KS_396 | 1292 | RHG_cluster_269 | 42.857 | 434 | 4.35E-87  | Type I polyketide synthase [Streptomyces rubellomurinus]                                        | WP_078860657 |
| KS_397 | 1292 | RHG_cluster_202 | 40.138 | 436 | 1.29E-90  | SDR family NAD(P)-dependent oxidoreductase [Leucothrix sp. IMCC9719]                            | WP_109824032 |
| KS_398 | 1286 | RHG_cluster_167 | 54.398 | 432 | 6.98E-141 | Type I polyketide synthase, partial [Burkholderia vietnamiensis]                                | WP_059895285 |
| KS_400 | 1184 | RHG_cluster_132 | 62.5   | 392 | 4.71E-169 | Beta-ketoacyl-[acyl-carrier-protein] synthase family protein [Tropicibacter phthalicus]         | WP_099241574 |
| KS_406 | 1184 | RHG_cluster_044 | 63.265 | 392 | 5.45E-171 | Beta-ketoacyl-[acyl-carrier-protein] synthase family protein [Tropicibacter phthalicus]         | WP_099241574 |
| KS_408 | 1292 | RHG_cluster_128 | 41.685 | 451 | 1.64E-92  | Type I polyketide synthase [Sciscionella marina]                                                | WP_020497474 |
| KS_410 | 1286 | RHG_cluster_037 | 56.744 | 430 | 2.23E-139 | Type I polyketide synthase [Mycolicibacterium austroafricanum]                                  | WP_105389463 |
| KS_411 | 1223 | RHG_cluster_214 | 58.088 | 408 | 3.16E-168 | Beta-ketoacyl-[acyl-carrier-protein] synthase II [Thermoflexus hugenholtzii]                    | WP_098502948 |
| KS_429 | 1292 | RHG_cluster_040 | 57.009 | 428 | 1.06E-141 | Type I polyketide synthase [Mycolicibacterium austroafricanum]                                  | WP_105389463 |
| KS_430 | 1292 | RHG_cluster_109 | 40.732 | 437 | 8.44E-87  | Type I polyketide synthase [Sciscionella marina]                                                | WP_020497474 |
| KS_437 | 1235 | RHG_cluster_077 | 57.421 | 411 | 3.82E-171 | Beta-ketoacyl-[acyl-carrier-protein] synthase II [Desmospora sp. 8437]                          | WP_040387222 |
| KS_439 | 1211 | RHG_cluster_086 | 73.367 | 398 | 0         | Beta-ketoacyl-[acyl-carrier-protein] synthase II [Rhodospirillales bacterium URHD0088]          | WP_027300572 |
| KS_446 | 1289 | RHG_cluster_069 | 52.914 | 429 | 1.34E-136 | Type I polyketide synthase [Mycobacterium colombiense]                                          | WP_007770214 |
| KS_448 | 1292 | RHG_cluster_209 | 40.138 | 436 | 4.26E-89  | SDR family NAD(P)-dependent oxidoreductase [Leucothrix sp. IMCC9719]                            | WP_109824032 |
| KS_449 | 1160 | RHG_cluster_241 | 70.284 | 387 | 0         | Beta-ketoacyl-ACP synthase I [Methylosarcina lacus]                                             | WP_024296926 |
| KS_452 | 1286 | RHG_cluster_249 | 53.364 | 431 | 2.10E-138 | Hybrid non-ribosomal peptide synthetase/Type I polyketide synthase [Burkholderia vietnamiensis] | WP_059740130 |
| KS_453 | 1286 | RHG_cluster_174 | 53.828 | 431 | 2.74E-130 | Type I polyketide synthase, partial [Mycobacterium parascrofulaceum]                            | WP_007169537 |
| KS_459 | 1184 | RHG_cluster_218 | 73.59  | 390 | 0         | Beta-ketoacyl-[acyl-carrier-protein] synthase II [Thioalkalivibrio sp. HK1]                     | WP_038098656 |
| KS_460 | 1145 | RHG_cluster_074 | 57.937 | 378 | 4.72E-130 | Beta-ketoacyl-[acyl-carrier-protein] synthase family protein [Luteibacter yejuensis]            | WP_084621559 |
| KS_462 | 1190 | RHG_cluster_143 | 69.424 | 399 | 0         | Beta-ketoacyl-[acyl-carrier-protein] synthase II [Pararhodobacter aggregans]                    | WP_107749575 |
| KS_468 | 1175 | RHG_cluster_068 | 81.538 | 390 | 0         | Beta-ketoacyl-[acyl-carrier-protein] synthase II [Thioalkalivibrio sp. HK1]                     | WP_038098656 |
| KS_469 | 1286 | RHG_cluster_100 | 54.63  | 432 | 4.20E-140 | Type I polyketide synthase, partial [Burkholderia vietnamiensis]                                | WP_059895285 |

|        |      |                 |        |     |           |                                                                                                 |              |
|--------|------|-----------------|--------|-----|-----------|-------------------------------------------------------------------------------------------------|--------------|
| KS_471 | 1175 | RHG_cluster_144 | 80     | 390 | 0         | Beta-ketoacyl-[acyl-carrier-protein] synthase II [Thioalkalivibrio sp. HK1]                     | WP_038098656 |
| KS_474 | 1211 | RHG_cluster_216 | 73.869 | 398 | 0         | Beta-ketoacyl-[acyl-carrier-protein] synthase II [Telmatospirillum siberiense]                  | WP_101252614 |
| KS_476 | 1133 | RHG_cluster_061 | 43.343 | 353 | 2.63E-80  | Beta-ketoacyl-ACP synthase I [Shewanella amazonensis]                                           | WP_011760267 |
| KS_481 | 1154 | RHG_cluster_303 | 72.063 | 383 | 0         | Beta-ketoacyl-ACP synthase I [Thermopetrobacter sp. TC1]                                        | WP_038035251 |
| KS_484 | 1298 | RHG_cluster_298 | 55.787 | 432 | 2.91E-139 | Type I polyketide synthase [Mycobacterium malmoeense]                                           | WP_071509339 |
| KS_486 | 1112 | RHG_cluster_059 | 62.216 | 352 | 1.20E-134 | Beta-ketoacyl-ACP synthase II [Ilumatobacter nonamiensis]                                       | WP_040493091 |
| KS_490 | 1292 | RHG_cluster_213 | 42.793 | 444 | 5.36E-99  | Type I polyketide synthase [Sciscionella marina]                                                | WP_020497474 |
| KS_491 | 1286 | RHG_cluster_154 | 51.981 | 429 | 7.51E-134 | Type I polyketide synthase [Mycobacterium palustre]                                             | WP_085077785 |
| KS_494 | 1292 | RHG_cluster_072 | 42.045 | 440 | 6.20E-91  | Type I polyketide synthase [Sciscionella marina]                                                | WP_020497474 |
| KS_495 | 1292 | RHG_cluster_272 | 44.091 | 440 | 1.36E-93  | Type I polyketide synthase [Sciscionella marina]                                                | WP_020497474 |
| KS_497 | 1286 | RHG_cluster_163 | 54.545 | 429 | 2.10E-139 | Hybrid non-ribosomal peptide synthetase/Type I polyketide synthase [Burkholderia vietnamiensis] | WP_059454702 |
| KS_498 | 1286 | RHG_cluster_322 | 53.704 | 432 | 2.55E-138 | Type I polyketide synthase, partial [Burkholderia vietnamiensis]                                | WP_059694304 |
| KS_499 | 1094 | RHG_cluster_265 | 73.973 | 365 | 0         | Beta-ketoacyl-[acyl-carrier-protein] synthase II [Rhodothermus marinus]                         | WP_014068140 |
| KS_501 | 1286 | RHG_cluster_204 | 54.419 | 430 | 4.52E-141 | Hybrid non-ribosomal peptide synthetase/Type I polyketide synthase [Burkholderia vietnamiensis] | WP_069223642 |
| KS_506 | 1286 | RHG_cluster_179 | 59.674 | 429 | 2.77E-148 | Type I polyketide synthase [Mycolicibacterium austroafricanum]                                  | WP_105389463 |
| KS_507 | 1286 | RHG_cluster_057 | 52.727 | 440 | 3.19E-138 | Type I polyketide synthase [Mycobacterium sp. IS-1590]                                          | WP_064404744 |
| KS_511 | 1292 | RHG_cluster_090 | 54.63  | 432 | 1.07E-138 | Type I polyketide synthase [Mycolicibacterium komanii]                                          | WP_090277733 |
| KS_516 | 1292 | RHG_cluster_162 | 54.419 | 430 | 1.43E-140 | Type I polyketide synthase, partial [Burkholderia vietnamiensis]                                | WP_059668134 |
| KS_517 | 1220 | RHG_cluster_155 | 63.027 | 403 | 0         | Beta-ketoacyl-[acyl-carrier-protein] synthase II [Albimonas donghaensis]                        | WP_092679786 |
| KS_519 | 1184 | RHG_cluster_065 | 63.265 | 392 | 0         | Beta-ketoacyl-[acyl-carrier-protein] synthase II [Thermodesulfovibrio sp. N1]                   | WP_068860060 |
| KS_520 | 1286 | RHG_cluster_195 | 52.448 | 429 | 6.01E-136 | Type I polyketide synthase, partial [Burkholderia vietnamiensis]                                | WP_059567396 |
| KS_525 | 1286 | RHG_cluster_192 | 54.312 | 429 | 1.21E-143 | Type I polyketide synthase, partial [Burkholderia vietnamiensis]                                | WP_059567396 |
| KS_526 | 1148 | RHG_cluster_103 | 64.491 | 383 | 0         | Beta-ketoacyl-[acyl-carrier-protein] synthase II [Chromatiaceae bacterium 2141T.STBD.0c.01a]    | WP_078119642 |
| KS_529 | 1292 | RHG_cluster_194 | 52.214 | 429 | 1.95E-134 | Hybrid non-ribosomal peptide synthetase/Type I polyketide synthase [Burkholderia vietnamiensis] | WP_059603382 |
| KS_532 | 1286 | RHG_cluster_266 | 57.674 | 430 | 3.20E-151 | Type I polyketide synthase [Mycolicibacterium diernhoferi]                                      | WP_073855454 |
| KS_538 | 1286 | RHG_cluster_160 | 53.756 | 426 | 2.06E-137 | Type I polyketide synthase [Mycolicibacterium austroafricanum]                                  | WP_105389463 |
| KS_541 | 1286 | RHG_cluster_027 | 54.312 | 429 | 5.27E-139 | Type I polyketide synthase, partial [Burkholderia vietnamiensis]                                | WP_059567396 |
| KS_543 | 1286 | RHG_cluster_054 | 53.132 | 431 | 3.70E-136 | Type I polyketide synthase [Mycolicibacterium rhodesiae]                                        | WP_005142704 |

|        |      |                 |        |     |           |                                                                                                 |              |
|--------|------|-----------------|--------|-----|-----------|-------------------------------------------------------------------------------------------------|--------------|
| KS_545 | 1292 | RHG_cluster_242 | 53.846 | 429 | 5.50E-140 | Hybrid non-ribosomal peptide synthetase/Type I polyketide synthase [Burkholderia vietnamiensis] | WP_059740130 |
| KS_548 | 1277 | RHG_cluster_159 | 62.441 | 426 | 4.99E-160 | Type I polyketide synthase [Mycolicibacterium vanbaalenii]                                      | WP_011778276 |
| KS_551 | 1292 | RHG_cluster_147 | 53.613 | 429 | 2.01E-140 | Type I polyketide synthase, partial [Burkholderia vietnamiensis]                                | WP_059567396 |
| KS_553 | 1250 | RHG_cluster_053 | 60.28  | 428 | 4.17E-151 | Type I polyketide synthase [Mycolicibacterium austroafricanum]                                  | WP_105389463 |
| KS_554 | 1283 | RHG_cluster_008 | 60.047 | 428 | 3.16E-150 | Type I polyketide synthase [Mycolicibacterium austroafricanum]                                  | WP_051558318 |
| KS_555 | 1286 | RHG_cluster_177 | 55.349 | 430 | 2.54E-141 | Type I polyketide synthase [Mycolicibacterium tusciae]                                          | WP_006241768 |
| KS_559 | 1301 | RHG_cluster_285 | 58.837 | 430 | 6.44E-146 | Type I polyketide synthase [Mycolicibacterium austroafricanum]                                  | WP_105389463 |
| KS_569 | 1292 | RHG_cluster_238 | 52.995 | 434 | 4.16E-135 | Type I polyketide synthase, partial [Burkholderia vietnamiensis]                                | WP_059694304 |
| KS_570 | 1073 | RHG_cluster_095 | 53.067 | 326 | 4.62E-111 | Beta-ketoacyl-[acyl-carrier-protein] synthase family protein [Rhizobiales bacterium]            | WP_109794138 |
| KS_572 | 1286 | RHG_cluster_288 | 52.668 | 431 | 3.25E-137 | Hybrid non-ribosomal peptide synthetase/Type I polyketide synthase [Burkholderia vietnamiensis] | WP_059991443 |
| KS_573 | 1292 | RHG_cluster_056 | 52.315 | 432 | 5.03E-137 | Type I polyketide synthase, partial [Burkholderia vietnamiensis]                                | WP_059694304 |
| KS_575 | 1067 | RHG_cluster_232 | 60.596 | 302 | 3.34E-118 | Beta-ketoacyl-ACP synthase [Xanthomonas floridensis]                                            | WP_064508482 |
| KS_577 | 1178 | RHG_cluster_046 | 61.675 | 394 | 2.00E-156 | Hypothetical protein [Verminephrobacter aporrectodeae]                                          | WP_081479930 |
| KS_581 | 1010 | RHG_cluster_121 | 53.266 | 199 | 2.08E-62  | Beta-ketoacyl-ACP synthase [Cellvibrio sp. pealriver]                                           | WP_082191725 |
| KS_583 | 1184 | RHG_cluster_134 | 59.836 | 366 | 1.79E-136 | Hypothetical protein [Verminephrobacter aporrectodeae]                                          | WP_081479930 |
| KS_588 | 1016 | RHG_cluster_125 | 67.755 | 245 | 9.71E-107 | Beta-ketoacyl-ACP synthase [Thiobacillus denitrificans]                                         | WP_059752414 |
| KS_593 | 1283 | RHG_cluster_306 | 60.941 | 425 | 5.36E-159 | Type I polyketide synthase [Mycobacterium sp. EPa45]                                            | WP_047332984 |
| KS_596 | 1259 | RHG_cluster_261 | 53.63  | 427 | 6.14E-129 | Type I polyketide synthase [Mycobacterium gordonae]                                             | WP_065161832 |
| KS_599 | 1079 | RHG_cluster_182 | 59.259 | 324 | 1.94E-133 | Beta-ketoacyl synthase [Pseudomonas flexibilis]                                                 | WP_039561123 |
| KS_603 | 851  | RHG_cluster_270 | 70.204 | 245 | 3.12E-119 | Beta-ketoacyl synthase [Vitiosangium sp. GDMCC 1.1324]                                          | WP_108066665 |
| KS_614 | 1259 | RHG_cluster_262 | 54.846 | 423 | 1.02E-140 | Type I polyketide synthase [Mycobacterium asiaticum]                                            | WP_065157110 |
| KS_621 | 1259 | RHG_cluster_208 | 56.44  | 427 | 2.21E-141 | Type I polyketide synthase [Mycolicibacterium tusciae]                                          | WP_006241768 |
| KS_625 | 1262 | RHG_cluster_289 | 55.189 | 424 | 4.52E-136 | Type I polyketide synthase [Mycobacterium sp. 852002-53434 SCH5985345]                          | WP_066952779 |
| KS_627 | 1265 | RHG_cluster_162 | 57.412 | 425 | 6.81E-145 | Type I polyketide synthase [Mycolicibacterium austroafricanum]                                  | WP_051558318 |
| KS_628 | 1277 | RHG_cluster_248 | 55.245 | 429 | 2.64E-140 | Type I polyketide synthase [Mycolicibacterium austroafricanum]                                  | WP_105389463 |
| KS_636 | 1262 | RHG_cluster_119 | 61.412 | 425 | 3.76E-157 | Type I polyketide synthase [Mycolicibacterium austroafricanum]                                  | WP_105389463 |
| KS_638 | 1259 | RHG_cluster_226 | 54.61  | 423 | 5.54E-132 | Type I polyketide synthase [Mycobacterium palustre]                                             | WP_085078235 |
| KS_642 | 713  | RHG_cluster_140 | 71.795 | 234 | 7.44E-100 | Type I polyketide synthase [Mycobacterium malmoense]                                            | WP_065517313 |
| KS_643 | 1256 | RHG_cluster_233 | 61.647 | 425 | 2.67E-156 | Type I polyketide synthase [Mycolicibacterium austroafricanum]                                  | WP_105389463 |
| KS_647 | 1256 | RHG_cluster_229 | 58.156 | 423 | 3.22E-141 | Type I polyketide synthase [Mycolicibacterium austroafricanum]                                  | WP_051558318 |

|        |      |                 |        |     |           |                                                                                             |              |
|--------|------|-----------------|--------|-----|-----------|---------------------------------------------------------------------------------------------|--------------|
| KS_650 | 1235 | RHG_cluster_191 | 58.095 | 420 | 2.17E-137 | Type I polyketide synthase [Mycolicibacterium austroafricanum]                              | WP_105389463 |
| KS_652 | 1259 | RHG_cluster_268 | 55.189 | 424 | 1.12E-137 | Type I polyketide synthase [Mycobacterium sp. GA-1331]                                      | WP_064424921 |
| KS_655 | 1244 | RHG_cluster_203 | 57.569 | 436 | 3.25E-145 | Type I polyketide synthase [Mycolicibacterium austroafricanum]                              | WP_105389463 |
| KS_657 | 1259 | RHG_cluster_140 | 60.142 | 424 | 6.00E-151 | Type I polyketide synthase [Mycolicibacterium austroafricanum]                              | WP_105389463 |
| KS_660 | 1259 | RHG_cluster_197 | 54.907 | 428 | 7.98E-140 | Type I polyketide synthase [Mycobacterium gordonae]                                         | WP_065161832 |
| KS_662 | 1265 | RHG_cluster_062 | 55.529 | 425 | 3.02E-140 | Type I polyketide synthase [Mycobacterium parmense]                                         | WP_085270770 |
| KS_664 | 1277 | RHG_cluster_145 | 58.156 | 423 | 1.10E-144 | Type I polyketide synthase [Mycobacterium sp. IS-1744]                                      | WP_064399965 |
| KS_666 | 1265 | RHG_cluster_246 | 57.412 | 425 | 5.89E-145 | Type I polyketide synthase [Mycobacterium asiaticum]                                        | WP_065120279 |
| KS_668 | 1259 | RHG_cluster_240 | 51.415 | 424 | 1.04E-143 | Type I polyketide synthase [Pleurocapsa minor]                                              | WP_015144800 |
| KS_670 | 1259 | RHG_cluster_014 | 56.206 | 427 | 4.81E-142 | Type I polyketide synthase [Mycobacterium gordonae]                                         | WP_065044175 |
| KS_672 | 1262 | RHG_cluster_198 | 53.505 | 428 | 1.83E-130 | Type I polyketide synthase [Mycolicibacterium vanbaalenii]                                  | WP_011778276 |
| KS_673 | 1268 | RHG_cluster_119 | 62.411 | 423 | 3.97E-160 | Type I polyketide synthase [Mycolicibacterium austroafricanum]                              | WP_105389463 |
| KS_677 | 1259 | RHG_cluster_149 | 56.471 | 425 | 8.66E-139 | Type I polyketide synthase [Mycolicibacterium vanbaalenii]                                  | WP_011778276 |
| KS_679 | 1253 | RHG_cluster_053 | 52.927 | 427 | 8.13E-130 | Type I polyketide synthase [Mycobacterium colombiense]                                      | WP_077092494 |
| KS_682 | 1277 | RHG_cluster_140 | 60.78  | 436 | 8.34E-157 | Type I polyketide synthase [Mycolicibacterium austroafricanum]                              | WP_105389463 |
| KS_685 | 1268 | RHG_cluster_140 | 60.757 | 423 | 2.61E-154 | Type I polyketide synthase [Mycobacterium sp. TBL 1200985]                                  | WP_085324847 |
| KS_689 | 1259 | RHG_cluster_161 | 54.717 | 424 | 1.34E-138 | Type I polyketide synthase [Mycobacterium sp. 1245111.1]                                    | WP_067331050 |
| KS_691 | 1259 | RHG_cluster_164 | 56     | 425 | 4.66E-136 | Type I polyketide synthase [Mycolicibacterium austroafricanum]                              | WP_105389463 |
| KS_692 | 1259 | RHG_cluster_124 | 56.706 | 425 | 4.38E-141 | Type I polyketide synthase [Mycolicibacterium austroafricanum]                              | WP_105389463 |
| KS_693 | 1259 | RHG_cluster_037 | 55.972 | 427 | 4.19E-143 | Type I polyketide synthase [Mycobacterium parmense]                                         | WP_085270770 |
| KS_697 | 1265 | RHG_cluster_165 | 58.156 | 423 | 2.13E-143 | Type I polyketide synthase [Mycolicibacterium austroafricanum]                              | WP_105389463 |
| KS_700 | 1271 | RHG_cluster_019 | 60.757 | 423 | 3.73E-153 | Type I polyketide synthase [Mycobacterium asiaticum]                                        | WP_065146316 |
| KS_704 | 1262 | RHG_cluster_154 | 53.901 | 423 | 6.42E-139 | Type I polyketide synthase [Mycolicibacterium austroafricanum]                              | WP_051558318 |
| KS_707 | 1262 | RHG_cluster_069 | 54.439 | 428 | 3.32E-139 | Type I polyketide synthase [Mycolicibacterium bacteremicum]                                 | WP_083056565 |
| KS_712 | 1259 | RHG_cluster_100 | 57.309 | 431 | 5.25E-142 | Type I polyketide synthase [Mycolicibacterium vanbaalenii]                                  | WP_011778276 |
| KS_714 | 1256 | RHG_cluster_040 | 52.358 | 424 | 1.97E-134 | Type I polyketide synthase [Mycolicibacterium austroafricanum]                              | WP_051558318 |
| KS_715 | 1259 | RHG_cluster_090 | 53.774 | 424 | 4.02E-137 | Type I polyketide synthase [Mycobacterium colombiense]                                      | WP_077092494 |
| KS_719 | 1259 | RHG_cluster_056 | 54.588 | 425 | 7.94E-135 | Type I polyketide synthase [Mycobacterium avium]                                            | WP_062889895 |
| KS_723 | 1256 | RHG_cluster_054 | 55.869 | 426 | 8.93E-140 | Hybrid non-ribosomal peptide synthetase/Type I polyketide synthase [Burkholderia sp. KJ006] | WP_014725946 |
| KS_724 | 1259 | RHG_cluster_057 | 57.176 | 425 | 4.59E-142 | Type I polyketide synthase [Mycolicibacterium austroafricanum]                              | WP_105389463 |
| KS_727 | 1259 | RHG_cluster_179 | 56     | 425 | 4.08E-135 | Type I polyketide synthase [Mycolicibacterium austroafricanum]                              | WP_105389463 |

|        |      |                 |        |     |           |                                                                                             |              |
|--------|------|-----------------|--------|-----|-----------|---------------------------------------------------------------------------------------------|--------------|
| KS_729 | 1265 | RHG_cluster_027 | 56.132 | 424 | 1.84E-134 | Type I polyketide synthase [Mycolicibacterium austroafricanum]                              | WP_105389463 |
| KS_733 | 1262 | RHG_cluster_147 | 54.93  | 426 | 1.37E-138 | Type I polyketide synthase [Mycolicibacterium austroafricanum]                              | WP_051558318 |
| KS_735 | 1124 | RHG_cluster_194 | 54.569 | 383 | 5.67E-122 | Type I polyketide synthase [Mycolicibacterium austroafricanum]                              | WP_105389463 |
| KS_738 | 1277 | RHG_cluster_159 | 61.982 | 434 | 4.74E-161 | Type I polyketide synthase [Mycolicibacterium austroafricanum]                              | WP_105389463 |
| KS_741 | 1259 | RHG_cluster_008 | 55.529 | 425 | 4.25E-142 | Type I polyketide synthase [Mycobacterium colombiense]                                      | WP_076099902 |
| KS_744 | 1262 | RHG_cluster_087 | 51.288 | 427 | 1.14E-126 | Hybrid non-ribosomal peptide synthetase/Type I polyketide synthase [Burkholderia sp. KJ006] | WP_014725946 |
| KS_746 | 1274 | RHG_cluster_177 | 56.206 | 427 | 9.85E-136 | Type I polyketide synthase [Mycolicibacterium vanbaalenii]                                  | WP_011778276 |
| KS_754 | 1262 | RHG_cluster_193 | 61.939 | 423 | 5.53E-157 | Type I polyketide synthase [Mycolicibacterium austroafricanum]                              | WP_105389463 |
| KS_758 | 1250 | RHG_cluster_119 | 59.155 | 426 | 6.74E-151 | Type I polyketide synthase [Mycolicibacterium austroafricanum]                              | WP_105389463 |
| KS_759 | 1268 | RHG_cluster_019 | 60.748 | 428 | 7.57E-152 | Type I polyketide synthase [Mycolicibacterium austroafricanum]                              | WP_105389463 |

Table S13. BLAST search of the KS sequences from the metagenome of *Sphaciospongia* sp. against refseq\_protein database in NCBI

| KS ID  | Length (nt) | BGC ID          | Identity (%) | Alignment length (aa) | E-value   | The homologenus sequences                                                   | Accession number |
|--------|-------------|-----------------|--------------|-----------------------|-----------|-----------------------------------------------------------------------------|------------------|
| KS_002 | 1086        | SPV_cluster_403 | 81.844       | 358                   | 0         | Beta-ketoacyl-[acyl-carrier-protein] synthase II [Thioalkalivibrio sp. HK1] | WP_038098656     |
| KS_003 | 459         | SPV_cluster_447 | 64           | 150                   | 2.39E-56  | Type I polyketide synthase [Mycobacterium shimoidei]                        | WP_069394598     |
| KS_005 | 1266        | SPV_cluster_194 | 42.118       | 425                   | 4.08E-85  | Type I polyketide synthase [Streptomyces rubellomurinus]                    | WP_078860657     |
| KS_008 | 1266        | SPV_cluster_115 | 59.294       | 425                   | 1.35E-143 | Type I polyketide synthase [Mycobacterium celatum]                          | WP_062540382     |
| KS_009 | 663         | SPV_cluster_191 | 66.507       | 209                   | 5.00E-85  | Type I polyketide synthase [Mycobacterium sp. 1137317.9]                    | WP_067320514     |
| KS_015 | 435         | SPV_cluster_422 | 64.336       | 143                   | 1.01E-54  | Type I polyketide synthase, partial [Mycobacterium avium]                   | WP_062887549     |
| KS_017 | 696         | SPV_cluster_454 | 46.789       | 218                   | 2.30E-53  | Polyketide synthase [Verrucomicrobium spinosum]                             | WP_075088152     |
| KS_018 | 1266        | SPV_cluster_241 | 59.207       | 429                   | 1.10E-142 | Type I polyketide synthase [Mycolicibacterium vanbaalenii]                  | WP_011778276     |
| KS_022 | 783         | SPV_cluster_440 | 64.341       | 258                   | 2.44E-99  | Type I polyketide synthase [Mycolicibacterium austroafricanum]              | WP_105389463     |
| KS_023 | 297         | SPV_cluster_287 | 58.333       | 96                    | 7.82E-28  | Type I polyketide synthase [Mycobacterium conspicuum]                       | WP_085233715     |
| KS_024 | 945         | SPV_cluster_405 | 58.741       | 286                   | 9.94E-105 | Type I polyketide synthase [Mycobacterium sp. 1137317.9]                    | WP_067320514     |
| KS_025 | 1221        | SPV_cluster_202 | 56.618       | 408                   | 1.94E-135 | Type I polyketide synthase, partial [Mycobacteroides abscessus]             | WP_079625060     |
| KS_027 | 351         | SPV_cluster_456 | 62.281       | 114                   | 1.04E-39  | Type I polyketide synthase [filamentous cyanobacterium CCP3]                | WP_106919617     |
| KS_031 | 744         | SPV_cluster_302 | 63.415       | 246                   | 8.08E-94  | Type I polyketide synthase [Mycolicibacterium austroafricanum]              | WP_105389463     |
| KS_034 | 1077        | SPV_cluster_360 | 60.446       | 359                   | 6.34E-128 | Type I polyketide synthase [Mycobacterium celatum]                          | WP_062540382     |
| KS_035 | 1014        | SPV_cluster_461 | 67.16        | 338                   | 3.55E-165 | Beta-ketoacyl-[acyl-carrier-protein] synthase II [Balneatrix alpica]        | WP_035461346     |
| KS_038 | 1113        | SPV_cluster_096 | 61.141       | 368                   | 1.35E-137 | Type I polyketide synthase [Mycolicibacterium vanbaalenii]                  | WP_011778276     |
| KS_042 | 669         | SPV_cluster_382 | 68.868       | 212                   | 1.26E-90  | Type I polyketide synthase [Mycobacterium colombiense]                      | WP_075236679     |
| KS_047 | 1113        | SPV_cluster_418 | 57.221       | 367                   | 1.50E-128 | Type I polyketide synthase [Mycolicibacterium austroafricanum]              | WP_105389463     |
| KS_049 | 438         | SPV_cluster_450 | 61.538       | 143                   | 1.67E-52  | Type I polyketide synthase [Mycolicibacterium diernhoferi]                  | WP_073855454     |
| KS_050 | 279         | SPV_cluster_446 | 61.538       | 91                    | 1.02E-29  | Type I polyketide synthase [Nostocales cyanobacterium HT-58-2]              | WP_087541150     |
| KS_051 | 531         | SPV_cluster_451 | 62.573       | 171                   | 1.59E-64  | Type I polyketide synthase [Mycobacterium conspicuum]                       | WP_085235287     |
| KS_055 | 312         | SPV_cluster_391 | 47.475       | 99                    | 6.47E-20  | Type I polyketide synthase, partial [Actinomadura meyeræ]                   | WP_089329605     |
| KS_057 | 849         | SPV_cluster_378 | 61.232       | 276                   | 4.28E-103 | Type I polyketide synthase [Mycobacterium]                                  | WP_029121205     |
| KS_058 | 954         | SPV_cluster_384 | 58.621       | 319                   | 5.36E-110 | Type I polyketide synthase [Mycobacterium]                                  | WP_036463411     |
| KS_059 | 570         | SPV_cluster_455 | 63.978       | 186                   | 5.16E-68  | Type I polyketide synthase [Mycobacterium palustre]                         | WP_085077785     |
| KS_068 | 888         | SPV_cluster_333 | 59.498       | 279                   | 1.94E-101 | Type I polyketide synthase, partial [Burkholderia vietnamiensis]            | WP_059895285     |
| KS_070 | 1023        | SPV_cluster_408 | 68.373       | 332                   | 3.12E-170 | Beta-ketoacyl synthase [marine gamma proteobacterium HTCC2148]              | WP_007229230     |
| KS_072 | 912         | SPV_cluster_428 | 66.784       | 283                   | 6.20E-115 | Type I polyketide synthase [Mycolicibacterium austroafricanum]              | WP_105389463     |

|        |      |                 |        |     |           |                                                                                             |              |
|--------|------|-----------------|--------|-----|-----------|---------------------------------------------------------------------------------------------|--------------|
| KS_076 | 713  | SPV_cluster_204 | 48.182 | 220 | 8.63E-55  | Type I polyketide synthase [Chondromyces crocatus]                                          | WP_063796357 |
| KS_081 | 1118 | SPV_cluster_373 | 58.839 | 379 | 1.05E-129 | Type I polyketide synthase [Mycolicibacterium vanbaalenii]                                  | WP_011778276 |
| KS_082 | 1166 | SPV_cluster_273 | 59.452 | 365 | 1.00E-129 | Type I polyketide synthase [Mycolicibacterium austroafricanum]                              | WP_051558318 |
| KS_085 | 1112 | SPV_cluster_396 | 56.757 | 370 | 1.60E-127 | Type I polyketide synthase [Mycobacterium sp. 852002-30065 SCH5024008]                      | WP_067203355 |
| KS_086 | 671  | SPV_cluster_323 | 61.972 | 213 | 2.42E-82  | Type I polyketide synthase [Mycobacterium asiaticum]                                        | WP_065157110 |
| KS_087 | 1097 | SPV_cluster_425 | 55.342 | 365 | 4.57E-126 | Type I polyketide synthase, partial [Burkholderia vietnamiensis]                            | WP_059668134 |
| KS_089 | 929  | SPV_cluster_347 | 67.491 | 283 | 2.30E-116 | Type I polyketide synthase [Mycolicibacterium vanbaalenii]                                  | WP_011778276 |
| KS_090 | 398  | SPV_cluster_386 | 53.383 | 133 | 6.15E-32  | Type I polyketide synthase [Nocardiopsis sp. NRRL B-16309]                                  | WP_053618745 |
| KS_092 | 1133 | SPV_cluster_423 | 60.212 | 377 | 2.59E-168 | Beta-ketoacyl-[acyl-carrier-protein] synthase II [Dehalobacterium formicoaceticum]          | WP_089609693 |
| KS_093 | 1085 | SPV_cluster_279 | 69.806 | 361 | 2.22E-177 | Beta-ketoacyl-[acyl-carrier-protein] synthase II [Solibacteres bacterium SbA2]              | WP_105314403 |
| KS_097 | 914  | SPV_cluster_292 | 58.974 | 273 | 4.94E-99  | Type I polyketide synthase [Mycobacterium sp. 1554424.7]                                    | WP_066930359 |
| KS_099 | 1061 | SPV_cluster_262 | 51.695 | 354 | 3.12E-115 | Beta-ketoacyl-[acyl-carrier-protein] synthase II [Desulfotomaculum acetoxidans]             | WP_015756782 |
| KS_100 | 1292 | SPV_cluster_356 | 40.46  | 435 | 3.86E-86  | Type I polyketide synthase [Streptomyces sp. WMMB 714]                                      | WP_045862080 |
| KS_114 | 1043 | SPV_cluster_318 | 74.203 | 345 | 0         | Beta-ketoacyl-ACP synthase I [Neptuniibacter pectenicola]                                   | WP_067983865 |
| KS_118 | 1223 | SPV_cluster_209 | 59.705 | 407 | 1.01E-176 | Beta-ketoacyl-[acyl-carrier-protein] synthase II [Clostridiisalibacter paucivorans]         | WP_026893881 |
| KS_119 | 1199 | SPV_cluster_043 | 67.506 | 397 | 0         | Beta-ketoacyl-[acyl-carrier-protein] synthase family protein [Halocynthiibacter namhaensis] | WP_039018003 |
| KS_121 | 1223 | SPV_cluster_417 | 60.934 | 407 | 0         | Beta-ketoacyl-[acyl-carrier-protein] synthase II [Brevibacillus borstelensis]               | WP_003386033 |
| KS_122 | 1184 | SPV_cluster_401 | 75.949 | 395 | 0         | Beta-ketoacyl-ACP synthase I [Methylarcula marina]                                          | WP_106692425 |
| KS_123 | 1223 | SPV_cluster_099 | 74.138 | 406 | 0         | Beta-ketoacyl-[acyl-carrier-protein] synthase II [Thioalkalivibrio sp. HK1]                 | WP_038098656 |
| KS_124 | 1202 | SPV_cluster_375 | 67.419 | 399 | 0         | Beta-ketoacyl-ACP synthase I [Methylomarinum vadi]                                          | WP_031432763 |
| KS_125 | 1250 | SPV_cluster_160 | 73.366 | 413 | 0         | Beta-ketoacyl-[acyl-carrier-protein] synthase II [Rhodospirillales bacterium URHD0088]      | WP_027300572 |
| KS_127 | 1205 | SPV_cluster_228 | 96.02  | 402 | 0         | Beta-ketoacyl-ACP synthase I [Rhodospirillaceae bacterium Spongia-Bin9]                     | WP_108794197 |
| KS_128 | 1223 | SPV_cluster_054 | 60.197 | 407 | 3.85E-180 | Beta-ketoacyl-[acyl-carrier-protein] synthase II [Brevibacillus borstelensis]               | WP_003386033 |
| KS_129 | 1223 | SPV_cluster_033 | 58.824 | 408 | 3.39E-179 | Beta-ketoacyl-[acyl-carrier-protein] synthase II [Risunbinella massiliensis]                | WP_044642594 |
| KS_132 | 1196 | SPV_cluster_416 | 67.839 | 398 | 0         | Beta-ketoacyl-ACP synthase I [Halomonas sp. HL-48]                                          | WP_027337473 |
| KS_133 | 998  | SPV_cluster_358 | 67.164 | 335 | 3.62E-165 | Beta-ketoacyl-[acyl-carrier-protein] synthase II [Caldilinea aerophila]                     | WP_044276402 |
| KS_136 | 1223 | SPV_cluster_324 | 59.705 | 407 | 0         | Beta-ketoacyl-[acyl-carrier-protein] synthase II [Risunbinella]                             | WP_044642594 |



|        |      |                 |        |     |           |                                                                                        |              |
|--------|------|-----------------|--------|-----|-----------|----------------------------------------------------------------------------------------|--------------|
|        |      |                 |        |     |           | massiliensis]                                                                          |              |
| KS_139 | 1202 | SPV_cluster_293 | 71.859 | 398 | 0         | Beta-ketoacyl-ACP synthase I [Salinicola sp. MIT1003]                                  | WP_071230737 |
| KS_141 | 1211 | SPV_cluster_230 | 78.5   | 400 | 0         | Beta-ketoacyl-ACP synthase I [Paracoccus sphaerophysae]                                | WP_036717493 |
| KS_145 | 1256 | SPV_cluster_074 | 70.12  | 415 | 0         | Beta-ketoacyl-[acyl-carrier-protein] synthase II [alpha proteobacterium BAL199]        | WP_040746409 |
| KS_147 | 1208 | SPV_cluster_155 | 75.25  | 400 | 0         | Beta-ketoacyl-ACP synthase I [Inquilinus limosus]                                      | WP_026872496 |
| KS_149 | 1223 | SPV_cluster_076 | 81.773 | 406 | 0         | Beta-ketoacyl-[acyl-carrier-protein] synthase II [Thioalkalivibrio sp. HK1]            | WP_038098656 |
| KS_152 | 1226 | SPV_cluster_251 | 54.902 | 408 | 4.48E-172 | Beta-ketoacyl-[acyl-carrier-protein] synthase II [Spirochaeta lutea]                   | WP_037548043 |
| KS_155 | 1058 | SPV_cluster_438 | 67.898 | 352 | 1.23E-177 | Beta-ketoacyl-ACP synthase I [Beggiatoa alba]                                          | WP_002683102 |
| KS_156 | 1100 | SPV_cluster_349 | 61.538 | 364 | 6.12E-161 | Beta-ketoacyl-[acyl-carrier-protein] synthase II [Spirochaeta lutea]                   | WP_037548043 |
| KS_157 | 1223 | SPV_cluster_032 | 66.422 | 408 | 0         | Beta-ketoacyl-[acyl-carrier-protein] synthase II [Pyrinomonas methylaliphatogenes]     | WP_041976954 |
| KS_158 | 1220 | SPV_cluster_233 | 52.854 | 403 | 1.91E-141 | Beta-ketoacyl-[acyl-carrier-protein] synthase family protein [Nibrificoccus aquaticus] | WP_096057284 |
| KS_160 | 1286 | SPV_cluster_245 | 57.71  | 428 | 3.29E-146 | Type I polyketide synthase [Mycolicibacterium vanbaalenii]                             | WP_011778276 |
| KS_164 | 1223 | SPV_cluster_329 | 66.667 | 408 | 0         | Beta-ketoacyl-[acyl-carrier-protein] synthase II [Pyrinomonas methylaliphatogenes]     | WP_041976954 |
| KS_165 | 1223 | SPV_cluster_039 | 57.248 | 407 | 3.69E-179 | Beta-ketoacyl-[acyl-carrier-protein] synthase II [Planifilum fimeticola]               | WP_106344983 |
| KS_168 | 1223 | SPV_cluster_002 | 64.039 | 406 | 0         | Beta-ketoacyl-[acyl-carrier-protein] synthase II [Moorella humiferrea]                 | WP_106006374 |
| KS_169 | 1253 | SPV_cluster_413 | 55.66  | 424 | 1.22E-141 | Type I polyketide synthase [Mycolicibacterium austroafricanum]                         | WP_051558318 |
| KS_171 | 1223 | SPV_cluster_235 | 69.779 | 407 | 0         | Beta-ketoacyl-[acyl-carrier-protein] synthase II [Solibacteres bacterium SbA2]         | WP_105314403 |
| KS_172 | 1229 | SPV_cluster_014 | 57.805 | 410 | 5.53E-170 | Beta-ketoacyl-[acyl-carrier-protein] synthase II [Numidum massiliense]                 | WP_054949919 |
| KS_177 | 1292 | SPV_cluster_421 | 42.529 | 435 | 5.09E-87  | Type I polyketide synthase [Nocardiopsis sp. NRRL B-16309]                             | WP_053618745 |
| KS_180 | 1028 | SPV_cluster_432 | 65.116 | 344 | 3.10E-153 | Beta-ketoacyl-[acyl-carrier-protein] synthase II [Thermoflexus hugenholtzii]           | WP_098504503 |
| KS_184 | 1217 | SPV_cluster_430 | 57.778 | 405 | 2.78E-174 | Beta-ketoacyl-[acyl-carrier-protein] synthase II [Bacillales]                          | WP_029100165 |
| KS_185 | 1052 | SPV_cluster_411 | 52.454 | 326 | 2.19E-109 | Beta-ketoacyl-[acyl-carrier-protein] synthase family protein [Rhizobiales bacterium]   | WP_109794138 |
| KS_187 | 1223 | SPV_cluster_254 | 65.517 | 406 | 0         | Beta-ketoacyl-[acyl-carrier-protein] synthase II [Dyella]                              | WP_026634449 |
| KS_190 | 1223 | SPV_cluster_284 | 67.801 | 382 | 0         | Beta-ketoacyl-[acyl-carrier-protein] synthase II [Oceanicoccus sagamiensis]            | WP_085759718 |
| KS_192 | 1202 | SPV_cluster_138 | 61.443 | 402 | 1.14E-176 | Beta-ketoacyl-ACP synthase [Pseudoduganella violaceinigra]                             | WP_028104973 |
| KS_194 | 1229 | SPV_cluster_317 | 54.39  | 410 | 2.49E-144 | Beta-ketoacyl-[acyl-carrier-protein] synthase II [Alicyclobacillus macrosporangiidus]  | WP_074950143 |
| KS_200 | 1223 | SPV_cluster_258 | 64.691 | 405 | 0         | Beta-ketoacyl-[acyl-carrier-protein] synthase II [Pyrinomonas methylaliphatogenes]     | WP_041976954 |

|        |      |                 |        |     |           |                                                                                         |              |
|--------|------|-----------------|--------|-----|-----------|-----------------------------------------------------------------------------------------|--------------|
| KS_207 | 1223 | SPV_cluster_389 | 74.278 | 381 | 0         | Beta-ketoacyl-[acyl-carrier-protein] synthase II [Thioalkalivibrio sp. HK1]             | WP_038098656 |
| KS_209 | 1220 | SPV_cluster_128 | 65.356 | 407 | 0         | Beta-ketoacyl-[acyl-carrier-protein] synthase II [Halomonas pantelleriensis]            | WP_089658562 |
| KS_210 | 1214 | SPV_cluster_009 | 63.793 | 406 | 0         | Beta-ketoacyl-[acyl-carrier-protein] synthase II [Reinekea blandensis]                  | WP_008043526 |
| KS_211 | 1340 | SPV_cluster_001 | 52.954 | 457 | 4.05E-139 | Type I Polyketide synthase [Chondromyces crocatus]                                      | WP_082362498 |
| KS_213 | 1229 | SPV_cluster_441 | 54.657 | 408 | 2.92E-165 | Beta-ketoacyl-[acyl-carrier-protein] synthase II [Spirochaeta lutea]                    | WP_037548043 |
| KS_214 | 1223 | SPV_cluster_289 | 63.951 | 405 | 0         | Beta-ketoacyl-[acyl-carrier-protein] synthase II [Woeseia oceani]                       | WP_068615706 |
| KS_215 | 1214 | SPV_cluster_239 | 71.921 | 406 | 4.31E-180 | Beta-ketoacyl-[acyl-carrier-protein] synthase II [Thermoflexus hugenholtzii]            | WP_098504331 |
| KS_216 | 1226 | SPV_cluster_003 | 61.425 | 407 | 2.27E-179 | Beta-ketoacyl-[acyl-carrier-protein] synthase II [Pseudomonas abyssi]                   | WP_096004673 |
| KS_219 | 1199 | SPV_cluster_148 | 72.475 | 396 | 0         | Beta-ketoacyl-[acyl-carrier-protein] synthase family protein [Rhodovulum sulfidophilum] | WP_075786012 |
| KS_226 | 1157 | SPV_cluster_086 | 54.45  | 382 | 4.06E-134 | Beta-ketoacyl-ACP synthase II [Ferrimicrobium acidiphilum]                              | WP_052566261 |
| KS_228 | 1223 | SPV_cluster_195 | 50.735 | 408 | 1.55E-145 | Beta-ketoacyl-[acyl-carrier-protein] synthase II [Effusibacillus pohliae]               | WP_026174345 |
| KS_229 | 1217 | SPV_cluster_280 | 64.461 | 408 | 0         | Beta-ketoacyl-[acyl-carrier-protein] synthase II [Acidihalobacter prosperus]            | WP_038086398 |
| KS_230 | 1223 | SPV_cluster_037 | 71.253 | 407 | 0         | Beta-ketoacyl-[acyl-carrier-protein] synthase II [Ectothiorhodospira haloalkaliphila]   | WP_025281708 |
| KS_233 | 1217 | SPV_cluster_060 | 65.926 | 405 | 0         | Beta-ketoacyl-[acyl-carrier-protein] synthase II [Acidihalobacter ferrooxidans]         | WP_076837285 |
| KS_234 | 1217 | SPV_cluster_121 | 64.706 | 408 | 0         | Beta-ketoacyl-[acyl-carrier-protein] synthase II [Acidihalobacter prosperus]            | WP_038086398 |
| KS_238 | 1217 | SPV_cluster_180 | 58.519 | 405 | 4.55E-177 | Beta-ketoacyl-[acyl-carrier-protein] synthase II [Bacillales]                           | WP_029100165 |
| KS_241 | 1163 | SPV_cluster_207 | 63.089 | 382 | 0         | Beta-ketoacyl-[acyl-carrier-protein] synthase II [Pseudomonas pachastrellae]            | WP_083725910 |
| KS_242 | 1226 | SPV_cluster_445 | 61.916 | 407 | 0         | Beta-ketoacyl-[acyl-carrier-protein] synthase II [Pseudomonas pachastrellae]            | WP_083725910 |
| KS_243 | 1217 | SPV_cluster_015 | 64.109 | 404 | 0         | Beta-ketoacyl-[acyl-carrier-protein] synthase II [Pseudomonas pachastrellae]            | WP_083725910 |
| KS_245 | 1235 | SPV_cluster_178 | 69.082 | 414 | 0         | Beta-ketoacyl-[acyl-carrier-protein] synthase II [Albidovulum xiamenense]               | WP_092498652 |
| KS_246 | 1187 | SPV_cluster_126 | 50.598 | 251 | 1.10E-71  | Beta-ketoacyl-[acyl-carrier-protein] synthase family protein [Legionella drozanskii]    | WP_058494995 |
| KS_248 | 1220 | SPV_cluster_197 | 65.111 | 407 | 0         | Beta-ketoacyl-[acyl-carrier-protein] synthase II [Halomonas halodenitrificans]          | WP_027960955 |
| KS_251 | 1247 | SPV_cluster_101 | 71.117 | 412 | 0         | Beta-ketoacyl-[acyl-carrier-protein] synthase II [Rhodospirillales bacterium URHD0088]  | WP_027300572 |
| KS_255 | 1229 | SPV_cluster_222 | 62.347 | 409 | 0         | Beta-ketoacyl-[acyl-carrier-protein] synthase II [Nitrosomonas aestuarii]               | WP_090702733 |
| KS_257 | 1292 | SPV_cluster_426 | 42.299 | 435 | 3.14E-87  | Type I polyketide synthase, partial [Streptomyces sp. SM5]                              | WP_103492552 |
| KS_258 | 1220 | SPV_cluster_036 | 53.35  | 403 | 2.98E-137 | Beta-ketoacyl-[acyl-carrier-protein] synthase family protein                            | WP_096057284 |

|        |      |                 |        |     |           |                                                                                                 |              |
|--------|------|-----------------|--------|-----|-----------|-------------------------------------------------------------------------------------------------|--------------|
|        |      |                 |        |     |           | [Nribriococcus aquaticus]                                                                       |              |
| KS_260 | 1226 | SPV_cluster_419 | 61.029 | 408 | 0         | Beta-ketoacyl-[acyl-carrier-protein] synthase II [Aneurinibacillus terranovensis]               | WP_027414564 |
| KS_265 | 1292 | SPV_cluster_091 | 44.749 | 438 | 6.24E-94  | Type I polyketide synthase [Sciscionella marina]                                                | WP_020497474 |
| KS_268 | 1292 | SPV_cluster_172 | 42.257 | 452 | 7.20E-92  | Type I polyketide synthase [Sciscionella marina]                                                | WP_020497474 |
| KS_271 | 1220 | SPV_cluster_255 | 63.793 | 406 | 0         | Beta-ketoacyl-[acyl-carrier-protein] synthase II [Thermoanaerobaculum aquaticum]                | WP_038046901 |
| KS_272 | 1286 | SPV_cluster_005 | 52.174 | 437 | 1.11E-136 | Hybrid non-ribosomal peptide synthetase/Type I polyketide synthase [Burkholderia vietnamiensis] | WP_059991443 |
| KS_273 | 1220 | SPV_cluster_025 | 63.054 | 406 | 0         | Beta-ketoacyl-[acyl-carrier-protein] synthase II [Thermoanaerobaculum aquaticum]                | WP_038046901 |
| KS_274 | 1226 | SPV_cluster_024 | 60.294 | 408 | 0         | Beta-ketoacyl-[acyl-carrier-protein] synthase II [Vulcanibacillus modesticaldus]                | WP_069655673 |
| KS_275 | 1229 | SPV_cluster_031 | 56.829 | 410 | 7.38E-163 | Beta-ketoacyl-[acyl-carrier-protein] synthase II [Rhodothermus marinus]                         | WP_012845172 |
| KS_276 | 1223 | SPV_cluster_217 | 72.861 | 409 | 0         | Beta-ketoacyl-[acyl-carrier-protein] synthase II [Thiothrix caldifontis]                        | WP_093066550 |
| KS_277 | 1151 | SPV_cluster_129 | 58.377 | 382 | 1.34E-141 | Beta-ketoacyl-ACP synthase II [Streptomyces sp. NRRL F-2664]                                    | WP_030765373 |
| KS_280 | 1151 | SPV_cluster_229 | 33.995 | 403 | 3.01E-55  | Beta-ketoacyl-[acyl-carrier-protein] synthase II [Synechococcus]                                | WP_011243296 |
| KS_281 | 1292 | SPV_cluster_035 | 54.318 | 440 | 2.71E-138 | Type I polyketide synthase [Mycolicibacter icosiumassiliensis]                                  | WP_078058707 |
| KS_282 | 1226 | SPV_cluster_159 | 61.975 | 405 | 1.76E-173 | Beta-ketoacyl-[acyl-carrier-protein] synthase II [Thermoflexus hugenholtzii]                    | WP_098502948 |
| KS_286 | 1229 | SPV_cluster_402 | 55.774 | 407 | 6.45E-159 | Beta-ketoacyl-[acyl-carrier-protein] synthase II [Desulfotomaculum acetoxidans]                 | WP_015756782 |
| KS_287 | 1289 | SPV_cluster_214 | 50.465 | 430 | 1.77E-132 | Type I polyketide synthase [Mycobacterium bohemicum]                                            | WP_085180210 |
| KS_288 | 1289 | SPV_cluster_040 | 50.698 | 430 | 2.39E-132 | Type I polyketide synthase [Mycobacterium bohemicum]                                            | WP_085180210 |
| KS_289 | 1286 | SPV_cluster_225 | 63.593 | 423 | 3.69E-180 | Type I polyketide synthase [Marinobacterium profundum]                                          | WP_067295857 |
| KS_291 | 1223 | SPV_cluster_107 | 65.517 | 406 | 0         | Beta-ketoacyl-[acyl-carrier-protein] synthase II [Geobacter sp. DSM 2909]                       | WP_108103150 |
| KS_293 | 1292 | SPV_cluster_161 | 41.136 | 440 | 2.37E-87  | Type I polyketide synthase [Crossiella equi]                                                    | WP_086785133 |
| KS_297 | 1214 | SPV_cluster_085 | 55.693 | 404 | 3.80E-155 | Beta-ketoacyl-[acyl-carrier-protein] synthase II [Thermorudis peleae]                           | WP_038037697 |
| KS_301 | 1154 | SPV_cluster_093 | 53.786 | 383 | 2.20E-131 | Hypothetical protein [Tropicibacter phthalicus]                                                 | WP_099241578 |
| KS_303 | 1286 | SPV_cluster_084 | 55.374 | 428 | 2.61E-149 | Acyltransferase domain-containing protein [Nostoc commune]                                      | WP_109009597 |
| KS_305 | 1067 | SPV_cluster_406 | 55.12  | 332 | 3.72E-113 | Beta-ketoacyl-[acyl-carrier-protein] synthase II [Roseiflexus castenholzii]                     | WP_041330400 |
| KS_306 | 1286 | SPV_cluster_268 | 52.644 | 435 | 4.67E-136 | Type I polyketide synthase, partial [Burkholderia vietnamiensis]                                | WP_059668134 |
| KS_307 | 1259 | SPV_cluster_312 | 59.905 | 419 | 1.89E-177 | Beta-ketoacyl-[acyl-carrier-protein] synthase family protein [Syntrophus aciditrophicus]        | WP_011418884 |
| KS_308 | 1154 | SPV_cluster_124 | 51.558 | 353 | 4.76E-110 | Hypothetical protein [Tropicibacter phthalicus]                                                 | WP_099241578 |
| KS_310 | 1223 | SPV_cluster_400 | 60.197 | 407 | 0         | Beta-ketoacyl-[acyl-carrier-protein] synthase II [Kroppenstedtia]                               | WP_076523249 |

|        |      |                 |        |     |           |                                                                                 |              |
|--------|------|-----------------|--------|-----|-----------|---------------------------------------------------------------------------------|--------------|
|        |      |                 |        |     |           | eburnea]                                                                        |              |
| KS_312 | 1160 | SPV_cluster_113 | 60.807 | 347 | 1.90E-131 | Beta-ketoacyl-ACP synthase II [Streptomyces katrae]                             | WP_045950542 |
| KS_315 | 1160 | SPV_cluster_320 | 62.141 | 383 | 3.80E-147 | Beta-ketoacyl-ACP synthase II [Streptomyces katrae]                             | WP_045950542 |
| KS_317 | 1160 | SPV_cluster_224 | 61.96  | 347 | 3.80E-133 | Beta-ketoacyl-ACP synthase II [Streptomyces katrae]                             | WP_045950542 |
| KS_321 | 1217 | SPV_cluster_081 | 54.455 | 404 | 4.36E-154 | Beta-ketoacyl-[acyl-carrier-protein] synthase II [Thermomicrobium roseum]       | WP_012642981 |
| KS_323 | 1286 | SPV_cluster_253 | 53.472 | 432 | 1.67E-138 | Type I polyketide synthase, partial [Burkholderia vietnamiensis]                | WP_059668134 |
| KS_326 | 1223 | SPV_cluster_353 | 57.843 | 408 | 1.63E-169 | Beta-ketoacyl-[acyl-carrier-protein] synthase II [Alicyclobacillus sendaiensis] | WP_062309646 |
| KS_332 | 1286 | SPV_cluster_171 | 53.563 | 435 | 7.50E-139 | Type I polyketide synthase, partial [Burkholderia vietnamiensis]                | WP_059895285 |
| KS_336 | 1292 | SPV_cluster_163 | 43.119 | 436 | 1.02E-93  | SDR family NAD(P)-dependent oxidoreductase [Burkholderia cenocepacia]           | WP_109341745 |
| KS_337 | 1292 | SPV_cluster_153 | 44.138 | 435 | 6.00E-89  | Type I polyketide synthase [Streptomyces rubellomurinus]                        | WP_078860657 |
| KS_339 | 1292 | SPV_cluster_310 | 42.166 | 434 | 3.47E-88  | SDR family NAD(P)-dependent oxidoreductase [Burkholderia cenocepacia]           | WP_109341745 |
| KS_341 | 1226 | SPV_cluster_276 | 60.784 | 408 | 3.48E-169 | Beta-ketoacyl-[acyl-carrier-protein] synthase II [Thermoflexus hugenholtzii]    | WP_098502948 |
| KS_345 | 1154 | SPV_cluster_290 | 58.398 | 387 | 1.23E-128 | Beta-ketoacyl-ACP synthase II [Ilumatobacter nonamiensis]                       | WP_040493091 |
| KS_349 | 1247 | SPV_cluster_205 | 72.222 | 414 | 0         | Beta-ketoacyl-[acyl-carrier-protein] synthase II [Tistrella mobilis]            | WP_062765245 |
| KS_350 | 1292 | SPV_cluster_300 | 40.23  | 435 | 1.37E-85  | Type I polyketide synthase [Streptomyces sp. WMMB 714]                          | WP_045862080 |
| KS_351 | 1148 | SPV_cluster_436 | 71.316 | 380 | 0         | Beta-ketoacyl-[acyl-carrier-protein] synthase II [Oceanibaculum pacificum]      | WP_067553414 |
| KS_353 | 1292 | SPV_cluster_108 | 44.545 | 440 | 6.87E-96  | Type I polyketide synthase [Sciscionella marina]                                | WP_020497474 |
| KS_356 | 1292 | SPV_cluster_166 | 39.066 | 407 | 6.07E-79  | Type I polyketide synthase [Stigmatella erecta]                                 | WP_093522399 |
| KS_357 | 1292 | SPV_cluster_281 | 40.183 | 438 | 2.83E-85  | Type I polyketide synthase [Vulcanococcus limneticus]                           | WP_094591717 |
| KS_360 | 1232 | SPV_cluster_192 | 70.244 | 410 | 0         | Beta-ketoacyl-[acyl-carrier-protein] synthase II [Rhodothermus marinus]         | WP_014068140 |
| KS_361 | 1292 | SPV_cluster_065 | 39.723 | 433 | 5.71E-80  | Type I polyketide synthase [Burkholderia thailandensis]                         | WP_038712449 |
| KS_362 | 1220 | SPV_cluster_271 | 66.256 | 406 | 0         | Beta-ketoacyl-[acyl-carrier-protein] synthase II [Opitutaceae bacterium EW11]   | WP_107743231 |
| KS_363 | 1220 | SPV_cluster_045 | 52.826 | 407 | 3.49E-158 | Beta-ketoacyl-[acyl-carrier-protein] synthase II [Bacillus methanolicus]        | WP_004433597 |
| KS_369 | 1229 | SPV_cluster_007 | 58.68  | 409 | 5.74E-165 | Beta-ketoacyl-[acyl-carrier-protein] synthase II [Desulfovibrio thermocuniculi] | WP_027718279 |
| KS_370 | 1100 | SPV_cluster_112 | 48.221 | 253 | 1.18E-58  | 3-oxoacyl-ACP synthase [Lechevalieria fradiae]                                  | WP_090045424 |
| KS_371 | 1298 | SPV_cluster_141 | 42.759 | 435 | 3.75E-87  | Type I polyketide synthase [Streptomyces]                                       | WP_030626723 |
| KS_378 | 1223 | SPV_cluster_363 | 56.479 | 409 | 1.26E-163 | Beta-ketoacyl-[acyl-carrier-protein] synthase II [Chloroflexus sp. MS-G]        | WP_031461218 |
| KS_379 | 1253 | SPV_cluster_362 | 72.837 | 416 | 0         | Beta-ketoacyl-[acyl-carrier-protein] synthase II [Tistrella mobilis]            | WP_062765245 |

|        |      |                 |        |     |           |                                                                                         |              |
|--------|------|-----------------|--------|-----|-----------|-----------------------------------------------------------------------------------------|--------------|
| KS_381 | 1229 | SPV_cluster_367 | 56.127 | 408 | 4.56E-159 | Beta-ketoacyl-[acyl-carrier-protein] synthase II [Thermaerobacter subterraneus]         | WP_006905000 |
| KS_383 | 1220 | SPV_cluster_027 | 73.515 | 404 | 0         | Beta-ketoacyl-[acyl-carrier-protein] synthase II [Candidatus Nitrospira nitrosa]        | WP_090746581 |
| KS_385 | 1229 | SPV_cluster_341 | 56.098 | 410 | 7.70E-159 | Beta-ketoacyl-[acyl-carrier-protein] synthase II [Melghirimyces profundicolus]          | WP_108022554 |
| KS_386 | 1232 | SPV_cluster_173 | 69.756 | 410 | 0         | Beta-ketoacyl-[acyl-carrier-protein] synthase II [Rhodothermus marinus]                 | WP_014068140 |
| KS_389 | 1247 | SPV_cluster_042 | 69.976 | 413 | 0         | Beta-ketoacyl-[acyl-carrier-protein] synthase II [Rhodospirillales bacterium URHD0088]  | WP_027300572 |
| KS_391 | 1154 | SPV_cluster_442 | 71.99  | 382 | 0         | Beta-ketoacyl-[acyl-carrier-protein] synthase II [Thermoflexus hugenholtzii]            | WP_098502948 |
| KS_394 | 1226 | SPV_cluster_053 | 48.905 | 411 | 9.42E-134 | Beta-ketoacyl-[acyl-carrier-protein] synthase II [Ardenticatena maritima]               | WP_054491905 |
| KS_399 | 1286 | SPV_cluster_057 | 56.744 | 430 | 4.55E-139 | Type I polyketide synthase [Mycolicibacterium austroafricanum]                          | WP_105389463 |
| KS_401 | 1184 | SPV_cluster_125 | 60.204 | 392 | 1.50E-169 | Beta-ketoacyl-[acyl-carrier-protein] synthase family protein [Pseudovibrio sp. AU243]   | WP_109314797 |
| KS_402 | 1184 | SPV_cluster_092 | 63.52  | 392 | 2.15E-171 | Beta-ketoacyl-[acyl-carrier-protein] synthase family protein [Tropicibacter phthalicus] | WP_099241574 |
| KS_404 | 1223 | SPV_cluster_275 | 51.106 | 407 | 6.81E-143 | Beta-ketoacyl-[acyl-carrier-protein] synthase II [Ardenticatena maritima]               | WP_054493616 |
| KS_405 | 1292 | SPV_cluster_049 | 43.333 | 450 | 2.20E-93  | Type I polyketide synthase [Sciscionella marina]                                        | WP_020497474 |
| KS_409 | 1292 | SPV_cluster_067 | 41.907 | 451 | 6.03E-93  | Type I polyketide synthase [Sciscionella marina]                                        | WP_020497474 |
| KS_415 | 1232 | SPV_cluster_308 | 46.341 | 410 | 6.62E-134 | Beta-ketoacyl-[acyl-carrier-protein] synthase II [Vulcanibacillus modesticaldus]        | WP_069655673 |
| KS_416 | 1286 | SPV_cluster_168 | 59.207 | 429 | 2.35E-148 | Type I polyketide synthase [Mycolicibacterium austroafricanum]                          | WP_105389463 |
| KS_418 | 1088 | SPV_cluster_444 | 57.576 | 363 | 1.22E-151 | Beta-ketoacyl-[acyl-carrier-protein] synthase II [Desulfuribacillus stibiiarsenatis]    | WP_069701864 |
| KS_420 | 1286 | SPV_cluster_371 | 55.478 | 429 | 3.09E-140 | Type I polyketide synthase [Mycobacterium]                                              | WP_041309443 |
| KS_422 | 1286 | SPV_cluster_149 | 52.204 | 431 | 5.25E-134 | Type I polyketide synthase, partial [Burkholderia vietnamiensis]                        | WP_059694304 |
| KS_425 | 1232 | SPV_cluster_201 | 70     | 410 | 0         | Beta-ketoacyl-[acyl-carrier-protein] synthase II [Caldilinea aerophila]                 | WP_044276164 |
| KS_426 | 1211 | SPV_cluster_339 | 73.367 | 398 | 0         | Beta-ketoacyl-[acyl-carrier-protein] synthase II [Rhodospirillales bacterium URHD0088]  | WP_027300572 |
| KS_427 | 1175 | SPV_cluster_215 | 57.682 | 371 | 1.69E-150 | Beta-ketoacyl-[acyl-carrier-protein] synthase II [Thermomicrobium roseum]               | WP_012642981 |
| KS_432 | 1286 | SPV_cluster_146 | 54.861 | 432 | 3.55E-141 | Type I polyketide synthase, partial [Burkholderia vietnamiensis]                        | WP_059895285 |
| KS_433 | 1175 | SPV_cluster_307 | 56.065 | 371 | 2.71E-148 | Beta-ketoacyl-[acyl-carrier-protein] synthase II [Thermomicrobium roseum]               | WP_012642981 |
| KS_434 | 1223 | SPV_cluster_340 | 56.436 | 404 | 4.91E-163 | Beta-ketoacyl-[acyl-carrier-protein] synthase II [Desulfotomaculum acetoxidans]         | WP_015756782 |
| KS_435 | 1094 | SPV_cluster_345 | 30.699 | 329 | 3.91E-45  | Hypothetical protein [Flavobacterium aurantiibacter]                                    | WP_094485954 |
| KS_436 | 1232 | SPV_cluster_216 | 48.78  | 410 | 3.04E-131 | Beta-ketoacyl-[acyl-carrier-protein] synthase II [Bacillus oleivorans]                  | WP_097159866 |

|        |      |                 |        |     |           |                                                                                             |              |
|--------|------|-----------------|--------|-----|-----------|---------------------------------------------------------------------------------------------|--------------|
| KS_438 | 1223 | SPV_cluster_301 | 58.867 | 406 | 1.04E-162 | Beta-ketoacyl-[acyl-carrier-protein] synthase II [Thermoflexus hugenholtzii]                | WP_098502948 |
| KS_441 | 1046 | SPV_cluster_443 | 56.232 | 345 | 2.75E-135 | Beta-ketoacyl-[acyl-carrier-protein] synthase II [Thermomicrobium roseum]                   | WP_012642981 |
| KS_442 | 1175 | SPV_cluster_152 | 56.604 | 371 | 6.34E-149 | Beta-ketoacyl-[acyl-carrier-protein] synthase II [Thermomicrobium roseum]                   | WP_012642981 |
| KS_443 | 1175 | SPV_cluster_414 | 61.983 | 363 | 2.40E-139 | Beta-ketoacyl-[acyl-carrier-protein] synthase II [Thermoflexus hugenholtzii]                | WP_098504331 |
| KS_444 | 1235 | SPV_cluster_083 | 57.664 | 411 | 9.24E-171 | Beta-ketoacyl-[acyl-carrier-protein] synthase II [Desmospora sp. 8437]                      | WP_040387222 |
| KS_445 | 1286 | SPV_cluster_071 | 54.545 | 429 | 1.14E-139 | Type I polyketide synthase, partial [Burkholderia vietnamiensis]                            | WP_059567396 |
| KS_450 | 1292 | SPV_cluster_412 | 41.333 | 450 | 5.04E-90  | Type I polyketide synthase [Sciscionella marina]                                            | WP_020497474 |
| KS_451 | 1289 | SPV_cluster_114 | 54.206 | 428 | 3.08E-137 | Type I polyketide synthase [Mycolicibacterium austroafricanum]                              | WP_051558318 |
| KS_456 | 1184 | SPV_cluster_263 | 73.59  | 390 | 0         | Beta-ketoacyl-[acyl-carrier-protein] synthase II [Thioalkalivibrio sp. HK1]                 | WP_038098656 |
| KS_457 | 1286 | SPV_cluster_047 | 53.828 | 431 | 2.74E-130 | Type I polyketide synthase, partial [Mycobacterium parascrofulaceum]                        | WP_007169537 |
| KS_458 | 1145 | SPV_cluster_236 | 55.263 | 380 | 1.32E-128 | Beta-ketoacyl-[acyl-carrier-protein] synthase family protein [Mizugakiibacter sediminis]    | WP_082306570 |
| KS_463 | 1190 | SPV_cluster_066 | 69.424 | 399 | 0         | Beta-ketoacyl-[acyl-carrier-protein] synthase II [Pararhodobacter aggregans]                | WP_107749575 |
| KS_464 | 1178 | SPV_cluster_069 | 67.519 | 391 | 0         | Beta-ketoacyl-[acyl-carrier-protein] synthase II [Bryobacter aggregatus]                    | WP_031496688 |
| KS_467 | 1196 | SPV_cluster_364 | 54.68  | 406 | 1.49E-137 | Beta-ketoacyl-[acyl-carrier-protein] synthase II [Thermocrinis albus]                       | WP_012991141 |
| KS_470 | 977  | SPV_cluster_330 | 92.26  | 323 | 0         | Beta-ketoacyl-[acyl-carrier-protein] synthase II [Rhodospirillaceae bacterium Spongia-Bin9] | WP_108792873 |
| KS_472 | 1211 | SPV_cluster_259 | 74.121 | 398 | 0         | Beta-ketoacyl-[acyl-carrier-protein] synthase II [Telmatospirillum siberiense]              | WP_101252614 |
| KS_475 | 1154 | SPV_cluster_366 | 72.324 | 383 | 0         | Beta-ketoacyl-ACP synthase I [Thermopetrobacter sp. TC1]                                    | WP_038035251 |
| KS_477 | 1286 | SPV_cluster_291 | 52.558 | 430 | 4.86E-138 | Polyketide synthase [Scytonema sp. HK-05]                                                   | WP_073629410 |
| KS_478 | 1142 | SPV_cluster_380 | 38.806 | 201 | 3.36E-29  | Beta-ketoacyl-[acyl-carrier-protein] synthase family protein [Streptomyces atratus]         | WP_072488766 |
| KS_480 | 1199 | SPV_cluster_334 | 75.127 | 394 | 0         | Beta-ketoacyl-[acyl-carrier-protein] synthase II [Rhodospirillales bacterium URHD0088]      | WP_027300572 |
| KS_482 | 1172 | SPV_cluster_182 | 59.383 | 389 | 1.88E-172 | Beta-ketoacyl-[acyl-carrier-protein] synthase II [Vulcanibacillus modesticaldus]            | WP_069655673 |
| KS_485 | 1298 | SPV_cluster_226 | 56.019 | 432 | 2.47E-139 | Type I polyketide synthase [Mycobacterium malmoense]                                        | WP_071509339 |
| KS_487 | 1112 | SPV_cluster_179 | 62.216 | 352 | 1.20E-134 | Beta-ketoacyl-ACP synthase II [Ilumatobacter nonamiensis]                                   | WP_040493091 |
| KS_489 | 1292 | SPV_cluster_220 | 43.779 | 434 | 2.87E-92  | Type I polyketide synthase, partial [Streptomyces sp. SM5]                                  | WP_103492552 |
| KS_492 | 1172 | SPV_cluster_240 | 68.475 | 387 | 0         | Beta-ketoacyl-[acyl-carrier-protein] synthase II [Thermoflexus hugenholtzii]                | WP_098504330 |
| KS_493 | 1286 | SPV_cluster_134 | 50.577 | 433 | 1.62E-133 | Type I polyketide synthase [Moorea producens]                                               | WP_071104824 |

|        |      |                 |        |     |           |                                                                                                 |              |
|--------|------|-----------------|--------|-----|-----------|-------------------------------------------------------------------------------------------------|--------------|
| KS_496 | 1166 | SPV_cluster_274 | 58.098 | 389 | 1.05E-170 | Beta-ketoacyl-[acyl-carrier-protein] synthase II [Vulcanibacillus modesticaldus]                | WP_069655673 |
| KS_500 | 1286 | SPV_cluster_278 | 60.047 | 428 | 1.02E-151 | Type I polyketide synthase [Mycolicibacterium austroafricanum]                                  | WP_105389463 |
| KS_502 | 1286 | SPV_cluster_213 | 55.012 | 429 | 5.02E-142 | Type I polyketide synthase, partial [Burkholderia vietnamiensis]                                | WP_059668134 |
| KS_509 | 1292 | SPV_cluster_154 | 53.009 | 432 | 1.01E-136 | Hybrid non-ribosomal peptide synthetase/Type I polyketide synthase [Burkholderia vietnamiensis] | WP_059603382 |
| KS_510 | 1292 | SPV_cluster_020 | 53.704 | 432 | 2.44E-139 | Type I polyketide synthase, partial [Burkholderia vietnamiensis]                                | WP_059567396 |
| KS_512 | 1292 | SPV_cluster_264 | 43.218 | 435 | 1.69E-88  | Type I polyketide synthase [Streptomyces rubellomurinus]                                        | WP_078860657 |
| KS_513 | 1160 | SPV_cluster_316 | 56.623 | 385 | 2.31E-164 | Beta-ketoacyl-[acyl-carrier-protein] synthase II [Vulcanibacillus modesticaldus]                | WP_069655673 |
| KS_515 | 1244 | SPV_cluster_029 | 61.557 | 424 | 2.54E-152 | Type I polyketide synthase [Mycolicibacterium austroafricanum]                                  | WP_051558318 |
| KS_522 | 1229 | SPV_cluster_433 | 57.702 | 409 | 1.83E-168 | Beta-ketoacyl-[acyl-carrier-protein] synthase II [Thermicanus aegyptius]                        | WP_028987687 |
| KS_523 | 1283 | SPV_cluster_208 | 60.047 | 428 | 5.12E-150 | Type I polyketide synthase [Mycolicibacterium vanbaalenii]                                      | WP_011778276 |
| KS_524 | 1286 | SPV_cluster_051 | 54.079 | 429 | 1.08E-141 | Type I polyketide synthase, partial [Burkholderia vietnamiensis]                                | WP_059567396 |
| KS_530 | 1292 | SPV_cluster_174 | 52.214 | 429 | 2.02E-134 | Hybrid non-ribosomal peptide synthetase/Type I polyketide synthase [Burkholderia vietnamiensis] | WP_059603382 |
| KS_531 | 1058 | SPV_cluster_337 | 93.023 | 258 | 1.78E-168 | Beta-ketoacyl-ACP synthase [Rhodospirillaceae bacterium Spongia-Bin9]                           | WP_108793187 |
| KS_533 | 1292 | SPV_cluster_368 | 41.002 | 439 | 1.25E-90  | Type I polyketide synthase [Crossiella equi]                                                    | WP_086785133 |
| KS_534 | 1286 | SPV_cluster_326 | 57.674 | 430 | 1.27E-150 | Type I polyketide synthase [Mycolicibacterium diernhoferi]                                      | WP_073855454 |
| KS_535 | 1286 | SPV_cluster_269 | 54.545 | 429 | 6.68E-139 | Hybrid non-ribosomal peptide synthetase/Type I polyketide synthase [Burkholderia vietnamiensis] | WP_059603382 |
| KS_539 | 1286 | SPV_cluster_102 | 57.11  | 429 | 4.66E-145 | Type I polyketide synthase [Mycolicibacterium obuense]                                          | WP_048421716 |
| KS_542 | 1286 | SPV_cluster_299 | 53.935 | 432 | 1.04E-140 | Type I polyketide synthase, partial [Burkholderia vietnamiensis]                                | WP_059668134 |
| KS_544 | 1286 | SPV_cluster_078 | 54.801 | 427 | 3.54E-153 | Polyketide synthase [Stanieria cyanosphaera]                                                    | WP_015193130 |
| KS_547 | 1292 | SPV_cluster_008 | 53.846 | 429 | 2.94E-140 | Hybrid non-ribosomal peptide synthetase/Type I polyketide synthase [Burkholderia vietnamiensis] | WP_059740130 |
| KS_552 | 1277 | SPV_cluster_169 | 62.441 | 426 | 2.34E-159 | Type I polyketide synthase [Mycolicibacterium austroafricanum]                                  | WP_105389463 |
| KS_556 | 1286 | SPV_cluster_212 | 55.116 | 430 | 7.99E-141 | Type I polyketide synthase [Mycolicibacterium tusciae]                                          | WP_006241768 |
| KS_560 | 1283 | SPV_cluster_082 | 57.11  | 429 | 1.64E-143 | Type I polyketide synthase [Mycobacterium]                                                      | WP_064413884 |
| KS_561 | 1250 | SPV_cluster_221 | 60.28  | 428 | 4.17E-151 | Type I polyketide synthase [Mycolicibacterium austroafricanum]                                  | WP_105389463 |
| KS_562 | 1292 | SPV_cluster_151 | 55.711 | 429 | 2.14E-140 | Type I polyketide synthase [Mycolicibacter icosiumassiliensis]                                  | WP_078058707 |
| KS_565 | 1259 | SPV_cluster_030 | 61.502 | 426 | 2.52E-158 | Type I polyketide synthase [Mycobacterium colombiense]                                          | WP_076107742 |
| KS_566 | 1286 | SPV_cluster_311 | 54.503 | 433 | 3.00E-139 | Type I polyketide synthase [Mycobacterium sp. 852002-51961 SCH5331710]                          | WP_067083408 |
| KS_567 | 1301 | SPV_cluster_246 | 58.605 | 430 | 7.73E-146 | Type I polyketide synthase [Mycolicibacterium austroafricanum]                                  | WP_105389463 |

|        |      |                 |        |     |           |                                                                                            |              |
|--------|------|-----------------|--------|-----|-----------|--------------------------------------------------------------------------------------------|--------------|
| KS_568 | 1166 | SPV_cluster_250 | 61.538 | 351 | 8.15E-145 | Beta-ketoacyl-[acyl-carrier-protein] synthase family protein [Cephalotococcus capnophilus] | WP_068711256 |
| KS_571 | 1082 | SPV_cluster_376 | 44.798 | 346 | 1.78E-80  | Beta-ketoacyl-ACP synthase I [Melaminivora sp. SC2-7]                                      | WP_106847441 |
| KS_574 | 1292 | SPV_cluster_052 | 52.315 | 432 | 5.03E-137 | Type I polyketide synthase, partial [Burkholderia vietnamiensis]                           | WP_059694304 |
| KS_578 | 1178 | SPV_cluster_094 | 61.675 | 394 | 2.00E-156 | Hypothetical protein [Verminephrobacter aporrectodeae]                                     | WP_081479930 |
| KS_582 | 1010 | SPV_cluster_137 | 53.266 | 199 | 2.08E-62  | Beta-ketoacyl-ACP synthase [Cellvibrio sp. pealriver]                                      | WP_082191725 |
| KS_584 | 1025 | SPV_cluster_136 | 67.755 | 245 | 1.28E-106 | Beta-ketoacyl-ACP synthase [Thiobacillus denitrificans]                                    | WP_059752414 |
| KS_587 | 1184 | SPV_cluster_123 | 59.836 | 366 | 1.79E-136 | Hypothetical protein [Verminephrobacter aporrectodeae]                                     | WP_081479930 |
| KS_589 | 1259 | SPV_cluster_338 | 57.21  | 423 | 2.30E-140 | Type I polyketide synthase [Mycolicibacterium austroafricanum]                             | WP_105389463 |
| KS_592 | 1277 | SPV_cluster_106 | 60.941 | 425 | 5.36E-159 | Type I polyketide synthase [Mycobacterium sp. EPa45]                                       | WP_047332984 |
| KS_594 | 293  | SPV_cluster_111 | 59.783 | 92  | 7.54E-28  | Type I polyketide synthase [Mycobacterium sp. YR782]                                       | WP_108054808 |
| KS_595 | 1259 | SPV_cluster_357 | 55.896 | 424 | 2.81E-140 | Type I polyketide synthase [filamentous cyanobacterium CCP3]                               | WP_106919616 |
| KS_597 | 1256 | SPV_cluster_309 | 57.447 | 423 | 3.60E-139 | Type I polyketide synthase [Mycolicibacterium austroafricanum]                             | WP_105389463 |
| KS_598 | 1259 | SPV_cluster_394 | 51.294 | 425 | 4.70E-139 | Type I polyketide synthase [Pleurocapsa minor]                                             | WP_015144800 |
| KS_600 | 1079 | SPV_cluster_145 | 59.259 | 324 | 1.94E-133 | Beta-ketoacyl synthase [Pseudomonas flexibilis]                                            | WP_039561123 |
| KS_601 | 992  | SPV_cluster_261 | 60.905 | 243 | 1.27E-102 | 3-oxoacyl-ACP synthase [Myxococcus stipitatus]                                             | WP_015352009 |
| KS_604 | 851  | SPV_cluster_016 | 68.726 | 259 | 3.09E-125 | Beta-ketoacyl synthase [Vitiosangium sp. GDMCC 1.1324]                                     | WP_108066665 |
| KS_606 | 653  | SPV_cluster_348 | 63.721 | 215 | 5.53E-86  | Type I polyketide synthase, partial [Burkholderia vietnamiensis]                           | WP_059694304 |
| KS_610 | 287  | SPV_cluster_459 | 66.304 | 92  | 5.21E-33  | Type I polyketide synthase [Mycobacterium sherrisii]                                       | WP_085167517 |
| KS_612 | 1256 | SPV_cluster_106 | 61.647 | 425 | 1.92E-156 | Type I polyketide synthase [Mycolicibacterium austroafricanum]                             | WP_105389463 |
| KS_622 | 1259 | SPV_cluster_315 | 50.355 | 423 | 3.36E-126 | Type I polyketide synthase [Mycobacterium colombiense]                                     | WP_044486300 |
| KS_623 | 1259 | SPV_cluster_305 | 56.235 | 425 | 1.91E-134 | Type I polyketide synthase [Mycolicibacterium austroafricanum]                             | WP_105389463 |
| KS_624 | 1259 | SPV_cluster_266 | 55.319 | 423 | 5.14E-139 | Type I polyketide synthase [Mycobacterium palustre]                                        | WP_085077785 |
| KS_629 | 1259 | SPV_cluster_314 | 60.235 | 425 | 2.83E-148 | Type I polyketide synthase [Mycolicibacterium austroafricanum]                             | WP_105389463 |
| KS_631 | 1235 | SPV_cluster_377 | 61.792 | 424 | 3.72E-156 | Type I polyketide synthase [Mycobacterium asiaticum]                                       | WP_065036774 |
| KS_632 | 1259 | SPV_cluster_167 | 56.44  | 427 | 9.37E-145 | Type I polyketide synthase [Mycobacterium bohemicum]                                       | WP_085180210 |
| KS_634 | 1265 | SPV_cluster_030 | 59.811 | 423 | 6.27E-149 | Type I polyketide synthase [Mycolicibacterium austroafricanum]                             | WP_051558318 |
| KS_635 | 1262 | SPV_cluster_030 | 61.412 | 425 | 3.76E-157 | Type I polyketide synthase [Mycolicibacterium austroafricanum]                             | WP_105389463 |
| KS_639 | 1259 | SPV_cluster_260 | 57.683 | 423 | 5.45E-143 | Type I polyketide synthase, partial [Mycolicibacterium iranikum]                           | WP_081660130 |
| KS_641 | 1259 | SPV_cluster_052 | 54.273 | 433 | 1.56E-137 | Type I polyketide synthase [Mycobacterium avium]                                           | WP_033720430 |
| KS_648 | 1265 | SPV_cluster_211 | 57.21  | 423 | 2.82E-143 | Type I polyketide synthase [Mycolicibacterium austroafricanum]                             | WP_051558318 |
| KS_651 | 1256 | SPV_cluster_227 | 54.439 | 428 | 3.73E-128 | Type I polyketide synthase [Mycolicibacterium austroafricanum]                             | WP_051558318 |



|        |      |                 |        |     |           |                                                                  |              |
|--------|------|-----------------|--------|-----|-----------|------------------------------------------------------------------|--------------|
| KS_653 | 1259 | SPV_cluster_306 | 57.075 | 424 | 5.62E-140 | Type I polyketide synthase, partial [Mycolicibacterium iranicum] | WP_085171523 |
| KS_656 | 1244 | SPV_cluster_237 | 57.569 | 436 | 3.25E-145 | Type I polyketide synthase [Mycolicibacterium austroafricanum]   | WP_105389463 |
| KS_658 | 1259 | SPV_cluster_030 | 60.142 | 424 | 6.00E-151 | Type I polyketide synthase [Mycolicibacterium austroafricanum]   | WP_105389463 |
| KS_663 | 1259 | SPV_cluster_206 | 54.206 | 428 | 1.59E-137 | Type I polyketide synthase [Mycobacterium gordonae]              | WP_065161832 |
| KS_665 | 1259 | SPV_cluster_210 | 57.882 | 425 | 6.62E-142 | Type I polyketide synthase [Mycolicibacterium austroafricanum]   | WP_105389463 |
| KS_667 | 1259 | SPV_cluster_181 | 57.845 | 427 | 2.82E-143 | Type I polyketide synthase [Mycolicibacterium austroafricanum]   | WP_105389463 |
| KS_675 | 1268 | SPV_cluster_030 | 62.411 | 423 | 3.97E-160 | Type I polyketide synthase [Mycolicibacterium austroafricanum]   | WP_105389463 |
| KS_676 | 1259 | SPV_cluster_082 | 56.471 | 425 | 8.66E-139 | Type I polyketide synthase [Mycolicibacterium vanbaalenii]       | WP_011778276 |
| KS_678 | 1253 | SPV_cluster_221 | 52.927 | 427 | 8.13E-130 | Type I polyketide synthase [Mycobacterium colombiense]           | WP_077092494 |
| KS_680 | 1277 | SPV_cluster_030 | 60.78  | 436 | 8.34E-157 | Type I polyketide synthase [Mycolicibacterium austroafricanum]   | WP_105389463 |
| KS_684 | 1268 | SPV_cluster_030 | 60.757 | 423 | 2.61E-154 | Type I polyketide synthase [Mycobacterium sp. TBL 1200985]       | WP_085324847 |
| KS_686 | 1256 | SPV_cluster_191 | 55.478 | 429 | 1.03E-143 | Type I polyketide synthase [Mycobacterium sp. UNC280MFTsu5.1]    | WP_043403121 |
| KS_687 | 1259 | SPV_cluster_051 | 54.717 | 424 | 1.34E-138 | Type I polyketide synthase [Mycobacterium sp. 1245111.1]         | WP_067331050 |
| KS_690 | 1259 | SPV_cluster_096 | 55.529 | 425 | 4.39E-137 | Type I polyketide synthase [Mycolicibacterium austroafricanum]   | WP_105389463 |
| KS_694 | 1259 | SPV_cluster_057 | 56     | 425 | 2.23E-142 | Type I polyketide synthase [Mycobacterium parmense]              | WP_085270770 |
| KS_696 | 1259 | SPV_cluster_171 | 58.156 | 423 | 2.13E-143 | Type I polyketide synthase [Mycolicibacterium austroafricanum]   | WP_105389463 |
| KS_698 | 1259 | SPV_cluster_040 | 55.634 | 426 | 3.57E-139 | Type I polyketide synthase [Mycolicibacterium vanbaalenii]       | WP_011778276 |
| KS_699 | 1259 | SPV_cluster_214 | 55.399 | 426 | 9.00E-139 | Type I polyketide synthase [Mycolicibacterium vanbaalenii]       | WP_011778276 |
| KS_702 | 1271 | SPV_cluster_029 | 60.757 | 423 | 3.73E-153 | Type I polyketide synthase [Mycobacterium asiaticum]             | WP_065146316 |
| KS_703 | 1259 | SPV_cluster_134 | 53.412 | 425 | 1.06E-137 | Type I polyketide synthase [Mycolicibacterium vanbaalenii]       | WP_011778276 |
| KS_706 | 1259 | SPV_cluster_035 | 55.319 | 423 | 4.14E-138 | Type I polyketide synthase [Mycobacterium parmense]              | WP_085270770 |
| KS_709 | 1265 | SPV_cluster_071 | 54.953 | 424 | 1.27E-134 | Type I polyketide synthase [Mycobacterium asiaticum]             | WP_065157110 |
| KS_710 | 1262 | SPV_cluster_114 | 54.481 | 424 | 6.33E-140 | Type I polyketide synthase [Mycobacterium sp. EPa45]             | WP_047332984 |
| KS_711 | 1259 | SPV_cluster_084 | 54.245 | 424 | 1.88E-132 | Type I polyketide synthase [Mycolicibacterium austroafricanum]   | WP_051558318 |
| KS_713 | 1259 | SPV_cluster_146 | 57.309 | 431 | 5.25E-142 | Type I polyketide synthase [Mycolicibacterium vanbaalenii]       | WP_011778276 |
| KS_716 | 1259 | SPV_cluster_020 | 53.538 | 424 | 8.87E-137 | Type I polyketide synthase [Mycobacterium colombiense]           | WP_077092494 |
| KS_717 | 1265 | SPV_cluster_047 | 55.529 | 425 | 7.06E-140 | Type I polyketide synthase [Mycobacterium parmense]              | WP_085270770 |
| KS_718 | 1259 | SPV_cluster_154 | 56.974 | 423 | 1.83E-142 | Type I polyketide synthase [Mycolicibacterium vanbaalenii]       | WP_011778276 |
| KS_721 | 1211 | SPV_cluster_149 | 53.382 | 414 | 5.56E-132 | Type I polyketide synthase [Mycobacterium gordonae]              | WP_065161832 |
| KS_722 | 1259 | SPV_cluster_245 | 57.981 | 426 | 2.27E-145 | Type I polyketide synthase [Mycolicibacterium austroafricanum]   | WP_105389463 |
| KS_725 | 1259 | SPV_cluster_150 | 57.176 | 425 | 4.59E-142 | Type I polyketide synthase [Mycolicibacterium austroafricanum]   | WP_105389463 |
| KS_731 | 1262 | SPV_cluster_151 | 55.164 | 426 | 1.85E-139 | Type I polyketide synthase [Mycolicibacterium vanbaalenii]       | WP_011778276 |

|        |      |                 |        |     |           |                                                                        |              |
|--------|------|-----------------|--------|-----|-----------|------------------------------------------------------------------------|--------------|
| KS_734 | 1259 | SPV_cluster_174 | 55.399 | 426 | 1.18E-137 | Type I polyketide synthase [Mycolicibacterium austroafricanum]         | WP_105389463 |
| KS_736 | 1259 | SPV_cluster_005 | 55.189 | 424 | 1.26E-144 | Type I polyketide synthase [Mycobacterium asiaticum]                   | WP_065120279 |
| KS_737 | 1277 | SPV_cluster_169 | 61.982 | 434 | 4.74E-161 | Type I polyketide synthase [Mycolicibacterium austroafricanum]         | WP_105389463 |
| KS_739 | 1259 | SPV_cluster_102 | 56.674 | 427 | 3.95E-144 | Type I polyketide synthase [Mycolicibacterium vanbaalenii]             | WP_011778276 |
| KS_740 | 1262 | SPV_cluster_246 | 55.189 | 424 | 7.32E-136 | Type I polyketide synthase [Mycobacterium sp. 852002-51613 SCH5001154] | WP_067261613 |
| KS_742 | 1262 | SPV_cluster_115 | 52.57  | 428 | 1.55E-128 | Type I polyketide synthase [Mycolicibacterium austroafricanum]         | WP_051558318 |
| KS_743 | 1262 | SPV_cluster_241 | 52.103 | 428 | 3.94E-127 | Type I polyketide synthase [Mycolicibacterium vanbaalenii]             | WP_011778276 |
| KS_745 | 1259 | SPV_cluster_078 | 56.808 | 426 | 3.96E-146 | Type I polyketide synthase [Mycobacterium colombiense]                 | WP_076054218 |
| KS_748 | 1262 | SPV_cluster_168 | 53.037 | 428 | 5.24E-130 | Type I polyketide synthase [Mycolicibacterium vanbaalenii]             | WP_011778276 |
| KS_750 | 1319 | SPV_cluster_008 | 52.822 | 443 | 2.88E-137 | Type I polyketide synthase [Mycolicibacterium austroafricanum]         | WP_105389463 |
| KS_752 | 176  | SPV_cluster_457 | 60.714 | 56  | 2.03E-15  | Type I polyketide synthase [Streptomyces sp. NBS 14/10]                | WP_089509394 |
| KS_753 | 1262 | SPV_cluster_030 | 61.939 | 423 | 5.53E-157 | Type I polyketide synthase [Mycolicibacterium austroafricanum]         | WP_105389463 |
| KS_756 | 1250 | SPV_cluster_030 | 59.155 | 426 | 6.74E-151 | Type I polyketide synthase [Mycolicibacterium austroafricanum]         | WP_105389463 |
| KS_760 | 1268 | SPV_cluster_029 | 60.748 | 428 | 7.57E-152 | Type I polyketide synthase [Mycolicibacterium austroafricanum]         | WP_105389463 |
| KS_762 | 1277 | SPV_cluster_106 | 58.156 | 423 | 1.25E-144 | Type I polyketide synthase [Mycobacterium sp. IS-1744]                 | WP_064399965 |

Table S14. BLAST search of the BGCs identified from the metagenome of *Clathria reinwardti* against the MiBIG database

| BGC ID          | Predicted BGC type | MiBIG Protein | MiBIG Cluster | MiBIG Product               | Identity (%) | Coverage (%) | BLAST Score | E-value  |
|-----------------|--------------------|---------------|---------------|-----------------------------|--------------|--------------|-------------|----------|
| CLR_cluster_008 | Arylpolyene        | AAO39098      | BGC0000956    | Andrimid                    | 34           | 63.7         | 314         | 5.0E-85  |
| CLR_cluster_032 | Arylpolyene        | ADI58650      | BGC0000187    | Asukamycin                  | 40           | 91.0         | 214         | 2.8E-55  |
| CLR_cluster_044 | Arylpolyene        | ANY57968      | BGC0001369    | Metatricycloene             | 34           | 91.9         | 321         | 3.1E-87  |
| CLR_cluster_070 | Arylpolyene        | AAW85352      | BGC0000837    | APE_Vf                      | 38           | 97.8         | 240         | 2.6E-63  |
| CLR_cluster_081 | Arylpolyene        | ADI58650      | BGC0000187    | Asukamycin                  | 40           | 61.6         | 212         | 1.6E-54  |
| CLR_cluster_102 | Arylpolyene        | AAW85355      | BGC0000837    | APE_Vf                      | 57           | 100.0        | 424         | 1.5E-118 |
| CLR_cluster_137 | Arylpolyene        | AHA12083      | BGC0001172    | Chlorizidine_A              | 35           | 99.5         | 177         | 3.7E-44  |
| CLR_cluster_221 | Arylpolyene        | CAAN79651     | BGC0000836    | APE_Ec                      | 42           | 98.2         | 248         | 1.6E-65  |
| CLR_cluster_028 | Bacteriocin        | -             | -             | -                           | -            | -            | -           | -        |
| CLR_cluster_037 | Bacteriocin        | ACA04490      | BGC0000477    | Patellin_2/patellin_3       | 40           | 103.4        | 528         | 1.5E-149 |
| CLR_cluster_063 | Bacteriocin        | BAE46919      | BGC0000565    | Goadsporin                  | 44           | 95.7         | 569         | 8.0E-162 |
| CLR_cluster_067 | Bacteriocin        | CCH92967      | BGC0000483    | Aeruginosamide              | 41           | 101.6        | 539         | 5.2E-153 |
| CLR_cluster_092 | Bacteriocin        | BAE46919      | BGC0000565    | Goadsporin                  | 44           | 96.2         | 558         | 1.1E-158 |
| CLR_cluster_119 | Bacteriocin        | CAO82084      | BGC0000473    | Microcyclamide              | 42           | 100.9        | 533         | 4.8E-151 |
| CLR_cluster_120 | Bacteriocin        | ZP_00672901   | BGC0000481    | Trichamide                  | 39           | 102.8        | 515         | 1.3E-145 |
| CLR_cluster_169 | Bacteriocin        | -             | -             | -                           | -            | -            | -           | -        |
| CLR_cluster_170 | Bacteriocin        | BAP82649      | BGC0001148    | Pheganomycin                | 42           | 94.0         | 290         | 2.8E-78  |
| CLR_cluster_195 | Bacteriocin        | BAE46919      | BGC0000565    | Goadsporin                  | 41           | 98.7         | 534         | 2.8E-151 |
| CLR_cluster_274 | Bacteriocin        | -             | -             | -                           | -            | -            | -           | -        |
| CLR_cluster_280 | Bacteriocin        | AAY21153      | BGC0000475    | Patellamide_A/patellamide_C | 33           | 106.4        | 187         | 3.1E-47  |
| CLR_cluster_001 | Cf_fatty_acid      | ALV82456      | BGC0001382    | Svaricin                    | 46           | 98.8         | 349         | 5.3E-96  |
| CLR_cluster_006 | Cf_fatty_acid      | ALV82456      | BGC0001382    | Svaricin                    | 48           | 99.3         | 379         | 3.6E-105 |
| CLR_cluster_007 | Cf_fatty_acid      | LV82456       | BGC0001382    | Svaricin                    | 44           | 99.0         | 354         | 2.1E-97  |
| CLR_cluster_009 | Cf_fatty_acid      | AIL50179      | BGC0000213    | Colabomycin                 | 27           | 103.6        | 89          | 1.2E-17  |
| CLR_cluster_012 | Cf_fatty_acid      | ALV82456      | BGC0001382    | Svaricin                    | 48           | 99.3         | 376         | 3.1E-104 |
| CLR_cluster_013 | Cf_fatty_acid      | ALV82456      | BGC0001382    | Svaricin                    | 48           | 98.3         | 385         | 6.7E-107 |
| CLR_cluster_015 | Cf_fatty_acid      | ALV82456      | BGC0001382    | Svaricin                    | 47           | 98.5         | 362         | 7.9E-100 |
| CLR_cluster_017 | Cf_fatty_acid      | CAA16177      | BGC0001063    | Undecylprodigiosin          | 44           | 103.1        | 279         | 6.4E-75  |
| CLR_cluster_022 | Cf_fatty_acid      | ALV82456      | BGC0001382    | Svaricin                    | 49           | 99.0         | 371         | 1.0E-102 |

|                 |               |          |            |                    |    |       |     |          |
|-----------------|---------------|----------|------------|--------------------|----|-------|-----|----------|
| CLR_cluster_023 | Cf_fatty_acid | CAA16179 | BGC0001063 | Undecylprodigiosin | 45 | 97.6  | 264 | 1.8E-70  |
| CLR_cluster_025 | Cf_fatty_acid | ALV82456 | BGC0001382 | Svaricin           | 48 | 97.4  | 367 | 2.5E-101 |
| CLR_cluster_030 | Cf_fatty_acid | ALV82456 | BGC0001382 | Svaricin           | 50 | 98.3  | 399 | 4.6E-111 |
| CLR_cluster_031 | Cf_fatty_acid | CAA16179 | BGC0001063 | Undecylprodigiosin | 47 | 91.9  | 275 | 1.1E-73  |
| CLR_cluster_041 | Cf_fatty_acid | ALV82456 | BGC0001382 | Svaricin           | 46 | 100.0 | 366 | 4.2E-101 |
| CLR_cluster_043 | Cf_fatty_acid | AJO72736 | BGC0001381 | Brasilinolide      | 28 | 46.6  | 62  | 1.4E-09  |
| CLR_cluster_045 | Cf_fatty_acid | ALV82456 | BGC0001382 | Svaricin           | 47 | 98.3  | 367 | 2.5E-101 |
| CLR_cluster_046 | Cf_fatty_acid | CAA16179 | BGC0001063 | Undecylprodigiosin | 46 | 94.8  | 269 | 5.9E-72  |
| CLR_cluster_049 | Cf_fatty_acid | ALV82456 | BGC0001382 | Svaricin           | 46 | 98.8  | 366 | 4.2E-101 |
| CLR_cluster_060 | Cf_fatty_acid | ALV82456 | BGC0001382 | Svaricin           | 46 | 97.6  | 372 | 6.0E-103 |
| CLR_cluster_064 | Cf_fatty_acid | ALV82456 | BGC0001382 | Svaricin           | 48 | 98.5  | 374 | 1.2E-103 |
| CLR_cluster_065 | Cf_fatty_acid | ALV82456 | BGC0001382 | Svaricin           | 49 | 99.3  | 364 | 1.2E-100 |
| CLR_cluster_069 | Cf_fatty_acid | AHF22848 | BGC0000091 | Marineosin         | 46 | 103.8 | 305 | 8.4E-83  |
| CLR_cluster_072 | Cf_fatty_acid | ALV82456 | BGC0001382 | Svaricin           | 48 | 98.4  | 376 | 4.2E-104 |
| CLR_cluster_077 | Cf_fatty_acid | CAA16179 | BGC0001063 | Undecylprodigiosin | 35 | 84.2  | 161 | 1.4E-39  |
| CLR_cluster_079 | Cf_fatty_acid | ALV82456 | BGC0001382 | Svaricin           | 50 | 98.3  | 370 | 2.3E-102 |
| CLR_cluster_082 | Cf_fatty_acid | ALV82456 | BGC0001382 | Svaricin           | 47 | 99.8  | 382 | 7.3E-106 |
| CLR_cluster_085 | Cf_fatty_acid | ALV82456 | BGC0001382 | Svaricin           | 48 | 98.0  | 375 | 9.0E-104 |
| CLR_cluster_086 | Cf_fatty_acid | ALV82456 | BGC0001382 | Svaricin           | 50 | 98.8  | 387 | 1.8E-107 |
| CLR_cluster_096 | Cf_fatty_acid | ALV82456 | BGC0001382 | Svaricin           | 50 | 98.3  | 370 | 2.3E-102 |
| CLR_cluster_097 | Cf_fatty_acid | ALV82456 | BGC0001382 | Svaricin           | 46 | 99.0  | 362 | 7.9E-100 |
| CLR_cluster_098 | Cf_fatty_acid | AHA12083 | BGC0001172 | Chlorizidine_A     | 46 | 97.1  | 309 | 8.0E-84  |
| CLR_cluster_101 | Cf_fatty_acid | ALV82456 | BGC0001382 | Svaricin           | 46 | 98.1  | 365 | 7.2E-101 |
| CLR_cluster_104 | Cf_fatty_acid | ALV82456 | BGC0001382 | Svaricin           | 49 | 98.8  | 377 | 1.8E-104 |
| CLR_cluster_109 | Cf_fatty_acid | -        | -          | -                  | -  | -     | -   | -        |
| CLR_cluster_110 | Cf_fatty_acid | ABQ04139 | BGC0000838 | Flexirubin         | 40 | 100.5 | 294 | 1.5E-79  |
| CLR_cluster_112 | Cf_fatty_acid | ALV82456 | BGC0001382 | Svaricin           | 50 | 98.2  | 367 | 1.8E-101 |
| CLR_cluster_113 | Cf_fatty_acid | CAA16179 | BGC0001063 | Undecylprodigiosin | 46 | 97.0  | 269 | 7.4E-72  |
| CLR_cluster_114 | Cf_fatty_acid | AHF22848 | BGC0000091 | Marineosin         | 47 | 103.0 | 306 | 4.9E-83  |
| CLR_cluster_118 | Cf_fatty_acid | CAA16177 | BGC0001063 | Undecylprodigiosin | 44 | 102.8 | 297 | 2.3E-80  |
| CLR_cluster_121 | Cf_fatty_acid | ALV82456 | BGC0001382 | Svaricin           | 49 | 98.8  | 395 | 6.4E-110 |
| CLR_cluster_122 | Cf_fatty_acid | ALV82456 | BGC0001382 | Svaricin           | 46 | 99.0  | 359 | 6.7E-99  |

|                 |               |          |            |                    |    |       |     |          |
|-----------------|---------------|----------|------------|--------------------|----|-------|-----|----------|
| CLR_cluster_126 | Cf_fatty_acid | ABQ04139 | BGC0000838 | Flexirubin         | 40 | 100.7 | 292 | 7.6E-79  |
| CLR_cluster_127 | Cf_fatty_acid | ACU59351 | BGC0000839 | Flexirubin         | 42 | 101.5 | 272 | 6.1E-73  |
| CLR_cluster_128 | Cf_fatty_acid | ALV82456 | BGC0001382 | Svaricin           | 45 | 99.0  | 345 | 1.0E-94  |
| CLR_cluster_134 | Cf_fatty_acid | CAA16177 | BGC0001063 | Undecylprodigiosin | 52 | 98.8  | 348 | 1.2E-95  |
| CLR_cluster_138 | Cf_fatty_acid | AEK75497 | BGC0000001 | Abyssomicin        | 26 | 85.7  | 61  | 3.1E-09  |
| CLR_cluster_139 | Cf_fatty_acid | ALV82456 | BGC0001382 | Svaricin           | 30 | 90.0  | 139 | 1.1E-32  |
| CLR_cluster_140 | Cf_fatty_acid | AHF22848 | BGC0000091 | Marineosin         | 44 | 105.6 | 289 | 8.0E-78  |
| CLR_cluster_141 | Cf_fatty_acid | ALV82456 | BGC0001382 | Svaricin           | 47 | 99.1  | 302 | 8.2E-82  |
| CLR_cluster_143 | Cf_fatty_acid | ALV82456 | BGC0001382 | Svaricin           | 48 | 100.2 | 363 | 3.6E-100 |
| CLR_cluster_145 | Cf_fatty_acid | ALV82456 | BGC0001382 | Svaricin           | 48 | 99.1  | 368 | 1.1E-101 |
| CLR_cluster_147 | Cf_fatty_acid | ALV82456 | BGC0001382 | Svaricin           | 47 | 98.1  | 369 | 6.5E-102 |
| CLR_cluster_148 | Cf_fatty_acid | CAA16179 | BGC0001063 | Undecylprodigiosin | 40 | 87.1  | 225 | 7.9E-59  |
| CLR_cluster_156 | Cf_fatty_acid | ALV82456 | BGC0001382 | Svaricin           | 49 | 95.6  | 349 | 7.3E-96  |
| CLR_cluster_162 | Cf_fatty_acid | ALV82456 | BGC0001382 | Svaricin           | 47 | 98.1  | 361 | 1.0E-99  |
| CLR_cluster_165 | Cf_fatty_acid | ALV82456 | BGC0001382 | Svaricin           | 47 | 98.3  | 373 | 3.4E-103 |
| CLR_cluster_166 | Cf_fatty_acid | ALV82456 | BGC0001382 | Svaricin           | 48 | 100.2 | 367 | 2.5E-101 |
| CLR_cluster_179 | Cf_fatty_acid | CAA16177 | BGC0001063 | Undecylprodigiosin | 50 | 99.3  | 386 | 3.0E-107 |
| CLR_cluster_184 | Cf_fatty_acid | AHA12083 | BGC0001172 | Chlorizidine_A     | 49 | 99.3  | 356 | 5.9E-98  |
| CLR_cluster_190 | Cf_fatty_acid | ALV82456 | BGC0001382 | Svaricin           | 47 | 97.8  | 372 | 7.6E-103 |
| CLR_cluster_191 | Cf_fatty_acid | ALV82456 | BGC0001382 | Svaricin           | 45 | 100.2 | 361 | 1.8E-99  |
| CLR_cluster_193 | Cf_fatty_acid | ALV82456 | BGC0001382 | Svaricin           | 46 | 98.5  | 346 | 5.9E-95  |
| CLR_cluster_200 | Cf_fatty_acid | ALV82456 | BGC0001382 | Svaricin           | 47 | 97.7  | 363 | 4.8E-100 |
| CLR_cluster_201 | Cf_fatty_acid | ALV82456 | BGC0001382 | Svaricin           | 48 | 97.4  | 370 | 2.2E-102 |
| CLR_cluster_204 | Cf_fatty_acid | ALV82456 | BGC0001382 | Svaricin           | 50 | 97.9  | 375 | 9.3E-104 |
| CLR_cluster_214 | Cf_fatty_acid | AHF22848 | BGC0000091 | Marineosin         | 47 | 102.5 | 309 | 4.4E-84  |
| CLR_cluster_220 | Cf_fatty_acid | ALV82456 | BGC0001382 | Svaricin           | 45 | 99.3  | 356 | 5.6E-98  |
| CLR_cluster_223 | Cf_fatty_acid | CAA16179 | BGC0001063 | Undecylprodigiosin | 46 | 92.6  | 254 | 2.0E-67  |
| CLR_cluster_224 | Cf_fatty_acid | ALV82456 | BGC0001382 | Svaricin           | 46 | 99.3  | 355 | 9.7E-98  |
| CLR_cluster_226 | Cf_fatty_acid | CAA16179 | BGC0001063 | Undecylprodigiosin | 42 | 90.7  | 235 | 7.5E-62  |
| CLR_cluster_227 | Cf_fatty_acid | CCP20057 | BGC0001119 | Divergolide        | 43 | 97.3  | 231 | 1.3E-60  |
| CLR_cluster_228 | Cf_fatty_acid | CAA16177 | BGC0001063 | Undecylprodigiosin | 49 | 97.4  | 366 | 3.2E-101 |
| CLR_cluster_230 | Cf_fatty_acid | ABQ04139 | BGC0000838 | Flexirubin         | 41 | 99.0  | 284 | 2.7E-76  |

|                 |               |              |            |                    |    |       |     |          |
|-----------------|---------------|--------------|------------|--------------------|----|-------|-----|----------|
| CLR_cluster_231 | Cf_fatty_acid | ALV82456     | BGC0001382 | Svaricin           | 46 | 97.4  | 368 | 1.1E-101 |
| CLR_cluster_232 | Cf_fatty_acid | ALV82456     | BGC0001382 | Svaricin           | 43 | 99.5  | 282 | 7.3E-76  |
| CLR_cluster_241 | Cf_fatty_acid | CAA16179     | BGC0001063 | Undecylprodigiosin | 50 | 98.8  | 272 | 5.1E-73  |
| CLR_cluster_251 | Cf_fatty_acid | CAA16177     | BGC0001063 | Undecylprodigiosin | 48 | 98.8  | 275 | 1.0E-73  |
| CLR_cluster_252 | Cf_fatty_acid | ACA34361     | BGC0001152 | Fusaricidin        | 51 | 98.6  | 334 | 1.2E-91  |
| CLR_cluster_253 | Cf_fatty_acid | ALV82456     | BGC0001382 | Svaricin           | 38 | 101.2 | 284 | 2.7E-76  |
| CLR_cluster_257 | Cf_fatty_acid | ABQ04139     | BGC0000838 | Flexirubin         | 41 | 100.7 | 294 | 2.0E-79  |
| CLR_cluster_261 | Cf_fatty_acid | ALV82456     | BGC0001382 | Svaricin           | 44 | 96.2  | 339 | 5.6E-93  |
| CLR_cluster_262 | Cf_fatty_acid | ALV82456     | BGC0001382 | Svaricin           | 48 | 97.4  | 299 | 6.8E-81  |
| CLR_cluster_264 | Cf_fatty_acid | AHF22848     | BGC0000091 | Marineosin         | 45 | 103.1 | 303 | 4.1E-82  |
| CLR_cluster_275 | Cf_fatty_acid | ALV82456     | BGC0001382 | Svaricin           | 40 | 98.1  | 268 | 1.0E-71  |
| CLR_cluster_277 | Cf_fatty_acid | ALV82456     | BGC0001382 | Svaricin           | 48 | 96.6  | 327 | 2.0E-89  |
| CLR_cluster_281 | Cf_fatty_acid | ALV82456     | BGC0001382 | Svaricin           | 50 | 98.9  | 322 | 4.5E-88  |
| CLR_cluster_010 | Ladderane     | AAV66110     | BGC0000992 | Fusaridione_A      | 31 | 65.4  | 96  | 1.1E-19  |
| CLR_cluster_042 | Ladderane     | CAL48955     | BGC0001343 | Aurachin           | 39 | 98.3  | 258 | 1.6E-68  |
| CLR_cluster_105 | Ladderane     | ANY57968     | BGC0001369 | Metatricycloene    | 38 | 64.0  | 239 | 9.2E-63  |
| CLR_cluster_187 | Lantipeptide  | ACR33053     | BGC0000495 | Actagardine        | 30 | 100.3 | 267 | 6.5E-71  |
| CLR_cluster_215 | Lantipeptide  | WP_006126651 | BGC0000554 | SRO15-3108         | 31 | 97.8  | 256 | 1.3E-67  |
| CLR_cluster_011 | Other         | ABF88003     | BGC0000871 | VEPE/AEPE/TG-1     | 30 | 104.8 | 594 | 2.5E-169 |
| CLR_cluster_018 | Other         | ABF88003     | BGC0000871 | VEPE/AEPE/TG-1     | 33 | 102.3 | 635 | 1.3E-181 |
| CLR_cluster_036 | Other         | ACR50797     | BGC0000163 | Tetronasin         | 37 | 62.8  | 337 | 3.6E-92  |
| CLR_cluster_051 | Other         | ABF87031     | BGC0000393 | Myxoprincomide     | 42 | 53.9  | 364 | 5.2E-100 |
| CLR_cluster_054 | Other         | ABF87031     | BGC0000393 | Myxoprincomide     | 41 | 54.9  | 354 | 4.1E-97  |
| CLR_cluster_083 | Other         | ABF88003     | BGC0000871 | VEPE/AEPE/TG-1     | 29 | 107.4 | 285 | 2.6E-76  |
| CLR_cluster_090 | Other         | ABF88003     | BGC0000871 | VEPE/AEPE/TG-1     | 30 | 104.7 | 478 | 2.0E-134 |
| CLR_cluster_094 | Other         | AEU11005     | BGC0001029 | Nostophycin        | 29 | 91.6  | 420 | 7.0E-117 |
| CLR_cluster_111 | Other         | ABF88003     | BGC0000871 | VEPE/AEPE/TG-1     | 34 | 99.2  | 447 | 4.0E-125 |
| CLR_cluster_142 | Other         | ABF87031     | BGC0000393 | Myxoprincomide     | 37 | 59.4  | 298 | 3.5E-80  |
| CLR_cluster_151 | Other         | CAQ71826     | BGC0001189 | Taiwachelin        | 41 | 81.1  | 318 | 1.4E-86  |
| CLR_cluster_164 | Other         | ABF88003     | BGC0000871 | VEPE/AEPE/TG-1     | 30 | 96.6  | 283 | 7.4E-76  |
| CLR_cluster_182 | Other         | ABF88003     | BGC0000871 | VEPE/AEPE/TG-1     | 43 | 100.6 | 944 | 1.5E-274 |
| CLR_cluster_196 | Other         | ABF88003     | BGC0000871 | VEPE/AEPE/TG-1     | 30 | 71.0  | 257 | 8.4E-68  |

|                 |             |           |            |                 |    |       |     |          |
|-----------------|-------------|-----------|------------|-----------------|----|-------|-----|----------|
| CLR_cluster_238 | Other       | ABF88003  | BGC0000871 | VEPE/AEPE/TG-1  | 32 | 96.0  | 343 | 5.1E-94  |
| CLR_cluster_258 | Other       | CAQ71826  | BGC0001189 | Taiwachelin     | 40 | 77.0  | 275 | 1.3E-73  |
| CLR_cluster_259 | Other       | CAQ71826  | BGC0001189 | Taiwachelin     | 40 | 73.4  | 250 | 3.2E-66  |
| CLR_cluster_273 | Other       | ABF88003  | BGC0000871 | VEPE/AEPE/TG-1  | 27 | 104.4 | 106 | 1.0E-22  |
| CLR_cluster_276 | Other       | CAI94682  | BGC0000141 | Rubradirin      | 37 | 52.3  | 127 | 3.1E-29  |
| CLR_cluster_158 | Phosphonate | ADB43073  | BGC0000926 | Rhizocticin     | 50 | 51.9  | 280 | 4.0E-75  |
| CLR_cluster_171 | Phosphonate | ADB43073  | BGC0000926 | Rhizocticin     | 48 | 62.1  | 255 | 1.1E-67  |
| CLR_cluster_209 | Phosphonate | ADB43073  | BGC0000926 | Rhizocticin     | 43 | 54.6  | 249 | 7.5E-66  |
| CLR_cluster_240 | Phosphonate | ADB43073  | BGC0000926 | Rhizocticin     | 44 | 54.9  | 250 | 5.7E-66  |
| CLR_cluster_267 | Phosphonate | ADB43073  | BGC0000926 | Rhizocticin     | 48 | 54.6  | 257 | 3.2E-68  |
| CLR_cluster_002 | Terpene     | NP_199612 | BGC0000670 | Thalianol       | 32 | 58.9  | 329 | 1.2E-89  |
| CLR_cluster_003 | Terpene     | CAB39693  | BGC0000663 | Hopene          | 40 | 56.7  | 135 | 1.4E-31  |
| CLR_cluster_004 | Terpene     | -         | -          | -               | -  | -     | -   | -        |
| CLR_cluster_016 | Terpene     | -         | -          | -               | -  | -     | -   | -        |
| CLR_cluster_019 | Terpene     | BAG16278  | BGC0000632 | Brasilicardin_A | 33 | 32.6  | 76  | 1.6E-13  |
| CLR_cluster_033 | Terpene     | NP_199612 | BGC0000670 | Thalianol       | 32 | 59.0  | 319 | 1.2E-86  |
| CLR_cluster_035 | Terpene     | CAB39697  | BGC0000663 | Hopene          | 42 | 90.3  | 520 | 2.3E-147 |
| CLR_cluster_038 | Terpene     | CAB39697  | BGC0000663 | Hopene          | 55 | 98.9  | 727 | 1.2E-209 |
| CLR_cluster_039 | Terpene     | CAB39693  | BGC0000663 | Hopene          | 47 | 89.9  | 257 | 2.2E-68  |
| CLR_cluster_052 | Terpene     | AMY15074  | BGC0001339 | Squalestatin_S1 | 26 | 83.1  | 90  | 5.0E-18  |
| CLR_cluster_061 | Terpene     | CAB39697  | BGC0000663 | Hopene          | 32 | 94.0  | 153 | 5.8E-37  |
| CLR_cluster_071 | Terpene     | -         | -          | -               | -  | -     | -   | -        |
| CLR_cluster_073 | Terpene     | CAB39697  | BGC0000663 | Hopene          | 59 | 97.5  | 651 | 1.2E-186 |
| CLR_cluster_074 | Terpene     | -         | -          | -               | -  | -     | -   | -        |
| CLR_cluster_078 | Terpene     | NP_199612 | BGC0000670 | Thalianol       | 33 | 62.0  | 318 | 3.4E-86  |
| CLR_cluster_084 | Terpene     | -         | -          | -               | -  | -     | -   | -        |
| CLR_cluster_088 | Terpene     | -         | -          | -               | -  | -     | -   | -        |
| CLR_cluster_091 | Terpene     | NP_199612 | BGC0000670 | Thalianol       | 32 | 60.4  | 321 | 5.5E-87  |
| CLR_cluster_095 | Terpene     | NP_199612 | BGC0000670 | Thalianol       | 32 | 58.5  | 319 | 1.6E-86  |
| CLR_cluster_099 | Terpene     | -         | -          | -               | -  | -     | -   | -        |
| CLR_cluster_100 | Terpene     | -         | -          | -               | -  | -     | -   | -        |
| CLR_cluster_115 | Terpene     | -         | -          | -               | -  | -     | -   | -        |

|                 |         |                     |            |            |    |       |     |          |
|-----------------|---------|---------------------|------------|------------|----|-------|-----|----------|
| CLR_cluster_116 | Terpene | -                   | -          | -          | -  | -     | -   | -        |
| CLR_cluster_129 | Terpene | CAB39697            | BGC0000663 | Hopene     | 38 | 94.5  | 473 | 4.1E-133 |
| CLR_cluster_150 | Terpene | -                   | -          | -          | -  | -     | -   | -        |
| CLR_cluster_152 | Terpene | CAB39697            | BGC0000663 | Hopene     | 42 | 99.1  | 412 | 8.8E-115 |
| CLR_cluster_157 | Terpene | -                   | -          | -          | -  | -     | -   | -        |
| CLR_cluster_167 | Terpene | NP_199612           | BGC0000670 | Thalianol  | 32 | 87.4  | 310 | 5.1E-84  |
| CLR_cluster_168 | Terpene | chr3.CM0292.40.r2.m | BGC0001317 | Lupeol     | 34 | 100.5 | 366 | 8.3E-101 |
| CLR_cluster_172 | Terpene | CAB39697            | BGC0000663 | Hopene     | 40 | 92.8  | 406 | 4.9E-113 |
| CLR_cluster_178 | Terpene | -                   | -          | -          | -  | -     | -   | -        |
| CLR_cluster_185 | Terpene | -                   | -          | -          | -  | -     | -   | -        |
| CLR_cluster_186 | Terpene | chr3.CM0292.40.r2.m | BGC0001317 | Lupeol     | 35 | 60.4  | 384 | 5.1E-106 |
| CLR_cluster_188 | Terpene | CAB39697            | BGC0000663 | Hopene     | 49 | 97.9  | 623 | 3.8E-178 |
| CLR_cluster_189 | Terpene | chr3.CM0292.40.r2.m | BGC0001317 | Lupeol     | 36 | 96.1  | 220 | 2.8E-57  |
| CLR_cluster_198 | Terpene | -                   | -          | -          | -  | -     | -   | -        |
| CLR_cluster_199 | Terpene | -                   | -          | -          | -  | -     | -   | -        |
| CLR_cluster_205 | Terpene | CAB39697            | BGC0000663 | Hopene     | 37 | 92.3  | 299 | 6.8E-81  |
| CLR_cluster_207 | Terpene | NP_199612           | BGC0000670 | Thalianol  | 31 | 56.9  | 125 | 2.0E-28  |
| CLR_cluster_210 | Terpene | ABP56869            | BGC0001087 | Sioxanthin | 29 | 71.5  | 66  | 5.7E-11  |
| CLR_cluster_211 | Terpene | -                   | -          | -          | -  | -     | -   | -        |
| CLR_cluster_213 | Terpene | -                   | -          | -          | -  | -     | -   | -        |
| CLR_cluster_216 | Terpene | chr3.CM0292.40.r2.m | BGC0001317 | Lupeol     | 35 | 95.3  | 395 | 1.1E-109 |
| CLR_cluster_217 | Terpene | CAB39697            | BGC0000663 | Hopene     | 48 | 98.5  | 614 | 1.4E-175 |
| CLR_cluster_229 | Terpene | -                   | -          | -          | -  | -     | -   | -        |
| CLR_cluster_233 | Terpene | -                   | -          | -          | -  | -     | -   | -        |
| CLR_cluster_236 | Terpene | CAB39697            | BGC0000663 | Hopene     | 38 | 92.7  | 341 | 1.7E-93  |
| CLR_cluster_237 | Terpene | CAB39697            | BGC0000663 | Hopene     | 44 | 99.6  | 425 | 1.2E-118 |
| CLR_cluster_239 | Terpene | CAB39692            | BGC0000663 | Hopene     | 39 | 39.3  | 168 | 2.7E-41  |
| CLR_cluster_244 | Terpene | NP_199612           | BGC0000670 | Thalianol  | 31 | 94.0  | 243 | 4.1E-64  |
| CLR_cluster_254 | Terpene | -                   | -          | -          | -  | -     | -   | -        |
| CLR_cluster_256 | Terpene | -                   | -          | -          | -  | -     | -   | -        |
| CLR_cluster_260 | Terpene | AED94049            | BGC0001314 | Tirucalla  | 30 | 103.2 | 289 | 6.7E-78  |
| CLR_cluster_266 | Terpene | CAB39697            | BGC0000663 | Hopene     | 59 | 98.5  | 485 | 4.6E-137 |



|                 |                    |           |            |                   |    |       |      |          |
|-----------------|--------------------|-----------|------------|-------------------|----|-------|------|----------|
| CLR_cluster_269 | Terpene            | -         | -          | -                 | -  | -     | -    | -        |
| CLR_cluster_271 | Terpene            | NP_199612 | BGC0000670 | Thalianol         | 36 | 84.3  | 177  | 3.3E-44  |
| CLR_cluster_272 | Terpene            | CAB39697  | BGC0000663 | Hopene            | 47 | 100.9 | 379  | 6.4E-105 |
| CLR_cluster_282 | Terpene            | AAB31139  | BGC0000647 | Carotenoid        | 36 | 76.0  | 144  | 2.1E-34  |
| CLR_cluster_048 | TransAT-Type I PKS | AIW82279  | BGC0001125 | Puwainaphycins    | 36 | 78.3  | 1154 | 0.0E+00  |
| CLR_cluster_068 | TransAT-Type I PKS | AIW82279  | BGC0001125 | Puwainaphycins    | 37 | 80.0  | 1342 | 0.0E+00  |
| CLR_cluster_005 | Type I PKS         | AIW82279  | BGC0001125 | Puwainaphycins    | 37 | 76.7  | 1513 | 0.0E+00  |
| CLR_cluster_014 | Type I PKS         | AAF26921  | BGC0000988 | Epothilone        | 38 | 101.7 | 1287 | 0.0E+00  |
| CLR_cluster_020 | Type I PKS         | AHA38199  | BGC0000069 | Gephyronic_acid   | 38 | 48.1  | 1404 | 0.0E+00  |
| CLR_cluster_021 | Type I PKS         | AIW82279  | BGC0001125 | Puwainaphycins    | 39 | 102.0 | 1497 | 0.0E+00  |
| CLR_cluster_024 | Type I PKS         | CAQ18828  | BGC0000954 | Ajudazol          | 47 | 98.5  | 648  | 1.1E-185 |
| CLR_cluster_026 | Type I PKS         | AAK19883  | BGC0000147 | Soraphen          | 35 | 61.3  | 1728 | 0.0E+00  |
| CLR_cluster_027 | Type I PKS         | CAQ43075  | BGC0000970 | Chondrochloren    | 31 | 55.5  | 481  | 5.1E-135 |
| CLR_cluster_029 | Type I PKS         | AAS98781  | BGC0001001 | Jamaicamide       | 35 | 99.5  | 1420 | 0.0E+00  |
| CLR_cluster_034 | Type I PKS         | AIW82279  | BGC0001125 | Puwainaphycins    | 37 | 75.2  | 1498 | 0.0E+00  |
| CLR_cluster_040 | Type I PKS         | AIW82279  | BGC0001125 | Puwainaphycins    | 38 | 77.5  | 1467 | 0.0E+00  |
| CLR_cluster_047 | Type I PKS         | AIW82279  | BGC0001125 | Puwainaphycins    | 36 | 48.3  | 1308 | 0.0E+00  |
| CLR_cluster_050 | Type I PKS         | CAQ18828  | BGC0000954 | Ajudazol          | 42 | 84.3  | 535  | 1.2E-151 |
| CLR_cluster_053 | Type I PKS         | BAG17643  | BGC0001043 | SGR_PTMs          | 33 | 52.8  | 544  | 8.4E-154 |
| CLR_cluster_055 | Type I PKS         | AGC45622  | BGC0001394 | Phenalamide       | 34 | 49.3  | 529  | 1.6E-149 |
| CLR_cluster_056 | Type I PKS         | AIW82279  | BGC0001125 | Puwainaphycins    | 38 | 77.0  | 1512 | 0.0E+00  |
| CLR_cluster_057 | Type I PKS         | CAQ18829  | BGC0000954 | Ajudazol          | 44 | 83.0  | 529  | 8.3E-150 |
| CLR_cluster_058 | Type I PKS         | AIW82279  | BGC0001125 | Puwainaphycins    | 36 | 68.7  | 1376 | 0.0E+00  |
| CLR_cluster_059 | Type I PKS         | AAU04878  | BGC0000365 | Glycopeptidolipid | 49 | 98.4  | 689  | 6.0E-198 |
| CLR_cluster_062 | Type I PKS         | BAG17643  | BGC0001043 | SGR_PTMs          | 35 | 41.2  | 438  | 3.5E-122 |
| CLR_cluster_066 | Type I PKS         | AAU04878  | BGC0000365 | Glycopeptidolipid | 43 | 88.9  | 890  | 3.0E-258 |
| CLR_cluster_075 | Type I PKS         | AAK73514  | BGC0000015 | Amphotericin      | 36 | 102.3 | 1636 | 0.0E+00  |
| CLR_cluster_076 | Type I PKS         | BAG17643  | BGC0001043 | SGR_PTMs          | 35 | 102.1 | 512  | 9.0E-145 |
| CLR_cluster_080 | Type I PKS         | AAF26921  | BGC0000988 | Epothilone        | 38 | 90.1  | 895  | 1.1E-259 |
| CLR_cluster_087 | Type I PKS         | BAG17643  | BGC0001043 | SGR_PTMs          | 35 | 82.6  | 541  | 3.1E-153 |
| CLR_cluster_089 | Type I PKS         | BAG17643  | BGC0001043 | SGR_PTMs          | 35 | 65.3  | 515  | 1.7E-145 |
| CLR_cluster_093 | Type I PKS         | AIW82279  | BGC0001125 | Puwainaphycins    | 38 | 82.8  | 1433 | 0.0E+00  |

|                 |            |          |            |                    |    |       |      |          |
|-----------------|------------|----------|------------|--------------------|----|-------|------|----------|
| CLR_cluster_103 | Type I PKS | ACB46195 | BGC0000989 | Epothilone         | 40 | 69.2  | 906  | 6.0E-263 |
| CLR_cluster_106 | Type I PKS | BAG17643 | BGC0001043 | SGR_PTMs           | 34 | 82.3  | 540  | 4.3E-153 |
| CLR_cluster_107 | Type I PKS | BAG17643 | BGC0001043 | SGR_PTMs           | 35 | 48.8  | 548  | 4.5E-155 |
| CLR_cluster_108 | Type I PKS | BAG17643 | BGC0001043 | SGR_PTMs           | 35 | 97.3  | 506  | 6.7E-143 |
| CLR_cluster_117 | Type I PKS | BAK64637 | BGC0000135 | Reveromycin        | 38 | 96.4  | 875  | 1.2E-253 |
| CLR_cluster_123 | Type I PKS | AIW82279 | BGC0001125 | Puwainaphycins     | 36 | 100.9 | 1116 | 0.0E+00  |
| CLR_cluster_124 | Type I PKS | CAQ18828 | BGC0000954 | Ajudazol           | 44 | 87.7  | 846  | 3.8E-245 |
| CLR_cluster_125 | Type I PKS | AEU11006 | BGC0001029 | Nostophycin        | 39 | 109.2 | 567  | 3.3E-161 |
| CLR_cluster_130 | Type I PKS | ABX60162 | BGC0000978 | Cylindrospermopsin | 37 | 68.6  | 199  | 7.9E-51  |
| CLR_cluster_131 | Type I PKS | AGC45621 | BGC0001394 | Phenalamide        | 46 | 100.5 | 798  | 7.7E-231 |
| CLR_cluster_132 | Type I PKS | BAG17643 | BGC0001043 | SGR_PTMs           | 36 | 75.7  | 547  | 4.7E-155 |
| CLR_cluster_133 | Type I PKS | BAG17643 | BGC0001043 | SGR_PTMs           | 35 | 63.5  | 542  | 2.5E-153 |
| CLR_cluster_135 | Type I PKS | CAQ18828 | BGC0000954 | Ajudazol           | 44 | 101.4 | 782  | 5.1E-226 |
| CLR_cluster_136 | Type I PKS | CAQ18829 | BGC0000954 | Ajudazol           | 44 | 83.9  | 811  | 1.7E-234 |
| CLR_cluster_144 | Type I PKS | AAU04878 | BGC0000365 | Glycopeptidolipid  | 47 | 99.4  | 679  | 4.6E-195 |
| CLR_cluster_146 | Type I PKS | AIW82279 | BGC0001125 | Puwainaphycins     | 37 | 102.0 | 1018 | 9.0E-297 |
| CLR_cluster_149 | Type I PKS | AEE88280 | BGC0000976 | Curacin            | 36 | 100.5 | 950  | 2.2E-276 |
| CLR_cluster_153 | Type I PKS | AIW82279 | BGC0001125 | Puwainaphycins     | 37 | 99.6  | 970  | 2.0E-282 |
| CLR_cluster_154 | Type I PKS | AAF26921 | BGC0000988 | Epothilone         | 39 | 100.6 | 906  | 3.3E-263 |
| CLR_cluster_155 | Type I PKS | AAU04878 | BGC0000365 | Glycopeptidolipid  | 44 | 88.3  | 577  | 3.5E-164 |
| CLR_cluster_159 | Type I PKS | AAU04878 | BGC0000365 | Glycopeptidolipid  | 42 | 100.7 | 740  | 3.6E-213 |
| CLR_cluster_160 | Type I PKS | CAQ18829 | BGC0000954 | Ajudazol           | 43 | 97.7  | 1001 | 1.4E-291 |
| CLR_cluster_161 | Type I PKS | ABW96541 | BGC0000159 | Tautomycin         | 39 | 93.9  | 865  | 1.1E-250 |
| CLR_cluster_163 | Type I PKS | AIW82279 | BGC0001125 | Puwainaphycins     | 35 | 102.5 | 821  | 1.8E-237 |
| CLR_cluster_173 | Type I PKS | CAQ18829 | BGC0000954 | Ajudazol           | 45 | 91.3  | 865  | 7.6E-251 |
| CLR_cluster_174 | Type I PKS | AAU04878 | BGC0000365 | Glycopeptidolipid  | 44 | 100.5 | 678  | 8.4E-195 |
| CLR_cluster_175 | Type I PKS | AAF62883 | BGC0000991 | Epothilone         | 42 | 91.6  | 798  | 1.1E-230 |
| CLR_cluster_176 | Type I PKS | BAG17643 | BGC0001043 | SGR_PTMs           | 33 | 90.5  | 527  | 4.7E-149 |
| CLR_cluster_177 | Type I PKS | BAG17643 | BGC0001043 | SGR_PTMs           | 36 | 96.7  | 548  | 1.6E-155 |
| CLR_cluster_180 | Type I PKS | AIW82279 | BGC0001125 | Puwainaphycins     | 34 | 103.0 | 700  | 5.0E-201 |
| CLR_cluster_181 | Type I PKS | AAU04878 | BGC0000365 | Glycopeptidolipid  | 37 | 99.3  | 539  | 1.1E-152 |
| CLR_cluster_183 | Type I PKS | CAQ18829 | BGC0000954 | Ajudazol           | 44 | 83.8  | 493  | 5.8E-139 |

|                 |              |          |            |                    |    |       |     |          |
|-----------------|--------------|----------|------------|--------------------|----|-------|-----|----------|
| CLR_cluster_192 | Type I PKS   | CAQ18828 | BGC0000954 | Ajudazol           | 43 | 100.2 | 790 | 1.9E-228 |
| CLR_cluster_194 | Type I PKS   | AAU04878 | BGC0000365 | Glycopeptidolipid  | 43 | 97.6  | 718 | 1.1E-206 |
| CLR_cluster_197 | Type I PKS   | CAQ18829 | BGC0000954 | Ajudazol           | 42 | 97.7  | 667 | 3.1E-191 |
| CLR_cluster_202 | Type I PKS   | CAQ18834 | BGC0000954 | Ajudazol           | 38 | 101.2 | 412 | 1.3E-114 |
| CLR_cluster_203 | Type I PKS   | AAU04878 | BGC0000365 | Glycopeptidolipid  | 44 | 98.9  | 742 | 6.8E-214 |
| CLR_cluster_206 | Type I PKS   | AGC45620 | BGC0001394 | Phenalamide        | 42 | 86.8  | 579 | 5.4E-165 |
| CLR_cluster_208 | Type I PKS   | CAQ18829 | BGC0000954 | Ajudazol           | 43 | 94.3  | 536 | 4.6E-152 |
| CLR_cluster_212 | Type I PKS   | AAU04878 | BGC0000365 | Glycopeptidolipid  | 44 | 99.3  | 613 | 3.2E-175 |
| CLR_cluster_218 | Type I PKS   | AAU04878 | BGC0000365 | Glycopeptidolipid  | 46 | 99.1  | 691 | 1.6E-198 |
| CLR_cluster_219 | Type I PKS   | CAQ18828 | BGC0000954 | Ajudazol           | 46 | 99.8  | 646 | 3.3E-185 |
| CLR_cluster_222 | Type I PKS   | CAQ18828 | BGC0000954 | Ajudazol           | 45 | 101.2 | 672 | 7.5E-193 |
| CLR_cluster_225 | Type I PKS   | CAQ18829 | BGC0000954 | Ajudazol           | 47 | 101.1 | 640 | 3.1E-183 |
| CLR_cluster_234 | Type I PKS   | CAQ18828 | BGC0000954 | Ajudazol           | 45 | 101.7 | 558 | 1.4E-158 |
| CLR_cluster_235 | Type I PKS   | BAG17643 | BGC0001043 | SGR_PTM            | 35 | 102.7 | 368 | 2.6E-101 |
| CLR_cluster_242 | Type I PKS   | AGC45620 | BGC0001394 | Phenalamide        | 48 | 98.9  | 562 | 8.8E-160 |
| CLR_cluster_245 | Type I PKS   | AHB82052 | BGC0001019 | Microsclerodermins | 37 | 101.2 | 265 | 1.6E-70  |
| CLR_cluster_246 | Type I PKS   | AAU04878 | BGC0000365 | Glycopeptidolipid  | 46 | 74.9  | 374 | 2.5E-103 |
| CLR_cluster_247 | Type I PKS   | CBD77732 | BGC0000974 | Crocacin           | 40 | 65.2  | 280 | 4.9E-75  |
| CLR_cluster_248 | Type I PKS   | AEU11005 | BGC0001029 | Nostophycin        | 40 | 93.3  | 418 | 1.5E-116 |
| CLR_cluster_249 | Type I PKS   | AIW82282 | BGC0001125 | Puwainaphycins     | 42 | 79.9  | 416 | 4.4E-116 |
| CLR_cluster_250 | Type I PKS   | AAU04878 | BGC0000365 | Glycopeptidolipid  | 39 | 102.1 | 402 | 8.4E-112 |
| CLR_cluster_255 | Type I PKS   | CAQ18828 | BGC0000954 | Ajudazol           | 41 | 99.2  | 369 | 7.3E-102 |
| CLR_cluster_265 | Type I PKS   | CBD77732 | BGC0000974 | Crocacin           | 38 | 102.0 | 295 | 1.1E-79  |
| CLR_cluster_268 | Type I PKS   | ABX60162 | BGC0000978 | Cylindrospermopsin | 38 | 101.5 | 313 | 4.8E-85  |
| CLR_cluster_278 | Type I PKS   | AAF62883 | BGC0000991 | Epothilone         | 41 | 117.5 | 312 | 5.0E-85  |
| CLR_cluster_279 | Type II PKS  | ABP54674 | BGC0000241 | Lomaiviticin       | 31 | 101.8 | 129 | 9.3E-30  |
| CLR_cluster_243 | Type III PKS | BAG17301 | BGC0000282 | Alkylresorcinol    | 39 | 101.5 | 208 | 9.1E-54  |
| CLR_cluster_263 | Type III PKS | BAG17301 | BGC0000282 | Alkylresorcinol    | 40 | 101.7 | 227 | 3.3E-59  |
| CLR_cluster_270 | Type III PKS | BAG17301 | BGC0000282 | Alkylresorcinol    | 31 | 97.5  | 193 | 3.3E-49  |

Table S15. BLAST search of the BGCs identified from the metagenome of *Rhabdastrella globostellata* against the MiBIG database

| BGC ID          | Predicted BGC type | MiBIG Protein | MiBIG Cluster | MiBIG Product         | Identity (%) | Coverage (%) | BLAST Score | E-value  |
|-----------------|--------------------|---------------|---------------|-----------------------|--------------|--------------|-------------|----------|
| RHG_cluster_046 | Arylpolyene        | AAO39098      | BGC0000956    | Andrimid              | 34           | 63.7         | 314         | 5.0E-85  |
| RHG_cluster_061 | Arylpolyene        | CUI25675      | BGC0001353    | Thiolactomycin        | 38           | 88.2         | 193         | 6.1E-49  |
| RHG_cluster_120 | Arylpolyene        | AAW85355      | BGC0000837    | APE_Vf                | 57           | 100.0        | 423         | 2.5E-118 |
| RHG_cluster_121 | Arylpolyene        | AAW85352      | BGC0000837    | APE_Vf                | 38           | 97.8         | 240         | 2.6E-63  |
| RHG_cluster_125 | Arylpolyene        | AAW85352      | BGC0000837    | APE_Vf                | 45           | 82.9         | 277         | 2.5E-74  |
| RHG_cluster_134 | Arylpolyene        | ANY57968      | BGC0001369    | Metatricycloene       | 34           | 91.9         | 321         | 3.1E-87  |
| RHG_cluster_184 | Arylpolyene        | ADI58650      | BGC0000187    | Asukamycin            | 40           | 61.6         | 212         | 1.6E-54  |
| RHG_cluster_231 | Arylpolyene        | AAN79648      | BGC0000836    | APE_Ec                | 57           | 99.0         | 498         | 5.4E-141 |
| RHG_cluster_232 | Arylpolyene        | AAW85352      | BGC0000837    | APE_Vf                | 42           | 95.6         | 239         | 5.9E-63  |
| RHG_cluster_253 | Arylpolyene        | AHA12083      | BGC0001172    | Chlorizidine_A        | 35           | 99.5         | 177         | 2.9E-44  |
| RHG_cluster_005 | Bacteriocin        | CAO82084      | BGC0000473    | Microcyclamide        | 42           | 100.9        | 532         | 8.2E-151 |
| RHG_cluster_021 | Bacteriocin        | ZP_00672901   | BGC0000481    | Trichamide            | 39           | 99.1         | 534         | 2.2E-151 |
| RHG_cluster_024 | Bacteriocin        | -             | -             | -                     | -            | -            | -           | -        |
| RHG_cluster_025 | Bacteriocin        | ACA04490      | BGC0000477    | Patellin_2/patellin_3 | 40           | 103.4        | 528         | 1.5E-149 |
| RHG_cluster_032 | Bacteriocin        | ZP_00672901   | BGC0000481    | Trichamide            | 39           | 102.8        | 515         | 1.0E-145 |
| RHG_cluster_038 | Bacteriocin        | BAE46919      | BGC0000565    | Goadsporin            | 44           | 96.2         | 558         | 1.1E-158 |
| RHG_cluster_083 | Bacteriocin        | BAE46919      | BGC0000565    | Goadsporin            | 44           | 95.7         | 569         | 8.0E-162 |
| RHG_cluster_092 | Bacteriocin        | BAP82649      | BGC0001148    | Pheganomycin          | 39           | 96.1         | 435         | 1.5E-121 |
| RHG_cluster_115 | Bacteriocin        | CCH92967      | BGC0000483    | Aeruginosamide        | 41           | 101.6        | 539         | 5.2E-153 |
| RHG_cluster_139 | Bacteriocin        | BAE46919      | BGC0000565    | Goadsporin            | 44           | 97.6         | 556         | 4.0E-158 |
| RHG_cluster_181 | Bacteriocin        | CCH92967      | BGC0000483    | Aeruginosamide        | 42           | 101.0        | 560         | 3.7E-159 |
| RHG_cluster_189 | Bacteriocin        | -             | -             | -                     | -            | -            | -           | -        |
| RHG_cluster_251 | Bacteriocin        | -             | -             | -                     | -            | -            | -           | -        |
| RHG_cluster_257 | Bacteriocin        | ACA04483      | BGC0000480    | Tenucyclamide_A/C     | 39           | 100.8        | 423         | 5.8E-118 |
| RHG_cluster_297 | Bacteriocin        | WP_006126653  | BGC0000554    | SRO15-3108            | 36           | 72.8         | 414         | 3.2E-115 |
| RHG_cluster_325 | Bacteriocin        | -             | -             | -                     | -            | -            | -           | -        |
| RHG_cluster_004 | Cf_fatty_acid      | ALV82456      | BGC0001382    | Svaricin              | 48           | 97.4         | 367         | 2.5E-101 |
| RHG_cluster_007 | Cf_fatty_acid      | ALV82456      | BGC0001382    | Svaricin              | 48           | 99.3         | 379         | 3.6E-105 |
| RHG_cluster_009 | Cf_fatty_acid      | ALV82456      | BGC0001382    | Svaricin              | 47           | 98.5         | 362         | 7.9E-100 |

|                 |               |          |            |                    |    |       |     |          |
|-----------------|---------------|----------|------------|--------------------|----|-------|-----|----------|
| RHG_cluster_010 | Cf_fatty_acid | CAA16179 | BGC0001063 | Undecylprodigiosin | 45 | 97.6  | 264 | 1.8E-70  |
| RHG_cluster_012 | Cf_fatty_acid | ALV82456 | BGC0001382 | Svaricin           | 46 | 98.8  | 349 | 5.3E-96  |
| RHG_cluster_018 | Cf_fatty_acid | ALV82456 | BGC0001382 | Svaricin           | 44 | 99.0  | 354 | 2.1E-97  |
| RHG_cluster_020 | Cf_fatty_acid | ALV82456 | BGC0001382 | Svaricin           | 50 | 98.1  | 387 | 1.8E-107 |
| RHG_cluster_023 | Cf_fatty_acid | ALV82456 | BGC0001382 | Svaricin           | 46 | 98.1  | 364 | 1.2E-100 |
| RHG_cluster_030 | Cf_fatty_acid | AHA12083 | BGC0001172 | Chlorizidine_A     | 46 | 97.1  | 309 | 8.0E-84  |
| RHG_cluster_031 | Cf_fatty_acid | ALV82456 | BGC0001382 | Svaricin           | 50 | 98.3  | 398 | 1.0E-110 |
| RHG_cluster_033 | Cf_fatty_acid | ALV82456 | BGC0001382 | Svaricin           | 38 | 101.2 | 279 | 6.6E-75  |
| RHG_cluster_035 | Cf_fatty_acid | ALV82456 | BGC0001382 | Svaricin           | 46 | 99.3  | 367 | 1.9E-101 |
| RHG_cluster_039 | Cf_fatty_acid | CAA16177 | BGC0001063 | Undecylprodigiosin | 49 | 97.4  | 366 | 3.2E-101 |
| RHG_cluster_045 | Cf_fatty_acid | AIL50179 | BGC0000213 | Colabomycin        | 27 | 103.6 | 89  | 1.2E-17  |
| RHG_cluster_049 | Cf_fatty_acid | ALV82456 | BGC0001382 | Svaricin           | 47 | 99.8  | 382 | 7.3E-106 |
| RHG_cluster_051 | Cf_fatty_acid | AHF22848 | BGC0000091 | Marineosin         | 45 | 103.1 | 303 | 4.1E-82  |
| RHG_cluster_059 | Cf_fatty_acid | CAA16177 | BGC0001063 | Undecylprodigiosin | 44 | 103.1 | 279 | 6.4E-75  |
| RHG_cluster_065 | Cf_fatty_acid | ALV82456 | BGC0001382 | Svaricin           | 48 | 98.4  | 376 | 4.2E-104 |
| RHG_cluster_068 | Cf_fatty_acid | ALV82456 | BGC0001382 | Svaricin           | 48 | 99.3  | 376 | 3.1E-104 |
| RHG_cluster_073 | Cf_fatty_acid | ABQ04139 | BGC0000838 | Flexirubin         | 40 | 100.5 | 294 | 1.5E-79  |
| RHG_cluster_074 | Cf_fatty_acid | ALV82456 | BGC0001382 | Svaricin           | 41 | 102.0 | 245 | 1.0E-64  |
| RHG_cluster_075 | Cf_fatty_acid | ALV82456 | BGC0001382 | Svaricin           | 48 | 98.1  | 354 | 1.3E-97  |
| RHG_cluster_077 | Cf_fatty_acid | CAA16177 | BGC0001063 | Undecylprodigiosin | 47 | 96.0  | 357 | 2.6E-98  |
| RHG_cluster_078 | Cf_fatty_acid | ALV82456 | BGC0001382 | Svaricin           | 30 | 90.0  | 139 | 8.7E-33  |
| RHG_cluster_079 | Cf_fatty_acid | ALV82456 | BGC0001382 | Svaricin           | 39 | 100.0 | 269 | 7.1E-72  |
| RHG_cluster_081 | Cf_fatty_acid | ALV82456 | BGC0001382 | Svaricin           | 44 | 98.4  | 307 | 3.2E-83  |
| RHG_cluster_084 | Cf_fatty_acid | ALV82456 | BGC0001382 | Svaricin           | 50 | 98.3  | 370 | 2.3E-102 |
| RHG_cluster_085 | Cf_fatty_acid | AHF22848 | BGC0000091 | Marineosin         | 46 | 103.8 | 305 | 8.4E-83  |
| RHG_cluster_086 | Cf_fatty_acid | ALV82456 | BGC0001382 | Svaricin           | 49 | 98.8  | 377 | 1.8E-104 |
| RHG_cluster_089 | Cf_fatty_acid | CAA16179 | BGC0001063 | Undecylprodigiosin | 44 | 94.2  | 260 | 3.5E-69  |
| RHG_cluster_095 | Cf_fatty_acid | CAA16177 | BGC0001063 | Undecylprodigiosin | 37 | 87.6  | 186 | 4.4E-47  |
| RHG_cluster_097 | Cf_fatty_acid | ALV82456 | BGC0001382 | Svaricin           | 48 | 97.7  | 368 | 1.1E-101 |
| RHG_cluster_098 | Cf_fatty_acid | ALV82456 | BGC0001382 | Svaricin           | 46 | 98.5  | 346 | 5.9E-95  |
| RHG_cluster_099 | Cf_fatty_acid | CAA16179 | BGC0001063 | Undecylprodigiosin | 41 | 98.5  | 243 | 4.3E-64  |
| RHG_cluster_103 | Cf_fatty_acid | ACA34361 | BGC0001152 | Fusaricidin        | 50 | 90.4  | 345 | 7.1E-95  |

|                 |               |          |            |                              |    |       |     |          |
|-----------------|---------------|----------|------------|------------------------------|----|-------|-----|----------|
| RHG_cluster_108 | Cf_fatty_acid | ABQ04139 | BGC0000838 | Flexirubin                   | 41 | 100.7 | 294 | 1.5E-79  |
| RHG_cluster_112 | Cf_fatty_acid | CAA16179 | BGC0001063 | Undecylprodigiosin           | 45 | 97.0  | 265 | 1.1E-70  |
| RHG_cluster_114 | Cf_fatty_acid | ALV82456 | BGC0001382 | Svaricin                     | 48 | 98.0  | 375 | 9.0E-104 |
| RHG_cluster_122 | Cf_fatty_acid | ALV82456 | BGC0001382 | Svaricin                     | 48 | 98.5  | 374 | 1.2E-103 |
| RHG_cluster_127 | Cf_fatty_acid | ALV82456 | BGC0001382 | Svaricin                     | 48 | 98.8  | 370 | 2.9E-102 |
| RHG_cluster_130 | Cf_fatty_acid | ALV82456 | BGC0001382 | Svaricin                     | 49 | 99.3  | 360 | 2.3E-99  |
| RHG_cluster_133 | Cf_fatty_acid | AJO72736 | BGC0001381 | Brasilinolide                | 28 | 46.6  | 62  | 1.4E-09  |
| RHG_cluster_138 | Cf_fatty_acid | ALV82456 | BGC0001382 | Svaricin                     | 46 | 99.0  | 362 | 7.9E-100 |
| RHG_cluster_141 | Cf_fatty_acid | CAA16179 | BGC0001063 | Undecylprodigiosin           | 35 | 84.4  | 161 | 1.4E-39  |
| RHG_cluster_142 | Cf_fatty_acid | ALV82456 | BGC0001382 | Svaricin                     | 48 | 100.2 | 363 | 3.6E-100 |
| RHG_cluster_143 | Cf_fatty_acid | ALV82456 | BGC0001382 | Svaricin                     | 45 | 99.0  | 345 | 1.0E-94  |
| RHG_cluster_144 | Cf_fatty_acid | ALV82456 | BGC0001382 | Svaricin                     | 49 | 99.3  | 390 | 2.1E-108 |
| RHG_cluster_148 | Cf_fatty_acid | AHF22848 | BGC0000091 | Marineosin                   | 40 | 101.9 | 267 | 2.6E-71  |
| RHG_cluster_150 | Cf_fatty_acid | AFJ52674 | BGC0001073 | Kosinostatin                 | 44 | 99.0  | 331 | 1.2E-90  |
| RHG_cluster_151 | Cf_fatty_acid | ALV82456 | BGC0001382 | Svaricin                     | 46 | 99.0  | 338 | 1.2E-92  |
| RHG_cluster_153 | Cf_fatty_acid | ABQ04139 | BGC0000838 | Flexirubin                   | 40 | 100.7 | 292 | 7.6E-79  |
| RHG_cluster_155 | Cf_fatty_acid | ALV82456 | BGC0001382 | Svaricin                     | 49 | 98.1  | 349 | 7.1E-96  |
| RHG_cluster_156 | Cf_fatty_acid | ABQ04139 | BGC0000838 | Flexirubin                   | 42 | 99.0  | 287 | 3.2E-77  |
| RHG_cluster_172 | Cf_fatty_acid | ALV82456 | BGC0001382 | Svaricin                     | 50 | 96.7  | 382 | 5.7E-106 |
| RHG_cluster_173 | Cf_fatty_acid | CAA16179 | BGC0001063 | Undecylprodigiosin           | 43 | 97.3  | 254 | 1.4E-67  |
| RHG_cluster_175 | Cf_fatty_acid | CAA16179 | BGC0001063 | Undecylprodigiosin           | 46 | 95.4  | 255 | 1.1E-67  |
| RHG_cluster_176 | Cf_fatty_acid | ALV82391 | BGC0001370 | Lipopeptide_8D1-1/8D1-2      | 33 | 50.5  | 124 | 4.4E-28  |
| RHG_cluster_178 | Cf_fatty_acid | ALV82456 | BGC0001382 | Svaricin                     | 46 | 98.1  | 346 | 3.5E-95  |
| RHG_cluster_182 | Cf_fatty_acid | CBJ83012 | BGC0000189 | Xenocylins                   | 50 | 76.7  | 458 | 1.6E-128 |
| RHG_cluster_185 | Cf_fatty_acid | ALV82456 | BGC0001382 | Svaricin                     | 47 | 98.1  | 369 | 6.5E-102 |
| RHG_cluster_186 | Cf_fatty_acid | CAA16179 | BGC0001063 | Undecylprodigiosin           | 48 | 96.2  | 270 | 2.0E-72  |
| RHG_cluster_188 | Cf_fatty_acid | ALV82456 | BGC0001382 | Svaricin                     | 48 | 98.3  | 386 | 5.1E-107 |
| RHG_cluster_190 | Cf_fatty_acid | CAB38890 | BGC0000315 | Calcium-dependent_antibiotic | 43 | 88.5  | 231 | 1.9E-60  |
| RHG_cluster_196 | Cf_fatty_acid | CAA16179 | BGC0001063 | Undecylprodigiosin           | 40 | 87.1  | 224 | 1.8E-58  |
| RHG_cluster_211 | Cf_fatty_acid | CAA16179 | BGC0001063 | Undecylprodigiosin           | 47 | 91.9  | 274 | 1.9E-73  |
| RHG_cluster_212 | Cf_fatty_acid | AHF22848 | BGC0000091 | Marineosin                   | 44 | 105.6 | 289 | 8.0E-78  |
| RHG_cluster_214 | Cf_fatty_acid | ALV82456 | BGC0001382 | Svaricin                     | 45 | 100.2 | 361 | 1.8E-99  |

|                 |               |             |            |                              |    |       |     |          |
|-----------------|---------------|-------------|------------|------------------------------|----|-------|-----|----------|
| RHG_cluster_216 | Cf_fatty_acid | ALV82456    | BGC0001382 | Svaricin                     | 48 | 99.8  | 365 | 7.3E-101 |
| RHG_cluster_218 | Cf_fatty_acid | ALV82456    | BGC0001382 | Svaricin                     | 49 | 98.8  | 396 | 2.9E-110 |
| RHG_cluster_220 | Cf_fatty_acid | ALV82456    | BGC0001382 | Svaricin                     | 48 | 100.2 | 363 | 3.6E-100 |
| RHG_cluster_222 | Cf_fatty_acid | ALV82456    | BGC0001382 | Svaricin                     | 48 | 98.3  | 366 | 4.3E-101 |
| RHG_cluster_225 | Cf_fatty_acid | ALV82456    | BGC0001382 | Svaricin                     | 48 | 99.0  | 389 | 6.0E-108 |
| RHG_cluster_227 | Cf_fatty_acid | ALV82456    | BGC0001382 | Svaricin                     | 47 | 98.8  | 367 | 2.4E-101 |
| RHG_cluster_228 | Cf_fatty_acid | CAA16179    | BGC0001063 | Undecylprodigiosin           | 46 | 94.8  | 269 | 5.9E-72  |
| RHG_cluster_235 | Cf_fatty_acid | ALV82456    | BGC0001382 | Svaricin                     | 46 | 99.3  | 367 | 1.9E-101 |
| RHG_cluster_236 | Cf_fatty_acid | CAA16177    | BGC0001063 | Undecylprodigiosin           | 44 | 102.8 | 297 | 2.3E-80  |
| RHG_cluster_239 | Cf_fatty_acid | ctg1_orf534 | BGC0001199 | Akaeolide                    | 42 | 97.1  | 223 | 2.8E-58  |
| RHG_cluster_241 | Cf_fatty_acid | ACU59351    | BGC0000839 | Flexirubin                   | 44 | 100.2 | 320 | 3.4E-87  |
| RHG_cluster_244 | Cf_fatty_acid | ALV82456    | BGC0001382 | Svaricin                     | 47 | 98.1  | 351 | 1.4E-96  |
| RHG_cluster_245 | Cf_fatty_acid | CAB38890    | BGC0000315 | Calcium-dependent_antibiotic | 42 | 89.1  | 229 | 6.9E-60  |
| RHG_cluster_250 | Cf_fatty_acid | ACU59351    | BGC0000839 | Flexirubin                   | 42 | 101.5 | 272 | 6.1E-73  |
| RHG_cluster_254 | Cf_fatty_acid | AEK75497    | BGC0000001 | Abyssomicin                  | 26 | 85.7  | 61  | 3.1E-09  |
| RHG_cluster_259 | Cf_fatty_acid | AHF22848    | BGC0000091 | Marineosin                   | 46 | 103.0 | 303 | 3.2E-82  |
| RHG_cluster_263 | Cf_fatty_acid | ALV82456    | BGC0001382 | Svaricin                     | 46 | 99.0  | 366 | 4.2E-101 |
| RHG_cluster_264 | Cf_fatty_acid | AHA12083    | BGC0001172 | Chlorizidine_A               | 45 | 97.6  | 305 | 1.2E-82  |
| RHG_cluster_265 | Cf_fatty_acid | ACA34361    | BGC0001152 | Fusaricidin                  | 49 | 90.5  | 343 | 3.6E-94  |
| RHG_cluster_270 | Cf_fatty_acid | -           | -          | -                            | -  | -     | -   | -        |
| RHG_cluster_271 | Cf_fatty_acid | ALV82456    | BGC0001382 | Svaricin                     | 47 | 90.0  | 354 | 2.2E-97  |
| RHG_cluster_273 | Cf_fatty_acid | AHF22848    | BGC0000091 | Marineosin                   | 47 | 102.5 | 309 | 4.4E-84  |
| RHG_cluster_274 | Cf_fatty_acid | ALV82456    | BGC0001382 | Svaricin                     | 48 | 99.0  | 370 | 2.9E-102 |
| RHG_cluster_275 | Cf_fatty_acid | ACA34361    | BGC0001152 | Fusaricidin                  | 44 | 96.4  | 314 | 2.2E-85  |
| RHG_cluster_277 | Cf_fatty_acid | ALV82456    | BGC0001382 | Svaricin                     | 50 | 98.8  | 387 | 1.8E-107 |
| RHG_cluster_278 | Cf_fatty_acid | ACU59351    | BGC0000839 | Flexirubin                   | 41 | 100.2 | 293 | 4.5E-79  |
| RHG_cluster_281 | Cf_fatty_acid | ALV82456    | BGC0001382 | Svaricin                     | 47 | 98.3  | 357 | 2.0E-98  |
| RHG_cluster_286 | Cf_fatty_acid | CCP20057    | BGC0001119 | Divergolide                  | 43 | 97.3  | 227 | 1.9E-59  |
| RHG_cluster_292 | Cf_fatty_acid | ABQ04139    | BGC0000838 | Flexirubin                   | 42 | 101.4 | 267 | 1.8E-71  |
| RHG_cluster_293 | Cf_fatty_acid | CAA16179    | BGC0001063 | Undecylprodigiosin           | 40 | 98.2  | 241 | 1.3E-63  |
| RHG_cluster_301 | Cf_fatty_acid | ALV82456    | BGC0001382 | Svaricin                     | 49 | 99.0  | 381 | 9.7E-106 |
| RHG_cluster_303 | Cf_fatty_acid | ABQ04139    | BGC0000838 | Flexirubin                   | 39 | 100.2 | 270 | 2.4E-72  |

|                 |               |              |            |                    |    |       |     |          |
|-----------------|---------------|--------------|------------|--------------------|----|-------|-----|----------|
| RHG_cluster_305 | Cf_fatty_acid | ALV82456     | BGC0001382 | Svaricin           | 49 | 99.0  | 371 | 1.3E-102 |
| RHG_cluster_310 | Cf_fatty_acid | ALV82456     | BGC0001382 | Svaricin           | 47 | 99.5  | 329 | 5.3E-90  |
| RHG_cluster_313 | Cf_fatty_acid | ALV82456     | BGC0001382 | Svaricin           | 48 | 97.4  | 370 | 2.2E-102 |
| RHG_cluster_315 | Cf_fatty_acid | ALV82456     | BGC0001382 | Svaricin           | 48 | 98.4  | 326 | 5.6E-89  |
| RHG_cluster_317 | Cf_fatty_acid | ALV82456     | BGC0001382 | Svaricin           | 50 | 98.3  | 356 | 3.4E-98  |
| RHG_cluster_319 | Cf_fatty_acid | CAA16177     | BGC0001063 | Undecylprodigiosin | 50 | 99.3  | 386 | 3.0E-107 |
| RHG_cluster_321 | Cf_fatty_acid | ACA34361     | BGC0001152 | Fusaricidin        | 52 | 95.4  | 368 | 9.9E-102 |
| RHG_cluster_324 | Cf_fatty_acid | ALV82456     | BGC0001382 | Svaricin           | 44 | 99.3  | 347 | 2.6E-95  |
| RHG_cluster_328 | Cf_fatty_acid | CAC36759     | BGC0000914 | Methylenomycin     | 41 | 97.6  | 232 | 9.9E-61  |
| RHG_cluster_332 | Cf_fatty_acid | ALV82456     | BGC0001382 | Svaricin           | 43 | 99.7  | 312 | 6.9E-85  |
| RHG_cluster_334 | Cf_fatty_acid | ALV82456     | BGC0001382 | Svaricin           | 46 | 99.3  | 349 | 6.8E-96  |
| RHG_cluster_343 | Cf_fatty_acid | ACA34361     | BGC0001152 | Fusaricidin        | 51 | 95.6  | 351 | 1.2E-96  |
| RHG_cluster_344 | Cf_fatty_acid | ALV82456     | BGC0001382 | Svaricin           | 48 | 98.8  | 373 | 3.4E-103 |
| RHG_cluster_347 | Cf_fatty_acid | ALV82456     | BGC0001382 | Svaricin           | 47 | 98.1  | 361 | 1.0E-99  |
| RHG_cluster_348 | Cf_fatty_acid | ALV82456     | BGC0001382 | Svaricin           | 42 | 98.3  | 320 | 2.7E-87  |
| RHG_cluster_352 | Cf_fatty_acid | ABQ04139     | BGC0000838 | Flexirubin         | 41 | 100.6 | 251 | 1.2E-66  |
| RHG_cluster_355 | Cf_fatty_acid | ACA34361     | BGC0001152 | Fusaricidin        | 50 | 100.0 | 326 | 3.0E-89  |
| RHG_cluster_359 | Cf_fatty_acid | ALV82456     | BGC0001382 | Svaricin           | 49 | 98.6  | 363 | 3.2E-100 |
| RHG_cluster_360 | Cf_fatty_acid | AEE65468     | BGC0000223 | Fluostatin         | 42 | 99.5  | 304 | 1.5E-82  |
| RHG_cluster_365 | Cf_fatty_acid | ACA34361     | BGC0001152 | Fusaricidin        | 46 | 98.8  | 286 | 3.5E-77  |
| RHG_cluster_044 | Ladderane     | CAL48955     | BGC0001343 | Aurachin           | 38 | 97.4  | 254 | 1.8E-67  |
| RHG_cluster_111 | Ladderane     | ANY57968     | BGC0001369 | Metatricycloene    | 38 | 64.0  | 239 | 9.2E-63  |
| RHG_cluster_116 | Ladderane     | ANY57968     | BGC0001369 | Metatricycloene    | 37 | 72.5  | 234 | 3.9E-61  |
| RHG_cluster_132 | Ladderane     | CAL48955     | BGC0001343 | Aurachin           | 39 | 98.3  | 258 | 1.6E-68  |
| RHG_cluster_093 | Lantipeptide  | WP_006126651 | BGC0000554 | SRO15-3108         | 29 | 105.2 | 279 | 1.3E-74  |
| RHG_cluster_001 | Other         | ABF88003     | BGC0000871 | VEPE/AEPE/TG-1     | 30 | 104.8 | 594 | 2.5E-169 |
| RHG_cluster_022 | Other         | ABF88003     | BGC0000871 | VEPE/AEPE/TG-1     | 26 | 106.5 | 232 | 2.5E-60  |
| RHG_cluster_029 | Other         | ABF88003     | BGC0000871 | VEPE/AEPE/TG-1     | 29 | 108.1 | 285 | 2.0E-76  |
| RHG_cluster_048 | Other         | ABF88003     | BGC0000871 | VEPE/AEPE/TG-1     | 29 | 106.6 | 508 | 2.3E-143 |
| RHG_cluster_064 | Other         | ABF88003     | BGC0000871 | VEPE/AEPE/TG-1     | 30 | 96.6  | 283 | 7.4E-76  |
| RHG_cluster_066 | Other         | BAB69698     | BGC0001098 | Iturin             | 37 | 101.1 | 445 | 8.5E-125 |
| RHG_cluster_070 | Other         | BAE93741     | BGC0000164 | Tetronomycin       | 38 | 60.6  | 334 | 3.1E-91  |



|                 |             |           |            |                    |    |       |     |          |
|-----------------|-------------|-----------|------------|--------------------|----|-------|-----|----------|
| RHG_cluster_082 | Other       | ACR50797  | BGC0000163 | Tetronasin         | 39 | 63.7  | 356 | 7.5E-98  |
| RHG_cluster_088 | Other       | ABF87031  | BGC0000393 | Myxoprincomide     | 42 | 53.9  | 364 | 5.2E-100 |
| RHG_cluster_110 | Other       | AAO23334  | BGC0000397 | Nostocyclopeptide  | 33 | 97.7  | 464 | 2.7E-130 |
| RHG_cluster_126 | Other       | CAQ71826  | BGC0001189 | Taiwachelin        | 40 | 57.7  | 345 | 2.3E-94  |
| RHG_cluster_131 | Other       | ACR50797  | BGC0000163 | Tetronasin         | 37 | 63.6  | 329 | 1.7E-89  |
| RHG_cluster_171 | Other       | ABF88003  | BGC0000871 | VEPE/AEPE/TG-1     | 34 | 99.2  | 447 | 3.0E-125 |
| RHG_cluster_187 | Other       | ABF88003  | BGC0000871 | VEPE/AEPE/TG-1     | 32 | 76.1  | 212 | 2.7E-54  |
| RHG_cluster_205 | Other       | CAA16183  | BGC0001063 | Undecylprodigiosin | 38 | 56.6  | 299 | 1.6E-80  |
| RHG_cluster_210 | Other       | ABF88003  | BGC0000871 | VEPE/AEPE/TG-1     | 42 | 100.8 | 565 | 1.1E-160 |
| RHG_cluster_223 | Other       | ABF87031  | BGC0000393 | Myxoprincomide     | 41 | 54.9  | 354 | 4.1E-97  |
| RHG_cluster_260 | Other       | ABF88003  | BGC0000871 | VEPE/AEPE/TG-1     | 30 | 89.0  | 260 | 7.9E-69  |
| RHG_cluster_287 | Other       | ABF87031  | BGC0000393 | Myxoprincomide     | 42 | 60.3  | 363 | 6.1E-100 |
| RHG_cluster_300 | Other       | ABF88003  | BGC0000871 | VEPE/AEPE/TG-1     | 32 | 78.5  | 288 | 2.5E-77  |
| RHG_cluster_312 | Other       | BAK64635  | BGC0000135 | Reveromycin        | 40 | 60.5  | 356 | 1.0E-97  |
| RHG_cluster_329 | Other       | ABF88003  | BGC0000871 | VEPE/AEPE/TG-1     | 36 | 95.0  | 422 | 9.6E-118 |
| RHG_cluster_333 | Other       | ABF88003  | BGC0000871 | VEPE/AEPE/TG-1     | 34 | 101.4 | 407 | 4.0E-113 |
| RHG_cluster_339 | Other       | ABF87031  | BGC0000393 | Myxoprincomide     | 40 | 74.9  | 227 | 4.2E-59  |
| RHG_cluster_346 | Other       | ABF88003  | BGC0000871 | VEPE/AEPE/TG-1     | 28 | 104.2 | 205 | 1.4E-52  |
| RHG_cluster_349 | Other       | ABF88003  | BGC0000871 | VEPE/AEPE/TG-1     | 48 | 102.6 | 528 | 8.9E-150 |
| RHG_cluster_361 | Other       | ABF88003  | BGC0000871 | VEPE/AEPE/TG-1     | 35 | 102.0 | 219 | 6.2E-57  |
| RHG_cluster_368 | Other       | ABF88003  | BGC0000871 | VEPE/AEPE/TG-1     | 30 | 90.5  | 144 | 2.3E-34  |
| RHG_cluster_371 | Other       | ABF88003  | BGC0000871 | VEPE/AEPE/TG-1     | 31 | 95.2  | 100 | 3.5E-21  |
| RHG_cluster_166 | Phosphonate | ADB43073  | BGC0000926 | Rhizocticin        | 50 | 51.9  | 280 | 4.0E-75  |
| RHG_cluster_230 | Phosphonate | ADB43073  | BGC0000926 | Rhizocticin        | 44 | 54.6  | 249 | 7.5E-66  |
| RHG_cluster_290 | Phosphonate | ADB43073  | BGC0000926 | Rhizocticin        | 48 | 50.6  | 255 | 1.4E-67  |
| RHG_cluster_291 | Phosphonate | CAJ14044  | BGC0000406 | Phosphinothricin   | 48 | 55.1  | 270 | 3.2E-72  |
| RHG_cluster_370 | Phosphonate | ADB43073  | BGC0000926 | Rhizocticin        | 51 | 74.9  | 253 | 4.3E-67  |
| RHG_cluster_002 | Terpene     | CAB39697  | BGC0000663 | Hopene             | 43 | 97.1  | 495 | 1.3E-139 |
| RHG_cluster_003 | Terpene     | NP_199612 | BGC0000670 | Thalianol          | 32 | 58.9  | 329 | 1.2E-89  |
| RHG_cluster_006 | Terpene     | -         | -          | -                  | -  | -     | -   | -        |
| RHG_cluster_013 | Terpene     | -         | -          | -                  | -  | -     | -   | -        |
| RHG_cluster_015 | Terpene     | CAB39697  | BGC0000663 | Hopene             | 42 | 90.3  | 520 | 2.3E-147 |

|                 |         |                     |            |                |    |      |     |          |
|-----------------|---------|---------------------|------------|----------------|----|------|-----|----------|
| RHG_cluster_026 | Terpene | -                   | -          | -              | -  | -    | -   | -        |
| RHG_cluster_036 | Terpene | BAG16278            | BGC0000632 | Brasiliardin_A | 33 | 32.9 | 76  | 1.6E-13  |
| RHG_cluster_041 | Terpene | chr3.CM0292.40.r2.m | BGC0001317 | Lupeol         | 34 | 56.6 | 378 | 3.9E-104 |
| RHG_cluster_042 | Terpene | -                   | -          | -              | -  | -    | -   | -        |
| RHG_cluster_043 | Terpene | NP_199612           | BGC0000670 | Thalianol      | 32 | 59.0 | 319 | 1.2E-86  |
| RHG_cluster_047 | Terpene | -                   | -          | -              | -  | -    | -   | -        |
| RHG_cluster_050 | Terpene | NP_199612           | BGC0000670 | Thalianol      | 32 | 59.3 | 310 | 7.5E-84  |
| RHG_cluster_052 | Terpene | -                   | -          | -              | -  | -    | -   | -        |
| RHG_cluster_055 | Terpene | AED94049            | BGC0001314 | Tirucalla      | 30 | 58.6 | 336 | 1.7E-91  |
| RHG_cluster_058 | Terpene | AED94049            | BGC0001314 | Tirucalla      | 31 | 57.7 | 341 | 3.1E-93  |
| RHG_cluster_060 | Terpene | NP_199612           | BGC0000670 | Thalianol      | 31 | 56.9 | 125 | 2.0E-28  |
| RHG_cluster_063 | Terpene | -                   | -          | -              | -  | -    | -   | -        |
| RHG_cluster_071 | Terpene | -                   | -          | -              | -  | -    | -   | -        |
| RHG_cluster_101 | Terpene | -                   | -          | -              | -  | -    | -   | -        |
| RHG_cluster_102 | Terpene | chr3.CM0292.40.r2.m | BGC0001317 | Lupeol         | 35 | 59.3 | 395 | 1.8E-109 |
| RHG_cluster_104 | Terpene | CAB39692            | BGC0000663 | Hopene         | 39 | 36.4 | 168 | 2.9E-41  |
| RHG_cluster_105 | Terpene | -                   | -          | -              | -  | -    | -   | -        |
| RHG_cluster_106 | Terpene | -                   | -          | -              | -  | -    | -   | -        |
| RHG_cluster_107 | Terpene | -                   | -          | -              | -  | -    | -   | -        |
| RHG_cluster_113 | Terpene | AGS67377            | BGC0001227 | Isorenieratene | 35 | 29.7 | 50  | 5.6E-06  |
| RHG_cluster_118 | Terpene | -                   | -          | -              | -  | -    | -   | -        |
| RHG_cluster_123 | Terpene | NP_199612           | BGC0000670 | Thalianol      | 32 | 60.4 | 321 | 5.5E-87  |
| RHG_cluster_137 | Terpene | CAB39697            | BGC0000663 | Hopene         | 59 | 96.6 | 748 | 4.7E-216 |
| RHG_cluster_146 | Terpene | chr3.CM0292.40.r2.m | BGC0001317 | Lupeol         | 34 | 98.5 | 378 | 1.7E-104 |
| RHG_cluster_152 | Terpene | CAB39697            | BGC0000663 | Hopene         | 40 | 93.9 | 452 | 9.5E-127 |
| RHG_cluster_157 | Terpene | AED94049            | BGC0001314 | Tirucalla      | 30 | 59.1 | 326 | 1.0E-88  |
| RHG_cluster_158 | Terpene | -                   | -          | -              | -  | -    | -   | -        |
| RHG_cluster_169 | Terpene | NP_199612           | BGC0000670 | Thalianol      | 31 | 58.5 | 306 | 1.1E-82  |
| RHG_cluster_170 | Terpene | ABP55685            | BGC0001087 | Sioxanthin     | 44 | 99.4 | 244 | 1.6E-64  |
| RHG_cluster_180 | Terpene | -                   | -          | -              | -  | -    | -   | -        |
| RHG_cluster_199 | Terpene | -                   | -          | -              | -  | -    | -   | -        |
| RHG_cluster_200 | Terpene | -                   | -          | -              | -  | -    | -   | -        |

|                 |             |                     |            |                   |    |      |      |          |
|-----------------|-------------|---------------------|------------|-------------------|----|------|------|----------|
| RHG_cluster_201 | Terpene     | AMY15074            | BGC0001339 | Squalestatin_S1   | 26 | 83.1 | 90   | 5.0E-18  |
| RHG_cluster_207 | Terpene     | -                   | -          | -                 | -  | -    | -    | -        |
| RHG_cluster_219 | Terpene     | -                   | -          | -                 | -  | -    | -    | -        |
| RHG_cluster_224 | Terpene     | chr3.CM0292.40.r2.m | BGC0001317 | Lupeol            | 34 | 58.2 | 362  | 1.7E-99  |
| RHG_cluster_234 | Terpene     | CAB39697            | BGC0000663 | Hopene            | 39 | 93.9 | 447  | 2.3E-125 |
| RHG_cluster_243 | Terpene     | ABP55685            | BGC0001087 | Sioxanthin        | 42 | 99.7 | 237  | 3.3E-62  |
| RHG_cluster_247 | Terpene     | chr3.CM0292.40.r2.m | BGC0001317 | Lupeol            | 34 | 63.0 | 378  | 2.7E-104 |
| RHG_cluster_252 | Terpene     | AEE83589            | BGC0001313 | Arabidiol/Baruol. | 24 | 37.9 | 56   | 1.5E-07  |
| RHG_cluster_256 | Terpene     | CAB39697            | BGC0000663 | Hopene            | 55 | 98.9 | 727  | 1.2E-209 |
| RHG_cluster_276 | Terpene     | CAB39697            | BGC0000663 | Hopene            | 44 | 92.8 | 493  | 3.6E-139 |
| RHG_cluster_280 | Terpene     | CAB39697            | BGC0000663 | Hopene            | 49 | 97.9 | 623  | 3.8E-178 |
| RHG_cluster_284 | Terpene     | CAB39697            | BGC0000663 | Hopene            | 40 | 93.8 | 487  | 2.7E-137 |
| RHG_cluster_299 | Terpene     | CAB39697            | BGC0000663 | Hopene            | 46 | 99.0 | 475  | 1.1E-133 |
| RHG_cluster_304 | Terpene     | CAB39697            | BGC0000663 | Hopene            | 42 | 98.9 | 487  | 3.4E-137 |
| RHG_cluster_309 | Terpene     | CAB39697            | BGC0000663 | Hopene            | 48 | 96.9 | 614  | 1.1E-175 |
| RHG_cluster_311 | Terpene     | NP_199612           | BGC0000670 | Thalianol         | 32 | 99.8 | 272  | 1.1E-72  |
| RHG_cluster_314 | Terpene     | CAB39697            | BGC0000663 | Hopene            | 51 | 97.5 | 408  | 9.3E-114 |
| RHG_cluster_320 | Terpene     | -                   | -          | -                 | -  | -    | -    | -        |
| RHG_cluster_323 | Terpene     | -                   | -          | -                 | -  | -    | -    | -        |
| RHG_cluster_327 | Terpene     | CAB39697            | BGC0000663 | Hopene            | 42 | 99.3 | 330  | 3.5E-90  |
| RHG_cluster_330 | Terpene     | CAB39697            | BGC0000663 | Hopene            | 51 | 96.3 | 440  | 2.0E-123 |
| RHG_cluster_331 | Terpene     | CAB39697            | BGC0000663 | Hopene            | 60 | 99.5 | 740  | 1.6E-213 |
| RHG_cluster_337 | Terpene     | -                   | -          | -                 | -  | -    | -    | -        |
| RHG_cluster_350 | Terpene     | -                   | -          | -                 | -  | -    | -    | -        |
| RHG_cluster_353 | Terpene     | NP_199612           | BGC0000670 | Thalianol         | 32 | 86.6 | 203  | 5.4E-52  |
| RHG_cluster_363 | Terpene     | -                   | -          | -                 | -  | -    | -    | -        |
| RHG_cluster_364 | Terpene     | CAB39697            | BGC0000663 | Hopene            | 44 | 96.4 | 322  | 8.6E-88  |
| RHG_cluster_366 | Terpene     | -                   | -          | -                 | -  | -    | -    | -        |
| RHG_cluster_369 | Terpene     | CAA79957            | BGC0000648 | Carotenoid        | 34 | 91.3 | 156  | 5.5E-38  |
| RHG_cluster_014 | TransAT-PKS | AAF62883            | BGC0000991 | Epothilone        | 39 | 91.6 | 847  | 2.4E-245 |
| RHG_cluster_161 | TransAT-PKS | AAF26921            | BGC0000988 | Epothilone        | 39 | 91.1 | 830  | 3.9E-240 |
| RHG_cluster_008 | Type I PKS  | AIW82279            | BGC0001125 | Puwainaphycins    | 37 | 75.4 | 1442 | 0.0E+00  |

|                 |            |          |            |                    |    |       |      |          |
|-----------------|------------|----------|------------|--------------------|----|-------|------|----------|
| RHG_cluster_011 | Type I PKS | AGC45622 | BGC0001394 | Phenalamide        | 36 | 44.7  | 513  | 1.2E-144 |
| RHG_cluster_016 | Type I PKS | BAG17643 | BGC0001043 | SGR_PTMs           | 35 | 45.9  | 515  | 2.4E-145 |
| RHG_cluster_017 | Type I PKS | AHB82052 | BGC0001019 | Microsclerodermins | 33 | 100.2 | 200  | 3.5E-51  |
| RHG_cluster_019 | Type I PKS | AIW82279 | BGC0001125 | Puwainaphycins     | 39 | 35.7  | 1516 | 0.0E+00  |
| RHG_cluster_027 | Type I PKS | AIW82279 | BGC0001125 | Puwainaphycins     | 38 | 77.9  | 1467 | 0.0E+00  |
| RHG_cluster_028 | Type I PKS | BAG17643 | BGC0001043 | SGR_PTMs           | 35 | 47.0  | 522  | 3.4E-147 |
| RHG_cluster_034 | Type I PKS | AGC45622 | BGC0001394 | Phenalamide        | 31 | 49.5  | 481  | 6.6E-135 |
| RHG_cluster_037 | Type I PKS | AIW82279 | BGC0001125 | Puwainaphycins     | 37 | 75.6  | 1485 | 0.0E+00  |
| RHG_cluster_040 | Type I PKS | AAS98781 | BGC0001001 | Jamaicamide        | 35 | 82.8  | 1423 | 0.0E+00  |
| RHG_cluster_053 | Type I PKS | AHA38199 | BGC0000069 | Gephyronic_acid    | 36 | 98.8  | 1285 | 0.0E+00  |
| RHG_cluster_054 | Type I PKS | AIW82279 | BGC0001125 | Puwainaphycins     | 37 | 81.6  | 1499 | 0.0E+00  |
| RHG_cluster_056 | Type I PKS | AIW82279 | BGC0001125 | Puwainaphycins     | 38 | 76.1  | 1505 | 0.0E+00  |
| RHG_cluster_057 | Type I PKS | AIW82279 | BGC0001125 | Puwainaphycins     | 37 | 76.7  | 1513 | 0.0E+00  |
| RHG_cluster_062 | Type I PKS | ACB46195 | BGC0000989 | Epothilone         | 40 | 76.3  | 906  | 5.5E-263 |
| RHG_cluster_067 | Type I PKS | BAG17643 | BGC0001043 | SGR_PTMs           | 35 | 49.1  | 542  | 3.2E-153 |
| RHG_cluster_069 | Type I PKS | AIW82279 | BGC0001125 | Puwainaphycins     | 37 | 75.9  | 1494 | 0.0E+00  |
| RHG_cluster_072 | Type I PKS | BAG17643 | BGC0001043 | SGR_PTMs           | 34 | 47.2  | 511  | 4.6E-144 |
| RHG_cluster_087 | Type I PKS | AIW82279 | BGC0001125 | Puwainaphycins     | 37 | 81.0  | 1453 | 0.0E+00  |
| RHG_cluster_090 | Type I PKS | AIW82279 | BGC0001125 | Puwainaphycins     | 37 | 76.5  | 1517 | 0.0E+00  |
| RHG_cluster_091 | Type I PKS | BAG17643 | BGC0001043 | SGR_PTMs           | 34 | 49.4  | 514  | 5.4E-145 |
| RHG_cluster_094 | Type I PKS | AGC45621 | BGC0001394 | Phenalamide        | 42 | 78.0  | 850  | 3.5E-246 |
| RHG_cluster_096 | Type I PKS | BAG17643 | BGC0001043 | SGR_PTMs           | 33 | 49.7  | 525  | 3.1E-148 |
| RHG_cluster_100 | Type I PKS | AIW82279 | BGC0001125 | Puwainaphycins     | 37 | 76.6  | 1506 | 0.0E+00  |
| RHG_cluster_109 | Type I PKS | BAG17643 | BGC0001043 | SGR_PTMs           | 33 | 67.9  | 544  | 6.5E-154 |
| RHG_cluster_119 | Type I PKS | AIW82279 | BGC0001125 | Puwainaphycins     | 39 | 26.6  | 1460 | 0.0E+00  |
| RHG_cluster_124 | Type I PKS | AIW82279 | BGC0001125 | Puwainaphycins     | 37 | 81.8  | 1483 | 0.0E+00  |
| RHG_cluster_128 | Type I PKS | BAG17643 | BGC0001043 | SGR_PTMs           | 34 | 48.5  | 526  | 1.8E-148 |
| RHG_cluster_135 | Type I PKS | BAG17643 | BGC0001043 | SGR_PTMs           | 35 | 47.3  | 541  | 5.4E-153 |
| RHG_cluster_136 | Type I PKS | CAQ43075 | BGC0000970 | Chondrochloren     | 32 | 49.5  | 514  | 7.0E-145 |
| RHG_cluster_140 | Type I PKS | AAK73514 | BGC0000015 | Amphotericin       | 36 | 51.8  | 1819 | 0.0E+00  |
| RHG_cluster_145 | Type I PKS | AAF26921 | BGC0000988 | Epothilone         | 36 | 74.8  | 925  | 1.5E-268 |
| RHG_cluster_147 | Type I PKS | AIW82279 | BGC0001125 | Puwainaphycins     | 37 | 75.2  | 1501 | 0.0E+00  |

|                 |            |          |            |                               |    |       |      |          |
|-----------------|------------|----------|------------|-------------------------------|----|-------|------|----------|
| RHG_cluster_149 | Type I PKS | AIW82279 | BGC0001125 | Puwainaphycins                | 37 | 75.9  | 1139 | 0.0E+00  |
| RHG_cluster_154 | Type I PKS | AIW82279 | BGC0001125 | Puwainaphycins                | 36 | 76.0  | 1485 | 0.0E+00  |
| RHG_cluster_159 | Type I PKS | AIW82279 | BGC0001125 | Puwainaphycins                | 38 | 56.6  | 1531 | 0.0E+00  |
| RHG_cluster_160 | Type I PKS | AIW82279 | BGC0001125 | Puwainaphycins                | 37 | 97.1  | 1484 | 0.0E+00  |
| RHG_cluster_162 | Type I PKS | AIW82279 | BGC0001125 | Puwainaphycins                | 37 | 75.4  | 1512 | 0.0E+00  |
| RHG_cluster_163 | Type I PKS | CAQ18828 | BGC0000954 | Ajudazol                      | 42 | 89.5  | 830  | 3.5E-240 |
| RHG_cluster_164 | Type I PKS | AIW82279 | BGC0001125 | Puwainaphycins                | 38 | 76.0  | 1427 | 0.0E+00  |
| RHG_cluster_165 | Type I PKS | AIW82279 | BGC0001125 | Puwainaphycins                | 38 | 77.0  | 1512 | 0.0E+00  |
| RHG_cluster_167 | Type I PKS | AAT70105 | BGC0001165 | Curacin                       | 36 | 102.2 | 978  | 7.2E-285 |
| RHG_cluster_168 | Type I PKS | AHB82063 | BGC0001231 | Microsclerodermins            | 40 | 103.0 | 441  | 1.7E-123 |
| RHG_cluster_174 | Type I PKS | AAU04878 | BGC0000365 | Glycopeptidolipid             | 40 | 95.1  | 827  | 2.3E-239 |
| RHG_cluster_177 | Type I PKS | AIW82279 | BGC0001125 | Puwainaphycins                | 38 | 74.7  | 1512 | 0.0E+00  |
| RHG_cluster_179 | Type I PKS | AIW82279 | BGC0001125 | Puwainaphycins                | 37 | 75.7  | 1444 | 0.0E+00  |
| RHG_cluster_183 | Type I PKS | CAQ18832 | BGC0000954 | Ajudazol                      | 34 | 39.5  | 383  | 1.7E-105 |
| RHG_cluster_191 | Type I PKS | CAQ18834 | BGC0000954 | Ajudazol                      | 46 | 103.3 | 1096 | 0.0E+00  |
| RHG_cluster_192 | Type I PKS | AIW82279 | BGC0001125 | Puwainaphycins                | 37 | 100.0 | 967  | 2.8E-281 |
| RHG_cluster_193 | Type I PKS | AIW82279 | BGC0001125 | Puwainaphycins                | 38 | 65.2  | 1512 | 0.0E+00  |
| RHG_cluster_194 | Type I PKS | AIW82279 | BGC0001125 | Puwainaphycins                | 37 | 86.9  | 1460 | 0.0E+00  |
| RHG_cluster_195 | Type I PKS | AIW82279 | BGC0001125 | Puwainaphycins                | 37 | 93.9  | 1469 | 0.0E+00  |
| RHG_cluster_197 | Type I PKS | AAF62883 | BGC0000991 | Epothilone                    | 38 | 83.7  | 924  | 1.9E-268 |
| RHG_cluster_198 | Type I PKS | AIW82279 | BGC0001125 | Puwainaphycins                | 36 | 76.8  | 1101 | 0.0E+00  |
| RHG_cluster_202 | Type I PKS | BAG17643 | BGC0001043 | SGR_PTMs                      | 34 | 51.8  | 540  | 1.2E-152 |
| RHG_cluster_203 | Type I PKS | AIW82279 | BGC0001125 | Puwainaphycins                | 37 | 63.1  | 1323 | 0.0E+00  |
| RHG_cluster_204 | Type I PKS | AIW82279 | BGC0001125 | Puwainaphycins                | 37 | 101.0 | 1477 | 0.0E+00  |
| RHG_cluster_206 | Type I PKS | BAG17643 | BGC0001043 | SGR_PTMs                      | 35 | 68.8  | 533  | 1.0E-150 |
| RHG_cluster_208 | Type I PKS | CAQ18829 | BGC0000954 | Ajudazol                      | 44 | 91.2  | 747  | 2.0E-215 |
| RHG_cluster_209 | Type I PKS | BAG17643 | BGC0001043 | SGR_PTMs                      | 35 | 48.8  | 555  | 2.8E-157 |
| RHG_cluster_213 | Type I PKS | ABL86391 | BGC0000999 | Heat-stable_antifungal_factor | 33 | 51.3  | 534  | 5.1E-151 |
| RHG_cluster_215 | Type I PKS | CAQ18828 | BGC0000954 | Ajudazol                      | 48 | 101.0 | 587  | 2.0E-167 |
| RHG_cluster_217 | Type I PKS | AIW82279 | BGC0001125 | Puwainaphycins                | 36 | 100.9 | 961  | 9.7E-280 |
| RHG_cluster_221 | Type I PKS | AAU04878 | BGC0000365 | Glycopeptidolipid             | 44 | 85.7  | 356  | 6.6E-98  |
| RHG_cluster_226 | Type I PKS | AAF62883 | BGC0000991 | Epothilone                    | 40 | 95.3  | 819  | 5.0E-237 |

|                 |            |          |            |                    |    |       |      |          |
|-----------------|------------|----------|------------|--------------------|----|-------|------|----------|
| RHG_cluster_229 | Type I PKS | BAK64637 | BGC0000135 | Reveromycin        | 38 | 96.0  | 875  | 9.3E-254 |
| RHG_cluster_233 | Type I PKS | AAU04878 | BGC0000365 | Glycopeptidolipid  | 38 | 93.5  | 1352 | 0.0E+00  |
| RHG_cluster_237 | Type I PKS | AAU04878 | BGC0000365 | Glycopeptidolipid  | 42 | 87.1  | 484  | 2.8E-136 |
| RHG_cluster_238 | Type I PKS | CAQ18828 | BGC0000954 | Ajudazol           | 47 | 97.6  | 568  | 1.3E-161 |
| RHG_cluster_240 | Type I PKS | AIW82279 | BGC0001125 | Puwainaphycins     | 36 | 82.3  | 1162 | 0.0E+00  |
| RHG_cluster_242 | Type I PKS | CAQ18828 | BGC0000954 | Ajudazol           | 47 | 97.3  | 564  | 1.8E-160 |
| RHG_cluster_246 | Type I PKS | AIW82279 | BGC0001125 | Puwainaphycins     | 36 | 77.7  | 964  | 2.6E-280 |
| RHG_cluster_248 | Type I PKS | AEU11005 | BGC0001029 | Nostophycin        | 37 | 88.8  | 765  | 8.2E-221 |
| RHG_cluster_249 | Type I PKS | AAU04878 | BGC0000365 | Glycopeptidolipid  | 46 | 99.8  | 669  | 6.2E-192 |
| RHG_cluster_255 | Type I PKS | CAQ18834 | BGC0000954 | Ajudazol           | 43 | 79.5  | 344  | 2.6E-94  |
| RHG_cluster_258 | Type I PKS | AIW82279 | BGC0001125 | Puwainaphycins     | 37 | 102.4 | 1105 | 0.0E+00  |
| RHG_cluster_261 | Type I PKS | AAU04878 | BGC0000365 | Glycopeptidolipid  | 40 | 85.2  | 530  | 5.1E-150 |
| RHG_cluster_262 | Type I PKS | CAQ18829 | BGC0000954 | Ajudazol           | 43 | 90.5  | 689  | 6.1E-198 |
| RHG_cluster_266 | Type I PKS | AAT70105 | BGC0001165 | Curacin            | 36 | 99.8  | 950  | 3.7E-276 |
| RHG_cluster_268 | Type I PKS | AAF62883 | BGC0000991 | Epothilone         | 40 | 86.3  | 933  | 4.8E-271 |
| RHG_cluster_269 | Type I PKS | CBD77732 | BGC0000974 | Crocacin           | 36 | 102.0 | 475  | 1.8E-133 |
| RHG_cluster_272 | Type I PKS | CBD77732 | BGC0000974 | Crocacin           | 37 | 99.1  | 376  | 6.3E-104 |
| RHG_cluster_279 | Type I PKS | AHB82063 | BGC0001231 | Microsclerodermins | 42 | 98.3  | 452  | 7.7E-127 |
| RHG_cluster_282 | Type I PKS | CAQ18834 | BGC0000954 | Ajudazol           | 43 | 76.7  | 282  | 1.3E-75  |
| RHG_cluster_283 | Type I PKS | BAG17643 | BGC0001043 | SGR_PTM            | 35 | 60.0  | 423  | 1.1E-117 |
| RHG_cluster_285 | Type I PKS | CAQ18828 | BGC0000954 | Ajudazol           | 42 | 88.4  | 808  | 1.1E-233 |
| RHG_cluster_288 | Type I PKS | CAQ18828 | BGC0000954 | Ajudazol           | 42 | 98.4  | 799  | 7.8E-231 |
| RHG_cluster_289 | Type I PKS | AAF62883 | BGC0000991 | Epothilone         | 41 | 88.5  | 737  | 3.9E-212 |
| RHG_cluster_294 | Type I PKS | AGC45620 | BGC0001394 | Phenalamide        | 47 | 80.6  | 520  | 3.3E-147 |
| RHG_cluster_295 | Type I PKS | CAQ18828 | BGC0000954 | Ajudazol           | 40 | 95.5  | 755  | 1.2E-217 |
| RHG_cluster_296 | Type I PKS | CAQ18829 | BGC0000954 | Ajudazol           | 45 | 86.5  | 547  | 3.6E-155 |
| RHG_cluster_298 | Type I PKS | AAU04878 | BGC0000365 | Glycopeptidolipid  | 43 | 99.6  | 731  | 1.3E-210 |
| RHG_cluster_302 | Type I PKS | BAG17643 | BGC0001043 | SGR_PTM            | 38 | 102.2 | 488  | 2.0E-137 |
| RHG_cluster_306 | Type I PKS | AAU04878 | BGC0000365 | Glycopeptidolipid  | 46 | 98.9  | 825  | 6.6E-239 |
| RHG_cluster_308 | Type I PKS | ABX60162 | BGC0000978 | Cylindrospermopsin | 47 | 85.0  | 423  | 5.4E-118 |
| RHG_cluster_316 | Type I PKS | CAQ18829 | BGC0000954 | Ajudazol           | 44 | 83.8  | 508  | 1.0E-143 |
| RHG_cluster_318 | Type I PKS | CAQ18828 | BGC0000954 | Ajudazol           | 45 | 75.8  | 373  | 7.1E-103 |

|                 |              |          |            |                   |    |       |     |          |
|-----------------|--------------|----------|------------|-------------------|----|-------|-----|----------|
| RHG_cluster_322 | Type I PKS   | CAQ18828 | BGC0000954 | Ajudazol          | 46 | 96.2  | 679 | 6.4E-195 |
| RHG_cluster_326 | Type I PKS   | AGC45620 | BGC0001394 | Phenalamide       | 45 | 85.9  | 559 | 7.1E-159 |
| RHG_cluster_335 | Type I PKS   | CAQ18829 | BGC0000954 | Ajudazol          | 47 | 98.0  | 542 | 1.0E-153 |
| RHG_cluster_336 | Type I PKS   | AAU04878 | BGC0000365 | Glycopeptidolipid | 45 | 85.2  | 449 | 8.7E-126 |
| RHG_cluster_338 | Type I PKS   | AAU04878 | BGC0000365 | Glycopeptidolipid | 45 | 101.0 | 534 | 1.5E-151 |
| RHG_cluster_340 | Type I PKS   | CBD77732 | BGC0000974 | Crocacin          | 40 | 96.3  | 429 | 6.6E-120 |
| RHG_cluster_341 | Type I PKS   | CBD77732 | BGC0000974 | Crocacin          | 38 | 101.0 | 404 | 3.0E-112 |
| RHG_cluster_342 | Type I PKS   | AAU04878 | BGC0000365 | Glycopeptidolipid | 49 | 96.9  | 525 | 8.4E-149 |
| RHG_cluster_345 | Type I PKS   | AAU04878 | BGC0000365 | Glycopeptidolipid | 48 | 82.7  | 423 | 5.8E-118 |
| RHG_cluster_351 | Type I PKS   | CAQ18834 | BGC0000954 | Ajudazol          | 45 | 101.1 | 398 | 1.7E-110 |
| RHG_cluster_354 | Type I PKS   | AIT55264 | BGC0000072 | Gulmirecin        | 41 | 99.8  | 334 | 1.7E-91  |
| RHG_cluster_356 | Type I PKS   | AAU04878 | BGC0000365 | Glycopeptidolipid | 48 | 101.9 | 398 | 1.5E-110 |
| RHG_cluster_357 | Type I PKS   | AAU04878 | BGC0000365 | Glycopeptidolipid | 48 | 102.1 | 382 | 6.6E-106 |
| RHG_cluster_362 | Type I PKS   | BAG17643 | BGC0001043 | SGR_PTMs          | 39 | 103.7 | 232 | 1.2E-60  |
| RHG_cluster_367 | Type I PKS   | CAQ18834 | BGC0000954 | Ajudazol          | 39 | 102.7 | 217 | 2.8E-56  |
| RHG_cluster_080 | Type II PKS  | AAC18108 | BGC0000225 | Frenolicin        | 27 | 107.1 | 97  | 4.5E-20  |
| RHG_cluster_076 | Type III PKS | BAG17301 | BGC0000282 | Alkylresorcinol   | 40 | 99.7  | 226 | 5.7E-59  |
| RHG_cluster_117 | Type III PKS | BAG17301 | BGC0000282 | Alkylresorcinol   | 40 | 97.5  | 222 | 1.1E-57  |
| RHG_cluster_129 | Type III PKS | BAG17301 | BGC0000282 | Alkylresorcinol   | 37 | 99.7  | 211 | 1.9E-54  |
| RHG_cluster_267 | Type III PKS | BAG17301 | BGC0000282 | Alkylresorcinol   | 40 | 97.5  | 224 | 1.7E-58  |
| RHG_cluster_307 | Type III PKS | BAG17301 | BGC0000282 | Alkylresorcinol   | 43 | 100.0 | 249 | 6.3E-66  |
| RHG_cluster_358 | Type III PKS | BAG17301 | BGC0000282 | Alkylresorcinol   | 40 | 97.5  | 235 | 1.3E-61  |

Table S16. BLAST search of the BGCs identified from the metagenome of *Spheciospongia* sp. against the MiBIG database

| BGC ID          | Predicted BGC type | MiBIG Protein | MiBIG Cluster | MiBIG Product         | Identity (%) | Coverage (%) | BLAST Score | E-value  |
|-----------------|--------------------|---------------|---------------|-----------------------|--------------|--------------|-------------|----------|
| SPV_cluster_094 | Arylpolyene        | AAO39098      | BGC0000956    | Andrimid              | 34           | 63.7         | 314         | 5.0E-85  |
| SPV_cluster_112 | Arylpolyene        | ADI58650      | BGC0000187    | Asukamycin            | 40           | 91.0         | 214         | 2.8E-55  |
| SPV_cluster_123 | Arylpolyene        | ANY57968      | BGC0001369    | Metatricycloene       | 34           | 91.9         | 321         | 3.1E-87  |
| SPV_cluster_136 | Arylpolyene        | AAW85352      | BGC0000837    | APE_Vf                | 46           | 82.9         | 283         | 3.5E-76  |
| SPV_cluster_137 | Arylpolyene        | AAW85352      | BGC0000837    | APE_Vf                | 38           | 97.8         | 238         | 1.7E-62  |
| SPV_cluster_138 | Arylpolyene        | AAW85355      | BGC0000837    | APE_Vf                | 56           | 99.3         | 465         | 8.5E-131 |
| SPV_cluster_312 | Arylpolyene        | AHA12083      | BGC0001172    | Chlorizidine_A        | 35           | 99.5         | 176         | 6.4E-44  |
| SPV_cluster_345 | Arylpolyene        | ABQ04139      | BGC0000838    | Flexirubin            | 28           | 68.5         | 67          | 5.0E-11  |
| SPV_cluster_376 | Arylpolyene        | CUI25675      | BGC0001353    | Thiolactomycin        | 38           | 88.2         | 191         | 2.3E-48  |
| SPV_cluster_021 | Bacteriocin        | -             | -             | -                     | -            | -            | -           | -        |
| SPV_cluster_064 | Bacteriocin        | BAP82649      | BGC0001148    | Pheganomycin          | 38           | 98.8         | 432         | 9.7E-121 |
| SPV_cluster_135 | Bacteriocin        | ZP_00672901   | BGC0000481    | Trichamide            | 39           | 102.8        | 514         | 1.7E-145 |
| SPV_cluster_139 | Bacteriocin        | BAE46919      | BGC0000565    | Goadsporin            | 41           | 97.9         | 534         | 2.8E-151 |
| SPV_cluster_176 | Bacteriocin        | -             | -             | -                     | -            | -            | -           | -        |
| SPV_cluster_198 | Bacteriocin        | -             | -             | -                     | -            | -            | -           | -        |
| SPV_cluster_199 | Bacteriocin        | CAO82084      | BGC0000473    | Microcyclamide        | 42           | 100.8        | 537         | 3.3E-152 |
| SPV_cluster_297 | Bacteriocin        | ACA04490      | BGC0000477    | Patellin_2/patellin_3 | 42           | 103.8        | 555         | 8.9E-158 |
| SPV_cluster_346 | Bacteriocin        | ACA04483      | BGC0000480    | Tenucyclamide_A/C     | 39           | 100.5        | 388         | 2.0E-107 |
| SPV_cluster_350 | Bacteriocin        | CAO82084      | BGC0000473    | Microcyclamide        | 41           | 102.0        | 516         | 5.9E-146 |
| SPV_cluster_355 | Bacteriocin        | WP_006126653  | BGC0000554    | SRO15-3108            | 36           | 71.5         | 411         | 2.1E-114 |
| SPV_cluster_398 | Bacteriocin        | CAA09633      | BGC0000227    | Granaticin            | 32           | 91.8         | 115         | 1.1E-25  |
| SPV_cluster_424 | Bacteriocin        | ACA04483      | BGC0000480    | Tenucyclamide_A/C     | 38           | 102.9        | 347         | 3.5E-95  |
| SPV_cluster_431 | Bacteriocin        | CAO82084      | BGC0000473    | Microcyclamide        | 38           | 101.5        | 210         | 3.8E-54  |
| SPV_cluster_002 | Cf_fatty_acid      | ALV82456      | BGC0001382    | Svaricin              | 48           | 98.3         | 385         | 6.7E-107 |
| SPV_cluster_003 | Cf_fatty_acid      | ALV82456      | BGC0001382    | Svaricin              | 48           | 100.2        | 367         | 2.5E-101 |
| SPV_cluster_007 | Cf_fatty_acid      | ALV82456      | BGC0001382    | Svaricin              | 48           | 97.4         | 368         | 1.1E-101 |
| SPV_cluster_009 | Cf_fatty_acid      | ALV82456      | BGC0001382    | Svaricin              | 48           | 99.3         | 367         | 1.9E-101 |
| SPV_cluster_014 | Cf_fatty_acid      | ALV82456      | BGC0001382    | Svaricin              | 50           | 99.3         | 366         | 4.2E-101 |
| SPV_cluster_015 | Cf_fatty_acid      | ALV82456      | BGC0001382    | Svaricin              | 47           | 98.5         | 362         | 7.9E-100 |



|                 |               |          |            |                    |    |       |     |          |
|-----------------|---------------|----------|------------|--------------------|----|-------|-----|----------|
| SPV_cluster_016 | Cf_fatty_acid | -        | -          | -                  | -  | -     | -   | -        |
| SPV_cluster_024 | Cf_fatty_acid | ALV82456 | BGC0001382 | Svaricin           | 50 | 98.1  | 387 | 1.8E-107 |
| SPV_cluster_025 | Cf_fatty_acid | ALV82456 | BGC0001382 | Svaricin           | 47 | 98.3  | 367 | 2.5E-101 |
| SPV_cluster_026 | Cf_fatty_acid | CAA16179 | BGC0001063 | Undecylprodigiosin | 46 | 94.8  | 269 | 5.9E-72  |
| SPV_cluster_027 | Cf_fatty_acid | ALV82456 | BGC0001382 | Svaricin           | 50 | 98.3  | 399 | 4.6E-111 |
| SPV_cluster_028 | Cf_fatty_acid | CAA16179 | BGC0001063 | Undecylprodigiosin | 43 | 94.3  | 241 | 1.3E-63  |
| SPV_cluster_031 | Cf_fatty_acid | CAA16177 | BGC0001063 | Undecylprodigiosin | 49 | 97.4  | 365 | 9.4E-101 |
| SPV_cluster_032 | Cf_fatty_acid | ALV82456 | BGC0001382 | Svaricin           | 46 | 98.1  | 365 | 7.2E-101 |
| SPV_cluster_033 | Cf_fatty_acid | ALV82456 | BGC0001382 | Svaricin           | 46 | 99.0  | 359 | 6.7E-99  |
| SPV_cluster_034 | Cf_fatty_acid | CAA16179 | BGC0001063 | Undecylprodigiosin | 35 | 84.4  | 161 | 1.4E-39  |
| SPV_cluster_036 | Cf_fatty_acid | AHF22848 | BGC0000091 | Marineosin         | 40 | 101.9 | 267 | 2.6E-71  |
| SPV_cluster_037 | Cf_fatty_acid | ALV82456 | BGC0001382 | Svaricin           | 46 | 98.8  | 349 | 5.3E-96  |
| SPV_cluster_038 | Cf_fatty_acid | CAA16179 | BGC0001063 | Undecylprodigiosin | 44 | 94.2  | 258 | 1.3E-68  |
| SPV_cluster_039 | Cf_fatty_acid | ALV82456 | BGC0001382 | Svaricin           | 47 | 98.3  | 373 | 3.4E-103 |
| SPV_cluster_042 | Cf_fatty_acid | ALV82456 | BGC0001382 | Svaricin           | 47 | 97.7  | 360 | 2.4E-99  |
| SPV_cluster_043 | Cf_fatty_acid | ALV82456 | BGC0001382 | Svaricin           | 38 | 101.2 | 284 | 2.7E-76  |
| SPV_cluster_045 | Cf_fatty_acid | ALV82456 | BGC0001382 | Svaricin           | 44 | 96.2  | 339 | 5.6E-93  |
| SPV_cluster_046 | Cf_fatty_acid | CAA16179 | BGC0001063 | Undecylprodigiosin | 42 | 85.9  | 248 | 1.6E-65  |
| SPV_cluster_053 | Cf_fatty_acid | ALV82456 | BGC0001382 | Svaricin           | 43 | 98.6  | 312 | 7.3E-85  |
| SPV_cluster_054 | Cf_fatty_acid | ALV82456 | BGC0001382 | Svaricin           | 46 | 100.0 | 366 | 4.2E-101 |
| SPV_cluster_060 | Cf_fatty_acid | ALV82456 | BGC0001382 | Svaricin           | 45 | 99.3  | 356 | 5.6E-98  |
| SPV_cluster_066 | Cf_fatty_acid | ALV82456 | BGC0001382 | Svaricin           | 45 | 99.0  | 344 | 1.3E-94  |
| SPV_cluster_069 | Cf_fatty_acid | ALV82456 | BGC0001382 | Svaricin           | 47 | 98.5  | 358 | 1.5E-98  |
| SPV_cluster_073 | Cf_fatty_acid | CAA16179 | BGC0001063 | Undecylprodigiosin | 44 | 88.4  | 245 | 7.4E-65  |
| SPV_cluster_074 | Cf_fatty_acid | ALV82456 | BGC0001382 | Svaricin           | 48 | 99.1  | 364 | 1.2E-100 |
| SPV_cluster_076 | Cf_fatty_acid | ALV82456 | BGC0001382 | Svaricin           | 48 | 99.3  | 382 | 5.6E-106 |
| SPV_cluster_081 | Cf_fatty_acid | AHA12083 | BGC0001172 | Chlorizidine_A     | 46 | 97.1  | 315 | 8.5E-86  |
| SPV_cluster_083 | Cf_fatty_acid | AHA12083 | BGC0001172 | Chlorizidine_A     | 49 | 99.3  | 360 | 2.4E-99  |
| SPV_cluster_085 | Cf_fatty_acid | AHA12083 | BGC0001172 | Chlorizidine_A     | 46 | 97.1  | 310 | 3.6E-84  |
| SPV_cluster_086 | Cf_fatty_acid | AHF22848 | BGC0000091 | Marineosin         | 45 | 103.1 | 303 | 4.1E-82  |
| SPV_cluster_093 | Cf_fatty_acid | AIL50179 | BGC0000213 | Colabomycin        | 27 | 103.6 | 89  | 1.2E-17  |
| SPV_cluster_099 | Cf_fatty_acid | ALV82456 | BGC0001382 | Svaricin           | 47 | 99.8  | 382 | 7.3E-106 |

|                 |               |          |            |                              |    |       |     |          |
|-----------------|---------------|----------|------------|------------------------------|----|-------|-----|----------|
| SPV_cluster_101 | Cf_fatty_acid | ALV82456 | BGC0001382 | Svaricin                     | 49 | 98.6  | 373 | 4.6E-103 |
| SPV_cluster_107 | Cf_fatty_acid | ALV82456 | BGC0001382 | Svaricin                     | 46 | 97.6  | 372 | 6.0E-103 |
| SPV_cluster_109 | Cf_fatty_acid | CAA16179 | BGC0001063 | Undecylprodigiosin           | 46 | 97.0  | 269 | 7.4E-72  |
| SPV_cluster_113 | Cf_fatty_acid | AHF22848 | BGC0000091 | Marineosin                   | 47 | 103.0 | 306 | 4.9E-83  |
| SPV_cluster_119 | Cf_fatty_acid | CAA16179 | BGC0001063 | Undecylprodigiosin           | 42 | 61.5  | 226 | 6.6E-59  |
| SPV_cluster_121 | Cf_fatty_acid | ALV82456 | BGC0001382 | Svaricin                     | 45 | 99.3  | 364 | 1.6E-100 |
| SPV_cluster_122 | Cf_fatty_acid | CAA16179 | BGC0001063 | Undecylprodigiosin           | 40 | 98.2  | 243 | 4.3E-64  |
| SPV_cluster_124 | Cf_fatty_acid | AJO72736 | BGC0001381 | Brasilinolide                | 28 | 46.6  | 62  | 1.4E-09  |
| SPV_cluster_126 | Cf_fatty_acid | AHF22848 | BGC0000091 | Marineosin                   | 36 | 100.5 | 199 | 6.6E-51  |
| SPV_cluster_128 | Cf_fatty_acid | ALV82456 | BGC0001382 | Svaricin                     | 49 | 98.5  | 372 | 7.6E-103 |
| SPV_cluster_129 | Cf_fatty_acid | AHF22848 | BGC0000091 | Marineosin                   | 44 | 105.6 | 289 | 8.0E-78  |
| SPV_cluster_130 | Cf_fatty_acid | CAA16179 | BGC0001063 | Undecylprodigiosin           | 41 | 98.5  | 241 | 1.3E-63  |
| SPV_cluster_133 | Cf_fatty_acid | CAA16179 | BGC0001063 | Undecylprodigiosin           | 47 | 91.9  | 274 | 1.9E-73  |
| SPV_cluster_145 | Cf_fatty_acid | CBJ83012 | BGC0000189 | Xenocyoins                   | 50 | 76.7  | 458 | 1.6E-128 |
| SPV_cluster_148 | Cf_fatty_acid | ALV82456 | BGC0001382 | Svaricin                     | 42 | 100.7 | 285 | 1.2E-76  |
| SPV_cluster_152 | Cf_fatty_acid | CAA16177 | BGC0001063 | Undecylprodigiosin           | 47 | 98.8  | 336 | 3.5E-92  |
| SPV_cluster_155 | Cf_fatty_acid | ABQ04139 | BGC0000838 | Flexirubin                   | 40 | 100.7 | 294 | 2.6E-79  |
| SPV_cluster_159 | Cf_fatty_acid | ALV82456 | BGC0001382 | Svaricin                     | 46 | 99.8  | 332 | 8.8E-91  |
| SPV_cluster_160 | Cf_fatty_acid | ALV82456 | BGC0001382 | Svaricin                     | 50 | 98.8  | 387 | 1.8E-107 |
| SPV_cluster_162 | Cf_fatty_acid | AAG04388 | BGC0000922 | Pseudomonas_quinolone_signal | 40 | 94.6  | 231 | 1.4E-60  |
| SPV_cluster_173 | Cf_fatty_acid | ALV82456 | BGC0001382 | Svaricin                     | 46 | 97.4  | 370 | 3.0E-102 |
| SPV_cluster_178 | Cf_fatty_acid | ALV82456 | BGC0001382 | Svaricin                     | 46 | 100.0 | 351 | 1.4E-96  |
| SPV_cluster_179 | Cf_fatty_acid | CAA16177 | BGC0001063 | Undecylprodigiosin           | 44 | 103.1 | 279 | 6.4E-75  |
| SPV_cluster_180 | Cf_fatty_acid | ALV82456 | BGC0001382 | Svaricin                     | 47 | 97.8  | 372 | 7.6E-103 |
| SPV_cluster_182 | Cf_fatty_acid | ALV82456 | BGC0001382 | Svaricin                     | 49 | 98.3  | 362 | 6.0E-100 |
| SPV_cluster_189 | Cf_fatty_acid | CAA16179 | BGC0001063 | Undecylprodigiosin           | 43 | 89.9  | 242 | 8.1E-64  |
| SPV_cluster_192 | Cf_fatty_acid | ALV82456 | BGC0001382 | Svaricin                     | 46 | 97.4  | 372 | 6.0E-103 |
| SPV_cluster_195 | Cf_fatty_acid | ALV82456 | BGC0001382 | Svaricin                     | 42 | 98.3  | 326 | 4.8E-89  |
| SPV_cluster_197 | Cf_fatty_acid | ALV82456 | BGC0001382 | Svaricin                     | 48 | 98.5  | 371 | 1.3E-102 |
| SPV_cluster_200 | Cf_fatty_acid | CAA16179 | BGC0001063 | Undecylprodigiosin           | 45 | 75.9  | 254 | 2.4E-67  |
| SPV_cluster_201 | Cf_fatty_acid | ALV82456 | BGC0001382 | Svaricin                     | 46 | 96.5  | 369 | 6.7E-102 |
| SPV_cluster_205 | Cf_fatty_acid | ALV82456 | BGC0001382 | Svaricin                     | 50 | 97.4  | 375 | 9.3E-104 |

|                 |               |          |            |                    |    |       |     |          |
|-----------------|---------------|----------|------------|--------------------|----|-------|-----|----------|
| SPV_cluster_207 | Cf_fatty_acid | ALV82456 | BGC0001382 | Svaricin           | 48 | 98.5  | 373 | 4.5E-103 |
| SPV_cluster_209 | Cf_fatty_acid | ALV82456 | BGC0001382 | Svaricin           | 44 | 99.0  | 352 | 8.2E-97  |
| SPV_cluster_215 | Cf_fatty_acid | CAA16177 | BGC0001063 | Undecylprodigiosin | 46 | 98.8  | 332 | 6.6E-91  |
| SPV_cluster_216 | Cf_fatty_acid | ALV82456 | BGC0001382 | Svaricin           | 37 | 98.1  | 305 | 1.2E-82  |
| SPV_cluster_217 | Cf_fatty_acid | ALV82456 | BGC0001382 | Svaricin           | 46 | 99.3  | 355 | 7.4E-98  |
| SPV_cluster_219 | Cf_fatty_acid | AAF81236 | BGC0000243 | Macrotetrolide     | 27 | 103.0 | 94  | 3.3E-19  |
| SPV_cluster_222 | Cf_fatty_acid | ALV82456 | BGC0001382 | Svaricin           | 47 | 98.1  | 369 | 6.5E-102 |
| SPV_cluster_224 | Cf_fatty_acid | AHF22848 | BGC0000091 | Marineosin         | 47 | 102.5 | 309 | 4.4E-84  |
| SPV_cluster_228 | Cf_fatty_acid | ACU59351 | BGC0000839 | Flexirubin         | 41 | 100.7 | 290 | 2.9E-78  |
| SPV_cluster_229 | Cf_fatty_acid | EDY42532 | BGC0000212 | Cinerubin_B        | 34 | 107.0 | 160 | 4.4E-39  |
| SPV_cluster_230 | Cf_fatty_acid | ABQ04139 | BGC0000838 | Flexirubin         | 40 | 100.0 | 269 | 6.9E-72  |
| SPV_cluster_233 | Cf_fatty_acid | AHA12083 | BGC0001172 | Chlorizidine_A     | 42 | 98.3  | 274 | 2.2E-73  |
| SPV_cluster_235 | Cf_fatty_acid | ALV82456 | BGC0001382 | Svaricin           | 47 | 98.5  | 377 | 1.8E-104 |
| SPV_cluster_236 | Cf_fatty_acid | ALV82456 | BGC0001382 | Svaricin           | 41 | 102.2 | 245 | 1.0E-64  |
| SPV_cluster_239 | Cf_fatty_acid | ALV82456 | BGC0001382 | Svaricin           | 47 | 99.5  | 339 | 4.2E-93  |
| SPV_cluster_240 | Cf_fatty_acid | ALV82456 | BGC0001382 | Svaricin           | 40 | 98.3  | 301 | 1.3E-81  |
| SPV_cluster_243 | Cf_fatty_acid | AIT38298 | BGC0000382 | Lipstatin          | 33 | 47.3  | 156 | 1.4E-37  |
| SPV_cluster_250 | Cf_fatty_acid | ACU59351 | BGC0000839 | Flexirubin         | 34 | 100.7 | 218 | 1.9E-56  |
| SPV_cluster_251 | Cf_fatty_acid | ALV82456 | BGC0001382 | Svaricin           | 47 | 98.8  | 373 | 2.6E-103 |
| SPV_cluster_254 | Cf_fatty_acid | ALV82456 | BGC0001382 | Svaricin           | 46 | 99.3  | 355 | 9.7E-98  |
| SPV_cluster_255 | Cf_fatty_acid | ALV82456 | BGC0001382 | Svaricin           | 47 | 98.3  | 358 | 1.5E-98  |
| SPV_cluster_256 | Cf_fatty_acid | CAA16179 | BGC0001063 | Undecylprodigiosin | 45 | 93.5  | 267 | 1.7E-71  |
| SPV_cluster_258 | Cf_fatty_acid | CAA16177 | BGC0001063 | Undecylprodigiosin | 50 | 99.3  | 386 | 3.0E-107 |
| SPV_cluster_259 | Cf_fatty_acid | ALV82456 | BGC0001382 | Svaricin           | 48 | 99.1  | 367 | 2.5E-101 |
| SPV_cluster_261 | Cf_fatty_acid | ACU59351 | BGC0000839 | Flexirubin         | 27 | 44.4  | 78  | 2.9E-14  |
| SPV_cluster_262 | Cf_fatty_acid | ACA34361 | BGC0001152 | Fusaricidin        | 42 | 99.2  | 277 | 2.2E-74  |
| SPV_cluster_263 | Cf_fatty_acid | ALV82456 | BGC0001382 | Svaricin           | 49 | 98.8  | 396 | 3.8E-110 |
| SPV_cluster_271 | Cf_fatty_acid | ALV82456 | BGC0001382 | Svaricin           | 48 | 97.8  | 381 | 9.7E-106 |
| SPV_cluster_274 | Cf_fatty_acid | ALV82456 | BGC0001382 | Svaricin           | 50 | 98.3  | 371 | 1.7E-102 |
| SPV_cluster_275 | Cf_fatty_acid | ADG86315 | BGC0000190 | A-74528            | 40 | 96.9  | 298 | 1.4E-80  |
| SPV_cluster_276 | Cf_fatty_acid | ALV82456 | BGC0001382 | Svaricin           | 42 | 97.4  | 317 | 2.3E-86  |
| SPV_cluster_279 | Cf_fatty_acid | ACA34361 | BGC0001152 | Fusaricidin        | 49 | 96.2  | 350 | 2.7E-96  |

|                 |               |                      |            |                              |    |       |     |          |
|-----------------|---------------|----------------------|------------|------------------------------|----|-------|-----|----------|
| SPV_cluster_280 | Cf_fatty_acid | ALV82456             | BGC0001382 | Svaricin                     | 45 | 98.8  | 363 | 3.5E-100 |
| SPV_cluster_284 | Cf_fatty_acid | ALV82456             | BGC0001382 | Svaricin                     | 47 | 99.3  | 369 | 3.8E-102 |
| SPV_cluster_285 | Cf_fatty_acid | CAA16179             | BGC0001063 | Undecylprodigiosin           | 43 | 94.3  | 240 | 2.9E-63  |
| SPV_cluster_289 | Cf_fatty_acid | ALV82456             | BGC0001382 | Svaricin                     | 48 | 98.8  | 364 | 2.1E-100 |
| SPV_cluster_290 | Cf_fatty_acid | CAA16177             | BGC0001063 | Undecylprodigiosin           | 44 | 102.8 | 297 | 2.3E-80  |
| SPV_cluster_293 | Cf_fatty_acid | ABQ04139             | BGC0000838 | Flexirubin                   | 40 | 100.5 | 294 | 1.5E-79  |
| SPV_cluster_296 | Cf_fatty_acid | CAA16179             | BGC0001063 | Undecylprodigiosin           | 40 | 87.1  | 225 | 7.9E-59  |
| SPV_cluster_301 | Cf_fatty_acid | ALV82456             | BGC0001382 | Svaricin                     | 44 | 95.8  | 339 | 5.6E-93  |
| SPV_cluster_307 | Cf_fatty_acid | CAA16177             | BGC0001063 | Undecylprodigiosin           | 46 | 98.8  | 329 | 4.3E-90  |
| SPV_cluster_308 | Cf_fatty_acid | AHA12083             | BGC0001172 | Chlorizidine_A               | 39 | 97.6  | 280 | 3.1E-75  |
| SPV_cluster_313 | Cf_fatty_acid | AEK75497             | BGC0000001 | Abyssomicin                  | 26 | 85.7  | 61  | 3.1E-09  |
| SPV_cluster_316 | Cf_fatty_acid | ALV82456             | BGC0001382 | Svaricin                     | 49 | 98.5  | 371 | 1.0E-102 |
| SPV_cluster_317 | Cf_fatty_acid | CAA16177             | BGC0001063 | Undecylprodigiosin           | 52 | 98.8  | 348 | 1.2E-95  |
| SPV_cluster_318 | Cf_fatty_acid | ABQ04139             | BGC0000838 | Flexirubin                   | 42 | 100.6 | 265 | 6.5E-71  |
| SPV_cluster_320 | Cf_fatty_acid | AHF22848             | BGC0000091 | Marineosin                   | 46 | 103.8 | 305 | 8.4E-83  |
| SPV_cluster_322 | Cf_fatty_acid | CAB38890             | BGC0000315 | Calcium-dependent_antibiotic | 44 | 87.8  | 240 | 2.4E-63  |
| SPV_cluster_324 | Cf_fatty_acid | ALV82456             | BGC0001382 | Svaricin                     | 44 | 99.0  | 353 | 3.7E-97  |
| SPV_cluster_329 | Cf_fatty_acid | ALV82456             | BGC0001382 | Svaricin                     | 46 | 98.5  | 364 | 1.6E-100 |
| SPV_cluster_330 | Cf_fatty_acid | ALV82456             | BGC0001382 | Svaricin                     | 46 | 99.4  | 294 | 1.3E-79  |
| SPV_cluster_334 | Cf_fatty_acid | ALV82456             | BGC0001382 | Svaricin                     | 49 | 99.0  | 377 | 1.8E-104 |
| SPV_cluster_337 | Cf_fatty_acid | AHA12083             | BGC0001172 | Chlorizidine_A               | 47 | 73.0  | 224 | 1.8E-58  |
| SPV_cluster_339 | Cf_fatty_acid | ALV82456             | BGC0001382 | Svaricin                     | 49 | 98.8  | 377 | 1.8E-104 |
| SPV_cluster_340 | Cf_fatty_acid | ALV82456             | BGC0001382 | Svaricin                     | 44 | 96.0  | 344 | 1.7E-94  |
| SPV_cluster_341 | Cf_fatty_acid | ALV82456             | BGC0001382 | Svaricin                     | 50 | 98.3  | 370 | 2.3E-102 |
| SPV_cluster_349 | Cf_fatty_acid | ALV82456             | BGC0001382 | Svaricin                     | 50 | 98.7  | 339 | 3.8E-93  |
| SPV_cluster_352 | Cf_fatty_acid | CAA16179             | BGC0001063 | Undecylprodigiosin           | 42 | 92.9  | 242 | 6.0E-64  |
| SPV_cluster_353 | Cf_fatty_acid | ALV82456             | BGC0001382 | Svaricin                     | 50 | 96.9  | 369 | 5.0E-102 |
| SPV_cluster_354 | Cf_fatty_acid | AMEG_HIPS_SALB_00467 | BGC0001150 | Pamamycin                    | 36 | 85.4  | 178 | 1.4E-44  |
| SPV_cluster_358 | Cf_fatty_acid | ALV82456             | BGC0001382 | Svaricin                     | 43 | 100.6 | 261 | 1.2E-69  |
| SPV_cluster_359 | Cf_fatty_acid | CAA16179             | BGC0001063 | Undecylprodigiosin           | 46 | 92.6  | 254 | 2.0E-67  |
| SPV_cluster_362 | Cf_fatty_acid | ALV82456             | BGC0001382 | Svaricin                     | 49 | 97.4  | 373 | 4.6E-103 |

|                 |               |          |            |                              |    |       |     |          |
|-----------------|---------------|----------|------------|------------------------------|----|-------|-----|----------|
| SPV_cluster_363 | Cf_fatty_acid | ALV82456 | BGC0001382 | Svaricin                     | 43 | 98.6  | 324 | 2.4E-88  |
| SPV_cluster_364 | Cf_fatty_acid | CAA16177 | BGC0001063 | Undecylprodigiosin           | 45 | 96.4  | 320 | 3.5E-87  |
| SPV_cluster_366 | Cf_fatty_acid | ABQ04139 | BGC0000838 | Flexirubin                   | 39 | 100.2 | 270 | 2.4E-72  |
| SPV_cluster_367 | Cf_fatty_acid | AEE65468 | BGC0000223 | Fluostatin                   | 42 | 99.5  | 317 | 2.3E-86  |
| SPV_cluster_375 | Cf_fatty_acid | ABQ04139 | BGC0000838 | Flexirubin                   | 40 | 100.2 | 292 | 9.8E-79  |
| SPV_cluster_379 | Cf_fatty_acid | CAA16179 | BGC0001063 | Undecylprodigiosin           | 42 | 90.7  | 235 | 7.5E-62  |
| SPV_cluster_389 | Cf_fatty_acid | ALV82456 | BGC0001382 | Svaricin                     | 50 | 98.8  | 401 | 9.0E-112 |
| SPV_cluster_400 | Cf_fatty_acid | ALV82456 | BGC0001382 | Svaricin                     | 48 | 97.4  | 370 | 2.2E-102 |
| SPV_cluster_401 | Cf_fatty_acid | ACU59351 | BGC0000839 | Flexirubin                   | 40 | 99.0  | 282 | 1.0E-75  |
| SPV_cluster_402 | Cf_fatty_acid | ALV82456 | BGC0001382 | Svaricin                     | 47 | 98.1  | 351 | 1.4E-96  |
| SPV_cluster_403 | Cf_fatty_acid | ACA34361 | BGC0001152 | Fusaricidin                  | 48 | 96.4  | 333 | 2.6E-91  |
| SPV_cluster_406 | Cf_fatty_acid | ALV82456 | BGC0001382 | Svaricin                     | 47 | 98.6  | 315 | 7.5E-86  |
| SPV_cluster_408 | Cf_fatty_acid | CBJ83012 | BGC0000189 | Xenocylins                   | 49 | 99.8  | 411 | 1.2E-114 |
| SPV_cluster_410 | Cf_fatty_acid | CAB38890 | BGC0000315 | Calcium-dependent_antibiotic | 42 | 89.1  | 229 | 6.9E-60  |
| SPV_cluster_411 | Cf_fatty_acid | CAA16177 | BGC0001063 | Undecylprodigiosin           | 38 | 97.2  | 186 | 4.0E-47  |
| SPV_cluster_414 | Cf_fatty_acid | CAA16177 | BGC0001063 | Undecylprodigiosin           | 47 | 98.3  | 310 | 3.5E-84  |
| SPV_cluster_416 | Cf_fatty_acid | ACU59351 | BGC0000839 | Flexirubin                   | 42 | 101.5 | 270 | 3.1E-72  |
| SPV_cluster_417 | Cf_fatty_acid | ALV82456 | BGC0001382 | Svaricin                     | 45 | 100.0 | 359 | 3.9E-99  |
| SPV_cluster_419 | Cf_fatty_acid | ALV82456 | BGC0001382 | Svaricin                     | 49 | 99.0  | 381 | 9.7E-106 |
| SPV_cluster_423 | Cf_fatty_acid | ACA34361 | BGC0001152 | Fusaricidin                  | 49 | 91.9  | 336 | 5.6E-92  |
| SPV_cluster_430 | Cf_fatty_acid | ALV82456 | BGC0001382 | Svaricin                     | 48 | 99.5  | 374 | 2.0E-103 |
| SPV_cluster_432 | Cf_fatty_acid | ALV82456 | BGC0001382 | Svaricin                     | 48 | 99.7  | 303 | 3.7E-82  |
| SPV_cluster_433 | Cf_fatty_acid | ALV82456 | BGC0001382 | Svaricin                     | 50 | 94.5  | 375 | 9.5E-104 |
| SPV_cluster_436 | Cf_fatty_acid | ALV82456 | BGC0001382 | Svaricin                     | 50 | 96.7  | 346 | 4.3E-95  |
| SPV_cluster_438 | Cf_fatty_acid | ABQ04139 | BGC0000838 | Flexirubin                   | 41 | 100.6 | 259 | 4.8E-69  |
| SPV_cluster_441 | Cf_fatty_acid | ALV82456 | BGC0001382 | Svaricin                     | 44 | 98.3  | 340 | 2.5E-93  |
| SPV_cluster_442 | Cf_fatty_acid | ALV82456 | BGC0001382 | Svaricin                     | 42 | 96.5  | 310 | 2.6E-84  |
| SPV_cluster_443 | Cf_fatty_acid | CAA16177 | BGC0001063 | Undecylprodigiosin           | 48 | 99.2  | 301 | 1.1E-81  |
| SPV_cluster_444 | Cf_fatty_acid | ALV82456 | BGC0001382 | Svaricin                     | 48 | 97.3  | 327 | 2.6E-89  |
| SPV_cluster_445 | Cf_fatty_acid | ALV82456 | BGC0001382 | Svaricin                     | 48 | 100.2 | 363 | 3.6E-100 |
| SPV_cluster_461 | Cf_fatty_acid | ACA34361 | BGC0001152 | Fusaricidin                  | 51 | 97.9  | 329 | 6.1E-90  |
| SPV_cluster_092 | Ladderane     | CAL48955 | BGC0001343 | Aurachin                     | 38 | 97.4  | 254 | 2.4E-67  |

|                 |              |          |            |                            |    |       |      |          |
|-----------------|--------------|----------|------------|----------------------------|----|-------|------|----------|
| SPV_cluster_125 | Ladderane    | CAL48955 | BGC0001343 | Aurachin                   | 39 | 98.3  | 257  | 2.7E-68  |
| SPV_cluster_044 | Lantipeptide | ACR33053 | BGC0000495 | Actagardine                | 30 | 101.6 | 277  | 5.0E-74  |
| SPV_cluster_061 | Lantipeptide | CAX48971 | BGC0000519 | Labyrinthopeptin_A1,A3/ A2 | 29 | 93.8  | 278  | 2.5E-74  |
| SPV_cluster_365 | Lantipeptide | CAX48971 | BGC0000519 | Labyrinthopeptin_A1,A3/ A2 | 34 | 94.4  | 356  | 7.2E-98  |
| SPV_cluster_012 | Other        | ABF88003 | BGC0000871 | VEPE/AEPE/TG-1             | 33 | 102.7 | 639  | 6.7E-183 |
| SPV_cluster_017 | Other        | ABF88003 | BGC0000871 | VEPE/AEPE/TG-1             | 29 | 73.7  | 306  | 1.1E-82  |
| SPV_cluster_018 | Other        | ABF88003 | BGC0000871 | VEPE/AEPE/TG-1             | 31 | 104.4 | 619  | 7.3E-177 |
| SPV_cluster_022 | Other        | ABF87031 | BGC0000393 | Myxoprincomide             | 42 | 53.9  | 364  | 5.2E-100 |
| SPV_cluster_068 | Other        | ACR50797 | BGC0000163 | Tetronasin                 | 37 | 62.8  | 337  | 3.6E-92  |
| SPV_cluster_088 | Other        | ABF88003 | BGC0000871 | VEPE/AEPE/TG-1             | 29 | 107.4 | 285  | 2.6E-76  |
| SPV_cluster_097 | Other        | BAE93741 | BGC0000164 | Tetronomycin               | 37 | 60.4  | 329  | 1.7E-89  |
| SPV_cluster_098 | Other        | ABF88003 | BGC0000871 | VEPE/AEPE/TG-1             | 33 | 61.9  | 469  | 1.3E-131 |
| SPV_cluster_104 | Other        | ABF88003 | BGC0000871 | VEPE/AEPE/TG-1             | 30 | 104.8 | 593  | 7.3E-169 |
| SPV_cluster_117 | Other        | ABF88003 | BGC0000871 | VEPE/AEPE/TG-1             | 28 | 92.9  | 223  | 9.5E-58  |
| SPV_cluster_132 | Other        | ABF88003 | BGC0000871 | VEPE/AEPE/TG-1             | 44 | 101.9 | 1125 | 0.0E+00  |
| SPV_cluster_157 | Other        | ACR50797 | BGC0000163 | Tetronasin                 | 39 | 55.0  | 367  | 5.8E-101 |
| SPV_cluster_165 | Other        | ABF88003 | BGC0000871 | VEPE/AEPE/TG-1             | 31 | 95.4  | 396  | 8.2E-110 |
| SPV_cluster_185 | Other        | ABF87031 | BGC0000393 | Myxoprincomide             | 42 | 57.9  | 363  | 6.4E-100 |
| SPV_cluster_193 | Other        | ACR50797 | BGC0000163 | Tetronasin                 | 37 | 58.9  | 351  | 3.1E-96  |
| SPV_cluster_238 | Other        | ABF88003 | BGC0000871 | VEPE/AEPE/TG-1             | 32 | 102.2 | 603  | 5.4E-172 |
| SPV_cluster_252 | Other        | ABF88003 | BGC0000871 | VEPE/AEPE/TG-1             | 31 | 102.3 | 619  | 7.4E-177 |
| SPV_cluster_265 | Other        | ABF88003 | BGC0000871 | VEPE/AEPE/TG-1             | 32 | 102.5 | 472  | 9.4E-133 |
| SPV_cluster_267 | Other        | ABF87031 | BGC0000393 | Myxoprincomide             | 41 | 54.9  | 354  | 4.1E-97  |
| SPV_cluster_270 | Other        | ACR50797 | BGC0000163 | Tetronasin                 | 36 | 84.0  | 347  | 3.2E-95  |
| SPV_cluster_277 | Other        | ABF88003 | BGC0000871 | VEPE/AEPE/TG-1             | 32 | 97.6  | 302  | 1.8E-81  |
| SPV_cluster_283 | Other        | CAQ71826 | BGC0001189 | Taiwachelin                | 41 | 74.5  | 252  | 1.1E-66  |
| SPV_cluster_294 | Other        | BAK64635 | BGC0000135 | Reveromycin                | 40 | 60.1  | 357  | 5.9E-98  |
| SPV_cluster_295 | Other        | AEU11005 | BGC0001029 | Nostophycin                | 29 | 91.6  | 420  | 7.0E-117 |
| SPV_cluster_342 | Other        | ADC79613 | BGC0000028 | Bafilomycin                | 28 | 62.6  | 151  | 5.7E-36  |
| SPV_cluster_343 | Other        | ABF88003 | BGC0000871 | VEPE/AEPE/TG-1             | 31 | 100.8 | 293  | 7.2E-79  |
| SPV_cluster_344 | Other        | ABF88003 | BGC0000871 | VEPE/AEPE/TG-1             | 28 | 102.2 | 215  | 2.2E-55  |
| SPV_cluster_361 | Other        | ABF88003 | BGC0000871 | VEPE/AEPE/TG-1             | 30 | 97.0  | 128  | 1.6E-29  |

|                 |             |           |            |                  |    |       |     |          |
|-----------------|-------------|-----------|------------|------------------|----|-------|-----|----------|
| SPV_cluster_369 | Other       | AAV93445  | BGC0000413 | Pyoverdine       | 40 | 66.6  | 123 | 5.1E-28  |
| SPV_cluster_392 | Other       | CAQ71826  | BGC0001189 | Taiwachelin      | 40 | 74.5  | 325 | 2.0E-88  |
| SPV_cluster_393 | Other       | ABF88003  | BGC0000871 | VEPE/AEPE/TG-1   | 28 | 99.8  | 212 | 2.0E-54  |
| SPV_cluster_407 | Other       | BAE93741  | BGC0000164 | Tetronomycin     | 37 | 83.0  | 340 | 5.2E-93  |
| SPV_cluster_420 | Other       | ABF88003  | BGC0000871 | VEPE/AEPE/TG-1   | 33 | 105.1 | 338 | 1.5E-92  |
| SPV_cluster_437 | Other       | ABF87031  | BGC0000393 | Myxoprincomide   | 40 | 71.3  | 232 | 9.1E-61  |
| SPV_cluster_449 | Other       | ABF88003  | BGC0000871 | VEPE/AEPE/TG-1   | 27 | 104.0 | 143 | 6.3E-34  |
| SPV_cluster_089 | Phosphonate | ADB43073  | BGC0000926 | Rhizocticin      | 48 | 50.6  | 255 | 1.4E-67  |
| SPV_cluster_158 | Phosphonate | ADB43073  | BGC0000926 | Rhizocticin      | 51 | 53.7  | 290 | 5.0E-78  |
| SPV_cluster_170 | Phosphonate | ADB43073  | BGC0000926 | Rhizocticin      | 48 | 52.7  | 275 | 9.8E-74  |
| SPV_cluster_319 | Phosphonate | ADB43073  | BGC0000926 | Rhizocticin      | 43 | 54.6  | 249 | 7.5E-66  |
| SPV_cluster_335 | Phosphonate | CAJ14044  | BGC0000406 | Phosphinothricin | 50 | 49.6  | 233 | 6.6E-61  |
| SPV_cluster_452 | Phosphonate | ADB43073  | BGC0000926 | Rhizocticin      | 48 | 43.0  | 177 | 2.9E-44  |
| SPV_cluster_004 | Terpene     | NP_199612 | BGC0000670 | Thalianol        | 32 | 59.3  | 319 | 1.6E-86  |
| SPV_cluster_006 | Terpene     | -         | -          | -                | -  | -     | -   | -        |
| SPV_cluster_010 | Terpene     | -         | -          | -                | -  | -     | -   | -        |
| SPV_cluster_011 | Terpene     | NP_199612 | BGC0000670 | Thalianol        | 32 | 58.9  | 329 | 1.2E-89  |
| SPV_cluster_013 | Terpene     | -         | -          | -                | -  | -     | -   | -        |
| SPV_cluster_019 | Terpene     | CAB39693  | BGC0000663 | Hopene           | 40 | 56.7  | 135 | 1.4E-31  |
| SPV_cluster_023 | Terpene     | CAB39697  | BGC0000663 | Hopene           | 32 | 70.8  | 153 | 7.7E-37  |
| SPV_cluster_041 | Terpene     | CAB39697  | BGC0000663 | Hopene           | 30 | 67.0  | 137 | 4.4E-32  |
| SPV_cluster_048 | Terpene     | -         | -          | -                | -  | -     | -   | -        |
| SPV_cluster_050 | Terpene     | CAB39697  | BGC0000663 | Hopene           | 41 | 88.4  | 481 | 1.5E-135 |
| SPV_cluster_055 | Terpene     | ABP56869  | BGC0001087 | Sioxanthin       | 29 | 71.5  | 66  | 5.7E-11  |
| SPV_cluster_056 | Terpene     | -         | -          | -                | -  | -     | -   | -        |
| SPV_cluster_058 | Terpene     | CAB39697  | BGC0000663 | Hopene           | 46 | 99.3  | 575 | 9.6E-164 |
| SPV_cluster_059 | Terpene     | -         | -          | -                | -  | -     | -   | -        |
| SPV_cluster_062 | Terpene     | -         | -          | -                | -  | -     | -   | -        |
| SPV_cluster_063 | Terpene     | ABP55685  | BGC0001087 | Sioxanthin       | 43 | 99.7  | 243 | 4.6E-64  |
| SPV_cluster_070 | Terpene     | CAA79957  | BGC0000648 | Carotenoid       | 34 | 90.2  | 153 | 4.7E-37  |
| SPV_cluster_072 | Terpene     | CAB39697  | BGC0000663 | Hopene           | 42 | 90.3  | 520 | 3.0E-147 |
| SPV_cluster_075 | Terpene     | -         | -          | -                | -  | -     | -   | -        |

|                 |         |                     |            |                              |    |      |     |          |
|-----------------|---------|---------------------|------------|------------------------------|----|------|-----|----------|
| SPV_cluster_077 | Terpene | -                   | -          | -                            | -  | -    | -   | -        |
| SPV_cluster_079 | Terpene | CAB39697            | BGC0000663 | Hopene                       | 40 | 93.9 | 452 | 9.5E-127 |
| SPV_cluster_080 | Terpene | -                   | -          | -                            | -  | -    | -   | -        |
| SPV_cluster_087 | Terpene | CAB39697            | BGC0000663 | Hopene                       | 59 | 96.6 | 751 | 7.3E-217 |
| SPV_cluster_095 | Terpene | -                   | -          | -                            | -  | -    | -   | -        |
| SPV_cluster_100 | Terpene | NP_199612           | BGC0000670 | Thalianol                    | 31 | 57.4 | 129 | 1.4E-29  |
| SPV_cluster_103 | Terpene | -                   | -          | -                            | -  | -    | -   | -        |
| SPV_cluster_105 | Terpene | chr3.CM0292.40.r2.m | BGC0001317 | Lupeol                       | 34 | 98.5 | 378 | 1.7E-104 |
| SPV_cluster_110 | Terpene | -                   | -          | -                            | -  | -    | -   | -        |
| SPV_cluster_116 | Terpene | AMY15074            | BGC0001339 | Squalestatin_S1              | 26 | 83.1 | 90  | 5.0E-18  |
| SPV_cluster_118 | Terpene | NP_199612           | BGC0000670 | Thalianol                    | 32 | 60.4 | 319 | 2.1E-86  |
| SPV_cluster_120 | Terpene | -                   | -          | -                            | -  | -    | -   | -        |
| SPV_cluster_127 | Terpene | -                   | -          | -                            | -  | -    | -   | -        |
| SPV_cluster_140 | Terpene | ACF70484            | BGC0001248 | Clavaric_acid                | 34 | 58.1 | 370 | 6.1E-102 |
| SPV_cluster_142 | Terpene | -                   | -          | -                            | -  | -    | -   | -        |
| SPV_cluster_143 | Terpene | -                   | -          | -                            | -  | -    | -   | -        |
| SPV_cluster_144 | Terpene | -                   | -          | -                            | -  | -    | -   | -        |
| SPV_cluster_147 | Terpene | -                   | -          | -                            | -  | -    | -   | -        |
| SPV_cluster_156 | Terpene | ABP55685            | BGC0001087 | Sioxanthin                   | 44 | 99.4 | 243 | 2.7E-64  |
| SPV_cluster_164 | Terpene | -                   | -          | -                            | -  | -    | -   | -        |
| SPV_cluster_175 | Terpene | CAB39697            | BGC0000663 | Hopene                       | 45 | 98.4 | 569 | 7.0E-162 |
| SPV_cluster_177 | Terpene | AIG94830            | BGC0001086 | Astaxanthin_dideoxyglycoside | 44 | 95.9 | 260 | 4.0E-69  |
| SPV_cluster_183 | Terpene | -                   | -          | -                            | -  | -    | -   | -        |
| SPV_cluster_184 | Terpene | -                   | -          | -                            | -  | -    | -   | -        |
| SPV_cluster_186 | Terpene | -                   | -          | -                            | -  | -    | -   | -        |
| SPV_cluster_187 | Terpene | -                   | -          | -                            | -  | -    | -   | -        |
| SPV_cluster_188 | Terpene | -                   | -          | -                            | -  | -    | -   | -        |
| SPV_cluster_190 | Terpene | NP_199612           | BGC0000670 | Thalianol                    | 33 | 62.0 | 318 | 3.4E-86  |
| SPV_cluster_196 | Terpene | chr3.CM0292.40.r2.m | BGC0001317 | Lupeol                       | 35 | 57.8 | 376 | 8.6E-104 |
| SPV_cluster_203 | Terpene | ABP55685            | BGC0001087 | Sioxanthin                   | 44 | 99.4 | 247 | 2.4E-65  |
| SPV_cluster_223 | Terpene | -                   | -          | -                            | -  | -    | -   | -        |
| SPV_cluster_231 | Terpene | ACF70484            | BGC0001248 | Clavaric_acid                | 32 | 61.4 | 366 | 1.5E-100 |



|                 |         |                     |            |                 |    |       |     |          |
|-----------------|---------|---------------------|------------|-----------------|----|-------|-----|----------|
| SPV_cluster_232 | Terpene | chr3.CM0292.40.r2.m | BGC0001317 | Lupeol          | 35 | 59.4  | 381 | 4.4E-105 |
| SPV_cluster_234 | Terpene | -                   | -          | -               | -  | -     | -   | -        |
| SPV_cluster_242 | Terpene | CAB39697            | BGC0000663 | Hopene          | 51 | 98.1  | 664 | 1.2E-190 |
| SPV_cluster_244 | Terpene | CAB39697            | BGC0000663 | Hopene          | 41 | 96.8  | 476 | 6.0E-134 |
| SPV_cluster_247 | Terpene | CAB39693            | BGC0000663 | Hopene          | 47 | 89.9  | 257 | 2.2E-68  |
| SPV_cluster_248 | Terpene | CAB39697            | BGC0000663 | Hopene          | 55 | 98.9  | 727 | 1.2E-209 |
| SPV_cluster_249 | Terpene | AAB31139            | BGC0000647 | Carotenoid      | 37 | 40.7  | 159 | 1.6E-38  |
| SPV_cluster_257 | Terpene | -                   | -          | -               | -  | -     | -   | -        |
| SPV_cluster_272 | Terpene | CAB39697            | BGC0000663 | Hopene          | 43 | 97.1  | 497 | 3.3E-140 |
| SPV_cluster_282 | Terpene | CAB39697            | BGC0000663 | Hopene          | 48 | 96.9  | 614 | 1.1E-175 |
| SPV_cluster_286 | Terpene | CAB39697            | BGC0000663 | Hopene          | 51 | 98.4  | 661 | 9.8E-190 |
| SPV_cluster_288 | Terpene | chr3.CM0292.40.r2.m | BGC0001317 | Lupeol          | 34 | 61.5  | 381 | 4.4E-105 |
| SPV_cluster_298 | Terpene | NP_199612           | BGC0000670 | Thalianol       | 34 | 101.8 | 250 | 5.2E-66  |
| SPV_cluster_303 | Terpene | BAG16278            | BGC0000632 | Brasilicardin_A | 33 | 32.9  | 75  | 2.0E-13  |
| SPV_cluster_304 | Terpene | CAB39697            | BGC0000663 | Hopene          | 39 | 94.0  | 446 | 5.2E-125 |
| SPV_cluster_321 | Terpene | CAB39697            | BGC0000663 | Hopene          | 60 | 98.2  | 766 | 2.1E-221 |
| SPV_cluster_325 | Terpene | CAB39697            | BGC0000663 | Hopene          | 42 | 97.0  | 485 | 7.6E-137 |
| SPV_cluster_327 | Terpene | chr3.CM0292.40.r2.m | BGC0001317 | Lupeol          | 34 | 56.6  | 368 | 2.4E-101 |
| SPV_cluster_328 | Terpene | chr3.CM0292.40.r2.m | BGC0001317 | Lupeol          | 34 | 92.2  | 233 | 3.5E-61  |
| SPV_cluster_331 | Terpene | chr3.CM0292.40.r2.m | BGC0001317 | Lupeol          | 35 | 100.5 | 345 | 1.4E-94  |
| SPV_cluster_332 | Terpene | -                   | -          | -               | -  | -     | -   | -        |
| SPV_cluster_336 | Terpene | CAB39697            | BGC0000663 | Hopene          | 47 | 100.9 | 519 | 4.1E-147 |
| SPV_cluster_351 | Terpene | ABP55685            | BGC0001087 | Sioxanthin      | 44 | 99.4  | 247 | 2.4E-65  |
| SPV_cluster_370 | Terpene | -                   | -          | -               | -  | -     | -   | -        |
| SPV_cluster_372 | Terpene | CAB39697            | BGC0000663 | Hopene          | 40 | 94.1  | 406 | 6.4E-113 |
| SPV_cluster_374 | Terpene | AED94049            | BGC0001314 | Tirucalla       | 32 | 90.4  | 336 | 6.3E-92  |
| SPV_cluster_381 | Terpene | -                   | -          | -               | -  | -     | -   | -        |
| SPV_cluster_383 | Terpene | -                   | -          | -               | -  | -     | -   | -        |
| SPV_cluster_385 | Terpene | chr3.CM0292.40.r2.m | BGC0001317 | Lupeol          | 34 | 70.0  | 360 | 6.9E-99  |
| SPV_cluster_387 | Terpene | ACF70484            | BGC0001248 | Clavaric_acid   | 35 | 92.2  | 379 | 6.3E-105 |
| SPV_cluster_388 | Terpene | ACM07426            | BGC0000645 | Carotenoid      | 35 | 41.7  | 132 | 1.6E-30  |
| SPV_cluster_390 | Terpene | NP_199612           | BGC0000670 | Thalianol       | 32 | 102.4 | 276 | 7.3E-74  |

|                 |                    |                     |            |                |    |       |      |          |
|-----------------|--------------------|---------------------|------------|----------------|----|-------|------|----------|
| SPV_cluster_395 | Terpene            | -                   | -          | -              | -  | -     | -    | -        |
| SPV_cluster_397 | Terpene            | CAB39697            | BGC0000663 | Hopene         | 40 | 92.8  | 408  | 1.3E-113 |
| SPV_cluster_399 | Terpene            | chr3.CM0292.40.r2.m | BGC0001317 | Lupeol         | 34 | 101.7 | 236  | 4.9E-62  |
| SPV_cluster_409 | Terpene            | CAB39697            | BGC0000663 | Hopene         | 43 | 98.1  | 405  | 1.1E-112 |
| SPV_cluster_415 | Terpene            | CAB39697            | BGC0000663 | Hopene         | 40 | 97.7  | 371  | 1.6E-102 |
| SPV_cluster_427 | Terpene            | CAB39697            | BGC0000663 | Hopene         | 51 | 97.7  | 508  | 6.6E-144 |
| SPV_cluster_429 | Terpene            | CAB39697            | BGC0000663 | Hopene         | 40 | 99.4  | 386  | 3.9E-107 |
| SPV_cluster_434 | Terpene            | CAB39697            | BGC0000663 | Hopene         | 39 | 97.8  | 319  | 6.6E-87  |
| SPV_cluster_435 | Terpene            | CAB39697            | BGC0000663 | Hopene         | 53 | 99.2  | 512  | 4.3E-145 |
| SPV_cluster_439 | Terpene            | CAB39697            | BGC0000663 | Hopene         | 55 | 100.7 | 488  | 7.8E-138 |
| SPV_cluster_453 | Terpene            | -                   | -          | -              | -  | -     | -    | -        |
| SPV_cluster_458 | Terpene            | CAB39697            | BGC0000663 | Hopene         | 39 | 90.9  | 250  | 2.3E-66  |
| SPV_cluster_462 | Terpene            | CAB39697            | BGC0000663 | Hopene         | 49 | 100.5 | 387  | 2.1E-107 |
| SPV_cluster_463 | Terpene            | -                   | -          | -              | -  | -     | -    | -        |
| SPV_cluster_051 | TransAT-Type I PKS | AIW82279            | BGC0001125 | Puwainaphycins | 37 | 80.9  | 1490 | 0.0E+00  |
| SPV_cluster_115 | TransAT-Type I PKS | AIW82279            | BGC0001125 | Puwainaphycins | 37 | 80.5  | 1440 | 0.0E+00  |
| SPV_cluster_001 | Type I PKS         | AAF26921            | BGC0000988 | Epothilone     | 38 | 101.7 | 1287 | 0.0E+00  |
| SPV_cluster_005 | Type I PKS         | AIW82279            | BGC0001125 | Puwainaphycins | 36 | 77.6  | 1461 | 0.0E+00  |
| SPV_cluster_008 | Type I PKS         | AAS98781            | BGC0001001 | Jamaicamide    | 35 | 73.8  | 1420 | 0.0E+00  |
| SPV_cluster_020 | Type I PKS         | AIW82279            | BGC0001125 | Puwainaphycins | 37 | 76.0  | 1522 | 0.0E+00  |
| SPV_cluster_029 | Type I PKS         | AIW82279            | BGC0001125 | Puwainaphycins | 39 | 35.7  | 1516 | 0.0E+00  |
| SPV_cluster_030 | Type I PKS         | AAX98191            | BGC0000052 | ECO-02301      | 35 | 20.0  | 1774 | 0.0E+00  |
| SPV_cluster_035 | Type I PKS         | AIW82279            | BGC0001125 | Puwainaphycins | 37 | 82.0  | 1512 | 0.0E+00  |
| SPV_cluster_040 | Type I PKS         | AIW82279            | BGC0001125 | Puwainaphycins | 37 | 76.8  | 1543 | 0.0E+00  |
| SPV_cluster_047 | Type I PKS         | AIW82279            | BGC0001125 | Puwainaphycins | 38 | 76.8  | 1502 | 0.0E+00  |
| SPV_cluster_049 | Type I PKS         | BAG17643            | BGC0001043 | SGR_PTMs       | 34 | 49.2  | 540  | 7.1E-153 |
| SPV_cluster_052 | Type I PKS         | AIW82279            | BGC0001125 | Puwainaphycins | 38 | 75.4  | 1495 | 0.0E+00  |
| SPV_cluster_057 | Type I PKS         | AIW82279            | BGC0001125 | Puwainaphycins | 36 | 76.2  | 1472 | 0.0E+00  |
| SPV_cluster_065 | Type I PKS         | AGC45622            | BGC0001394 | Phenalamide    | 31 | 49.5  | 481  | 6.6E-135 |
| SPV_cluster_067 | Type I PKS         | BAG17643            | BGC0001043 | SGR_PTMs       | 34 | 48.5  | 525  | 3.1E-148 |
| SPV_cluster_071 | Type I PKS         | AIW82279            | BGC0001125 | Puwainaphycins | 37 | 77.9  | 1471 | 0.0E+00  |
| SPV_cluster_078 | Type I PKS         | AIW82279            | BGC0001125 | Puwainaphycins | 38 | 76.7  | 1488 | 0.0E+00  |

|                 |            |          |            |                   |    |      |      |          |
|-----------------|------------|----------|------------|-------------------|----|------|------|----------|
| SPV_cluster_082 | Type I PKS | AAS98781 | BGC0001001 | Jamaicamide       | 35 | 81.4 | 1400 | 0.0E+00  |
| SPV_cluster_084 | Type I PKS | AIW82279 | BGC0001125 | Puwainaphycins    | 37 | 82.6 | 1501 | 0.0E+00  |
| SPV_cluster_091 | Type I PKS | BAG17643 | BGC0001043 | SGR_PTMs          | 35 | 88.7 | 521  | 2.4E-147 |
| SPV_cluster_096 | Type I PKS | AIW82279 | BGC0001125 | Puwainaphycins    | 38 | 75.3 | 1480 | 0.0E+00  |
| SPV_cluster_102 | Type I PKS | AIW82279 | BGC0001125 | Puwainaphycins    | 38 | 75.7 | 1525 | 0.0E+00  |
| SPV_cluster_106 | Type I PKS | AAK19883 | BGC0000147 | Soraphen          | 35 | 64.5 | 1687 | 0.0E+00  |
| SPV_cluster_108 | Type I PKS | CAQ43075 | BGC0000970 | Chondrochloren    | 33 | 50.2 | 534  | 6.6E-151 |
| SPV_cluster_111 | Type I PKS | CAQ18834 | BGC0000954 | Ajudazol          | 40 | 77.3 | 231  | 2.7E-60  |
| SPV_cluster_114 | Type I PKS | AIW82279 | BGC0001125 | Puwainaphycins    | 37 | 76.3 | 1495 | 0.0E+00  |
| SPV_cluster_134 | Type I PKS | AIW82279 | BGC0001125 | Puwainaphycins    | 36 | 75.9 | 1474 | 0.0E+00  |
| SPV_cluster_141 | Type I PKS | BAG17643 | BGC0001043 | SGR_PTMs          | 36 | 47.4 | 547  | 7.5E-155 |
| SPV_cluster_146 | Type I PKS | AIW82279 | BGC0001125 | Puwainaphycins    | 37 | 76.5 | 1506 | 0.0E+00  |
| SPV_cluster_149 | Type I PKS | AIW82279 | BGC0001125 | Puwainaphycins    | 36 | 86.7 | 1453 | 0.0E+00  |
| SPV_cluster_150 | Type I PKS | AIW82279 | BGC0001125 | Puwainaphycins    | 36 | 74.0 | 1175 | 0.0E+00  |
| SPV_cluster_151 | Type I PKS | AIW82279 | BGC0001125 | Puwainaphycins    | 37 | 75.2 | 1495 | 0.0E+00  |
| SPV_cluster_153 | Type I PKS | BAG17643 | BGC0001043 | SGR_PTMs          | 35 | 49.3 | 539  | 1.6E-152 |
| SPV_cluster_154 | Type I PKS | AIW82279 | BGC0001125 | Puwainaphycins    | 37 | 76.8 | 1515 | 0.0E+00  |
| SPV_cluster_161 | Type I PKS | BAG17643 | BGC0001043 | SGR_PTMs          | 34 | 49.3 | 516  | 1.4E-145 |
| SPV_cluster_163 | Type I PKS | BAG17643 | BGC0001043 | SGR_PTMs          | 33 | 53.4 | 545  | 2.2E-154 |
| SPV_cluster_166 | Type I PKS | AGC45622 | BGC0001394 | Phenalamide       | 34 | 49.3 | 529  | 1.6E-149 |
| SPV_cluster_167 | Type I PKS | AAF62883 | BGC0000991 | Epothilone        | 42 | 89.9 | 792  | 6.1E-229 |
| SPV_cluster_168 | Type I PKS | AAS98781 | BGC0001001 | Jamaicamide       | 34 | 81.9 | 1307 | 0.0E+00  |
| SPV_cluster_169 | Type I PKS | AIW82279 | BGC0001125 | Puwainaphycins    | 38 | 52.7 | 1529 | 0.0E+00  |
| SPV_cluster_171 | Type I PKS | AIW82279 | BGC0001125 | Puwainaphycins    | 38 | 77.0 | 1510 | 0.0E+00  |
| SPV_cluster_172 | Type I PKS | AGC45622 | BGC0001394 | Phenalamide       | 34 | 47.8 | 526  | 1.4E-148 |
| SPV_cluster_174 | Type I PKS | AIW82279 | BGC0001125 | Puwainaphycins    | 37 | 75.3 | 1468 | 0.0E+00  |
| SPV_cluster_181 | Type I PKS | AIW82279 | BGC0001125 | Puwainaphycins    | 36 | 71.1 | 1157 | 0.0E+00  |
| SPV_cluster_191 | Type I PKS | AIW82279 | BGC0001125 | Puwainaphycins    | 37 | 75.2 | 1318 | 0.0E+00  |
| SPV_cluster_194 | Type I PKS | AGC45622 | BGC0001394 | Phenalamide       | 33 | 49.8 | 499  | 1.8E-140 |
| SPV_cluster_202 | Type I PKS | AAU04878 | BGC0000365 | Glycopeptidolipid | 47 | 82.1 | 527  | 3.7E-149 |
| SPV_cluster_204 | Type I PKS | BAG17643 | BGC0001043 | SGR_PTMs          | 35 | 41.2 | 438  | 3.5E-122 |
| SPV_cluster_206 | Type I PKS | AAF62883 | BGC0000991 | Epothilone        | 40 | 67.8 | 930  | 4.0E-270 |

|                 |            |          |            |                    |    |       |      |          |
|-----------------|------------|----------|------------|--------------------|----|-------|------|----------|
| SPV_cluster_208 | Type I PKS | AEE88280 | BGC0000976 | Curacin            | 36 | 101.4 | 971  | 1.7E-282 |
| SPV_cluster_210 | Type I PKS | AIW82279 | BGC0001125 | Puwainaphycins     | 37 | 66.8  | 945  | 1.0E-274 |
| SPV_cluster_211 | Type I PKS | AAQ82567 | BGC0000034 | Candidicin         | 40 | 90.7  | 902  | 7.0E-262 |
| SPV_cluster_212 | Type I PKS | AIW82279 | BGC0001125 | Puwainaphycins     | 38 | 98.0  | 1501 | 0.0E+00  |
| SPV_cluster_213 | Type I PKS | AIW82279 | BGC0001125 | Puwainaphycins     | 38 | 100.6 | 1523 | 0.0E+00  |
| SPV_cluster_214 | Type I PKS | AIW82279 | BGC0001125 | Puwainaphycins     | 37 | 76.7  | 1531 | 0.0E+00  |
| SPV_cluster_220 | Type I PKS | BAG17643 | BGC0001043 | SGR_PTMs           | 34 | 53.2  | 524  | 5.3E-148 |
| SPV_cluster_221 | Type I PKS | AHA38199 | BGC0000069 | Gephyronic_acid    | 36 | 98.8  | 1285 | 0.0E+00  |
| SPV_cluster_225 | Type I PKS | AGC45621 | BGC0001394 | Phenalamide        | 50 | 99.3  | 560  | 2.9E-159 |
| SPV_cluster_226 | Type I PKS | CAQ18828 | BGC0000954 | Ajudazol           | 37 | 77.2  | 884  | 2.4E-256 |
| SPV_cluster_227 | Type I PKS | AAF26921 | BGC0000988 | Epothilone         | 40 | 86.6  | 906  | 5.2E-263 |
| SPV_cluster_237 | Type I PKS | AIW82279 | BGC0001125 | Puwainaphycins     | 37 | 65.5  | 1323 | 0.0E+00  |
| SPV_cluster_241 | Type I PKS | AIW82279 | BGC0001125 | Puwainaphycins     | 37 | 84.1  | 1451 | 0.0E+00  |
| SPV_cluster_245 | Type I PKS | AIW82279 | BGC0001125 | Puwainaphycins     | 37 | 76.1  | 1448 | 0.0E+00  |
| SPV_cluster_246 | Type I PKS | AIW82279 | BGC0001125 | Puwainaphycins     | 38 | 78.1  | 1472 | 0.0E+00  |
| SPV_cluster_253 | Type I PKS | CAQ18828 | BGC0000954 | Ajudazol           | 45 | 100.2 | 660  | 2.3E-189 |
| SPV_cluster_260 | Type I PKS | AEU11005 | BGC0001029 | Nostophycin        | 39 | 94.1  | 882  | 6.7E-256 |
| SPV_cluster_264 | Type I PKS | BAG17643 | BGC0001043 | SGR_PTMs           | 35 | 48.8  | 548  | 4.5E-155 |
| SPV_cluster_266 | Type I PKS | CAQ18829 | BGC0000954 | Ajudazol           | 43 | 87.0  | 774  | 2.8E-223 |
| SPV_cluster_268 | Type I PKS | AEE88280 | BGC0000976 | Curacin            | 36 | 103.5 | 963  | 4.0E-280 |
| SPV_cluster_269 | Type I PKS | CAQ18828 | BGC0000954 | Ajudazol           | 44 | 98.3  | 734  | 1.5E-211 |
| SPV_cluster_273 | Type I PKS | AEU11006 | BGC0001029 | Nostophycin        | 46 | 77.8  | 521  | 1.5E-147 |
| SPV_cluster_278 | Type I PKS | CAQ18828 | BGC0000954 | Ajudazol           | 43 | 100.3 | 814  | 1.3E-235 |
| SPV_cluster_281 | Type I PKS | BAG17643 | BGC0001043 | SGR_PTMs           | 35 | 72.3  | 538  | 2.3E-152 |
| SPV_cluster_287 | Type I PKS | CAQ18828 | BGC0000954 | Ajudazol           | 38 | 72.0  | 228  | 2.3E-59  |
| SPV_cluster_291 | Type I PKS | CAQ18828 | BGC0000954 | Ajudazol           | 47 | 99.0  | 673  | 3.3E-193 |
| SPV_cluster_292 | Type I PKS | AHB82063 | BGC0001231 | Microsclerodermins | 39 | 102.5 | 386  | 6.7E-107 |
| SPV_cluster_299 | Type I PKS | CAQ18828 | BGC0000954 | Ajudazol           | 43 | 99.4  | 801  | 1.5E-231 |
| SPV_cluster_300 | Type I PKS | CBD77732 | BGC0000974 | Crocacin           | 39 | 100.9 | 412  | 1.1E-114 |
| SPV_cluster_302 | Type I PKS | CAQ18829 | BGC0000954 | Ajudazol           | 45 | 80.8  | 365  | 1.2E-100 |
| SPV_cluster_305 | Type I PKS | CAQ18829 | BGC0000954 | Ajudazol           | 43 | 88.2  | 742  | 6.6E-214 |
| SPV_cluster_306 | Type I PKS | AAF26921 | BGC0000988 | Epothilone         | 39 | 90.4  | 885  | 9.7E-257 |

|                 |            |          |            |                   |    |       |     |          |
|-----------------|------------|----------|------------|-------------------|----|-------|-----|----------|
| SPV_cluster_309 | Type I PKS | CAQ18829 | BGC0000954 | Ajudazol          | 43 | 88.4  | 590 | 4.4E-168 |
| SPV_cluster_310 | Type I PKS | CAQ43075 | BGC0000970 | Chondrochloren    | 33 | 73.5  | 505 | 2.2E-142 |
| SPV_cluster_311 | Type I PKS | CAQ18828 | BGC0000954 | Ajudazol          | 42 | 89.1  | 829 | 7.9E-240 |
| SPV_cluster_314 | Type I PKS | AAF26921 | BGC0000988 | Epothilone        | 41 | 90.4  | 936 | 4.3E-272 |
| SPV_cluster_315 | Type I PKS | CAQ18829 | BGC0000954 | Ajudazol          | 38 | 93.8  | 646 | 4.8E-185 |
| SPV_cluster_323 | Type I PKS | AIW82279 | BGC0001125 | Puwainaphycins    | 35 | 101.6 | 915 | 8.0E-266 |
| SPV_cluster_326 | Type I PKS | AAT70105 | BGC0001165 | Curacin           | 37 | 100.5 | 939 | 6.3E-273 |
| SPV_cluster_333 | Type I PKS | AEE88280 | BGC0000976 | Curacin           | 35 | 100.2 | 822 | 8.4E-238 |
| SPV_cluster_338 | Type I PKS | AAU04878 | BGC0000365 | Glycopeptidolipid | 44 | 88.2  | 554 | 2.5E-157 |
| SPV_cluster_347 | Type I PKS | AAT70105 | BGC0001165 | Curacin           | 36 | 101.4 | 773 | 3.8E-223 |
| SPV_cluster_348 | Type I PKS | AIW82279 | BGC0001125 | Puwainaphycins    | 36 | 101.9 | 788 | 1.5E-227 |
| SPV_cluster_356 | Type I PKS | AGC45622 | BGC0001394 | Phenalamide       | 34 | 90.1  | 534 | 4.8E-151 |
| SPV_cluster_357 | Type I PKS | CAQ18829 | BGC0000954 | Ajudazol          | 44 | 84.4  | 565 | 1.4E-160 |
| SPV_cluster_360 | Type I PKS | AAU04878 | BGC0000365 | Glycopeptidolipid | 49 | 101.3 | 527 | 2.8E-149 |
| SPV_cluster_368 | Type I PKS | BAG17643 | BGC0001043 | SGR_PTMs          | 34 | 97.2  | 505 | 1.2E-142 |
| SPV_cluster_371 | Type I PKS | AAU04878 | BGC0000365 | Glycopeptidolipid | 44 | 101.3 | 756 | 3.6E-218 |
| SPV_cluster_373 | Type I PKS | AAU04878 | BGC0000365 | Glycopeptidolipid | 47 | 82.7  | 493 | 3.2E-139 |
| SPV_cluster_377 | Type I PKS | CAQ18834 | BGC0000954 | Ajudazol          | 45 | 104.0 | 716 | 4.1E-206 |
| SPV_cluster_378 | Type I PKS | CAQ18828 | BGC0000954 | Ajudazol          | 42 | 101.1 | 668 | 9.8E-192 |
| SPV_cluster_382 | Type I PKS | CAQ18828 | BGC0000954 | Ajudazol          | 42 | 99.5  | 631 | 2.2E-180 |
| SPV_cluster_384 | Type I PKS | AAU04878 | BGC0000365 | Glycopeptidolipid | 45 | 79.5  | 448 | 1.5E-125 |
| SPV_cluster_386 | Type I PKS | BAG17643 | BGC0001043 | SGR_PTMs          | 34 | 91.2  | 373 | 7.8E-103 |
| SPV_cluster_391 | Type I PKS | BAG17643 | BGC0001043 | SGR_PTMs          | 32 | 88.5  | 344 | 4.9E-94  |
| SPV_cluster_394 | Type I PKS | CAQ18829 | BGC0000954 | Ajudazol          | 45 | 96.7  | 588 | 1.5E-167 |
| SPV_cluster_396 | Type I PKS | CAQ18828 | BGC0000954 | Ajudazol          | 45 | 101.1 | 673 | 2.6E-193 |
| SPV_cluster_405 | Type I PKS | CAQ18828 | BGC0000954 | Ajudazol          | 43 | 101.3 | 599 | 7.4E-171 |
| SPV_cluster_412 | Type I PKS | CBD77732 | BGC0000974 | Crocacin          | 38 | 101.3 | 446 | 7.8E-125 |
| SPV_cluster_413 | Type I PKS | AGC45620 | BGC0001394 | Phenalamide       | 47 | 89.6  | 551 | 1.3E-156 |
| SPV_cluster_418 | Type I PKS | AGC45620 | BGC0001394 | Phenalamide       | 46 | 86.7  | 480 | 3.5E-135 |
| SPV_cluster_421 | Type I PKS | AAF19810 | BGC0001024 | Myxothiazol       | 40 | 101.9 | 418 | 1.5E-116 |
| SPV_cluster_422 | Type I PKS | CAQ18834 | BGC0000954 | Ajudazol          | 42 | 97.6  | 464 | 1.8E-130 |
| SPV_cluster_425 | Type I PKS | CAQ18829 | BGC0000954 | Ajudazol          | 49 | 100.3 | 549 | 5.2E-156 |

|                 |              |          |            |                   |    |       |     |          |
|-----------------|--------------|----------|------------|-------------------|----|-------|-----|----------|
| SPV_cluster_426 | Type I PKS   | CBD77732 | BGC0000974 | Crocacin          | 39 | 102.0 | 366 | 6.2E-101 |
| SPV_cluster_428 | Type I PKS   | AAU04878 | BGC0000365 | Glycopeptidolipid | 51 | 100.0 | 527 | 2.1E-149 |
| SPV_cluster_440 | Type I PKS   | AAK57186 | BGC0001022 | Myxalamid         | 46 | 100.8 | 397 | 2.1E-110 |
| SPV_cluster_446 | Type I PKS   | CAD19092 | BGC0000153 | Stigmatellin      | 43 | 101.1 | 311 | 2.3E-84  |
| SPV_cluster_447 | Type I PKS   | CAQ18828 | BGC0000954 | Ajudazol          | 46 | 101.1 | 342 | 5.4E-94  |
| SPV_cluster_448 | Type I PKS   | AIW82282 | BGC0001125 | Puwainaphycins    | 38 | 101.8 | 296 | 5.8E-80  |
| SPV_cluster_450 | Type I PKS   | CAQ18834 | BGC0000954 | Ajudazol          | 42 | 104.3 | 284 | 2.2E-76  |
| SPV_cluster_451 | Type I PKS   | AAU04878 | BGC0000365 | Glycopeptidolipid | 45 | 100.5 | 325 | 1.1E-88  |
| SPV_cluster_454 | Type I PKS   | CBD77732 | BGC0000974 | Crocacin          | 41 | 100.2 | 270 | 4.1E-72  |
| SPV_cluster_455 | Type I PKS   | CAQ18834 | BGC0000954 | Ajudazol          | 48 | 101.7 | 338 | 9.2E-93  |
| SPV_cluster_456 | Type I PKS   | CAD19092 | BGC0000153 | Stigmatellin      | 45 | 100.5 | 299 | 6.2E-81  |
| SPV_cluster_457 | Type I PKS   | CAQ18828 | BGC0000954 | Ajudazol          | 37 | 98.8  | 220 | 2.8E-57  |
| SPV_cluster_459 | Type I PKS   | CAQ18828 | BGC0000954 | Ajudazol          | 45 | 100.3 | 289 | 8.2E-78  |
| SPV_cluster_380 | Type II PKS  | AHZ61892 | BGC0000240 | Lomaiviticin      | 30 | 100.0 | 136 | 7.1E-32  |
| SPV_cluster_090 | Type III PKS | BAG17301 | BGC0000282 | Alkylresorcinol   | 39 | 99.1  | 228 | 8.9E-60  |
| SPV_cluster_131 | Type III PKS | BAG17301 | BGC0000282 | Alkylresorcinol   | 37 | 99.7  | 213 | 3.0E-55  |
| SPV_cluster_218 | Type III PKS | BAG17301 | BGC0000282 | Alkylresorcinol   | 31 | 97.5  | 193 | 3.3E-49  |
| SPV_cluster_404 | Type III PKS | BAG17301 | BGC0000282 | Alkylresorcinol   | 40 | 97.2  | 233 | 3.7E-61  |
| SPV_cluster_460 | Type III PKS | BAG17301 | BGC0000282 | Alkylresorcinol   | 39 | 96.4  | 224 | 2.3E-58  |
